# Supplementary material for: Engineering glycosyltransferases into glycan binding proteins using a novel mammalian surface display platform
Source: Research Square preprint supplement (doi:10.21203/rs.3.rs-5004188/v1), 2025-05-02
Supplement: Supplementary file 1 [file 64e724a79d38507a3bfed368.xlsx]

## Sheet: Table S1
Table S1: Glycan microarray data for PS1 and H302A			Green in chart ID indicates that the glycan is physiologically relevant in human
Chart ID	RepoID	Sequence	PS1 5μg/mL Average RFU	PS1 5μg/mL STD	PS1 50μg/mL Average RFU	PS1 50μg/mL STD	H302A 5μg/mL Average RFU	H302A 5μg/mL STD	H302A 50μg/mL Average RFU	H302A 50μg/mL STD
1	7 Sp8	Gala-Sp8	158	6.37704	206.75	16.0286	119.25	7.932	152	7.16473
2	8 Sp8	Glca-Sp8	144	12.7279	197	19.3391	182.5	43.1239	300.25	58.2659
3	9 Sp8	Mana-Sp8	92.25	12.9711	131.25	15.2616	106.75	6.65207	228.25	49.0739
4	10 Sp8	GalNAca-Sp8	65.75	18.3371	83.5	24.9332	122.25	47.7589	163.5	72.2057
5	10Sp15	GalNAca-Sp15	33.5	7.32575	64	15.5991	57	9.38083	118	16.8721
6	11 Sp8	Fuca-Sp8	69	5.88784	78.75	6.29153	31	3.16228	57.25	5.31507
7	11 Sp9	Fuca-Sp9	71	4.69042	73.5	4.79583	67.5	6.55744	101.25	9.74252
8	12 Sp8	Rhaa-Sp8	63.75	4.92443	84.25	15.9243	85	21.7715	94.5	14.2009
9	13 Sp8	Neu5Aca-Sp8	74.5	3.69685	73.75	8.18026	73	5.83095	73.75	6.75154
10	13 Sp11	Neu5Aca-Sp11	35.75	2.06155	36.5	3.31662	32	5.88784	33.5	7.14143
11	14 Sp8	Neu5Acb-Sp8	32.25	3.77492	26.5	1	31.25	1.70783	32.5	3.10913
12	15 Sp8	Galb-Sp8	111.5	6.35085	131.25	9.81071	125	35.4213	116	37.6032
13	16 Sp8	Glcb-Sp8	132.5	17.7106	140.75	12.8938	131.5	8.69866	95.25	9.42956
14	17 Sp8	Manb-Sp8	70.75	3.20156	83.75	5.12348	61.25	6.55108	51	8.98146
15	18 Sp8	GalNAcb-Sp8	123.5	7	135.75	12.9968	107.25	25.5913	120.5	20.306
16	19 Sp0	GlcNAcb-Sp0	92	5.47723	98	9.89949	85	3.3665	73.25	16.2352
17	19 Sp8	GlcNAcb-Sp8	101.25	6.55108	146.75	20.6135	105	21.2289	112.25	13.9374
18	20 Sp8	GlcN(Gc)b-Sp8	79.75	3.77492	116	7.25718	80.25	10.5633	73.25	3.20156
19	21 Sp8	Galb1-4GlcNAcb1-6(Galb1-4GlcNAcb1-3)GalNAca-Sp8	28.25	3.40343	30.25	2.21736	13	7.39369	12	5.22813
20	21 Sp14	Galb1-4GlcNAcb1-6(Galb1-4GlcNAcb1-3)GalNAc-Sp14	25.25	4.272	27	6.68331	13.25	8.61684	17.75	6.23832
21	22 Sp8	GlcNAcb1-6(GlcNAcb1-4)(GlcNAcb1-3)GlcNAc-Sp8	26.5	4.3589	29	6.63325	23.25	4.34933	20	1.41421
22	23 Sp0	6S(3S)Galb1-4(6S)GlcNAcb-Sp0	61.25	4.71699	60.5	5.97216	50.25	15.0194	67.75	16.4595
23	24 Sp0	6S(3S)Galb1-4GlcNAcb-Sp0	47.75	4.92443	44.5	1.91485	44.75	4.19325	41.5	2.64575
24	25 Sp0	(3S)Galb1-4(Fuca1-3)(6S)Glc-Sp0	63.25	4.85627	59.75	4.34933	58.75	4.57347	62.5	4.43471
25	26 Sp8	(3S)Galb1-4Glcb-Sp8	60.25	7.32006	78.25	10.9962	47	10.6771	82.75	14.9972
26	27 Sp0	(3S)Galb1-4(6S)Glcb-Sp0	77.75	9.17878	109	19.3046	75.25	14.6373	145	17.1464
27	27 Sp8	(3S)Galb1-4(6S)Glcb-Sp8	70.75	5.12348	94.75	2.98608	58.25	9.39415	160.25	16.1529
28	29 Sp8	(3S)Galb1-3(Fuca1-4)GlcNAcb-Sp8	48.75	5.12348	74.25	12.3119	60.5	42.4931	149.5	51.2803
29	30 Sp8	(3S)Galb1-3GalNAca-Sp8	56.25	11.4127	140	16.4317	58.75	4.42531	121.25	13.8894
30	31 Sp0	(3S)Galb1-3GlcNAcb-Sp0	44.25	8.95824	48.75	7.63217	34.5	9.03696	48	2.94392
31	31 Sp8	(3S)Galb1-3GlcNAcb-Sp8	63.25	4.64579	60	7.78888	50.5	12.8193	54.25	12.6062
32	32 Sp0	(3S)Galb1-4(Fuca1-3)GlcNAc-Sp0	38.5	6.45497	41.5	1.91485	38.25	2.36291	41	1.41421
33	32 Sp8	(3S)Galb1-4(Fuca1-3)GlcNAc-Sp8	40.5	1.91485	36	4.54606	30.25	6.65207	29	4.08248
34	33 Sp0	(3S)Galb1-4(6S)GlcNAcb-Sp0	40.25	5.43906	39.5	1.29099	21.75	13.8894	26.75	8.38153
35	33 Sp8	(3S)Galb1-4(6S)GlcNAcb-Sp8	44.75	6.39661	47.5	4.04145	51.5	10.504	45	5.41603
36	34 Sp0	(3S)Galb1-4GlcNAcb-Sp0	22.25	21.1719	21.5	22.3979	10.5	15.6738	10.25	13.2759
37	34 Sp8	(3S)Galb1-4GlcNAcb-Sp8	54.25	24.2951	58	28.9021	66.5	4.50925	71	5.22813
38	35 Sp8	(3S)Galb-Sp8	133	17.4929	143.75	23.4432	135.25	8.30161	78.75	1.70783
39	37 Sp0	(6S)(4S)Galb1-4GlcNAcb-Sp0	68.25	12.339	85.75	9.28709	71.75	6.29153	93.25	7.36546
40	38 Sp8	(4S)Galb1-4GlcNAcb-Sp8	63.5	7.04746	60.25	5.5	56.5	5.44671	43.75	4.57347
41	39 Sp8	(6P)Mana-Sp8	128	6.97615	302.75	18.6793	131.5	17.8419	250.5	36.8194
42	40 Sp0	(6S)Galb1-4Glcb-Sp0	65.75	3.94757	79	9.34523	47.75	10.2103	55.5	7.50555
43	40 Sp8	(6S)Galb1-4Glcb-Sp8	39.5	11.9024	42.25	10.0457	30.25	17.0563	41.5	7.68115
44	41 Sp8	(6S)Galb1-4GlcNAcb-Sp8	51.25	4.57347	49.75	3.20156	50	6.27163	44.5	7.18795
45	42 Sp8	(6S)Galb1-4(6S)Glcb-Sp8	61.75	4.99166	63	4.08248	73	14.4914	56	4.89898
46	43 Sp8	Neu5Aca2-3(6S)Galb1-4GlcNAcb-Sp8	28.5	4.12311	31.75	3.30404	28.5	2.38048	30	4
47	44 Sp8	(6S)GlcNAcb-Sp8	88.75	4.272	81.25	0.5	87.25	12.659	68.5	10.4083
48	46 Sp8	Neu5,9Ac2a-Sp8	60.5	1.91485	56.5	4.65475	57.5	6.60808	49.75	6.65207
49	47 Sp8	Neu5,9Ac2a2-6Galb1-4GlcNAcb-Sp8	38	3.91578	44	0.816497	42.5	5.8023	104	33.1964
50	48 Sp12	Mana1-6(Mana1-3)Manb1-4GlcNAcb1-4GlcNAcb-Sp12	27.25	5.79511	33.25	11.7863	32.75	6.18466	80.25	8.73212
51	48 Sp13	Mana1-6(Mana1-3)Manb1-4GlcNAcb1-4GlcNAcb-Sp13	27.25	3.0957	30.5	1.73205	25	3.55903	55	10.3923
52	49 Sp12	GlcNAcb1-2Mana1-6(GlcNAcb1-2Mana1-3)Manb1-4GlcNAcb1-4GlcNAcb-Sp12	46.25	13.6229	60	11.1654	129.25	73.9386	77.75	40.3846
53	49 Sp13	GlcNAcb1-2Mana1-6(GlcNAcb1-2Mana1-3)Manb1-4GlcNAcb1-4GlcNAcb-Sp13	30	2.16025	36.25	10.0125	22.25	2.75379	39	1.82574
54	50 Sp12	Galb1-4GlcNAcb1-2Mana1-6(Galb1-4GlcNAcb1-2Mana1-3)Manb1-4GlcNAcb1-4GlcNAcb-Sp12	29.75	4.99166	41.5	13.1783	26.25	14.3614	60.25	12.0381
55	51 Sp12	Neu5Aca2-6Galb1-4GlcNAcb1-2Mana1-6(Neu5Aca2-6Galb1-4GlcNAcb1-2Mana1-3)Manb1-4GlcNAcb1-4GlcNAcb-Sp12	25	8.67948	29.25	10.0457	24.5	5.74456	35.75	13.5247
56	51 Sp21	Neu5Aca2-6Galb1-4GlcNAcb1-2Mana1-6(Neu5Aca2-6Galb1-4GlcNAcb1-2Man-a1-3)Manb1-4GlcNAcb1-4GlcNAcb-Sp21	21.5	1.29099	16.25	8.30161	33	17.1853	23	8.64099
57	51 Sp24	Neu5Aca2-6Galb1-4GlcNAcb1-2Mana1-6(Neu5Aca2-6Galb1-4GlcNAcb1-2Mana1-3)Manb1-4GlcNAcb1-4GlcNAcb-Sp24	39.25	5.18813	38.25	2.75379	36.25	2.5	35.5	3.41565
58	52 Sp9	Fuca1-2Galb1-3GalNAcb1-3Gala-Sp9	54.75	8.46069	56	10.0333	56.25	5.5	60.5	2.88675
59	53 Sp9	Fuca1-2Galb1-3GalNAcb1-3Gala1-4Galb1-4Glcb-Sp9	18.5	11.9583	26	23.7627	15.75	10.5	12.5	12.3962
60	54 Sp8	Fuca1-2Galb1-3(Fuca1-4)GlcNAcb-Sp8	38.75	3.40343	39.75	6.84957	30.75	7.80491	33.75	5.79511
61	56 Sp8	Fuca1-2Galb1-3GalNAca-Sp8	31	7.25718	38.5	7.14143	24	2.16025	29.5	6.45497
62	56 Sp14	Fuca1-2Galb1-3GalNAca-Sp14	31	7.16473	37	4.54606	32.75	2.98608	43.75	6.60177
63	57 Sp0	Fuca1-2Galb1-3GalNAcb1-4(Neu5Aca2-3)Galb1-4Glcb-Sp0	30.25	7.63217	40.25	15.4569	35	2.94392	36.25	11.6154
64	57 Sp9	Fuca1-2Galb1-3GalNAcb1-4(Neu5Aca2-3)Galb1-4Glcb-Sp9	29.75	6.70199	43.75	16.8992	21.5	6.80686	37.75	11.5289
65	58 Sp8	Fuca1-2Galb1-3GlcNAcb1-3Galb1-4Glcb-Sp8	36	6.733	48.5	9.11043	32.5	8.06226	35	5.47723
66	58 Sp10	Fuca1-2Galb1-3GlcNAcb1-3Galb1-4Glcb-Sp10	23.5	12.0692	32.5	15.8008	20.75	7.67572	24.25	5.7373
67	60 Sp0	Fuca1-2Galb1-3GlcNAcb-Sp0	30	6.97615	31	6	34.25	5.5	28.5	3.69685
68	60 Sp8	Fuca1-2Galb1-3GlcNAcb-Sp8	30.75	2.87228	33	3.65148	27.75	6.94622	20.5	2.38048
69	61 Sp0	Fuca1-2Galb1-4(Fuca1-3)GlcNAcb1-3Galb1-4(Fuca1-3)GlcNAcb-Sp0	25.75	2.98608	24.75	5.31507	28	0	24.75	1.25831
70	62 Sp0	Fuca1-2Galb1-4(Fuca1-3)GlcNAcb1-3Galb1-4(Fuca1-3)GlcNAcb1-3Galb1-4(Fuca1-3)GlcNAcb-Sp0	33.25	4.272	31.5	3	33.75	1.70783	30	3.3665
71	64 Sp0	Fuca1-2Galb1-4(Fuca1-3)GlcNAcb-Sp0	29.5	2.64575	26.5	1.73205	23.5	5.50757	19.75	2.87228
72	64 Sp8	Fuca1-2Galb1-4(Fuca1-3)GlcNAcb-Sp8	37.5	5.44671	50	7.87401	45.25	1.25831	76.5	16.9804
73	65 Sp0	Fuca1-2Galb1-4GlcNAcb1-3Galb1-4GlcNAcb-Sp0	30.25	5.25198	33.5	6.55744	24.25	3.0957	49.75	9.21502
74	66 Sp0	Fuca1-2Galb1-4GlcNAcb1-3Galb1-4GlcNAcb1-3Galb1-4GlcNAcb-Sp0	29.25	2.21736	33.5	1.73205	23	5.94418	41.75	4.11299
75	67 Sp0	Fuca1-2Galb1-4GlcNAcb-Sp0	56.5	8.2664	62	9.55685	69.5	47.8086	97	19.4422
76	67 Sp8	Fuca1-2Galb1-4GlcNAcb-Sp8	40.5	1	44	2.70801	33.75	4.42531	52	2.16025
77	68 Sp0	Fuca1-2Galb1-4Glcb-Sp0	35	9.27362	48.75	9.74252	20	15.6631	44.5	7.59386
78	69 Sp8	Fuca1-2Galb-Sp8	51	10.0995	52.75	11.8989	42.25	12.9196	47.5	9.32738
79	70 Sp8	Fuca1-3GlcNAcb-Sp8	32	12.6227	34.5	13.6991	34.5	5.44671	36.5	5.32291
80	72 Sp8	Fuca1-4GlcNAcb-Sp8	29.5	6.35085	30.5	7.32575	30.25	6.44851	32.75	6.94622
81	73 Sp8	Fucb1-3GlcNAcb-Sp8	34.75	12.0934	32.5	10.6301	28.25	8.65544	26.75	6.65207
82	74 Sp0	GalNAca1-3(Fuca1-2)Galb1-3GlcNAcb-Sp0	27	6.97615	27.25	8.46069	22.25	5.12348	22	6.37704
83	75 Sp0	GalNAca1-3(Fuca1-2)Galb1-4(Fuca1-3)GlcNAcb-Sp0	31.75	5.12348	31.25	4.272	36	3.74166	30.25	4.03113
84	76 Sp0	(3S)Galb1-4(Fuca1-3)Glcb-Sp0	42.25	30.8585	72	64.3169	72.5	3.10913	73	5.35413
85	77 Sp0	GalNAca1-3(Fuca1-2)Galb1-4GlcNAcb-Sp0	19.5	6.13732	17.75	4.57347	21.75	3.77492	23.5	2.38048
86	77 Sp8	GalNAca1-3(Fuca1-2)Galb1-4GlcNAcb-Sp8	33.75	1.25831	33.75	6.84957	23.75	1.5	26.25	2.36291
87	78 Sp0	GalNAca1-3(Fuca1-2)Galb1-4Glcb-Sp0	23.25	7.13559	24.25	8.77021	27.25	3.5	24	3.55903
88	79 Sp8	GlcNAcb1-3Galb1-3GalNAca-Sp8	34.75	2.5	43.5	2.38048	29.75	2.98608	37	4.24264
89	80 Sp8	GalNAca1-3(Fuca1-2)Galb-Sp8	32	7.11805	31	2.16025	28.5	3.31662	25.25	2.62996
90	80 Sp18	GalNAca1-3(Fuca1-2)Galb-Sp18	25.75	8.01561	26.75	6.55108	12.75	11.4127	20.25	2.75379
91	81 Sp8	GalNAca1-3GalNAcb-Sp8	38.5	8.96289	39.5	7.93725	34.25	8.4212	31.25	6.89807
92	82 Sp8	GalNAca1-3Galb-Sp8	42	10.583	35.25	11.9548	53	7.34847	47.5	11.8181
93	84 Sp8	GalNAca1-4(Fuca1-2)Galb1-4GlcNAcb-Sp8	28	0.816497	29	4.54606	26	1.41421	24	1.41421
94	85 Sp8	GalNAcb1-3GalNAca-Sp8	29.25	2.36291	24.5	0.57735	23.75	6.70199	19	3.82971
95	86 Sp8	GalNAcb1-3(Fuca1-2)Galb-Sp8	26.25	2.06155	24	2.70801	23.25	3.86221	23.25	4.99166
96	87 Sp0	GalNAcb1-3Gala1-4Galb1-4GlcNAcb-Sp0	29.5	1.29099	25.25	1.5	22.75	2.21736	23	4.08248
97	90 Sp0	GalNAcb1-4(Fuca1-3)GlcNAcb-Sp0	52.75	12.3119	47.75	7.63217	51	4.83046	47	3.26599
98	92 Sp0	GalNAcb1-4GlcNAcb-Sp0	46.5	3.87298	42.5	4.04145	40.5	5.8023	34.75	4.99166
99	92 Sp8	GalNAcb1-4GlcNAcb-Sp8	46	2	43.25	2.21736	41	3.3665	32.75	5.12348
100	93 Sp8	Gala1-2Galb-Sp8	82.25	7.54431	93.5	5.91608	61.25	20.6297	101.25	28.5
101	94 Sp0	Gala1-3(Fuca1-2)Galb1-3GlcNAcb-Sp0	41.25	4.272	38.5	5.8023	38.75	12.0934	58.5	12.3962
102	94 Sp8	Gala1-3(Fuca1-2)Galb1-3GlcNAcb-Sp8	33.5	5.19615	41.5	6.245	38.5	16.2993	112.5	54.8787
103	95 Sp0	Gala1-3(Fuca1-2)Galb1-4(Fuca1-3)GlcNAcb-Sp0	47.75	3.86221	53.25	11.4419	58.25	28.7446	54	3.91578
104	95 Sp8	Gala1-3(Fuca1-2)Galb1-4(Fuca1-3)GlcNAcb-Sp8	28	4.24264	35.25	5.85235	29	5.47723	68.25	9.63933
105	96 Sp0	Gala1-3(Fuca1-2)Galb1-4GlcNAc-Sp0	30	2.94392	35	4.32049	13	10.4243	22.25	12.7377
106	97 Sp0	Gala1-3(Fuca1-2)Galb1-4Glcb-Sp0	30	1.41421	31.25	3.86221	27	6.0553	39	3.4641
107	98 Sp8	Gala1-3(Fuca1-2)Galb-Sp8	221	5.47723	783	126.76	722.75	120.143	706.5	96.8315
108	98 Sp18	Gala1-3(Fuca1-2)Galb-Sp18	31.25	2.5	25.5	3.10913	23.25	5.85235	19	2.82843
109	99 Sp8	Gala1-4(Gala1-3)Galb1-4GlcNAcb-Sp8	24	7.74597	23.25	8.09835	19	8.12404	20.75	5.85235
110	100 Sp8	Gala1-3GalNAca-Sp8	29.5	6.02771	28	5.35413	27.75	8.65544	24.25	7.932
111	100 Sp16	Gala1-3GalNAca-Sp16	26.25	2.98608	27.25	1.25831	21.25	5.90903	26.75	9.17878
112	101 Sp8	Gala1-3GalNAcb-Sp8	43.25	2.75379	43.5	6.40312	38.25	6.5	33.5	2.64575
113	102 Sp8	Gala1-3Galb1-4(Fuca1-3)GlcNAcb-Sp8	35.5	1.29099	34	2.94392	31.75	2.62996	32	2.82843
114	103 Sp0	Gala1-3Galb1-3GlcNAcb-Sp0	31.75	2.87228	32.75	4.64579	23.5	2.38048	26.5	1.91485
115	104 Sp8	Gala1-3Galb1-4GlcNAcb-Sp8	35	7.43864	40.25	6.70199	31	5.16398	35.75	3.59398
116	105 Sp0	Gala1-3Galb1-4Glcb-Sp0	57	1.41421	52.5	4.65475	49.25	8.38153	42	7.16473
117	105 Sp10	Gala1-3Galb1-4Glc-Sp10	33.25	10.8436	54.25	10.7819	4.25	1.25831	21.75	10.7199
118	106 Sp8	Gala1-3Galb-Sp8	46.75	1.25831	46.75	6.80074	34.5	6.35085	36.25	0.957427
119	107 Sp8	Gala1-4(Fuca1-2)Galb1-4GlcNAcb-Sp8	32.75	0.957427	28.5	3.10913	22.75	5.5	22	2.82843
120	108 Sp0	Gala1-4Galb1-4GlcNAcb-Sp0	25.5	2.08167	19.5	2.38048	23.5	4.3589	19.5	3.41565
121	108 Sp8	Gala1-4Galb1-4GlcNAcb-Sp8	43.5	3.10913	37.75	2.5	39.25	7.27438	34.75	5.67891
122	109 Sp0	Gala1-4Galb1-4Glcb-Sp0	36.75	15.5858	31.25	13.2004	34	14.5373	27.75	6.99405
123	110 Sp8	Gala1-4GlcNAcb-Sp8	65.5	5.19615	78	9.4163	71.25	10.2103	77.25	12.6853
124	111 Sp8	Gala1-6Glcb-Sp8	57	20.1825	65.75	28.8603	79.25	25.1578	144.75	34.7886
125	112 Sp8	Galb1-2Galb-Sp8	72.75	0.957427	78.75	6.70199	42.25	18.4278	85.5	37.2245
126	113 Sp0	Galb1-3(Fuca1-4)GlcNAcb1-3Galb1-4(Fuca1-3)GlcNAcb-Sp0	32	3.55903	40.25	3.77492	31	12.1929	29.5	10.6615
127	114 Sp0	Galb1-3GlcNAcb1-3Galb1-4(Fuca1-3)GlcNAcb-Sp0	22.5	3.51188	26.5	6.245	21.5	1.91485	26.75	8.8459
128	115 Sp0	Galb1-3(Fuca1-4)GlcNAc-Sp0	44.25	5.43906	55	4.08248	25.75	10.7199	42.5	3
129	115 Sp8	Galb1-3(Fuca1-4)GlcNAc-Sp8	34	4.96655	34	4.69042	29.75	5.56028	36.75	4.57347
130	116 Sp8	Fuca1-4(Galb1-3)GlcNAcb-Sp8	38.25	2.98608	42.75	2.62996	35.25	10.9659	30.25	4.5
131	119 Sp8	Galb1-4GlcNAcb1-6GalNAca-Sp8	24.5	4.93288	20.25	4.42531	25.5	3.87298	19.75	5.85235
132	119 Sp14	Galb1-4GlcNAcb1-6GalNAc-Sp14	31.5	2.08167	29.25	1.70783	26	6.0553	25.25	1.25831
133	120 Sp8	GlcNAcb1-6(Galb1-3)GalNAca-Sp8	626	75.0644	1284.5	193.511	102	7.48331	186	10.8012
134	121 Sp8	Neu5Aca2-6(Galb1-3)GalNAca-Sp8	34.5	10.247	41.5	13.3791	31	7.78888	44.25	16.7804
135	121 Sp14	Neu5Aca2-6(Galb1-3)GalNAca-Sp14	30.75	3.77492	46.5	13.6991	20.75	9.17878	20	5.83095
136	122 Sp8	Neu5Acb2-6(Galb1-3)GalNAca-Sp8	21.25	3.77492	19.75	4.03113	21.75	0.957427	20	2.58199
137	123 Sp10	Neu5Aca2-6(Galb1-3)GlcNAcb1-4Galb1-4Glcb-Sp10	23.5	5.91608	36.5	8.85061	33.75	2.62996	51.5	7.23418
138	126 Sp8	Galb1-3GalNAca-Sp8	87.75	20.0562	596.25	47.7869	28.25	3.40343	51.5	5.8023
139	126 Sp14	Galb1-3GalNAca-Sp14	15.75	9.39415	25.25	16.2967	6.25	6.13052	25.5	4.04145
140	126 Sp16	Galb1-3GalNAca-Sp16	134.75	34.4129	533.25	117.159	59.75	7.22842	96.25	5.18813
141	127 Sp8	Galb1-3GalNAcb-Sp8	48.25	8.18026	70.75	19.0504	21.75	14.3846	20	13.4907
142	128 Sp0	Galb1-3GalNAcb1-3Gala1-4Galb1-4Glcb-Sp0	21.25	3.20156	18.75	4.57347	17	6.16441	11.5	2.64575
143	129 Sp0	Galb1-3GalNAcb1-4(Neu5Aca2-3)Galb1-4Glcb-Sp0	22.75	2.5	20.5	0.57735	22.25	3.59398	15	4.89898
144	130 Sp8	Galb1-3GalNAcb1-4Galb1-4Glcb-Sp8	82.75	5.56028	78.5	13.5277	42.25	4.272	35.25	3.40343
145	131 Sp8	Galb1-3Galb-Sp8	83.25	4.99166	253.25	27.6451	64.75	17.557	163.5	10.4722
146	132 Sp0	Galb1-3GlcNAcb1-3Galb1-4GlcNAcb-Sp0	21.25	5.7373	28.5	2.88675	23.75	7.27438	44.25	6.70199
147	133 Sp10	Galb1-3GlcNAcb1-3Galb1-4Glcb-Sp10	33.5	1.29099	51	4.96655	35	2.16025	60	3.74166
148	134 Sp0	Galb1-3GlcNAcb-Sp0	41.25	2.36291	48.75	5.5	62.25	16.8399	88.25	33.2303
149	134 Sp8	Galb1-3GlcNAcb-Sp8	60.5	6.75771	70.5	8.06226	60.25	1.5	71.5	2.64575
150	136 Sp0	Galb1-4(Fuca1-3)GlcNAcb-Sp0	41.25	2.98608	45.5	5	20.5	12.0692	29.75	14.1745
151	136 Sp8	Galb1-4(Fuca1-3)GlcNAcb-Sp8	27.75	5.12348	28	6.32456	31.25	7.04154	33.25	2.21736
152	137 Sp0	Galb1-4(Fuca1-3)GlcNAcb1-3Galb1-4(Fuca1-3)GlcNAcb-Sp0	39.75	1.25831	44.75	2.87228	38.75	1.70783	36.5	3.69685
153	138 Sp0	Galb1-4(Fuca1-3)GlcNAcb1-3Galb1-4(Fuca1-3)GlcNAcb1-3Galb1-4(Fuca1-3)GlcNAcb-Sp0	17.75	4.57347	17.75	2.06155	17	4.24264	11.25	1.70783
154	140 Sp0	Galb1-4(6S)Glcb-Sp0	50.75	4.99166	45.5	5.25991	18.5	13.404	30.5	3.78594
155	140 Sp8	Galb1-4(6S)Glcb-Sp8	62.5	3.10913	56.75	4.11299	56.25	13.9613	60.5	16.7631
156	141 Sp8	Galb1-4GalNAca1-3(Fuca1-2)Galb1-4GlcNAcb-Sp8	35.5	2.08167	37	1.82574	33	1.41421	39.25	0.5
157	142 Sp8	Galb1-4GalNAcb1-3(Fuca1-2)Galb1-4GlcNAcb-Sp8	31	5.22813	36.75	4.92443	25.5	2.38048	25.75	2.21736
158	144 Sp8	Galb1-4GlcNAcb1-3GalNAca-Sp8	29.75	4.99166	33.75	5.85235	41.5	8.73689	45	11.0454
159	144 Sp14	Galb1-4GlcNAcb1-3GalNAc-Sp14	23	6	31.25	8.26136	13.75	7.45542	21	11.6333
160	145 Sp0	Galb1-4GlcNAcb1-3Galb1-4(Fuca1-3)GlcNAcb1-3Galb1-4(Fuca1-3)GlcNAcb-Sp0	28.75	1.70783	31	5.16398	20.25	2.75379	30.5	4.50925
161	146 Sp0	Galb1-4GlcNAcb1-3Galb1-4GlcNAcb1-3Galb1-4GlcNAcb-Sp0	17.75	4.272	20.5	6.75771	19.25	0.957427	20.75	2.87228
162	147 Sp0	Galb1-4GlcNAcb1-3Galb1-4GlcNAcb-Sp0	29.5	1.29099	30	2.16025	16.25	5.12348	14.5	5.91608
163	148 Sp0	Galb1-4GlcNAcb1-3Galb1-4Glcb-Sp0	14.5	6.13732	12.75	4.272	17.5	9.39858	11.75	4.42531
164	148 Sp8	Galb1-4GlcNAcb1-3Galb1-4Glcb-Sp8	23	2.44949	22	3.16228	26.5	11.2398	25.25	7.67572
165	152 Sp8	Galb1-4GlcNAcb1-6(Galb1-3)GalNAca-Sp8	1274	59.6992	3128.25	291.741	245.5	16.7631	280	9.55685
166	152 Sp14	Galb1-4GlcNAcb1-6(Galb1-3)GalNAc-Sp14	60.25	9.84463	188	42.6693	83	4.54606	76.5	3.87298
167	153 Sp0	Galb1-4GlcNAcb-Sp0	44.25	10.3078	40.75	9.63933	39.25	6.70199	35	4.24264
168	153 Sp8	Galb1-4GlcNAcb-Sp8	63.5	13.1276	60.75	11.3541	54.25	5.56028	68.5	7.54983
169	153Sp23	Galb1-4GlcNAcb-Sp23	43.25	2.62996	49.75	9.94569	53	22.6127	184	44.3095
170	154 Sp0	Galb1-4Glcb-Sp0	59.5	4.79583	71	6.37704	57.25	5.90903	82.75	10.6262
171	154 Sp8	Galb1-4Glcb-Sp8	52	15.8745	75	24.4268	89	24.98	107.25	39.424
172	155 Sp8	GlcNAca1-3Galb1-4GlcNAcb-Sp8	29.75	7.41058	33	8.83176	24.75	4.42531	36.75	5.12348
173	156 Sp8	GlcNAca1-6Galb1-4GlcNAcb-Sp8	27.5	4.93288	28.75	4.272	17.75	1.70783	30.5	6.13732
174	158 Sp8	GlcNAcb1-2Galb1-3GalNAca-Sp8	23.5	4.12311	26	5.47723	23.25	1.5	28	6.16441
175	159 Sp8	GlcNAcb1-6(GlcNAcb1-3)GalNAca-Sp8	24.25	3.86221	21.25	3.5	21	8.7178	17.25	7.80491
176	159 Sp14	GlcNAcb1-6(GlcNAcb1-3)GalNAca-Sp14	13.5	2.64575	10.75	0.957427	17.75	5.61991	18.5	3.10913
177	161 Sp8	GlcNAcb1-6(GlcNAcb1-3)Galb1-4GlcNAcb-Sp8	21.25	3.59398	19.5	7.72442	12.25	2.62996	13.5	1
178	162 Sp8	GlcNAcb1-3GalNAca-Sp8	26	6.68331	21.5	3.41565	27.25	2.21736	21.75	2.62996
179	162 Sp14	GlcNAcb1-3GalNAca-Sp14	25	4.76095	29.5	6.35085	31.5	5.44671	41	4.24264
180	163 Sp8	GlcNAcb1-3Galb-Sp8	45.75	7.22842	45.25	3.86221	35	9.4163	33.75	7.36546
181	164 Sp0	GlcNAcb1-3Galb1-4GlcNAcb-Sp0	25.25	4.11299	26.25	2.62996	25.75	2.98608	33	4.54606
182	164 Sp8	GlcNAcb1-3Galb1-4GlcNAcb-Sp8	20.25	3.0957	16.25	0.957427	9.75	1.70783	11.5	1.29099
183	165 Sp0	GlcNAcb1-3Galb1-4GlcNAcb1-3Galb1-4GlcNAcb-Sp0	22.75	2.98608	20.5	2.64575	11.75	1.70783	18	5.47723
184	166 Sp0	GlcNAcb1-3Galb1-4Glcb-Sp0	30	4.16333	32.75	1.70783	22	2	24.25	5.96518
185	167 MDPLys	GlcNAcb1-4-MDPLys	25.75	6.55108	29.5	9.25563	30.5	0.57735	29.25	2.06155
186	168 Sp8	GlcNAcb1-6(GlcNAcb1-4)GalNAca-Sp8	26.5	4.12311	30.25	5.90903	30.25	4.19325	23.5	2.38048
187	169 Sp8	GlcNAcb1-4Galb1-4GlcNAcb-Sp8	30.75	3.30404	29	2	20	6.97615	22	4.24264
188	170 Sp8	GlcNAcb1-4GlcNAcb1-4GlcNAcb1-4GlcNAcb1-4GlcNAcb1-4GlcNAcb1-Sp8	29.5	9.46925	34.5	13.5277	21.25	4.57347	20.5	6.13732
189	171 Sp8	GlcNAcb1-4GlcNAcb1-4GlcNAcb1-4GlcNAcb1-4GlcNAcb1-Sp8	14.75	6.13052	15	5.35413	18.5	4.12311	18.25	2.21736
190	173 Sp8	GlcNAcb1-4GlcNAcb1-4GlcNAcb-Sp8	17.5	6.245	17.75	2.98608	21.75	7.36546	17.25	4.99166
191	176 Sp8	GlcNAcb1-6GalNAca-Sp8	34	6.48074	30.75	6.0208	30.25	4.19325	24	1.82574
192	176 Sp14	GlcNAcb1-6GalNAca-Sp14	23.25	3.77492	19	2.58199	24.5	1.91485	19.75	3.0957
193	177 Sp8	GlcNAcb1-6Galb1-4GlcNAcb-Sp8	30	9.05539	25	6.63325	29	6.37704	23.25	2.5
194	178 Sp8	Glca1-4Glcb-Sp8	71.25	5.18813	63.5	2.38048	52	24.2487	38.75	17.8955
195	179 Sp8	Glca1-4Glca-Sp8	41	2.70801	60.75	4.57347	43.75	14.8183	101.25	20.4675
196	180 Sp8	Glca1-6Glca1-6Glcb-Sp8	45.25	9.14239	65	11.6333	49.5	27.7308	109.25	37.9594
197	181 Sp8	Glcb1-4Glcb-Sp8	70.5	7	140.75	11.471	92.25	4.11299	221.75	24.4182
198	182 Sp8	Glcb1-6Glcb-Sp8	72.75	5.37742	124.5	14.3875	68.25	14.66	104.75	18.2825
199	183 Sp8	G-ol-Sp8	28.25	11.1168	34	15.5134	36.75	11.8427	40.75	9.32291
200	184 Sp8	GlcAa-Sp8	56	21.3698	70.75	25.224	85.75	10.0457	70.5	6.60808
201	185 Sp8	GlcAb-Sp8	91.25	13.2508	282.75	22.9111	249	62.7535	275.25	74.7323
202	186 Sp8	GlcAb1-3Galb-Sp8	47.5	10.6615	75	11.2842	58.25	15.7771	65.5	17.4069
203	187 Sp8	GlcAb1-6Galb-Sp8	43	10.4881	40.5	11.7047	42.75	28.6516	67	21.9241
204	188 Sp0	KDNa2-3Galb1-3GlcNAcb-Sp0	26.5	1.91485	22.75	2.75379	18.25	5.61991	12.75	5.12348
205	189 Sp0	KDNa2-3Galb1-4GlcNAcb-Sp0	26.5	5	22	2.94392	25.75	2.36291	28.25	2.62996
206	190 Sp9	Mana1-2Mana1-2Mana1-3Mana-Sp9	66.75	8.65544	91.25	16.7606	44.75	8.77021	94.5	16.1761
207	191 Sp9	Mana1-2Mana1-6(Mana1-2Mana1-3)Mana-Sp9	29	4.16333	28	2.70801	29.5	1	27.75	5.5
208	192 Sp9	Mana1-2Mana1-3Mana-Sp9	43.75	1.25831	49.75	4.34933	39.25	4.99166	45.75	4.34933
209	199 Sp9	Mana1-6(Mana1-3)Mana-Sp9	31	3.74166	31	3.91578	33.75	2.5	28	6.68331
210	200 Sp9	Mana1-2Mana1-2Mana1-6(Mana1-3)Mana-Sp9	20.25	3.30404	19	2.82843	16.75	6.39661	14.75	8.22091
211	203 Sp12	Mana1-6(Mana1-3)Mana1-6(Mana1-2Mana1-3)Manb1-4GlcNAcb1-4GlcNAcb-Sp12	20.5	1.91485	19	2.82843	13.5	9.46925	9.5	6.40312
212	205 Sp12	Mana1-6(Mana1-3)Mana1-6(Mana1-3)Manb1-4GlcNAcb1-4GlcNAcb-Sp12	22.75	4.34933	20	3.4641	19.75	5.43906	15	2.58199
213	208 Sp0	Manb1-4GlcNAcb-Sp0	26.5	7.04746	25	4.96655	25.75	3.30404	19.5	1.73205
214	210 Sp0	Neu5Aca2-3Galb1-4GlcNAcb1-3Galb1-4(Fuca1-3)GlcNAcb-Sp0	18.5	7.04746	15.25	3.59398	80	92.7182	36.25	15.8193
215	211 Sp8	(3S)Galb1-4(Fuca1-3)(6S)GlcNAcb-Sp8	56	1.1547	64.25	4.272	57.5	9.81495	124	18.5652
216	212 Sp0	Fuca1-2(6S)Galb1-4GlcNAcb-Sp0	46.5	7.93725	49.25	9.81071	41.5	7.23418	61.25	5.18813
217	213 Sp8	Fuca1-2Galb1-4(6S)GlcNAcb-Sp8	45.25	8.26136	63.25	15.9034	46.5	13.9881	78.5	16.6233
218	216 Sp0	Fuca1-2(6S)Galb1-4(6S)Glcb-Sp0	73.25	5.90903	92.25	11.0868	136.75	72.7937	170.5	76.3086
219	220 Sp8	Neu5Aca2-3Galb1-3GalNAca-Sp8	29.75	0.957427	31	2.16025	80.25	9.53502	173.75	16.7606
220	220 Sp14	Neu5Aca2-3Galb1-3GalNAca-Sp14	22.5	3	19.25	1.5	22.25	0.5	36.5	3.69685
221	221 Sp0	GalNAcb1-4(Neu5Aca2-8Neu5Aca2-8Neu5Aca2-8Neu5Aca2-3)Galb1-4Glcb-Sp0	24.5	6.55744	20.5	1.73205	24.5	4.65475	35.5	5.91608
222	223 Sp0	GalNAcb1-4(Neu5Aca2-8Neu5Aca2-8Neu5Aca2-3)Galb1-4Glcb-Sp0	11.25	4.19325	11.5	2.51661	14.5	5	9.25	1.5
223	224 Sp0	Neu5Aca2-8Neu5Aca2-8Neu5Aca2-3Galb1-4Glcb-Sp0	22	2	16.25	2.5	16	5.71548	17.25	8.69387
224	225 Sp0	GalNAcb1-4(Neu5Aca2-8Neu5Aca2-3)Galb1-4Glcb-Sp0	11.25	3.20156	10.5	1.91485	12.25	2.5	11	1.41421
225	227 Sp8	Neu5Aca2-8Neu5Aca2-8Neu5Aca-Sp8	23	2.44949	20.75	2.5	22	0.816497	24.5	3.31662
226	230 Sp0	GalNAcb1-4(Neu5Aca2-3)Galb1-4GlcNAcb-Sp0	31	3.3665	27.75	1.89297	26.5	4.43471	24.5	2.64575
227	230 Sp8	GalNAcb1-4(Neu5Aca2-3)Galb1-4GlcNAcb-Sp8	35.75	3.59398	39.25	6.39661	21	2.44949	25.75	1.5
228	231 Sp0	GalNAcb1-4(Neu5Aca2-3)Galb1-4Glcb-Sp0	18.25	4.71699	18.25	6.18466	21.5	3	22.25	6.07591
229	232 Sp0	Neu5Aca2-3Galb1-3GalNAcb1-4(Neu5Aca2-3)Galb1-4Glcb-Sp0	20	3.82971	19.5	3.41565	20.5	2.38048	27.5	3.69685
230	233 Sp8	Neu5Aca2-6(Neu5Aca2-3)GalNAca-Sp8	26.75	5.12348	26.25	8.53913	25	4.16333	24.25	2.21736
231	234 Sp8	Neu5Aca2-3GalNAca-Sp8	35.5	5.74456	33	4.83046	30.25	0.957427	27	3.55903
232	235 Sp0	Neu5Aca2-3GalNAcb1-4GlcNAcb-Sp0	22.5	1.91485	17	2.16025	18	4.24264	11	3.3665
233	236 Sp8	Neu5Aca2-3Galb1-3(6S)GlcNAc-Sp8	28.75	8.22091	25.25	4.5	29.75	10.7199	24.75	8.95824
234	237 Sp8	Neu5Aca2-3Galb1-3(Fuca1-4)GlcNAcb-Sp8	20.5	5.25991	20.75	1.89297	19.25	3.77492	15.25	0.5
235	238 Sp0	Neu5Aca2-3Galb1-3(Fuca1-4)GlcNAcb1-3Galb1-4(Fuca1-3)GlcNAcb-Sp0	26.5	2.38048	23.25	1.70783	29.25	0.957427	28	3.55903
236	240 Sp8	Neu5Aca2-3Galb1-4(Neu5Aca2-3Galb1-3)GlcNAcb-Sp8	29.75	4.99166	16.75	3.5	17.25	2.62996	16.5	1.73205
237	243 Sp8	Neu5Aca2-3Galb1-3(6S)GalNAca-Sp8	146	18.7439	414.25	58.0481	1265.5	71.7101	16397	599.29
238	244 Sp8	Neu5Aca2-6(Neu5Aca2-3Galb1-3)GalNAca-Sp8	32	4.69042	35.25	4.34933	28.25	4.57347	55.5	4.50925
239	244 Sp14	Neu5Aca2-6(Neu5Aca2-3Galb1-3)GalNAca-Sp14	34	0.816497	44.25	2.98608	29.75	5.5	97	18.9737
240	245 Sp8	Neu5Aca2-3Galb-Sp8	36.5	5.06623	55.5	11.2694	42.25	7.88987	59.75	8.5
241	246 Sp0	Neu5Aca2-3Galb1-3GalNAcb1-3Gala1-4Galb1-4Glcb-Sp0	19.75	6.70199	21	3.55903	35.5	11.5614	30.75	1.89297
242	247 Sp0	Neu5Aca2-3Galb1-3GlcNAcb1-3Galb1-4GlcNAcb-Sp0	15	3.4641	16.25	4.85627	15.5	1.29099	14.5	2.38048
243	248 Sp0	Fuca1-2(6S)Galb1-4Glcb-Sp0	41.25	2.5	40.75	6.80074	30.25	18.6257	21	13.8323
244	249 Sp0	Neu5Aca2-3Galb1-3GlcNAcb-Sp0	50	3.4641	47.25	2.36291	41.25	3.0957	37.5	2.38048
245	250 Sp8	Neu5Aca2-3Galb1-4(6S)GlcNAcb-Sp8	30.75	2.06155	22.25	2.75379	25.5	6.245	25.5	7.72442
246	251 Sp8	Neu5Aca2-3Galb1-4(Fuca1-3)(6S)GlcNAcb-Sp8	29	1.82574	20	3.82971	27.25	9.67385	22.25	7.88987
247	252 Sp0	Neu5Aca2-3Galb1-4(Fuca1-3)GlcNAcb1-3Galb1-4(Fuca1-3)GlcNAcb1-3Galb1-4(Fuca1-3)GlcNAcb-Sp0	54.75	4.11299	60.75	5.96518	43.25	4.42531	48	3.74166
248	253 Sp0	Neu5Aca2-3Galb1-4(Fuca1-3)GlcNAcb-Sp0	26.75	1.89297	24.75	3.5	28	1.1547	27	0.816497
249	253 Sp8	Neu5Aca2-3Galb1-4(Fuca1-3)GlcNAcb-Sp8	31	5.2915	29.25	6.89807	27.25	4.19325	23.75	3.20156
250	254 Sp8	Neu5Aca2-3Galb1-4(Fuca1-3)GlcNAcb1-3Galb-Sp8	18.25	2.62996	18	1.82574	21	2.70801	12.75	0.957427
251	255 Sp8	Neu5Aca2-3Galb1-4(Fuca1-3)GlcNAcb1-3Galb1-4GlcNAcb-Sp8	43.5	1.91485	43	4.24264	41	4.24264	44.5	3.69685
252	257 Sp0	Neu5Aca2-3Galb1-4GlcNAcb1-3Galb1-4GlcNAcb1-3Galb1-4GlcNAcb-Sp0	15.5	2.88675	15.5	1.73205	15.25	4.57347	13.75	1.89297
253	258 Sp0	Neu5Aca2-3Galb1-4GlcNAcb-Sp0	34.25	6.55108	30.5	5.56776	27.75	6.23832	25.5	2.38048
254	258 Sp8	Neu5Aca2-3Galb1-4GlcNAcb-Sp8	21.25	5.56028	18	3.26599	15.75	3.40343	13.75	5.12348
255	259 Sp0	Neu5Aca2-3Galb1-4GlcNAcb1-3Galb1-4GlcNAcb-Sp0	16	2.94392	14.5	1	13.25	1.70783	11	2.16025
256	260 Sp0	Fuca1-2Galb1-4(6S)Glcb-Sp0	36.75	6.94622	39	9.34523	37.25	12.1758	28.5	6.75771
257	261 Sp0	Neu5Aca2-3Galb1-4Glcb-Sp0	40.5	9.32738	35.25	7.932	30.5	3.10913	27	2.16025
258	261 Sp8	Neu5Aca2-3Galb1-4Glcb-Sp8	32.75	6.99405	30	4.76095	36	8.90693	39	2.94392
259	263 Sp8	Neu5Aca2-6GalNAca-Sp8	52.25	5.12348	58	8.0829	38.75	7.45542	55.25	6.13052
260	264 Sp0	Neu5Aca2-6GalNAcb1-4GlcNAcb-Sp0	60.75	53.2877	30.75	4.03113	25	1.82574	37.25	2.21736
261	267 Sp8	Neu5Aca2-6Galb1-4(6S)GlcNAcb-Sp8	45.75	10.7199	55.75	3.40343	29.5	6.245	82.75	24.8244
262	268 Sp8	Neu5Aca2-6Galb1-4GlcNAcb-Sp8	30.75	8.65544	31.25	9.87843	31	8.12404	22	2.82843
263	269 Sp0	Neu5Aca2-6Galb1-4GlcNAcb1-3Galb1-4(Fuca1-3)GlcNAcb1-3Galb1-4(Fuca1-3)GlcNAcb-Sp0	24.25	6.94622	23	7.34847	23.25	1.5	22.5	1
264	270 Sp0	Neu5Aca2-6Galb1-4GlcNAcb1-3Galb1-4GlcNAcb-Sp0	22.75	3.59398	16.25	1.25831	36.25	10.9049	21	6.16441
265	271 Sp0	Neu5Aca2-6Galb1-4Glcb-Sp0	25.75	2.87228	24.5	2.64575	23	6.68331	18.75	3.5
266	271 Sp8	Neu5Aca2-6Galb1-4Glcb-Sp8	37	5.47723	40.75	7.18215	61.5	14.6173	58.5	2.88675
267	272 Sp8	Neu5Aca2-6Galb-Sp8	41	7.34847	37.25	3.5	26	3.74166	27	4.96655
268	273 Sp8	Neu5Aca2-8Neu5Aca-Sp8	35.25	1.70783	29	3.55903	35.5	12.7671	29.5	8.18535
269	274 Sp0	Neu5Aca2-8Neu5Aca2-3Galb1-4Glcb-Sp0	35.5	11.8181	40	13.7113	20.25	2.21736	23	2.58199
270	275 Sp0	Galb1-3(Fuca1-4)GlcNAcb1-3Galb1-3(Fuca1-4)GlcNAcb-Sp0	33.25	4.99166	33.75	4.42531	37.25	1.5	31.75	1.70783
271	277 Sp8	Neu5Acb2-6GalNAca-Sp8	39	4.16333	37.75	4.11299	31.5	3.10913	35.25	7.08872
272	278 Sp8	Neu5Acb2-6Galb1-4GlcNAcb-Sp8	27.25	3.86221	26.25	3.86221	26.5	3.31662	24.25	3.59398
273	280 Sp0	Neu5Gca2-3Galb1-3(Fuca1-4)GlcNAcb-Sp0	25.25	3.59398	32	3.4641	27.5	1.29099	37	3.65148
274	281 Sp0	Neu5Gca2-3Galb1-3GlcNAcb-Sp0	41.5	4.65475	59.75	10.9049	32	8.04156	74.5	13.6991
275	282 Sp0	Neu5Gca2-3Galb1-4(Fuca1-3)GlcNAcb-Sp0	31.25	2.62996	30	0.816497	28	1.1547	31.25	1.5
276	283 Sp0	Neu5Gca2-3Galb1-4GlcNAcb-Sp0	26	3.65148	26	4.54606	24	2.58199	26.25	5.43906
277	284 Sp0	Neu5Gca2-3Galb1-4Glcb-Sp0	31.5	11.3871	34.25	10.751	37	8.44591	42.25	11.3248
278	285 Sp0	Neu5Gca2-6GalNAca-Sp0	38.25	8.65544	36	2.44949	20.25	2.5	19	4.54606
279	286 Sp0	Neu5Gca2-6Galb1-4GlcNAcb-Sp0	27	2.58199	26.75	2.62996	29	1.82574	25.75	1.70783
280	287 Sp8	Neu5Gca-Sp8	98.75	4.85627	99	4.16333	73.75	23.3577	53.25	13.326
281	295 Sp14	Neu5Aca2-3Galb1-4GlcNAcb1-6(Galb1-3)GalNAca-Sp14	41.75	9.56992	72.5	23.9653	26.5	2.64575	26.25	0.957427
282	297 Sp0	Galb1-3GlcNAcb1-3Galb1-3GlcNAcb-Sp0	16.5	4.79583	13.75	4.34933	15	2.94392	13.75	4.34933
283	298 Sp0	Galb1-4(Fuca1-3)(6S)GlcNAcb-Sp0	49	8.98146	40.75	6.60177	43.25	4.34933	35	4.08248
284	299 Sp0	Galb1-4(Fuca1-3)(6S)Glcb-Sp0	49.5	4.79583	43	2.94392	57.5	12.7932	39	6.21825
285	300 Sp0	Galb1-4(Fuca1-3)GlcNAcb1-3Galb1-3(Fuca1-4)GlcNAcb-Sp0	29	3.4641	33.25	2.06155	29	4.69042	26	4.08248
286	301 Sp0	Galb1-4GlcNAcb1-3Galb1-3GlcNAcb-Sp0	29	3.16228	34.75	4.5	25	2.82843	22.5	2.64575
287	302 Sp0	Neu5Aca2-3Galb1-3GlcNAcb1-3Galb1-3GlcNAcb-Sp0	16.25	4.5	16	2.82843	16	2.94392	11.5	3.31662
288	303 Sp0	Neu5Aca2-3Galb1-4GlcNAcb1-3Galb1-3GlcNAcb-Sp0	13.75	9.32291	10.5	3.87298	13.75	4.5	14	2.82843
289	305 Sp0	4S(3S)Galb1-4GlcNAcb-Sp0	47.75	6.07591	54.5	11.2101	36.25	12.842	36.25	6.94622
290	306 Sp0	(6S)Galb1-4(6S)GlcNAcb-Sp0	50.75	5.18813	51	3.74166	44	5.47723	44.75	3.59398
291	307 Sp10	(6P)Glcb-Sp10	38.75	10.9659	55.25	27.0355	71.75	19.9896	63.75	11.3248
292	312 Sp8	Galb1-3Galb1-4GlcNAcb-Sp8	22.75	3.77492	24.5	2.88675	19.25	4.5	22.5	4.3589
293	313 Sp12	Neu5Aca2-6Galb1-4GlcNAcb1-2Mana1-6(Galb1-4GlcNAcb1-2Mana1-3)Manb1-4GlcNAcb1-4GlcNAcb-Sp12	16	2.16025	13.75	3.0957	14.75	1.70783	12.5	1.91485
294	314 Sp0	Galb1-4GlcNAcb1-6(Galb1-4GlcNAcb1-3)Galb1-4GlcNAc-Sp0	15.75	3.77492	15	1.41421	12.75	2.36291	9.5	1.91485
295	315 Sp0	GlcNAcb1-6(Galb1-4GlcNAcb1-3)Galb1-4GlcNAc-Sp0	22.75	3.40343	24.25	2.75379	24	1.82574	25.5	4.04145
296	316 Sp0	Galb1-4GlcNAca1-6Galb1-4GlcNAcb-Sp0	27.25	3.30404	27.75	2.75379	10.25	3.30404	18	13.4907
297	317 Sp0	Galb1-4GlcNAcb1-6Galb1-4GlcNAcb-Sp0	24	1.41421	23.25	1.70783	22.5	4.20317	25	4.83046
298	320 Sp8	GalNAcb1-3Galb-Sp8	36.25	4.272	44.5	1.73205	30	4.76095	31.5	10.9697
299	321 Sp8	GlcAb1-3GlcNAcb-Sp8	40	5.03322	44.75	5.90903	43.5	7.72442	61.5	7.85281
300	322 Sp12	Neu5Aca2-6Galb1-4GlcNAcb1-2Mana1-6(GlcNAcb1-2Mana1-3)Manb1-4GlcNAcb1-4GlcNAcb-Sp12	22	4.24264	25.5	3.41565	33	9.89949	25.25	4.03113
301	324 Sp10	GlcNAcb1-3Man-Sp10	32.5	3.69685	32.25	2.98608	38	11.1056	34.25	9.03235
302	325 Sp10	GlcNAcb1-4GlcNAcb-Sp10	17.25	5.5	13.5	4.12311	13	9.89949	11.75	8.73212
303	325 Sp12	GlcNAcb1-4GlcNAcb-Sp12	14.75	4.34933	13.25	6.94622	16.75	4.57347	15.25	6.65207
304	327 Sp10	MurNAcb1-4GlcNAcb-Sp10	19.5	5	16.5	4.65475	24.25	1.5	16.5	4.72582
305	329 Sp10	Mana1-6Manb-Sp10	54	3.3665	52.75	2.06155	43.25	7.63217	37	5.47723
306	330 Sp10	Mana1-6(Mana1-3)Mana1-6(Mana1-3)Manb-Sp10	24.75	13.048	21.5	13.4784	18.5	4.79583	11.5	4.12311
307	331 Sp9	Mana1-2Mana1-6(Mana1-3)Mana1-6(Mana1-2Mana1-2Mana1-3)Mana-Sp9	23	3.82971	28.75	2.75379	18	6.37704	18.5	8.58293
308	332 Sp9	Mana1-2Mana1-6(Mana1-2Mana1-3)Mana1-6(Mana1-2Mana1-2Mana1-3)Mana-Sp9	18.75	5.90903	24.25	6.39661	14.25	4.57347	12.25	6.13052
309	333 Sp14	Neu5Aca2-3Galb1-4GlcNAcb1-6(Neu5Aca2-3Galb1-3)GalNAca-Sp14	25.5	5.44671	51.25	12.6853	93	4.54606	206.25	13.7447
310	336 Sp12	Neu5Aca2-6Galb1-4GlcNAcb1-2Mana1-6(Neu5Aca2-3Galb1-4GlcNAcb1-2Mana1-3)Manb1-4GlcNAcb1-4GlcNAcb-Sp12	13.5	4.72582	14.75	3.86221	18.25	3.30404	14.75	3.77492
311	337 Sp12	Galb1-4GlcNAcb1-2Mana1-6(Neu5Aca2-6Galb1-4GlcNAcb1-2Mana1-3)Manb1-4GlcNAcb1-4GlcNAcb-Sp12	22.25	2.75379	32.25	8.61684	19	4.24264	16.5	2.88675
312	341 Sp8	Neu5Aca2-8Neu5Aca2-8Neu5Acb-Sp8	13.5	2.88675	11.5	2.51661	12.5	3.87298	10.5	2.38048
313	342 Sp8	Neu5Gcb2-6Galb1-4GlcNAc-Sp8	55	5.88784	48.25	8.22091	52.5	14.5488	44	7.43864
314	343 Sp19	Galb1-3GlcNAcb1-2Mana1-6(Galb1-3GlcNAcb1-2Mana1-3)Manb1-4GlcNAcb1-4GlcNAcb-Sp19	33.25	3.5	28	4.08248	23.5	4.20317	21.5	2.88675
315	345 Sp12	Neu5Aca2-3Galb1-4GlcNAcb1-2Mana1-6(Neu5Aca2-3Galb1-4GlcNAcb1-2Mana1-3)Manb1-4GlcNAcb1-4GlcNAcb-Sp12	30.25	5.18813	37.75	4.78714	26	6.16441	27.75	8.92095
316	346 Sp12	Neu5Aca2-3Galb1-4GlcNAcb1-2Mana1-6(Neu5Aca2-6Galb1-4GlcNAcb1-2Mana1-3)Manb1-4GlcNAcb1-4GlcNAcb-Sp12	20.25	1.5	27.75	3.86221	20.5	1.91485	60.75	6.39661
317	347 Sp20	Galb1-4(Fuca1-3)GlcNAcb1-2Mana1-6(Galb1-4(Fuca1-3)GlcNAcb1-2Mana1-3)Manb1-4GlcNAcb1-4GlcNAcb-Sp20	29.25	5.61991	42.25	2.5	29.25	7.27438	62.75	12.0381
318	351 Sp0	Neu5,9Ac2a2-3Galb1-3GlcNAcb-Sp0	20.5	4.43471	20	2.58199	87.25	119.995	20.25	3.30404
319	352 Sp0	Neu5Aca2-6Galb1-4GlcNAcb1-3Galb1-3GlcNAcb-Sp0	22	0.816497	20.5	1.91485	17.75	5.43906	16.25	4.34933
320	353 Sp0	Neu5Aca2-3Galb1-3(Fuca1-4)GlcNAcb1-3Galb1-3(Fuca1-4)GlcNAcb-Sp0	33.25	3.59398	28.25	9.74252	41.75	9.74252	35.5	6.02771
321	354 Sp0	Neu5Aca2-6Galb1-4GlcNAcb1-3Galb1-4GlcNAcb1-3Galb1-4GlcNAcb-Sp0	18.75	2.62996	14.5	3.10913	17	1.63299	12.75	1.25831
322	355 Sp0	Gala1-4Galb1-4GlcNAcb1-3Galb1-4Glcb-Sp0	22.75	2.5	19	3.74166	17.25	5.43906	14.25	1.5
323	356 Sp0	GalNAcb1-3Gala1-4Galb1-4GlcNAcb1-3Galb1-4Glcb-Sp0	19	1.41421	18.25	3.30404	16.5	1.29099	14	2
324	357 Sp0	GalNAca1-3(Fuca1-2)Galb1-4GlcNAcb1-3Galb1-4GlcNAcb-Sp0	10.5	2.08167	9.75	1.5	13.5	2.64575	11.5	4.3589
325	358 Sp0	GalNAca1-3(Fuca1-2)Galb1-4GlcNAcb1-3Galb1-4GlcNAcb1-3Galb1-4GlcNAcb-Sp0	26.75	1.5	23.75	4.5	28.75	0.957427	24	2.58199
326	359 Sp14	Neu5Aca2-3Galb1-4(Fuca1-3)GlcNAcb1-6(Neu5Aca2-3Galb1-3)GalNAc-Sp14	36.5	4.65475	33	2.16025	53.75	9.10586	41.25	4.64579
327	360 Sp0	GlcNAca1-4Galb1-4GlcNAcb1-3Galb1-4GlcNAcb1-3Galb1-4GlcNAcb-Sp0	19.5	3	20.25	3.30404	14.75	1.70783	14.25	3.86221
328	361 Sp0	GlcNAca1-4Galb1-4GlcNAcb-Sp0	44	2.16025	41	2.3094	40.5	8.73689	39.75	7.71902
329	362 Sp0	GlcNAca1-4Galb1-3GlcNAcb-Sp0	36.5	9.46925	36.75	8.61684	25.25	7.63217	22.25	5.79511
330	363 Sp0	GlcNAca1-4Galb1-4GlcNAcb1-3Galb1-4Glcb-Sp0	18.25	1.70783	18.25	2.98608	18.25	0.5	15.5	1.73205
331	364 Sp0	GlcNAca1-4Galb1-4GlcNAcb1-3Galb1-4(Fuca1-3)GlcNAcb1-3Galb1-4(Fuca1-3)GlcNAcb-Sp0	72.75	2.21736	75.25	1.70783	69	2.94392	73.5	2.08167
332	365 Sp0	GlcNAca1-4Galb1-4GlcNAcb1-3Galb1-4GlcNAcb-Sp0	24	1.82574	18.5	2.88675	21	3.16228	18.25	3.0957
333	366 Sp14	GlcNAca1-4Galb1-3GalNAc-Sp14	31.75	5.12348	30.75	3.30404	27.25	5.058	33.75	4.42531
334	367 Sp12	Neu5Aca2-6Galb1-4GlcNAcb1-2Mana1-6(Mana1-3)Manb1-4GlcNAcb1-4GlcNAc-Sp12	13.75	3.30404	12.25	3.94757	11.75	1.25831	9.75	0.957427
335	368 Sp12	Mana1-6(Neu5Aca2-6Galb1-4GlcNAcb1-2Mana1-3)Manb1-4GlcNAcb1-4GlcNAc-Sp12	20.25	1.5	17.75	3.20156	18.75	6.94622	20	6.68331
336	369 Sp12	Neu5Aca2-6Galb1-4GlcNAcb1-2Mana1-6Manb1-4GlcNAcb1-4GlcNAc-Sp12	13.5	0.57735	11	1.41421	8	1.82574	8	0.816497
337	370 Sp12	Neu5Aca2-6Galb1-4GlcNAcb1-2Mana1-3Manb1-4GlcNAcb1-4GlcNAc-Sp12	21	0.816497	17.25	1.70783	21.5	2.38048	18	3.55903
338	371 Sp12	Galb1-4GlcNAcb1-2Mana1-3Manb1-4GlcNAcb1-4GlcNAc-Sp12	20.75	3.30404	27.5	1.91485	19	2.44949	28.25	0.5
339	372 Sp12	Galb1-4GlcNAcb1-2Mana1-6Manb1-4GlcNAcb1-4GlcNAc-Sp12	23	2.16025	30.75	6.94622	23.75	6.39661	58.75	13.7204
340	373 Sp12	Mana1-6(Galb1-4GlcNAcb1-2Mana1-3)Manb1-4GlcNAcb1-4GlcNAcb-Sp12	24.5	2.08167	26.5	1.29099	22	0.816497	23.75	2.5
341	374 Sp22	GlcNAcb1-2Mana1-6(GlcNAcb1-2Mana1-3)Manb1-4GlcNAcb1-4(Fuca1-6)GlcNAcb-Sp22	32.5	1.29099	38.25	2.21736	31.75	1.5	56.25	11.3248
342	375 Sp22	Galb1-4GlcNAcb1-2Mana1-6(Galb1-4GlcNAcb1-2Mana1-3)Manb1-4GlcNAcb1-4(Fuca1-6)GlcNAcb-Sp22	28	3.3665	28	2.82843	23.25	2.62996	26.5	3.69685
343	376 Sp22	Galb1-3GlcNAcb1-2Mana1-6(Galb1-3GlcNAcb1-2Mana1-3)Manb1-4GlcNAcb1-4(Fuca1-6)GlcNAcb-Sp22	28.5	5.68624	27.75	6.0208	28.25	8.5	25.75	7.8475
344	379 Sp0	(6S)GlcNAcb1-3Galb1-4GlcNAcb-Sp0	48.75	5.56028	36.25	2.5	34.25	12.816	25.75	7.63217
345	380 Sp0	KDNa2-3Galb1-4(Fuca1-3)GlcNAc-Sp0	32	4.39697	30.75	1.5	36.25	12.816	26.25	7.45542
346	381 Sp0	KDNa2-6Galb1-4GlcNAc-Sp0	23.75	2.5	20.5	1.29099	18.25	2.21736	16.25	1.70783
347	382 Sp0	KDNa2-3Galb1-4Glc-Sp0	26	4.24264	25.25	5.5	36.75	8.61684	29	2.16025
348	383 Sp14	KDNa2-3Galb1-3GalNAca-Sp14	42.25	8.65544	51.25	4.57347	33	8.52447	26.5	3.87298
349	384 Sp20	Fuca1-2Galb1-3GlcNAcb1-2Mana1-6(Fuca1-2Galb1-3GlcNAcb1-2Mana1-3)Manb1-4GlcNAcb1-4GlcNAcb-Sp20	34.25	2.62996	32.5	4.3589	33.5	2.64575	29.5	1.29099
350	385 Sp20	Fuca1-2Galb1-4GlcNAcb1-2Mana1-6(Fuca1-2Galb1-4GlcNAcb1-2Mana1-3)Manb1-4GlcNAcb1-4GlcNAcb-Sp20	37.5	2.88675	42.5	1.91485	32.25	3.0957	32.5	3.31662
351	386 Sp20	Fuca1-2Galb1-4(Fuca1-3)GlcNAcb1-2Mana1-6(Fuca1-2Galb1-4(Fuca1-3)GlcNAcb1-2Mana1-3)Manb1-4GlcNAcb1-4GlcNAb-Sp20	43.75	2.36291	54.25	0.5	40.5	1.73205	44	3.4641
352	387 Sp20	Gala1-3Galb1-4GlcNAcb1-2Mana1-6(Gala1-3Galb1-4GlcNAcb1-2Mana1-3)Manb1-4GlcNAcb1-4GlcNAcb-Sp20	17.75	2.62996	14	2.44949	19.75	1.70783	12.5	1.29099
353	388 Sp12	Galb1-4GlcNAcb1-2Mana1-6(Mana1-3)Manb1-4GlcNAcb1-4GlcNAcb-Sp12	16	4.08248	16	2.94392	15.75	2.62996	9.5	1.73205
354	389 Sp22	Fuca1-4(Galb1-3)GlcNAcb1-2Mana1-6(Fuca1-4(Galb1-3)GlcNAcb1-2Mana1-3)Manb1-4GlcNAcb1-4(Fuca1-6)GlcNAcb-Sp22	37.5	1.29099	36.5	1	35	2.94392	35.75	2.62996
355	390 Sp21	Neu5Aca2-6GlcNAcb1-4GlcNAc-Sp21	18	2.94392	15.75	1.25831	19	2.70801	14.75	1.70783
356	391 Sp21	Neu5Aca2-6GlcNAcb1-4GlcNAcb1-4GlcNAc-Sp21	20.5	3.69685	20.75	7.932	19	2.70801	15	1.41421
357	392 Sp21	Galb1-4(Fuca1-3)GlcNAcb1-6(Fuca1-2Galb1-4GlcNAcb1-3)Galb1-4Glc-Sp21	13.75	1.70783	12	1.41421	17.5	3.69685	11.75	4.19325
358	393 Sp21	Galb1-4GlcNAcb1-2Mana1-6(Galb1-4GlcNAcb1-4(Galb1-4GlcNAcb1-2)Mana1-3)Manb1-4GlcNAcb1-4GlcNAc-Sp21	19.25	2.5	17.5	1	17.25	1.5	14.75	0.957427
359	394 Sp20	GalNAca1-3(Fuca1-2)Galb1-4GlcNAcb1-2Mana1-6(GalNAca1-3(Fuca1-2)Galb1-4GlcNAcb1-2Mana1-3)Manb1-4GlcNAcb1-4GlcNAcb-Sp20	21.25	0.957427	17.5	2.38048	18.5	2.64575	16.5	1.91485
360	395 Sp20	Gala1-3(Fuca1-2)Galb1-4GlcNAcb1-2Mana1-6(Gala1-3(Fuca1-2)Galb1-4GlcNAcb1-2Mana1-3)Manb1-4GlcNAcb1-4GlcNAcb-Sp20	24.75	0.957427	23.5	1.91485	23.5	2.38048	23.25	2.21736
361	396 Sp20	Gala1-3Galb1-4(Fuca1-3)GlcNAcb1-2Mana1-6(Gala1-3Galb1-4(Fuca1-3)GlcNAcb1-2Mana1-3)Manb1-4GlcNAcb1-4GlcNAcb-Sp20	46.5	3.51188	52.25	2.21736	42.5	0.57735	62	2.44949
362	397 Sp20	GalNAca1-3(Fuca1-2)Galb1-3GlcNAcb1-2Mana1-6(GalNAca1-3(Fuca1-2)Galb1-3GlcNAcb1-2Mana1-3)Manb1-4GlcNAcb1-4GlcNAcb-Sp20	35	6.0553	39.75	7.932	27	7.43864	34	8.52447
363	398 Sp20	Galα1-3(Fucα1-2)Galβ1-3GlcNAcβ1-2Manα1-6(Galcα1-3(Fucα1-2)Galβ1-3GlcNAcβ1-2Manα1-3)Manβ1-4GlcNAcβ1-4GlcNAcβ-Sp20	30.25	3.77492	35.75	5.12348	34.75	3.30404	40	1.1547
364	399 Sp19	Fuca1-4(Fuca1-2Galb1-3)GlcNAcb1-2Mana1-3(Fuca1-4(Fuca1-2Galb1-3)GlcNAcb1-2Mana1-3)Manb1-4GlcNAcb1-4GlcNAcb-Sp19	34.75	3.77492	37.75	5.43906	36.25	5.37742	65.25	1.5
365	400 Sp14	Neu5Aca2-3Galb1-4GlcNAcb1-3GalNAc-Sp14	25.25	2.06155	30.75	8.34166	18.75	2.75379	27.5	4.12311
366	401 Sp14	Neu5Aca2-6Galb1-4GlcNAcb1-3GalNAc-Sp14	25.25	2.87228	28.75	7.08872	18.5	6.13732	28.25	7.63217
367	402 Sp14	Neu5Aca2-3Galb1-4(Fuca1-3)GlcNAcb1-3GalNAca-Sp14	60.25	3.86221	64	6.78233	59.75	1.5	70.75	5.37742
368	403 Sp12	GalNAcb1-4GlcNAcb1-2Mana1-6(GalNAcb1-4GlcNAcb1-2Mana1-3)Manb1-4GlcNAcb1-4GlcNAc-Sp12	41	3.3665	45.75	2.06155	37.25	4.19325	37.75	4.03113
369	404 Sp0	Galb1-3GalNAca1-3(Fuca1-2)Galb1-4Glc-Sp0	20.25	4.03113	64.25	13.1498	121	11.4891	97.25	4.57347
370	405 Sp0	Galb1-3GalNAca1-3(Fuca1-2)Galb1-4GlcNAc-Sp0	14.75	2.62996	12.75	7.5	12	4.76095	10.75	2.87228
371	406 Sp21	Galb1-3GlcNAcb1-3Galb1-4GlcNAcb1-6(Galb1-3GlcNAcb1-3)Galb1-4Glcb-Sp0	16.25	2.21736	12	1.82574	13.5	1.91485	11.25	2.06155
372	407 Sp21	Galb1-4(Fuca1-3)GlcNAcb1-6(Galb1-3GlcNAcb1-3)Galb1-4Glc-Sp21	18.5	3.78594	13	3.16228	13.25	3.86221	5.75	4.34933
373	408 Sp21	Galb1-4GlcNAcb1-6(Fuca1-4(Fuca1-2Galb1-3)GlcNAcb1-3)Galb1-4Glc-Sp21	42.5	3.10913	46.75	6.99405	35	7.61577	48.75	9.56992
374	409 Sp21	Galb1-4(Fuca1-3)GlcNAcb1-6(Fuca1-4(Fuca1-2Galb1-3)GlcNAcb1-3)Galb1-4Glc-Sp21	27.75	2.5	28	3.82971	21.75	3.86221	23.75	2.87228
375	410 Sp21	Galb1-3GlcNAcb1-3Galb1-4(Fuca1-3)GlcNAcb1-6(Galb1-3GlcNAcb1-3)Galb1-4Glc-Sp21	20.25	2.21736	20.5	1.91485	15.25	5.058	27	4.16333
376	411 Sp21	Galb1-4GlcNAcb1-6(Galb1-4GlcNAcb1-2)Mana1-6(Galb1-4GlcNAcb1-4(Galb1-4GlcNAcb1-2)Mana1-3)Manb1-4GlcNAcb1-4GlcNAcb-Sp21	16	5.59762	21.5	5.91608	20.75	2.36291	18.25	0.5
377	412 Sp21	GlcNAcb1-2Mana1-6(GlcNAcb1-4(GlcNAcb1-2)Mana1-3)Manb1-4GlcNAcb1-4GlcNAc-Sp21	21.25	5.31507	25.25	1.5	13.5	4.93288	14.5	3.10913
378	413 Sp0	Fuca1-2Galb1-3GalNAca1-3(Fuca1-2)Galb1-4Glcb-Sp0	30.5	4.65475	30.5	1.91485	25.5	6.35085	20.75	7.13559
379	414 Sp0	Fuca1-2Galb1-3GalNAca1-3(Fuca1-2)Galb1-4GlcNAcb-Sp0	23.25	3.30404	28.75	6.94622	17.25	7.8475	15.25	4.272
380	415 Sp14	Galb1-3GlcNAcb1-3GalNAca-Sp14	13.5	3	15.25	1.89297	17	5.16398	16.75	6.80074
381	416 Sp14	GalNAcb1-4(Neu5Aca2-3)Galb1-4GlcNAcb1-3GalNAca-Sp14	20.5	3.41565	15.5	4.79583	31	4.24264	24.25	1.70783
382	417 Sp0	GalNAca1-3(Fuca1-2)Galb1-3GalNAca1-3(Fuca1-2)Galb1-4GlcNAcb-Sp0	15.25	2.5	15.75	0.957427	11.25	3.30404	16.25	1.89297
383	418 Sp19	Gala1-3Galb1-3GlcNAcb1-2Mana1-6(Gala1-3Galb1-3GlcNAcb1-2Mana1-3)Manb1-4GlcNAcb1-4GlcNAc-Sp19	33.25	5.85235	29.75	4.34933	34	3.55903	28	2.16025
384	419 Sp19	Gala1-3Galb1-3(Fuca1-4)GlcNAcb1-2Mana1-6(Gala1-3Galb1-3(Fuca1-4)GlcNAcb1-2Mana1-3)Manb1-4GlcNAcb1-4GlcNAc-Sp19	43.5	0.57735	41	2.16025	37.25	2.21736	41.25	2.21736
385	421 Sp12	GlcNAcb1-2Mana1-6(Galb1-4GlcNAcb1-2Mana1-3)Manb1-4GlcNAcb1-4GlcNAc-Sp12	26.5	2.51661	50	10.8012	15.25	3.86221	49	32.3213
386	422 Sp12	Galb1-4GlcNAcb1-2Mana1-6(GlcNAcb1-2Mana1-3)Manb1-4GlcNAcb1-4GlcNAc-Sp12	21.25	2.21736	25.5	2.88675	17	2.44949	31	5.47723
387	423 Sp14	Neu5Aca2-3Galb1-3GlcNAcb1-3GalNAca-Sp14	25	2.58199	34.25	3.5	40.5	21.6718	129.5	41.1218
388	424 Sp14	Fuca1-2Galb1-4GlcNAcb1-3GalNAca-Sp14	35.75	2.5	37.75	4.64579	29.75	3.68556	47.25	4.5
389	425 Sp14	Galb1-4(Fuca1-3)GlcNAcb1-3GalNAca-Sp14	26.5	4.79583	25.5	5	20.75	6.0208	32.25	4.272
390	426 Sp0	GalNAca1-3GalNAcb1-3Gala1-4Galb1-4GlcNAcb-Sp0	12	3.16228	13.75	2.75379	12.75	2.21736	16	1.82574
391	427 Sp19	Gala1-4Galb1-3GlcNAcb1-2Mana1-6(Gala1-4Galb1-3GlcNAcb1-2Mana1-3)Manb1-4GlcNAcb1-4GlcNAcb-Sp19	28.25	3.86221	27.25	1.25831	23	7.39369	20	5.59762
392	428 Sp24	Gala1-4Galb1-4GlcNAcb1-2Mana1-6(Gala1-4Galb1-4GlcNAcb1-2Mana1-3)Manb1-4GlcNAcb1-4GlcNAcb-Sp24	42.25	7.63217	46.25	18.0069	30.5	3.69685	30.25	4.03113
393	429 Sp14	Gala1-3Galb1-4GlcNAcb1-3GalNAca-Sp14	11.5	4.65475	11.5	3.69685	17.5	14.1067	13.75	6.65207
394	430 Sp0	Galb1-3GlcNAcb1-6Galb1-4GlcNAcb-Sp0	23.5	4.79583	18.25	0.5	19	4.32049	15.75	1.25831
395	431 Sp0	Galb1-3GlcNAca1-6Galb1-4GlcNAcb-Sp0	22.25	4.99166	18.75	2.36291	20.75	6.60177	19.75	4.11299
396	432 Sp8	GalNAcb1-3Gala1-6Galb1-4Glcb-Sp8	21.5	5.19615	23.25	3.30404	22.25	1.25831	29.25	2.06155
397	434 Sp21	Gala1-3(Fuca1-2)Galb1-4(Fuca1-3)Glcb-Sp21	29.75	6.0208	28.75	5.56028	23.5	6.35085	18.75	2.5
398	435 Sp21	Galb1-4GlcNAcb1-6(Neu5Aca2-6Galb1-3GlcNAcb1-3)Galb1-4Glc-Sp21	32	4.24264	30.25	2.62996	24.5	4.20317	28.75	2.75379
399	436 Sp0	Galb1-3GalNAcb1-4(Neu5Aca2-8Neu5Aca2-3)Galb1-4Glcb-Sp0	76	1.82574	106.5	6.55744	71	6.32456	53.75	6.75154
400	437 Sp0	Neu5Aca2-3Galb1-3GalNAcb1-4(Neu5Aca2-8Neu5Aca2-3)Galb1-4Glcb-Sp0	43.5	4.65475	51.5	3	39	3.16228	65.25	6.39661
401	438 Sp14	Gala1-3(Fuca1-2)Galb1-4GlcNAcb1-3GalNAca-Sp14	8.75	3.40343	14.75	5.31507	18.25	3.59398	19.25	3.59398
402	439 Sp14	GalNAca1-3(Fuca1-2)Galb1-4GlcNAcb1-3GalNAca-Sp14	25.5	9.39858	31.75	8.53913	17.25	12.5532	16.5	10.083
403	440 Sp0	GalNAca1-3GalNAcb1-3Gala1-4Galb1-4Glcb-Sp0	12.75	3.86221	15.75	4.03113	12.25	6.75154	12.75	6.89807
404	441 Sp14	Fuca1-2Galb1-4(Fuca1-3)GlcNAcb1-3GalNAca-Sp14	58.25	11.0265	58.25	13.2004	71.75	8.18026	64.5	7.04746
405	442 Sp14	Gala1-3(Fuca1-2)Galb1-4(Fuca1-3)GlcNAcb1-3GalNAc-Sp14	27.25	4.71699	24.75	3.77492	20.75	0.957427	19.75	0.957427
406	443 Sp14	GalNAca1-3(Fuca1-2)Galb1-4(Fuca1-3)GlcNAcb1-3GalNAc-Sp14	41.25	4.57347	40.25	2.87228	43.5	6.95222	40.5	4.3589
407	444 Sp22	Galb1-4(Fuca1-3)GlcNAcb1-2Mana1-6(Galb1-4(Fuca1-3)GlcNAcb1-2Mana1-3)Manb1-4GlcNAcb1-4(Fuca1-6)GlcNAcb-Sp22	39.25	2.21736	43.5	10.247	33.75	2.06155	33	4.32049
408	445 Sp22	Fuca1-2Galb1-4GlcNAcb1-2Mana1-6(Fuca1-2Galb1-4GlcNAcb1-2Mana1-3)Manb1-4GlcNAcb1-4(Fuca1-6)GlcNAcb-Sp22	38.25	4.34933	49.25	3.77492	37.75	2.75379	64.75	2.87228
409	446 Sp19	GlcNAcb1-2(GlcNAcb1-6)Mana1-6(GlcNAcb1-2Mana1-3)Manb1-4GlcNAcb1-4GlcNAcb-Sp19	30.25	6.44851	42.5	10.116	34	7.52773	73.75	27.8134
410	447 Sp14	Fuca1-2Galb1-3GlcNAcb1-3GalNAc-Sp14	28.5	3.87298	33.25	3.40343	24.25	0.5	56.5	11.2101
411	448 Sp14	Gala1-3(Fuca1-2)Galb1-3GlcNAcb1-3GalNAc-Sp14	32.5	4.93288	50.5	3.87298	138.25	107.034	253.25	77.9802
412	449 Sp14	GalNAca1-3(Fuca1-2)Galb1-3GlcNAcb1-3GalNAc-Sp14	36	3.65148	52.5	5.32291	39	3.16228	70.25	4.272
413	450 Sp14	Gala1-3Galb1-3GlcNAcb1-3GalNAc-Sp14	22.5	1.29099	31	6.0553	15.75	3.30404	44	14.5144
414	451 Sp22	Fuca1-2Galb1-3GlcNAcb1-2Mana1-6(Fuca1-2Galb1-3GlcNAcb1-2Mana1-3)Manb1-4GlcNAcb1-4(Fuca1-6)GlcNAcb-Sp22	33.75	4.71699	34.75	2.75379	32	2.16025	39	4.69042
415	452 Sp22	Gala1-3(Fuca1-2)Galb1-4GlcNAcb1-2Mana1-6(Gala1-3(Fuca1-2)Galb1-4GlcNAcb1-2Mana1-3)Manb1-4GlcNAcb1-4(Fuca1-6)GlcNAcb-Sp22	31	3.74166	32.75	2.21736	25.5	2.88675	29	2.44949
416	453 Sp19	Galb1-3GlcNAcb1-6(Galb1-3GlcNAcb1-2)Mana1-6(Galb1-3GlcNAcb1-2Mana1-3)Manb1-4GlcNAcb1-4GlcNAcb-Sp19	28.25	6.84957	26.75	6.29153	22.25	2.62996	22.5	2.64575
417	454 Sp21	Galb1-4GlcNAcb1-6(Fuca1-2Galb1-3GlcNAcb1-3)Galb1-4Glc-Sp21	11.5	5.19615	7.25	3.20156	12.75	2.98608	14.5	2.88675
418	455 Sp21	Fuca1-3GlcNAcb1-6(Galb1-4GlcNAcb1-3)Galb1-4Glc-Sp21	15.75	4.19325	14.75	1.25831	13.75	2.62996	11.5	1.91485
419	456 Sp21	GlcNAcb1-2Mana1-6(GlcNAcb1-4)(GlcNAcb1-2Mana1-3)Manb1-4GlcNAcb1-4GlcNAc-Sp21	11.5	2.88675	10.75	3.59398	10.25	1.70783	8.5	0.57735
420	457 Sp21	GlcNAcb1-2Mana1-6(GlcNAcb1-4)(GlcNAcb1-4(GlcNAcb1-2)Mana1-3)Manb1-4GlcNAcb1-4GlcNAc-Sp21	25	2.3094	22.25	1.25831	18.5	1	20.75	0.957427
421	458 Sp21	GlcNAcb1-6(GlcNAcb1-2)Mana1-6(GlcNAcb1-4)(GlcNAcb1-2Mana1-3)Manb1-4GlcNAcb1-4GlcNAc-Sp21	18.25	5.31507	14.25	4.11299	19	1.63299	18.75	2.62996
422	459 Sp21	GlcNAcb1-6(GlcNAcb1-2)Mana1-6(GlcNAcb1-4)(GlcNAcb1-4(GlcNAcb1-2)Mana1-3)Manb1-4GlcNAcb1-4GlcNAc-Sp21	21	2.94392	28	4.24264	18.75	2.21736	22.5	3.69685
423	460 Sp21	Galb1-4GlcNAcb1-2Mana1-6(GlcNAcb1-4)(Galb1-4GlcNAcb1-2Mana1-3)Manb1-4GlcNAcb1-4GlcNAc-Sp21	13.5	4.04145	13.75	1.25831	14.75	2.62996	12.5	3.10913
424	461 Sp21	Galb1-4GlcNAcb1-2Mana1-6(GlcNAcb1-4)(Galb1-4GlcNAcb1-4(Galb1-4GlcNAcb1-2)Mana1-3)Manb1-4GlcNAcb1-4GlcNAc-Sp21	18.75	2.5	22	4.08248	12	0.816497	14.25	1.70783
425	462 Sp21	Galb1-4GlcNAcb1-6(Galb1-4GlcNAcb1-2)Mana1-6(GlcNAcb1-4)(Galb1-4GlcNAcb1-2Mana1-3)Manb1-4GlcNAcb1-4GlcNAc-Sp21	16.25	2.5	17	3.16228	11.25	2.21736	10.25	2.21736
426	463 Sp21	Galb1-4GlcNAcb1-6(Galb1-4GlcNAcb1-2)Mana1-6(GlcNAcb1-4)(Galb1-4GlcNAcb1-4(Galb1-4GlcNAcb1-2)Mana1-3)Manb1-4GlcNAcb1-4GlcNAc-Sp21	13.75	0.5	16.75	3.30404	12.5	9.71253	3.25	5.37742
427	465 Sp10	Galb1-4Galb-Sp10	47	6.27163	69.5	25.0932	37	13.9762	43.5	15.6738
428	466 Sp10	Galb1-6Galb-Sp10	61.25	2.06155	74.5	14.1539	61	4.89898	70	7.48331
429	467 Sp8	Neu5Aca2-3Galb1-4GlcNAcb1-3Galb-Sp8	19	1.41421	14.75	3.40343	18	2.16025	16	2.58199
430	468 Sp8	GalNAcb1-6GalNAcb-Sp8	33.25	2.21736	28.25	2.98608	25	4.54606	26.5	7.85281
431	469 Sp0	(6S)Galb1-3GlcNAcb-Sp0	41.5	5.56776	36.5	3.51188	32.5	5.8023	29.75	6.18466
432	470 Sp0	(6S)Galb1-3(6S)GlcNAc-Sp0	98.75	6.84957	100	9.93311	82.25	12.9968	167.75	28.5351
433	471 Sp12	Fuca1-2Galb1-4 GlcNAcb1-2Mana1-6(Fuca1-2Galb1-4GlcNAcb1-2(Fuca1-2Galb1-4GlcNAcb1-4)Mana1-3)Manb1-4GlcNAcb1-4GlcNAcb-Sp12	40.75	3.77492	46	2.94392	36	0.816497	68	7.34847
434	472 Sp12	Fuca1-2Galb1-4(Fuca1-3)GlcNAcb1-2Mana1-6(Fuca1-2Galb1-4(Fuca1-3)GlcNAcb1-4(Fuca1-2Galb1-4(Fuca1-3)GlcNAcb1-2)Mana1-3)Manb1-4GlcNAcb1-4GlcNAcb-Sp12	59.75	1.25831	64.75	3.20156	47.25	4.57347	76.25	3.40343
435	475 Sp14	Galb1-4(Fuca1-3)GlcNAcb1-6GalNAc-Sp14	45	3.82971	48	2.16025	53.75	10.4363	111.25	24.7167
436	476 Sp0	Galb1-4GlcNAcb1-2Mana-Sp0	59.25	7.32006	82.75	2.62996	74.75	2.06155	117.5	7.14143
437	478 Sp14	Fuca1-2Galb1-4GlcNAcb1-6(Fuca1-2Galb1-4GlcNAcb1-3)GalNAc-Sp14	33.25	3.86221	59.5	3.87298	48.5	3.41565	97.75	14.5
438	479 Sp14	Gala1-3(Fuca1-2)Galb1-4GlcNAcb1-6(Gala1-3(Fuca1-2)Galb1-4GlcNAcb1-3)GalNAc-Sp14	16.5	3.69685	24.5	3.69685	26.75	3.77492	46	5.35413
439	480 Sp14	GalNAca1-3(Fuca1-2)Galb1-4GlcNAcb1-6(GalNAca1-3(Fuca1-2)Galb1-4GlcNAcb1-3)GalNAc-Sp14	17.25	1.70783	19.5	2.64575	24	1.1547	25	2.16025
440	481 Sp0	Neu5Aca2-8Neu5Aca2-3Galb1-3GalNAcb1-4(Neu5Aca2-8Neu5Aca2-3)Galb1-4Glcb-Sp0	36.75	4.57347	36.75	6.55108	38.5	5.50757	38.5	3
441	482 Sp0	GalNAcb1-4Galb1-4Glcb-Sp0	74	24.6577	93.25	33.3004	80.5	13.1276	89.5	15.2425
442	483 Sp22	GalNAca1-3(Fuca1-2)Galb1-4GlcNAcb1-2Mana1-6(GalNAca1-3(Fuca1-2)Galb1-4GlcNAcb1-2Mana1-3)Manb1-4GlcNAcb1-4(Fuca1-6)GlcNAcb-Sp22	30	2.16025	26	1.1547	24.75	3.5	23.25	2.36291
443	484 Sp22	Gala1-3(Fuca1-2)Galb1-3GlcNAcb1-2Mana1-6(Gala1-3(Fuca1-2)Galb1-3GlcNAcb1-2Mana1-3)Manb1-4GlcNAcb1-4(Fuca1-6)GlcNAcb-Sp22	24.25	3.30404	21.75	3.0957	24.75	1.70783	23.25	4.5
444	485 Sp21	Neu5Aca2-6Galb1-4GlcNAcb1-6(Fuca1-2Galb1-3GlcNAcb1-3)Galb1-4Glc-Sp21	37.5	5	36.75	6.65207	36.5	4.04145	46.5	2.51661
445	486 Sp22	GalNAca1-3(Fuca1-2)Galb1-3GlcNAcb1-2Mana1-6(GalNAca1-3(Fuca1-2)Galb1-3GlcNAcb1-2Mana1-3)Manb1-4GlcNAcb1-4(Fuca1-6)GlcNAcb-Sp22	27.75	2.06155	27.75	2.21736	27.75	2.21736	27.25	3.0957
446	487 Sp19	Galb1-4GlcNAcb1-6(Galb1-4GlcNAcb1-2)Mana1-6(Galb1-4GlcNAcb1-2Mana1-3)Manb1-4GlcNAcb1-4GlcNAcb-Sp19	31.75	3.86221	32	4.83046	26.75	2.36291	34.25	3.86221
447	489Sp21	Neu5Aca2-3Galb1-4GlcNAcb1-2Mana1-6(GlcNAcb1-4)(Neu5Aca2-3Galb1-4GlcNAcb1-2Mana1-3)Manb1-4GlcNAcb1-4GlcNAcb-Sp21	17.75	6.75154	19.25	8.4212	22	0.816497	19.75	2.21736
448	490Sp21	Neu5Aca2-3Galb1-4GlcNAcb1-4Mana1-6(GlcNAcb1-4)(Neu5Aca2-3Galb1-4GlcNAcb1-4(Neu5Aca2-3Galb1-4GlcNAcb1-2)Mana1-3)Manb1-4GlcNAcb1-4GlcNAcb-Sp21	20.5	3.10913	32.25	12.1209	22.5	4.65475	30	4.32049
449	491Sp21	Neu5Aca2-3Galb1-4GlcNAcb1-6(Neu5Aca2-3Galb1-4GlcNAcb1-2)Mana1-6(GlcNAcb1-4)(Neu5Aca2-3Galb1-4GlcNAcb1-2Mana1-3)Manb1-4GlcNAcb1-4GlcNAcb-Sp21	17.75	2.62996	18.5	3.69685	14.25	2.06155	13	7.25718
450	492Sp21	Neu5Aca2-3Galb1-4GlcNAcb1-6(Neu5Aca2-3Galb1-4GlcNAcb1-2)Mana1-6(GlcNAcb1-4)(Neu5Aca2-3Galb1-4GlcNAcb1-4(Neu5Aca2-3Galb1-4GlcNAcb1-2)Mana1-3)Manb1-4GlcNAcb1-4GlcNAcb-Sp21	22.75	0.957427	32.5	4.04145	20.5	4.04145	16.75	9.74252
451	493Sp21	Neu5Aca2-6Galb1-4GlcNAcb1-2Mana1-6(GlcNAcb1-4)(Neu5Aca2-6Galb1-4GlcNAcb1-2Mana1-3)Manb1-4GlcNAcb1-4GlcNAcb-Sp21	19.25	2.21736	21.25	4.11299	22.5	1	29	5.41603
452	494Sp21	Neu5Aca2-6Galb1-4GlcNAcb1-4Mana1-6(GlcNAcb1-4)(Neu5Aca2-6Galb1-4GlcNAcb1-4(Neu5Aca2-6Galb1-4GlcNAcb1-2)Mana1-3)Manb1-4GlcNAcb1-4GlcNAcb-Sp21	20	2.58199	46.25	16.6608	25	1.63299	20.25	1.70783
453	495Sp21	Neu5Aca2-6Galb1-4GlcNAcb1-6(Neu5Aca2-6Galb1-4GlcNAcb1-2)Mana1-6(GlcNAcb1-4)(Neu5Aca2-6Galb1-4GlcNAcb1-2Mana1-3)Manb1-4GlcNAcb1-4GlcNAcb-Sp21	15.5	2.64575	12.75	5.12348	17.5	1	17.5	0.57735
454	496Sp21	Neu5Aca2-6Galb1-4GlcNAcb1-6(Neu5Aca2-6Galb1-4GlcNAcb1-2)Mana1-6(GlcNAcb1-4)(Neu5Aca2-6Galb1-4GlcNAcb1-4(Neu5Aca2-6Galb1-4GlcNAcb1-2)Mana1-3)Manb1-4GlcNAcb1-4GlcNAcb-Sp21	25	6.68331	24.75	6.55108	26.5	3.31662	25.5	2.38048
455	499 Sp8	Gala1-3(Fuca1-2)Galb1-3GalNAca-Sp8	21.5	2.64575	17	1.82574	18	0.816497	17.5	1.29099
456	500 Sp8	Gala1-3(Fuca1-2)Galb1-3GalNAcb-Sp8	33.5	9.46925	32.25	6.60177	33.75	5.25198	27.75	6.99405
457	501 Sp10	Glca1-6Glca1-6Glca1-6Glcb-Sp10	44.75	5.5	43	4.96655	51	17.5119	41.75	9.17878
458	502 Sp10	Glca1-4Glca1-4Glca1-4Glcb-Sp10	34.75	6.23832	35.75	9.94569	36	5.59762	31.75	6.07591
459	503 Sp14	Neu5Aca2-3Galb1-4GlcNAcb1-6(Neu5Aca2-3Galb1-4GlcNAcb1-3)GalNAca-Sp14	20.25	8.09835	16.25	6.65207	40.25	14.7958	26	7.48331
460	504 Sp24	Fuca1-2Galb1-4(Fuca1-3)GlcNAcb1-2Mana1-6(Fuca1-2Galb1-4(Fuca1-3)GlcNAcb1-2Mana1-3)Manb1-4GlcNAcb1-4(Fuca1-6)GlcNAcb-Sp24	76	3.74166	80.5	3.31662	71	1.41421	120.75	4.19325
461	505 Sp19	Fuca1-2Galb1-3(Fuca1-4)GlcNAcb1-2Mana1-6(Fuca1-2Galb1-3(Fuca1-4)GlcNAcb1-2Mana1-3)Manb1-4GlcNAcb1-4(Fuca1-6)GlcNAcb1-4(Fuca1-6)GlcNAcb-Sp19	58.5	4.79583	70.25	5.37742	57	9.20145	96.75	5.12348
462	507 Sp24	GlcNAcb1-6(GlcNAcb1-2)Mana1-6(GlcNAcb1-2Mana1-3)Manb1-4GlcNAcb1-4(Fuca1-6)GlcNAcb-Sp24	44.25	2.87228	45.5	4.65475	40	3.3665	61.75	7.32006
463	508 Sp21	Galb1-3GlcNAcb1-2Mana1-6(GlcNAcb1-4)(Galb1-3GlcNAcb1-2Mana1-3)Manb1-4GlcNAcb1-4GlcNAcb-Sp21	39	5.59762	42.75	0.5	31.75	2.62996	52.5	5.32291
464	509 Sp21	Neu5Aca2-6Galb1-4GlcNAcb1-6(Galb1-3GlcNAcb1-3)Galb1-4Glcb-Sp21	22	2.58199	26.75	2.06155	19.75	4.57347	25.25	2.98608
465	510 Sp0	Neu5Aca2-3Galb1-4GlcNAcb1-2Mana-Sp0	70.5	7.85281	86.25	10.0457	77.25	9.81071	138.25	20.6135
466	511 Sp14	Neu5Aca2-3Galb1-4GlcNAcb1-6GalNAca-Sp14	22.75	1.5	23.5	1.29099	24	2.58199	26	2.44949
467	512 Sp14	Neu5Aca2-6Galb1-4GlcNAcb1-6GalNAca-Sp14	42	7.39369	45.25	7.54431	63.75	22.809	67.5	22.3383
468	513 Sp14	Neu5Aca2-6Galb1-4 GlcNAcb1-6(Neu5Aca2-6Galb1-4GlcNAcb1-3)GalNAca-Sp14	18.75	6.39661	15.75	3.40343	19	3.55903	16.75	3.86221
469	514 Sp24	Neu5Aca2-6Galb1-4GlcNAcb1-2Mana1-6(Neu5Aca2-6Galb1-4GlcNAcb1-2Mana1-3)Manb1-4GlcNAcb1-4(Fuca1-6)GlcNAcb-Sp24	40.25	2.21736	32.25	2.75379	41.75	4.272	36.5	3.69685
470	515 Sp24	Neu5Aca2-3Galb1-4GlcNAcb1-2Mana1-6(Neu5Aca2-3Galb1-4GlcNAcb1-2Mana1-3)Manb1-4GlcNAcb1-4(Fuca1-6)GlcNAcb-Sp24	41	1.63299	45.75	2.98608	35.5	4.50925	37	2.94392
471	516 Sp19	Mana1-6(Mana1-3)Manb1-4GlcNAcb1-4(Fuca1-6)GlcNAcb-Sp19	30.25	1.89297	32.25	5.85235	38.5	1.73205	36.75	1.89297
472	517 Sp24	Galb1-4GlcNAcb1-6(Galb1-4GlcNAcb1-2)Mana1-6(Galb1-4GlcNAcb1-2Mana1-3)Manb1-4GlcNAcb1-4(Fuca1-6)GlcNAcb-Sp24	54.5	3.87298	51.75	2.62996	47	7.11805	55.5	6.13732
473	518 Sp21	Neu5Aca2-3Galb1-3GlcNAcb1-2Mana1-6(GlcNAcb1-4)(Neu5Aca2-3Galb1-3GlcNAcb1-2Mana1-3)Manb1-4GlcNAcb1-4GlcNAc-Sp21	36.25	6.65207	71.25	12.2031	48.75	10.9354	83.5	3.69685
474	519 Sp21	Neu5Aca2-6Galb1-4GlcNAcb1-6(Fuca1-2Galb1-4(Fuca1-3)GlcNAcb1-3)Galb1-4Glc-Sp21	26.5	2.51661	31.25	2.98608	17.5	6.95222	18.75	5.7373
475	520 Sp14	Galb1-3GlcNAcb1-6GalNAca-Sp14	14.5	1.73205	17	3.16228	12.25	4.34933	12.5	2.64575
476	521 Sp14	Gala1-3Galb1-3GlcNAcb1-6GalNAca-Sp14	14.5	3	15.25	1.5	12.75	6.34429	9.5	5.19615
477	522 Sp14	Galb1-3(Fuca1-4)GlcNAcb1-6GalNAca-Sp14	38.75	2.62996	40.25	1.89297	32.75	1.25831	35.25	1.25831
478	523 Sp14	Neu5Aca2-3Galb1-3GlcNAcb1-6GalNAca-Sp14	20.75	0.957427	20.25	0.957427	21.5	3.87298	18	0.816497
479	524 Sp0	(3S)Galb1-3(Fuca1-4)GlcNAcb-Sp0	37.75	5.12348	34	4.08248	28.75	6.0208	25.25	5.37742
480	525 Sp21	Galb1-4(Fuca1-3)GlcNAcb1-6(Neu5Aca2-6(Neu5Aca2-3Galb1-3)GlcNAcb1-3)Galb1-4Glc-Sp21	21.75	7.18215	16.75	4.11299	23	3.3665	21.5	7.14143
481	526 Sp14	Fuca1-2Galb1-4GlcNAcb1-6GalNAca-Sp14	29	2.94392	30	7.87401	26.5	5.19615	21.5	3.10913
482	527 Sp14	Gala1-3Galb1-4GlcNAcb1-6GalNAca-Sp14	24	1.82574	33.75	5.31507	28.25	7.18215	79.75	27.9449
483	528 Sp0	Galb1-4(Fuca1-3)GlcNAcb1-2Mana-Sp0	65	22.0151	72.5	26.8887	67.75	10.751	95.75	5.12348
484	529 Sp0	Fuca1-2(6S)Galb1-3GlcNAcb-Sp0	45.25	6.29153	51.5	5	30.25	3.30404	65.5	9.88264
485	530 Sp14	Gala1-3(Fuca1-2)Galb1-4GlcNAcb1-6GalNAca-Sp14	47.25	29.7139	132.75	89.3099	36	20.7686	302.25	48.8561
486	531 Sp0	Fuca1-2Galb1-4GlcNAcb1-2Mana-Sp0	41.5	11.9024	66.75	26.3233	43.25	9.56992	105	12.0277
487	532 Sp0	Fuca1-2Galb1-3(6S)GlcNAcb-Sp0	58.25	11.0868	75	14.0238	47	7.78888	79.75	13.4753
488	533 Sp0	Fuca1-2(6S)Galb1-3(6S)GlcNAcb-Sp0	55.25	1.5	60	3.16228	50.5	3.41565	84	9.96661
489	534 Sp8	Neu5Aca2-6GalNAcb1-4(6S)GlcNAcb-Sp8	29.75	2.98608	30.25	4.11299	27.75	1.25831	26	2.58199
490	535 Sp8	GalNAcb1-4(Fuca1-3)(6S)GlcNAcb-Sp8	34.75	6.13052	28.5	5.06623	35.25	11.2953	29.25	7.97392
491	536 Sp8	(3S)GalNAcb1-4(Fuca1-3)GlcNAcb-Sp8	36	6.32456	28.5	4.3589	19.25	5.56028	19	3.16228
492	537 Sp14	Fuca1-2Galb1-3GlcNAcb1-6(Fuca1-2Galb1-3GlcNAcb1-3)GalNAca-Sp14	34.5	2.51661	30.25	2.62996	27	6.21825	27.25	4.78714
493	538 Sp14	GalNAca1-3(Fuca1-2)Galb1-3GlcNAcb1-6GalNAca-Sp14	23.75	2.62996	33	6.97615	20.75	2.62996	20	1.41421
494	539 Sp21	GlcNAcb1-6(GlcNAcb1-2)Mana1-6(GlcNAcb1-4)(GlcNAcb1-4(GlcNAcb1-2)Mana1-3)Manb1-4GlcNAcb1-4(Fuca1-6)GlcNAc-Sp21	17.5	2.08167	16.5	2.08167	16	1.1547	12.5	0.57735
495	540 Sp21	Galb1-4GlcNAcb1-6(Galb1-4GlcNAcb1-2)Mana1-6(GlcNAcb1-4)Galb1-4GlcNAcb1-4(Gal b1-4GlcNAcb1-2)Mana1-3)Manb1-4GlcNAcb1-4(Fuca1-6)GlcNAc-Sp21	19.5	3.31662	17.25	2.62996	16.5	2.08167	18.75	4.19325
496	541 Sp8	Galb1-3GlcNAca1-3Galb1-4GlcNAcb-Sp8	19.25	10.1448	20.25	11.5289	25.25	2.98608	23	2.58199
497	542 Sp8	Galb1-3(6S)GlcNAcb-Sp8	54	16.1452	66.5	12.1792	46.25	9.77667	47.25	7.45542
498	543 Sp8	(6S)(4S)GalNAcb1-4GlcNAc-Sp8	49.25	5.25198	54.5	6.45497	46	5.59762	56.5	5
499	544 Sp8	(6S)GalNAcb1-4GlcNAc-Sp8	40.25	2.62996	38.25	4.92443	15	10.8628	15.75	9.94569
500	545 Sp8	(3S)GalNAcb1-4(3S)GlcNAc-Sp8	43.25	8.34166	36.25	1.89297	28	1.41421	29	4.69042
501	546 Sp8	GalNAcb1-4(6S)GlcNAc-Sp8	52.5	4.04145	45.25	2.87228	39.5	7.04746	32.25	5.56028
502	547 Sp8	(3S)GalNAcb1-4GlcNAc-Sp8	41.5	3.69685	35.25	7.41058	32.25	5.18813	24.25	4.42531
503	548 Sp10	(4S)GalNAcb-Sp10	33.25	4.03113	30.25	6.99405	23.25	2.06155	23.25	4.71699
504	549 Sp0	Galb1-4(6P)GlcNAcb-Sp0	48.5	6.60808	43.5	3.69685	64.5	29.3314	42	13.2916
505	550 Sp0	(6P)Galb1-4GlcNAcb-SP0	59.75	6.70199	133.25	27.2198	43.75	18.482	109.25	21.1719
506	551 Sp14	GalNAca1-3(Fuca1-2)Galb1-4GlcNAcb1-6GalNAc-Sp14	26.75	2.21736	37	7.61577	31	13.9762	77.75	53.8354
507	552 Sp0	Neu5Aca2-6Galb1-4GlcNAcb1-2Man-Sp0	27.75	3.30404	56	11.3431	42.75	14.151	104	25.9101
508	553 Sp0	Gala1-3Galb1-4GlcNAcb1-2Mana-Sp0	20	2.94392	23.75	5.56028	28	7.61577	73	14.1657
509	554 Sp0	Gala1-3(Fuca1-2)Galb1-4GlcNAcb1-2Mana-Sp0	18	2	24.5	2.38048	17.5	2.38048	28	6.48074
510	555 Sp0	GalNAca1-3(Fuca1-2)Galb1-4 GlcNAcb1-2Mana-Sp0	18.5	2.51661	27.25	2.98608	11.75	2.98608	36.75	8.46069
511	556 Sp0	Galb1-3GlcNAcb1-2Mana-Sp0	37.75	12.3119	39.75	13.8414	40.25	2.21736	48.75	3.5
512	557 Sp14	Gala1-3(Fuca1-2)Galb1-3GlcNAcb1-6GalNAc-Sp14	17.5	3	16.75	3.77492	13.75	3.30404	14	4.24264
513	558 Sp0	Neu5Aca2-3Galb1-3GlcNAcb1-2Mana-Sp0	16	4.69042	14.5	2.88675	20	5.59762	17.25	2.62996
514	559 Sp0	Gala1-3Galb1-3GlcNAcb1-2Mana-Sp0	24.75	6.65207	21.25	4.272	24.25	3.30404	29	2
515	560 Sp0	GalNAcb1-4GlcNAcb1-2Mana-Sp0	20.75	1.70783	15.25	2.36291	19.5	3.10913	15.5	0.57735
516	561 Sp0	Neu5Aca2-3Galb1-3GalNAcb1-4Galb1-4Glcb-Sp0	65	22.8473	116.25	16.2147	70	9.5219	153.25	21.8994
517	563 Sp21	GlcNAcb1-2 Mana1-6(GlcNAcb1-4)(GlcNAcb1-2Mana1-3)Manb1-4GlcNAcb1-4(Fuca1-6)GlcNAc-Sp21	19	2.16025	16.25	1.70783	12.5	5.19615	17.5	1.29099
518	564 Sp21	Galb1-4GlcNAcb1-2 Mana1-6(GlcNAcb1-4)(Galb1-4GlcNAcb1-2Mana1-3)Manb1-4GlcNAcb1-4(Fuca1-6)GlcNAc-Sp21	13.25	5.85235	10.75	3.0957	18	2	13.5	3
519	565 Sp21	Galb1-4GlcNAcb1-2 Mana1-6(Galb1-4GlcNAcb1-4)(Galb1-4GlcNAcb1-2Mana1-3)Manb1-4GlcNAcb1-4(Fuca1-6)GlcNAc-Sp21	15.5	3.10913	16.25	1.25831	13	2.94392	9.25	2.06155
520	566 Sp0	Fuca1-4(Galb1-3)GlcNAcb1-2 Mana-Sp0	105.25	4.57347	134	1.63299	81	19.4079	70.5	7.93725
521	567 Sp0	Neu5Aca2-3Galb1-4(Fuca1-3)GlcNAcb1-2Mana-Sp0	32	1.82574	45	5.47723	25.75	2.36291	32.25	2.98608
522	568 Sp0	GlcNAcb1-3Galb1-4GlcNAcb1-6(GlcNAcb1-3)Galb1-4GlcNAc-Sp0	12.75	0.957427	9	1.41421	11.5	3.10913	9.25	1.5
523	569 Sp21	GalNAca1-3(Fuca1-2)Galb1-3GalNAcb1-3Gala1-4Galb1-4Glc-Sp21	14.25	2.21736	12	1.41421	10.75	6.13052	7.5	1.73205
524	570 Sp21	Gala1-3(Fuca1-2)Galb1-3GalNAcb1-3Gala1-4Galb1-4Glc-Sp21	18.75	7.88987	13	1.41421	15.5	2.88675	10.5	1.29099
525	571 Sp21	Galb1-3GalNAcb1-3Gal-Sp21	32.25	6.84957	36.75	5.31507	22.75	2.21736	25.25	4.71699
526	572 Sp12	GlcNAcb1-3Galb1-4GlcNAcb1-2Mana1-6(GlcNAcb1-3Galb1-4GlcNAcb1-2Mana1-3)Manb1-4GlcNAcb1-4GlcNAcb-Sp12	23.5	1.29099	28.25	2.21736	22.5	3.31662	48.25	5.37742
527	572 Sp25	GlcNAcb1-3Galb1-4GlcNAcb1-2Mana1-6(GlcNAcb1-3Galb1-4GlcNAcb1-2Mana1-3)Manb1-4GlcNAcb1-4GlcNAcb-Sp25	42	2.16025	36	0.816497	42.75	3.30404	32.75	3.77492
528	573 Sp12	Galβ1-4GlcNAcβ1-3Galβ1-4GlcNAcβ1-2Manα1-6(Galβ1-4GlcNAcβ1-3Galβ1-4GlcNAcβ1-2Manα1-3)Manβ1-4GlcNAcβ1-4GlcNAcβ-Sp12	74.75	11.0868	112	20.0499	95.75	8.53913	353	27.7369
529	575 Sp24	Fuca1-2Galb1-4GlcNAcb1-3Galb1-4GlcNAcb1-2Mana1-6(Fuca1-2Galb1-4GlcNAcb1-3Galb1-4GlcNAcb1-2Mana1-3)Manb1-4GlcNAcb1-4GlcNAcb-Sp24	62.75	2.75379	66.25	2.75379	58.75	1.5	79.5	1.73205
530	576 Sp12	GlcNAcb1-3Galb1-4GlcNAcb1-3Galb1-4GlcNAcb1-2Mana1-6(GlcNAcb1-3Galb1-4GlcNAcb1-3Galb1-4GlcNAcb1-2Mana1-3)Manb1-4GlcNAcb1-4GlcNAcb-Sp12	45.5	2.08167	52	1.41421	42.75	4.64579	78.75	6.65207
531	577 Sp12	Galb1-4GlcNAcb1-3Galb1-4GlcNAcb1-3Galb1-4GlcNAcb1-2Mana1-6(Galb1-4GlcNAcb1-3Galb1-4GlcNAcb1-3Galb1-4GlcNAcb1-2Mana1-3)Manb1-4GlcNAcb1-4GlcNAcb-Sp12	52.75	1.25831	50.75	2.5	62.75	2.98608	59.75	6.18466
532	580 Sp25	Galb1-3GlcNAcb1-3Galb1-4GlcNAcb1-2Mana1-6(Galb1-3GlcNAcb1-3Galb1-4GlcNAcb1-2Mana1-3)Manb1-4GlcNAcb1-4GlcNAc-Sp25	38	4.24264	41.75	2.62996	35.75	6.29153	51.75	3.77492
533	581 Sp0	Neu5Gca2-8Neu5Gca2-3Galb1-4GlcNAc-Sp0	12.25	6.39661	13.5	7.32575	22.75	3.0957	27.25	4.272
534	582 Sp0	Neu5Aca2-8Neu5Gca2-3Galb1-4GlcNAc-Sp0	20.25	2.62996	31.5	20.4042	25.25	1.89297	29.75	3.5
535	583 Sp0	Neu5Gca2-8Neu5Aca2-3Galb1-4GlcNAc-Sp0	14.25	5.56028	24.25	6.39661	25.25	1.5	31.25	6.89807
536	584 Sp0	Neu5Gca2-8Neu5Gca2-3Galb1-4GlcNAcb1-3Galb1-4GlcNAc-Sp0	19.25	3.30404	27.25	10.4043	12.75	5.18813	11.5	6.245
537	585 Sp0	Neu5Gca2-8Neu5Gca2-6Galb1-4GlcNAc-Sp0	12	2.58199	24	6.48074	25.75	6.39661	32.25	2.75379
538	586 Sp0	Neu5Aca2-8Neu5Aca2-3Galb1-4GlcNAc-Sp0	21.5	1.73205	28.5	12.261	25.75	18.536	11	4.24264
539	587 Sp24	GlcNAcb1-3Galb1-4GlcNAcb1-6(GlcNAcb1-3Galb1-4GlcNAcb1-2)Mana1-6(GlcNAcb1-3Galb1-4GlcNAcb1-2Man a1-3)Manb1-4GlcNAcb1-4GlcNAc-Sp24	46.25	2.87228	59.75	2.87228	42.5	2.38048	60	9.93311
540	588 Sp24	Galb1-4GlcNAcb1-3Galb1-4GlcNAcb1-6(Galb1-4GlcNAcb1-3Galb1-4GlcNAcb1-2)Mana1-6(Galb1-4GlcNAcb1-3Galb1-4GlcNAcb1-2Mana1-3)Mana1-4GlcNAcb1-4GlcNAc-Sp24	42.5	1.29099	50.5	4.04145	60	4.83046	89.75	4.5
541	589 Sp24	Gala1-3Galb1-4GlcNAcb1-2Mana1-6(Gala1-3Galb1-4GlcNAcb1-2Mana1-3)Manb1-4GlcNAcb1-4GlcNAc-Sp24	37.75	2.75379	34.5	2.08167	41	6.48074	34.25	4.272
542	590 Sp14	GlcNAcb1-3Galb1-4GlcNAcb1-6(GlcNAcb1-3Galb1-3)GalNAca-Sp14	17.75	1.70783	14.5	1.73205	15.5	3.69685	14.5	3.10913
543	591 Sp0	GalNAcb1-3GlcNAcb-Sp0	18.75	1.89297	16.5	1.29099	14.75	6.18466	11	4.16333
544	592 Sp0	GalNAcb1-4GlcNAcb1-3GalNAcb1-4GlcNAcb-Sp0	18	1.82574	15.75	2.36291	17.5	2.51661	13.25	3.30404
545	595 Sp14	GlcNAb1-3Galb1-3GalNAc-Sp14	11.25	2.06155	10.25	0.957427	22	16.7531	14.5	5.25991
546	596 Sp14	Galb1-3GlcNAcb1-6(Galb1-3)GalNAc-Sp14	81	8.60233	142	20.2485	25.75	1.70783	36.5	7
547	598 Sp0	(3S)GlcAb1-3Galb1-4GlcNAcb1-3Galb1-4Glc-Sp0	15	6.78233	16.25	5.37742	25	1.63299	41.75	7.63217
548	599 Sp0	(3S)GlcAb1-3Galb1-4GlcNAcb1-2Mana-Sp0	17.25	3.77492	12.5	1.29099	13	2.70801	12.5	1.29099
549	600 Sp24	Galb1-3GlcNAcb1-3Galb1-4GlcNAcb1-3Galb1-4GlcNAcb1-6(Galb1-3GlcNAcb1-3Galb1-4GlcNAcb1-3Galb1-4GlcNAb1-2)Mana1-6(Galb1-3GlcNAcb1-3Galb1-4GlcNAcb1-3Galb1-4GlcNAcb1-2Mana1-3)Manb1-4GlcNAcb1-4(Fuca1-6)GlcNAcb-Sp24	37	1.41421	37.75	1.5	38	2.58199	53	7.48331
550	601 Sp24	Galb1-3GlcNAcb1-3Galb1-4GlcNAcb1-6(Galb1-3GlcNAcb1-3Galb1-4GlcNAb1-2)Mana1-6(Galb1-3GlcNAcb1-3Galb1-4GlcNAcb1-2Mana1-3)Manb1-4GlcNAcb1-4(Fuca1-6)GlcNAcb-Sp24	46	6.78233	49	6.87992	49.75	4.5	47.5	5.32291
551	604 Sp24	Galb1-4GlcNAcb1-3Galb1-4GlcNAcb1-2Mana1-6(Galb1-4GlcNAcb1-3Galb1-4GlcNAcb1-2Mana1-3)Manb1-4GlcNAcb1-4(Fuca1-6)GlcNAcb-Sp24	37.25	2.21736	34	2	37.25	2.21736	30.25	1.5
552	618 Sp14	Galb1-4GlcNAcb1-3Galb1-4GlcNAcb1-3GalNAca-Sp14	17.5	8.1035	16.25	8.4212	19	0	24	1.41421
553	619 Sp14	Galb1-4GlcNAcb1-3Galb1-4GlcNAcb1-6(Galb1-3)GalNAca-Sp14	53.75	10.1119	88.75	16.5605	47.75	11.4419	52.75	6.60177
554	620 Sp14	Galb1-4GlcNAcb1-3Galb1-4GlcNAcb1-6(Galb1-4GlcNAcb1-3Galb1-4GlcNAcb1-3)GalNAca-Sp14	31.5	0.57735	29.75	1.5	28	0.816497	28.5	1.91485
555	622 Sp14	GlcNAcb1-3Galb1-4GlcNAcb1-3GalNAca-Sp14	17.25	3.59398	16	2.58199	13.5	3.31662	14.5	5.06623
556	623 Sp14	GlcNAcb1-3Galb1-4GlcNAcb1-6(Galb1-3)GalNAca-Sp14	265.25	23.796	420.25	10.9659	89.5	9.67815	86.5	1.29099
557	624 Sp14	GlcNAcb1-3Galb1-4GlcNAcb1-6(GlcNAcb1-3Galb1-4GlcNAcb1-3)GalNAca-Sp14	20.75	7.88987	19.5	5.50757	25	1.41421	24.75	2.98608
558	627 Sp14	GlcNAcb1-3Galb1-4GlcNAcb1-3Galb1-4GlcNAcb1-3GalNAca-Sp14	12	5.47723	13.5	6.65833	15.5	3.10913	16	1.41421
559	628 Sp14	Galb1-4GlcNAcb1-3Galb1-3GalNAca-Sp14	7.25	4.272	8.25	6.18466	17.75	8.46069	14	4.32049
560	632 Sp14	Neu5Aca2-6Galb1-4GlcNAcb1-6(Galb1-3)GalNAca-Sp14	41	1.82574	51.5	5.44671	33.5	4.20317	31.25	1.89297
561	634 Sp14	GlcNAcb1-6(Neu5Aca2-3Galb1-3)GalNAca-Sp14	36	7.57188	39.5	7.76745	380	68.3813	655.25	101.066
562	640 Sp21	Galb1-3GalNAcb1-4(Neu5Aca2-8Neu5Aca2-8Neu5Aca2-3)Galb1-4Glcb-Sp21	30.25	5.37742	28	7.78888	25.75	5.90903	23.5	4.50925

## Sheet: Table S2
Table S2: Mutant enrichment score: Data are provided for 1st round (negative and 1st positive samples) and 2nd round (2nd positive sample) sorted samples
Mutations	Before sort read	Neg. read	1st Pos. read	2nd Pos. read	Neg. enrichment	1st Pos. enrichment	2nd Pos. enrichment	Enrichment score
S271N/T272P	24	3	51	129	0.329171	3.73893	10.3221	117.245
A312K/F313I	72	3	90	103	0.109724	2.19937	2.74724	55.0674
A312I/F313S	277	24	211	550	0.228162	1.34027	3.81307	22.3987
A312I/F313K	17	4	37	26	0.619615	3.82949	2.93708	18.1524
S271T/T272F	129	20	171	189	0.408274	2.33235	2.81361	16.0734
S271F/T272D	56	9	52	113	0.423219	1.63382	3.87509	14.9596
Total reads	1098184	417027	624147	571852	-	-	-	-

## Sheet: Table S3
Table S3: Details of tissue microarray staining by sCore2
Tissue	sCore2 staining	Negative control staining		sCore2 staining
Breast epithelium	Apical cytoplasm of glands	No		>50% staining
Breast cancer 1	Cytoplasm	No		20-50% staining
Breast cancer 2	Glandular/follicular apical lumen	No		<20% staining
Heart myocardium	Capillary endothelium	No		No or rare specific staining
Adrenal gland, medulla	Granules	Stained
Salivary gland (parotid)	No specific staining	No		Negative control staining
Thyroid	cytoplasm	No		No or little staining
Gastric mucosa, antral	Inflammatory cells	No		Staining similar to sCore2
Colon, mucosa	No specific staining	No
Amniotic membrane	No specific staining	No
Placenta, villi	No specific staining	No
Alveoli	No specific staining	No
Anus, mucosa	Cytoplasm and nuclear	Stained
Ectocervix	Squamous epithelial cytoplasm, apical cytoplasm	No
Endocervix	Apical glandular cytoplasm	No
Endometrium, secretory	Apical cytoplasm	No
fallopian tube	Endothelial vascular, apical cytoplasm	No
Ovary, 1º oocyte	No specific staining	No
Ovary mesothelium	Endothelial cells, cytoplasmic inflammatory cells	No
Seminiferous tubules	No specific staining	No
Epididymis	Glandular cytoplasm	No
Seminal vesicles	Cytoplasm	No
Prostate	Stroma	No
Skeletal muscle	No specific staining	No
Smooth muscle, intestine	No specific staining	No
Smooth muscle, uterus	No specific staining	No
Gallbladder	Glandular nuclear and endothelial cytoplasm, stroma, inflammatory cells	Little
Liver	Cytoplasmic granules, endothelial cells, inflammatory cells	Not for inflammatory cells
Pancreas	Cytoplasm	No
Lymph node	Stroma	No
Spleen	Cytoplasmic red pulp sinusoidal cells	No
Thymus	Cytoplasm	No
Cerebral cortex	Granular neuropil	Little
White matter (subcortical)	Granular neuropil	Little
Peripheral nerve	No specific staining	No
Skin, squamous epithelium	Basalis cytoplasm	Stained
Synovium	Matrices	Little
Kidney, cortex	distal tubular cytoplasm	No
Bladder, transitional epithelium	No specific staining	No

## Sheet: Table S4
Table S4: Primers used in this study
Primer Name	Purpose	Sequence (5' - 3')
AgeI6HisFcFWD	Cloning of Fc-pST3Gal1 constructs	ACGTCGACCGGTCACCATCATCATCATCATCAGGCCACCGAATATGAGTACCTAG
tST3GalI5xGSFcREV		CAGCGGGTACAGGTGCACGGGCGAGAGCCGGAACCGCTACCAGAGCCGCTACCTTTACCCGGAGACAGGGAGAGGCTC
5xGStST3GalIFWD		GGTAGCGGCTCTGGTAGCGGTTCCGGCTCTCGCCCGTGCACCTGTACCCGCTGC
BstBISbfIStoptST3GalIREV		ACGTCATTCGAACCTGCAGGTCAACGACCTTTGAAAATACGAATTTTGTTAATGCTCGCC
H302A_FWD	Cloning of Fc-pST3Gal1 H302A	CTGGCACGCGTATTGGGAAAACAATCCATCTGCGG
H302A_REV		CAATACGCGTGCCAGTTACCTTTAGAATCGGC
Q108A_FWD	Cloning of Fc-pST3Gal1 Dead	TTACGCCTGGCGCGTGAGAAACAG
Q108A_REV		TTCTCACGCGCCAGGCGTAACC
Y233A_FWD		TCTCATACGGCGGTTCCGGTGCC
Y233A_REV		ACCGGAACCGCCGTATGAGAAATACGGC
Y269F_FWD		CCACGGTCGTTTTCCGTCTACG
Y269F_REV		TAGACGGAAAACGACCGTGGC
pCSCGtermFWD	PCR amplification of pCSCG vector backbone	TGACCTGCAGGTTCGAAAACC
pCSCG19FcREV		AGAGCCGGAACCGCTACC
5GSCBM40FWD	Cloning of Fc-CBM40 and Fc-diCBM40	AGCGGTTCCGGCTCTTTAAGTTCACTAGGAGAATATAAGGATATAAATTTAGAAAGTTCAAATGC
CBM40termREV		CGAACCTGCAGGTCATTTTGTCTCTCCAGTCTTACTAAGTAAATAATCATCG
diCBM40FWD		GAACGGCAGCGAGCTCGGCAGCGGCAGCGGCTTAAGTTCACTAGGAGAATATAAGGATATAAATTTAGAAAGTTCAAATGC
diCBM40REV		CGAGCTCGCTGCCGTTCAGCGCTTTTGTCTCTCCAGTCTTACTAAGTAAATAATCATCG
GCNT1_1st_FWD	1st PCR amplification for amplicon sequencing of GOI (GCNT1, SLC35A1, ST3Gal1) from HEK293T isogenic KO cells	TCGTCGGCAGCGTCAGATGTGTATAAGAGACAGTTGGAGCATAGAAGACTGCC
GCNT1_1st_REV		GTCTCGTGGGCTCGGAGATGTGTATAAGAGACAGTTTTGGATTTCATTTACATCACCCTGTAAAAC
SLC35A1_1st_FWD		TCGTCGGCAGCGTCAGATGTGTATAAGAGACAGTGTTGCACGTATTTTCCAGACAATG
SLC35A1_1st_REV		GTCTCGTGGGCTCGGAGATGTGTATAAGAGACAGAAGTATTTATACTCACTTAGCTAAAATTCCCACAC
ST3Gal1_1st_FWD		TCGTCGGCAGCGTCAGATGTGTATAAGAGACAGCCACTCTCAGTCCACACC
ST3Gal1_1st_REV		GTCTCGTGGGCTCGGAGATGTGTATAAGAGACAGCCTGAAAGTGCTCACCTTCC
Glycolib_U6_FWD	1st PCR amplification for sgRNA enrichment of HL60 glycoCRISPR library	TCGTCGGCAGCGTCTTATATATCCCTATCAGTGATAGAGACACCG
Glycolib_Nextera_REV		GTCTCGTGGGCTCGGAGATGTGTATAAGAGACAGTCTTTAGTTTGTATGTCTGTTGCTATTATGTCTACTATTCTTTCC
DPP4TEMP2FWD	Cloning of surface-display form of Fc-pST3Gal1	ACCGTCAGATCCGCTAGCGCCGCCACCATGAAGACACCGTGGAAGACCGGTG
DPP4TEMP2REV		GTGGGCATGTTCTAGACAGCAGAACCACGGGCACGGTGATGATGGTGACAAG
TEMP2		AAGACACCGTGGAAGACCGGTGTTCTTCTGGGACTGCTGGGTGCTGCTGCGCTTGTCACCATCATCACCGTGCCC
31MutaVec_FWD	PCR amplification of vector backbone for pST3Gal1 library cloning	ACCTGCAGGTTCGAAAACCTGTACTTCCAGG
31MutaVec_REV		GGAAGAGCTCGCGGATCGTATCATTCAGG
31MutaIns_FWD	PCR amplification of mutagenic insert for pST3Gal1 library cloning	GATACGATCCGCGAGCTCTTCCAAGTGGTGC
31MutaIns_REV		ACAGGTTTTCGAACCTGCAGGTCAACGACCTTTG
N150X_REV	Cloning of mutagenic insert for pST3Gal1 Lib1	CTTTCTTTCAGGTTACCAGAMNNGCCCACCACGGCGCAGCGGC
N173X_REV		AAACCTTCGGTCGGCGCTTTMNNCATACGCAGAACGAAGTCATG
Y194XS197X_REV		TCTTGCGCTAATTCACGGAAMNNTTCCGGMNNAACAAAATGATGCGTGGTTTTG
S271XT272X_FWD	Cloning of mutagenic insert for pST3Gal1 Lib2	AGGGCCACGGTCGTTATCCGNNKNNKGGCATCCTGAGCGTGATTTTTAG
H302X_FWD		ATTCTAAAGGTAACTGGCACNNKTATTGGGAAAACAATCCATC
A312XF313X_FWD		AAAACAATCCATCTGCGGGTNNKNNKCGCAAGACCGGCGTTCATGATG
R314XK315X_FWD		ATCCATCTGCGGGTGCGTTTNNKNNKACCGGCGTTCATGATGGTGATTTC
T316X_FWD		CTGCGGGTGCGTTTCGCAAGNNKGGCGTTCATGATGGTGATTTC
31MutaNGS1stAmp_FWD	1st PCR amplification for pST3Gal1 mutant enrichment of Lib1	TCGTCGGCAGCGTCAGATGTGTATAAGAGACAGCTGGAAAAACGCTTAGTGTCTTGTCG
31MutaNGS1stAmp_REV		GTCTCGTGGGCTCGGAGATGTGTATAAGAGACAGGCTCACTTCTTGCGCTAATTCACG
31MutaNGS2ndAmp_FWD	1st PCR amplification for pST3Gal1 mutant enrichment of Lib2	TCGTCGGCAGCGTCAGATGTGTATAAGAGACAGGCAGGGCCACGGTCGTTATC
31MutaNGS2ndAmp_REV		GTCTCGTGGGCTCGGAGATGTGTATAAGAGACAGGGTAACATTAGACTCGAAATCACCATCATGAACG
S271N/T272P_FWD	Cloning of Fc-pST3Gal1 H302A/S271N/T272P	TCGTTATCCGAACCCGGGCATCCTGAGCGTG
S271N/T272P_REV		ATGCCCGGGTTCGGATAACGACCGTGG
S271T/T272F_FWD	Cloning of Fc-pST3Gal1 H302A/S271T/T272F	TCGTTATCCGACGTTCGGCATCCTGAGCGTG
S271T/T272F_REV		ATGCCGAACGTCGGATAACGACCGTGG
S271F/T272D_FWD	Cloning of Fc-pST3Gal1 H302A/S271F/T272D	TCGTTATCCGTTCGATGGCATCCTGAGCGTG
S271F/T272D_REV		ATGCCATCGAACGGATAACGACCGTGG
A312K/F313I_FWD	Cloning of Fc-pST3Gal1 H302A/A312K/F313I	TGCGGGTAAAATTCGCAAGACCGGCGTTC
A312K/F313I_REV		TCTTGCGAATTTTACCCGCAGATGGATTGTTTTC
A312I/F313S_FWD	Cloning of Fc-pST3Gal1 H302A/A312I/F313S	TGCGGGTATTAGCCGCAAGACCGGCGTTC
A312I/F313S_REV		TCTTGCGGCTAATACCCGCAGATGGATTGTTTTC
A312I/F313K_FWD	Cloning of Fc-pST3Gal1 H302A/A312I/F313K	TGCGGGTATTAAACGCAAGACCGGCGTTC
A312I/F313K_REV		TCTTGCGTTTAATACCCGCAGATGGATTGTTTTC
