# Supplementary material for: Engineering glycosyltransferases into glycan binding proteins using a novel mammalian surface display platform
Source: Research Square preprint supplement (doi:10.21203/rs.3.rs-5004188/v1), 2025-05-02
Supplement: Supplementary file 2 [file b988615912253606ef62dee2.xlsx]

## Sheet: Fig. 1c
Fig. 1c
Western blot showing the expression of soluble Fc-pST3Gal1 variants
Image was flipped horizontally, brightness was adjusted using ImageJ, and then split into two images

## Sheet: Fig. 1d
Fig. 1d
Scatter plots showing LC-MS/MS analysis of Fc-pST3Gal1 enzymatic activity
Raw data of time (first column of each sample & compound) and intensity (second column of each sample & compound) starts from Row15
Raw intensity was normalized by dividing each intensity data point by the maximum intensity of each sample & compound, shown in third column of each sample & compound
Normalized intensity was added by some numbers to incorporate all plots into one graph (e.g. 4.2 was added for sample PBS & Product), shown in fourth column of each sample & compound.
Sample name	PBS				PBS				PBS				rhST3Gal1				rhST3Gal1				rhST3Gal1				Fc-pST3Gal1 WT				Fc-pST3Gal1 WT				Fc-pST3Gal1 WT				Fc-pST3Gal1 H302A				Fc-pST3Gal1 H302A				Fc-pST3Gal1 H302A				Fc-pST3Gal1 Q108A/Y233A/Y269F
Compound extracted	CMP-Neu5Ac				Acceptor				Product				CMP-Neu5Ac				Acceptor				Product				CMP-Neu5Ac				Acceptor				Product				CMP-Neu5Ac				Acceptor				Product				CMP-Neu5Ac
MW	615.155				505.167				796.262				615.155				505.167				796.262				615.155				505.167				796.262				615.155				505.167				796.262				615.155
	CHROMATOGRAM				CHROMATOGRAM				CHROMATOGRAM				CHROMATOGRAM				CHROMATOGRAM				CHROMATOGRAM				CHROMATOGRAM				CHROMATOGRAM				CHROMATOGRAM				CHROMATOGRAM				CHROMATOGRAM				CHROMATOGRAM				CHROMATOGRAM
	pbs.raw				pbs.raw				pbs.raw				rhst3.raw				rhst3.raw				rhst3.raw				WT.raw				WT.raw				WT.raw				H3O2.raw				H3O2.raw				H3O2.raw				Dead.raw
	Data points: 11782				Data points: 11782				Data points: 11782				Data points: 11771				Data points: 11771				Data points: 11771				Data points: 11747				Data points: 11747				Data points: 11747				Data points: 11872				Data points: 11872				Data points: 11872				Data points: 11713
	Time	Intensity			Time	Intensity			Time	Intensity			Time	Intensity			Time	Intensity			Time	Intensity			Time	Intensity			Time	Intensity			Time	Intensity			Time	Intensity			Time	Intensity			Time	Intensity			Time
	0.00681472	0	0	4	0.00681472	0	0	4.1	0.00681472	0	0	4.2	0.00681848	0	0	3	0.00681848	0	0	3.1	0.00681848	0	0	3.2	0.00681896	0	0	2	0.00681896	0	0	2.1	0.00681896	0	0	2.2	0.00682058	0	0	1	0.00682058	0	0	1.1	0.00682058	0	0	1.2	0.00681643
	0.0133226	0	0	4	0.0133226	0	0	4.1	0.0133226	0	0	4.2	0.0134284	0	0	3	0.0134284	0	0	3.1	0.0134284	0	0	3.2	0.0133309	0	0	2	0.0133309	0	0	2.1	0.0133309	0	0	2.2	0.01337	0	0	1	0.01337	0	0	1.1	0.01337	0	0	1.2	0.0136867
	0.0145788	0	0	4	0.0145788	0	0	4.1	0.0145788	0	0	4.2	0.0146848	0	0	3	0.0146848	0	0	3.1	0.0146848	0	0	3.2	0.0145873	0	0	2	0.0145873	0	0	2.1	0.0145873	0	0	2.2	0.0146264	0	0	1	0.0146264	0	0	1.1	0.0146264	0	0	1.2	0.0150888
	0.0160517	0	0	4	0.0160517	0	0	4.1	0.0160517	0	0	4.2	0.0159681	0	0	3	0.0159681	0	0	3.1	0.0159681	0	0	3.2	0.0160748	0	0	2	0.0160748	0	0	2.1	0.0160748	0	0	2.2	0.0161139	0	0	1	0.0161139	0	0	1.1	0.0161139	0	0	1.2	0.0165743
	0.0172564	0	0	4	0.0172564	0	0	4.1	0.0172564	0	0	4.2	0.0171726	0	0	3	0.0171726	0	0	3.1	0.0171726	0	0	3.2	0.0172793	0	0	2	0.0172793	0	0	2.1	0.0172793	0	0	2.2	0.0173206	0	0	1	0.0173206	0	0	1.1	0.0173206	0	0	1.2	0.0177789
	0.0217669	0	0	4	0.0217669	0	0	4.1	0.0217669	0	0	4.2	0.0216829	0	0	3	0.0216829	0	0	3.1	0.0216829	0	0	3.2	0.0217897	0	0	2	0.0217897	0	0	2.1	0.0217897	0	0	2.2	0.0218288	0	0	1	0.0218288	0	0	1.1	0.0218288	0	0	1.2	0.0222871
	0.0232517	0	0	4	0.0232517	0	0	4.1	0.0232517	0	0	4.2	0.0231617	0	0	3	0.0231617	0	0	3.1	0.0231617	0	0	3.2	0.0232746	0	0	2	0.0232746	0	0	2.1	0.0232746	0	0	2.2	0.0233138	0	0	1	0.0233138	0	0	1.1	0.0233138	0	0	1.2	0.0237805
	0.0247391	0	0	4	0.0247391	0	0	4.1	0.0247391	0	0	4.2	0.0246471	0	0	3	0.0246471	0	0	3.1	0.0246471	0	0	3.2	0.0247601	0	0	2	0.0247601	0	0	2.1	0.0247601	0	0	2.2	0.0247992	0	0	1	0.0247992	0	0	1.1	0.0247992	0	0	1.2	0.0252701
	0.0259438	0	0	4	0.0259438	0	0	4.1	0.0259438	0	0	4.2	0.0258518	0	0	3	0.0258518	0	0	3.1	0.0258518	0	0	3.2	0.0259647	0	0	2	0.0259647	0	0	2.1	0.0259647	0	0	2.2	0.0260059	0	0	1	0.0260059	0	0	1.1	0.0260059	0	0	1.2	0.0264746
	0.0304521	0	0	4	0.0304521	0	0	4.1	0.0304521	0	0	4.2	0.03036	0	0	3	0.03036	0	0	3.1	0.03036	0	0	3.2	0.0304751	0	0	2	0.0304751	0	0	2.1	0.0304751	0	0	2.2	0.0305142	0	0	1	0.0305142	0	0	1.1	0.0305142	0	0	1.2	0.0309829
	0.0318809	0	0	4	0.0318809	0	0	4.1	0.0318809	0	0	4.2	0.0317388	0	0	3	0.0317388	0	0	3.1	0.0317388	0	0	3.2	0.0318434	0	0	2	0.0318434	0	0	2.1	0.0318434	0	0	2.2	0.031843	0	0	1	0.031843	0	0	1.1	0.031843	0	0	1.2	0.0324722
	0.0333663	0	0	4	0.0333663	0	0	4.1	0.0333663	0	0	4.2	0.0332243	0	0	3	0.0332243	0	0	3.1	0.0332243	0	0	3.2	0.033329	0	0	2	0.033329	0	0	2.1	0.033329	0	0	2.2	0.0333285	0	0	1	0.0333285	0	0	1.1	0.0333285	0	0	1.2	0.0339597
	0.0345732	0	0	4	0.0345732	0	0	4.1	0.0345732	0	0	4.2	0.0344289	0	0	3	0.0344289	0	0	3.1	0.0344289	0	0	3.2	0.0345336	0	0	2	0.0345336	0	0	2.1	0.0345336	0	0	2.2	0.0345331	0	0	1	0.0345331	0	0	1.1	0.0345331	0	0	1.2	0.0351644
	0.0390812	0	0	4	0.0390812	0	0	4.1	0.0390812	0	0	4.2	0.038939	0	0	3	0.038939	0	0	3.1	0.038939	0	0	3.2	0.0390438	0	0	2	0.0390438	0	0	2.1	0.0390438	0	0	2.2	0.0390434	0	0	1	0.0390434	0	0	1.1	0.0390434	0	0	1.2	0.0396747
	0.0405663	0	0	4	0.0405663	0	0	4.1	0.0405663	0	0	4.2	0.0404284	0	0	3	0.0404284	0	0	3.1	0.0404284	0	0	3.2	0.0405289	0	0	2	0.0405289	0	0	2.1	0.0405289	0	0	2.2	0.0405284	0	0	1	0.0405284	0	0	1.1	0.0405284	0	0	1.2	0.0411618
	0.0420538	0	0	4	0.0420538	0	0	4.1	0.0420538	0	0	4.2	0.0419159	0	0	3	0.0419159	0	0	3.1	0.0419159	0	0	3.2	0.0420164	0	0	2	0.0420164	0	0	2.1	0.0420164	0	0	2.2	0.0420139	0	0	1	0.0420139	0	0	1.1	0.0420139	0	0	1.2	0.0426493
	0.0432584	0	0	4	0.0432584	0	0	4.1	0.0432584	0	0	4.2	0.0431206	0	0	3	0.0431206	0	0	3.1	0.0431206	0	0	3.2	0.043221	0	0	2	0.043221	0	0	2.1	0.043221	0	0	2.2	0.0432207	0	0	1	0.0432207	0	0	1.1	0.0432207	0	0	1.2	0.0438539
	0.0477665	0	0	4	0.0477665	0	0	4.1	0.0477665	0	0	4.2	0.0476287	0	0	3	0.0476287	0	0	3.1	0.0476287	0	0	3.2	0.0477313	0	0	2	0.0477313	0	0	2.1	0.0477313	0	0	2.2	0.0477287	0	0	1	0.0477287	0	0	1.1	0.0477287	0	0	1.2	0.048362
	0.0492539	0	0	4	0.0492539	0	0	4.1	0.0492539	0	0	4.2	0.0491242	0	0	3	0.0491242	0	0	3.1	0.0491242	0	0	3.2	0.0492183	0	0	2	0.0492183	0	0	2.1	0.0492183	0	0	2.2	0.0492139	0	0	1	0.0492139	0	0	1.1	0.0492139	0	0	1.2	0.0498472
	0.0507434	0	0	4	0.0507434	0	0	4.1	0.0507434	0	0	4.2	0.0506096	0	0	3	0.0506096	0	0	3.1	0.0506096	0	0	3.2	0.0507038	0	0	2	0.0507038	0	0	2.1	0.0507038	0	0	2.2	0.0506992	0	0	1	0.0506992	0	0	1.1	0.0506992	0	0	1.2	0.0513326
	0.051948	0	0	4	0.051948	0	0	4.1	0.051948	0	0	4.2	0.0518164	0	0	3	0.0518164	0	0	3.1	0.0518164	0	0	3.2	0.0519084	0	0	2	0.0519084	0	0	2.1	0.0519084	0	0	2.2	0.0519039	0	0	1	0.0519039	0	0	1.1	0.0519039	0	0	1.2	0.0525393
	0.0564582	0	0	4	0.0564582	0	0	4.1	0.0564582	0	0	4.2	0.0565534	0	0	3	0.0565534	0	0	3.1	0.0565534	0	0	3.2	0.0564186	0	0	2	0.0564186	0	0	2.1	0.0564186	0	0	2.2	0.0564141	0	0	1	0.0564141	0	0	1.1	0.0564141	0	0	1.2	0.0572765
	0.0579454	0	0	4	0.0579454	0	0	4.1	0.0579454	0	0	4.2	0.0580388	0	0	3	0.0580388	0	0	3.1	0.0580388	0	0	3.2	0.0579038	0	0	2	0.0579038	0	0	2.1	0.0579038	0	0	2.2	0.0578993	0	0	1	0.0578993	0	0	1.1	0.0578993	0	0	1.2	0.0587618
	0.0594309	0	0	4	0.0594309	0	0	4.1	0.0594309	0	0	4.2	0.0595243	0	0	3	0.0595243	0	0	3.1	0.0595243	0	0	3.2	0.0593892	0	0	2	0.0593892	0	0	2.1	0.0593892	0	0	2.2	0.0593847	0	0	1	0.0593847	0	0	1.1	0.0593847	0	0	1.2	0.0602473
	0.0606376	0	0	4	0.0606376	0	0	4.1	0.0606376	0	0	4.2	0.0615351	0	0	3	0.0615351	0	0	3.1	0.0615351	0	0	3.2	0.0605939	0	0	2	0.0605939	0	0	2.1	0.0605939	0	0	2.2	0.0605893	0	0	1	0.0605893	0	0	1.1	0.0605893	0	0	1.2	0.062256
	0.0651457	0	0	4	0.0651457	0	0	4.1	0.0651457	0	0	4.2	0.0660454	0	0	3	0.0660454	0	0	3.1	0.0660454	0	0	3.2	0.065102	0	0	2	0.065102	0	0	2.1	0.065102	0	0	2.2	0.0653264	0	0	1	0.0653264	0	0	1.1	0.0653264	0	0	1.2	0.0667642
	0.0666309	0	0	4	0.0666309	0	0	4.1	0.0666309	0	0	4.2	0.0675306	0	0	3	0.0675306	0	0	3.1	0.0675306	0	0	3.2	0.0665892	0	0	2	0.0665892	0	0	2.1	0.0665892	0	0	2.2	0.0668138	0	0	1	0.0668138	0	0	1.1	0.0668138	0	0	1.2	0.0682493
	0.0681163	0	0	4	0.0681163	0	0	4.1	0.0681163	0	0	4.2	0.069016	0	0	3	0.069016	0	0	3.1	0.069016	0	0	3.2	0.0680747	0	0	2	0.0680747	0	0	2.1	0.0680747	0	0	2.2	0.0683076	0	0	1	0.0683076	0	0	1.1	0.0683076	0	0	1.2	0.0697347
	0.0693209	0	0	4	0.0693209	0	0	4.1	0.0693209	0	0	4.2	0.0710225	0	0	3	0.0710225	0	0	3.1	0.0710225	0	0	3.2	0.0701149	0	0	2	0.0701149	0	0	2.1	0.0701149	0	0	2.2	0.0703415	0	0	1	0.0703415	0	0	1.1	0.0703415	0	0	1.2	0.0717227
	0.074058	0	0	4	0.074058	0	0	4.1	0.074058	0	0	4.2	0.0755328	0	0	3	0.0755328	0	0	3.1	0.0755328	0	0	3.2	0.0748518	0	0	2	0.0748518	0	0	2.1	0.0748518	0	0	2.2	0.0750806	0	0	1	0.0750806	0	0	1.1	0.0750806	0	0	1.2	0.0762329
	0.0755433	0	0	4	0.0755433	0	0	4.1	0.0755433	0	0	4.2	0.0770179	0	0	3	0.0770179	0	0	3.1	0.0770179	0	0	3.2	0.0763392	0	0	2	0.0763392	0	0	2.1	0.0763392	0	0	2.2	0.0765639	0	0	1	0.0765639	0	0	1.1	0.0765639	0	0	1.2	0.0777179
	0.0770288	0	0	4	0.0770288	0	0	4.1	0.0770288	0	0	4.2	0.0785034	0	0	3	0.0785034	0	0	3.1	0.0785034	0	0	3.2	0.0778246	0	0	2	0.0778246	0	0	2.1	0.0778246	0	0	2.2	0.0780492	0	0	1	0.0780492	0	0	1.1	0.0780492	0	0	1.2	0.0792035
	0.079073	0	0	4	0.079073	0	0	4.1	0.079073	0	0	4.2	0.0805101	0	0	3	0.0805101	0	0	3.1	0.0805101	0	0	3.2	0.0798543	0	0	2	0.0798543	0	0	2.1	0.0798543	0	0	2.2	0.0800748	0	0	1	0.0800748	0	0	1.1	0.0800748	0	0	1.2	0.0804082
	0.0838101	0	0	4	0.0838101	0	0	4.1	0.0838101	0	0	4.2	0.0850183	0	0	3	0.0850183	0	0	3.1	0.0850183	0	0	3.2	0.0843645	0	0	2	0.0843645	0	0	2.1	0.0843645	0	0	2.2	0.0848285	0	0	1	0.0848285	0	0	1.1	0.0848285	0	0	1.2	0.0851493
	0.0852956	0	0	4	0.0852956	0	0	4.1	0.0852956	0	0	4.2	0.0865034	0	0	3	0.0865034	0	0	3.1	0.0865034	0	0	3.2	0.0858519	0	0	2	0.0858519	0	0	2.1	0.0858519	0	0	2.2	0.0863139	0	0	1	0.0863139	0	0	1.1	0.0863139	0	0	1.2	0.0866368
	0.0867808	0	0	4	0.0867808	0	0	4.1	0.0867808	0	0	4.2	0.0879909	0	0	3	0.0879909	0	0	3.1	0.0879909	0	0	3.2	0.0873392	0	0	2	0.0873392	0	0	2.1	0.0873392	0	0	2.2	0.0878013	0	0	1	0.0878013	0	0	1.1	0.0878013	0	0	1.2	0.0881221
	0.0888168	0	0	4	0.0888168	0	0	4.1	0.0888168	0	0	4.2	0.0891957	0	0	3	0.0891957	0	0	3.1	0.0891957	0	0	3.2	0.0885439	0	0	2	0.0885439	0	0	2.1	0.0885439	0	0	2.2	0.0898227	0	0	1	0.0898227	0	0	1.1	0.0898227	0	0	1.2	0.090129
	0.0935539	0	0	4	0.0935539	0	0	4.1	0.0935539	0	0	4.2	0.0958889	0	0	3	0.0958889	0	0	3.1	0.0958889	0	0	3.2	0.0951685	0	0	2	0.0951685	0	0	2.1	0.0951685	0	0	2.2	0.0965077	0	0	1	0.0965077	0	0	1.1	0.0965077	0	0	1.2	0.0967556
	0.0950413	0	0	4	0.0950413	0	0	4.1	0.0950413	0	0	4.2	0.0973744	0	0	3	0.0973744	0	0	3.1	0.0973744	0	0	3.2	0.096654	0	0	2	0.096654	0	0	2.1	0.096654	0	0	2.2	0.0979952	0	0	1	0.0979952	0	0	1.1	0.0979952	0	0	1.2	0.098241
	0.0965288	0	0	4	0.0965288	0	0	4.1	0.0965288	0	0	4.2	0.0988576	0	0	3	0.0988576	0	0	3.1	0.0988576	0	0	3.2	0.0981414	0	0	2	0.0981414	0	0	2.1	0.0981414	0	0	2.2	0.0994805	0	0	1	0.0994805	0	0	1.1	0.0994805	0	0	1.2	0.0997264
	0.0985647	0	0	4	0.0985647	0	0	4.1	0.0985647	0	0	4.2	0.100064	0	0	3	0.100064	0	0	3.1	0.100064	0	0	3.2	0.099346	0	0	2	0.099346	0	0	2.1	0.099346	0	0	2.2	0.100685	0	0	1	0.100685	0	0	1.1	0.100685	0	0	1.2	0.100931
	0.103302	0	0	4	0.103302	0	0	4.1	0.103302	0	0	4.2	0.104803	0	0	3	0.104803	0	0	3.1	0.104803	0	0	3.2	0.104083	0	0	2	0.104083	0	0	2.1	0.104083	0	0	2.2	0.105422	0	0	1	0.105422	0	0	1.1	0.105422	0	0	1.2	0.105685
	0.104787	0	0	4	0.104787	0	0	4.1	0.104787	0	0	4.2	0.106289	0	0	3	0.106289	0	0	3.1	0.106289	0	0	3.2	0.105569	0	0	2	0.105569	0	0	2.1	0.105569	0	0	2.2	0.106908	0	0	1	0.106908	0	0	1.1	0.106908	0	0	1.2	0.10717
	0.106273	0	0	4	0.106273	0	0	4.1	0.106273	0	0	4.2	0.107789	0	0	3	0.107789	0	0	3.1	0.107789	0	0	3.2	0.107054	0	0	2	0.107054	0	0	2.1	0.107054	0	0	2.2	0.108393	0	0	1	0.108393	0	0	1.1	0.108393	0	0	1.2	0.108656
	0.108308	0	0	4	0.108308	0	0	4.1	0.108308	0	0	4.2	0.109819	0	0	3	0.109819	0	0	3.1	0.109819	0	0	3.2	0.109102	0	0	2	0.109102	0	0	2.1	0.109102	0	0	2.2	0.110444	0	0	1	0.110444	0	0	1.1	0.110444	0	0	1.2	0.110664
	0.113046	0	0	4	0.113046	0	0	4.1	0.113046	0	0	4.2	0.114558	0	0	3	0.114558	0	0	3.1	0.114558	0	0	3.2	0.113841	0	0	2	0.113841	0	0	2.1	0.113841	0	0	2.2	0.114952	0	0	1	0.114952	0	0	1.1	0.114952	0	0	1.2	0.115403
	0.114531	0	0	4	0.114531	0	0	4.1	0.114531	0	0	4.2	0.116041	0	0	3	0.116041	0	0	3.1	0.116041	0	0	3.2	0.115327	0	0	2	0.115327	0	0	2.1	0.115327	0	0	2.2	0.116439	0	0	1	0.116439	0	0	1.1	0.116439	0	0	1.2	0.116889
	0.116018	0	0	4	0.116018	0	0	4.1	0.116018	0	0	4.2	0.117526	0	0	3	0.117526	0	0	3.1	0.117526	0	0	3.2	0.116814	0	0	2	0.116814	0	0	2.1	0.116814	0	0	2.2	0.117926	0	0	1	0.117926	0	0	1.1	0.117926	0	0	1.2	0.118374
	0.118044	0	0	4	0.118044	0	0	4.1	0.118044	0	0	4.2	0.11955	0	0	3	0.11955	0	0	3.1	0.11955	0	0	3.2	0.118846	0	0	2	0.118846	0	0	2.1	0.118846	0	0	2.2	0.119131	0	0	1	0.119131	0	0	1.1	0.119131	0	0	1.2	0.120369
	0.122781	0	0	4	0.122781	0	0	4.1	0.122781	0	0	4.2	0.124304	0	0	3	0.124304	0	0	3.1	0.124304	0	0	3.2	0.123583	0	0	2	0.123583	0	0	2.1	0.123583	0	0	2.2	0.123868	0	0	1	0.123868	0	0	1.1	0.123868	0	0	1.2	0.125106
	0.124268	0	0	4	0.124268	0	0	4.1	0.124268	0	0	4.2	0.125791	0	0	3	0.125791	0	0	3.1	0.125791	0	0	3.2	0.125071	0	0	2	0.125071	0	0	2.1	0.125071	0	0	2.2	0.125353	0	0	1	0.125353	0	0	1.1	0.125353	0	0	1.2	0.126591
	0.125758	0	0	4	0.125758	0	0	4.1	0.125758	0	0	4.2	0.127276	0	0	3	0.127276	0	0	3.1	0.127276	0	0	3.2	0.126558	0	0	2	0.126558	0	0	2.1	0.126558	0	0	2.2	0.126841	0	0	1	0.126841	0	0	1.1	0.126841	0	0	1.2	0.128076
	0.127779	0	0	4	0.127779	0	0	4.1	0.127779	0	0	4.2	0.1293	0	0	3	0.1293	0	0	3.1	0.1293	0	0	3.2	0.128592	0	0	2	0.128592	0	0	2.1	0.128592	0	0	2.2	0.128887	0	0	1	0.128887	0	0	1.1	0.128887	0	0	1.2	0.130073
	0.13229	0	0	4	0.13229	0	0	4.1	0.13229	0	0	4.2	0.134039	0	0	3	0.134039	0	0	3.1	0.134039	0	0	3.2	0.133331	0	0	2	0.133331	0	0	2.1	0.133331	0	0	2.2	0.133627	0	0	1	0.133627	0	0	1.1	0.133627	0	0	1.2	0.134812
	0.133775	0	0	4	0.133775	0	0	4.1	0.133775	0	0	4.2	0.135524	0	0	3	0.135524	0	0	3.1	0.135524	0	0	3.2	0.134814	0	0	2	0.134814	0	0	2.1	0.134814	0	0	2.2	0.135112	0	0	1	0.135112	0	0	1.1	0.135112	0	0	1.2	0.136299
	0.13526	0	0	4	0.13526	0	0	4.1	0.13526	0	0	4.2	0.13701	0	0	3	0.13701	0	0	3.1	0.13701	0	0	3.2	0.1363	0	0	2	0.1363	0	0	2.1	0.1363	0	0	2.2	0.136599	0	0	1	0.136599	0	0	1.1	0.136599	0	0	1.2	0.137789
	0.136465	0	0	4	0.136465	0	0	4.1	0.136465	0	0	4.2	0.139031	0	0	3	0.139031	0	0	3.1	0.139031	0	0	3.2	0.138329	0	0	2	0.138329	0	0	2.1	0.138329	0	0	2.2	0.138631	0	0	1	0.138631	0	0	1.1	0.138631	0	0	1.2	0.139781
	0.140975	0	0	4	0.140975	0	0	4.1	0.140975	0	0	4.2	0.143768	0	0	3	0.143768	0	0	3.1	0.143768	0	0	3.2	0.143069	0	0	2	0.143069	0	0	2.1	0.143069	0	0	2.2	0.143368	0	0	1	0.143368	0	0	1.1	0.143368	0	0	1.2	0.14452
	0.14246	0	0	4	0.14246	0	0	4.1	0.14246	0	0	4.2	0.145256	0	0	3	0.145256	0	0	3.1	0.145256	0	0	3.2	0.144554	0	0	2	0.144554	0	0	2.1	0.144554	0	0	2.2	0.144856	0	0	1	0.144856	0	0	1.1	0.144856	0	0	1.2	0.146004
	0.143948	0	0	4	0.143948	0	0	4.1	0.143948	0	0	4.2	0.146743	0	0	3	0.146743	0	0	3.1	0.146743	0	0	3.2	0.146039	0	0	2	0.146039	0	0	2.1	0.146039	0	0	2.2	0.146341	0	0	1	0.146341	0	0	1.1	0.146341	0	0	1.2	0.147491
	0.145979	0	0	4	0.145979	0	0	4.1	0.145979	0	0	4.2	0.148764	0	0	3	0.148764	0	0	3.1	0.148764	0	0	3.2	0.148075	0	0	2	0.148075	0	0	2.1	0.148075	0	0	2.2	0.148379	0	0	1	0.148379	0	0	1.1	0.148379	0	0	1.2	0.149485
	0.150488	0	0	4	0.150488	0	0	4.1	0.150488	0	0	4.2	0.153504	0	0	3	0.153504	0	0	3.1	0.153504	0	0	3.2	0.152812	0	0	2	0.152812	0	0	2.1	0.152812	0	0	2.2	0.153118	0	0	1	0.153118	0	0	1.1	0.153118	0	0	1.2	0.154222
	0.151973	0	0	4	0.151973	0	0	4.1	0.151973	0	0	4.2	0.154989	0	0	3	0.154989	0	0	3.1	0.154989	0	0	3.2	0.154298	0	0	2	0.154298	0	0	2.1	0.154298	0	0	2.2	0.154606	0	0	1	0.154606	0	0	1.1	0.154606	0	0	1.2	0.155708
	0.153458	0	0	4	0.153458	0	0	4.1	0.153458	0	0	4.2	0.156476	0	0	3	0.156476	0	0	3.1	0.156476	0	0	3.2	0.155783	0	0	2	0.155783	0	0	2.1	0.155783	0	0	2.2	0.156091	0	0	1	0.156091	0	0	1.1	0.156091	0	0	1.2	0.157193
	0.154663	0	0	4	0.154663	0	0	4.1	0.154663	0	0	4.2	0.158498	0	0	3	0.158498	0	0	3.1	0.158498	0	0	3.2	0.157819	0	0	2	0.157819	0	0	2.1	0.157819	0	0	2.2	0.158129	0	0	1	0.158129	0	0	1.1	0.158129	0	0	1.2	0.159196
	0.159402	0	0	4	0.159402	0	0	4.1	0.159402	0	0	4.2	0.163008	0	0	3	0.163008	0	0	3.1	0.163008	0	0	3.2	0.162328	0	0	2	0.162328	0	0	2.1	0.162328	0	0	2.2	0.162637	0	0	1	0.162637	0	0	1.1	0.162637	0	0	1.2	0.163704
	0.160885	0	0	4	0.160885	0	0	4.1	0.160885	0	0	4.2	0.164495	0	0	3	0.164495	0	0	3.1	0.164495	0	0	3.2	0.163814	0	0	2	0.163814	0	0	2.1	0.163814	0	0	2.2	0.164126	0	0	1	0.164126	0	0	1.1	0.164126	0	0	1.2	0.165191
	0.162371	0	0	4	0.162371	0	0	4.1	0.162371	0	0	4.2	0.165981	0	0	3	0.165981	0	0	3.1	0.165981	0	0	3.2	0.1653	0	0	2	0.1653	0	0	2.1	0.1653	0	0	2.2	0.165629	0	0	1	0.165629	0	0	1.1	0.165629	0	0	1.2	0.166676
	0.164396	0	0	4	0.164396	0	0	4.1	0.164396	0	0	4.2	0.167185	0	0	3	0.167185	0	0	3.1	0.167185	0	0	3.2	0.166504	0	0	2	0.166504	0	0	2.1	0.166504	0	0	2.2	0.166833	0	0	1	0.166833	0	0	1.1	0.166833	0	0	1.2	0.167881
	0.168904	0	0	4	0.168904	0	0	4.1	0.168904	0	0	4.2	0.171693	0	0	3	0.171693	0	0	3.1	0.171693	0	0	3.2	0.171015	0	0	2	0.171015	0	0	2.1	0.171015	0	0	2.2	0.171344	0	0	1	0.171344	0	0	1.1	0.171344	0	0	1.2	0.172391
	0.170396	0	0	4	0.170396	0	0	4.1	0.170396	0	0	4.2	0.173178	0	0	3	0.173178	0	0	3.1	0.173178	0	0	3.2	0.1725	0	0	2	0.1725	0	0	2.1	0.1725	0	0	2.2	0.172828	0	0	1	0.172828	0	0	1.1	0.172828	0	0	1.2	0.173647
	0.171881	0	0	4	0.171881	0	0	4.1	0.171881	0	0	4.2	0.174666	0	0	3	0.174666	0	0	3.1	0.174666	0	0	3.2	0.173985	0	0	2	0.173985	0	0	2.1	0.173985	0	0	2.2	0.174314	0	0	1	0.174314	0	0	1.1	0.174314	0	0	1.2	0.175137
	0.173086	0	0	4	0.173086	0	0	4.1	0.173086	0	0	4.2	0.175871	0	0	3	0.175871	0	0	3.1	0.175871	0	0	3.2	0.17519	0	0	2	0.17519	0	0	2.1	0.17519	0	0	2.2	0.175519	0	0	1	0.175519	0	0	1.1	0.175519	0	0	1.2	0.176341
	0.177594	0	0	4	0.177594	0	0	4.1	0.177594	0	0	4.2	0.181949	0	0	3	0.181949	0	0	3.1	0.181949	0	0	3.2	0.181544	0	0	2	0.181544	0	0	2.1	0.181544	0	0	2.2	0.181943	0	0	1	0.181943	0	0	1.1	0.181943	0	0	1.2	0.182787
	0.17885	0	0	4	0.17885	0	0	4.1	0.17885	0	0	4.2	0.183276	0	0	3	0.183276	0	0	3.1	0.183276	0	0	3.2	0.183033	0	0	2	0.183033	0	0	2.1	0.183033	0	0	2.2	0.183431	0	0	1	0.183431	0	0	1.1	0.183431	0	0	1.2	0.184174
	0.180152	0	0	4	0.180152	0	0	4.1	0.180152	0	0	4.2	0.184633	0	0	3	0.184633	0	0	3.1	0.184633	0	0	3.2	0.184521	0	0	2	0.184521	0	0	2.1	0.184521	0	0	2.2	0.184916	0	0	1	0.184916	0	0	1.1	0.184916	0	0	1.2	0.18566
	0.181357	0	0	4	0.181357	0	0	4.1	0.181357	0	0	4.2	0.185837	0	0	3	0.185837	0	0	3.1	0.185837	0	0	3.2	0.185725	0	0	2	0.185725	0	0	2.1	0.185725	0	0	2.2	0.186121	0	0	1	0.186121	0	0	1.1	0.186121	0	0	1.2	0.186866
	0.185865	0	0	4	0.185865	0	0	4.1	0.185865	0	0	4.2	0.190346	0	0	3	0.190346	0	0	3.1	0.190346	0	0	3.2	0.190236	0	0	2	0.190236	0	0	2.1	0.190236	0	0	2.2	0.190629	0	0	1	0.190629	0	0	1.1	0.190629	0	0	1.2	0.191375
	0.18735	0	0	4	0.18735	0	0	4.1	0.18735	0	0	4.2	0.191831	0	0	3	0.191831	0	0	3.1	0.191831	0	0	3.2	0.191737	0	0	2	0.191737	0	0	2.1	0.191737	0	0	2.2	0.192116	0	0	1	0.192116	0	0	1.1	0.192116	0	0	1.2	0.19286
	0.188835	0	0	4	0.188835	0	0	4.1	0.188835	0	0	4.2	0.193316	0	0	3	0.193316	0	0	3.1	0.193316	0	0	3.2	0.193223	0	0	2	0.193223	0	0	2.1	0.193223	0	0	2.2	0.193616	0	0	1	0.193616	0	0	1.1	0.193616	0	0	1.2	0.194345
	0.190042	0	0	4	0.190042	0	0	4.1	0.190042	0	0	4.2	0.194523	0	0	3	0.194523	0	0	3.1	0.194523	0	0	3.2	0.194429	0	0	2	0.194429	0	0	2.1	0.194429	0	0	2.2	0.194821	0	0	1	0.194821	0	0	1.1	0.194821	0	0	1.2	0.19555
	0.19455	0	0	4	0.19455	0	0	4.1	0.19455	0	0	4.2	0.199031	0	0	3	0.199031	0	0	3.1	0.199031	0	0	3.2	0.198938	0	0	2	0.198938	0	0	2.1	0.198938	0	0	2.2	0.199331	0	0	1	0.199331	0	0	1.1	0.199331	0	0	1.2	0.20006
	0.196035	0	0	4	0.196035	0	0	4.1	0.196035	0	0	4.2	0.200516	0	0	3	0.200516	0	0	3.1	0.200516	0	0	3.2	0.200423	0	0	2	0.200423	0	0	2.1	0.200423	0	0	2.2	0.200816	0	0	1	0.200816	0	0	1.1	0.200816	0	0	1.2	0.201545
	0.197521	0	0	4	0.197521	0	0	4.1	0.197521	0	0	4.2	0.202001	0	0	3	0.202001	0	0	3.1	0.202001	0	0	3.2	0.201908	0	0	2	0.201908	0	0	2.1	0.201908	0	0	2.2	0.202306	0	0	1	0.202306	0	0	1.1	0.202306	0	0	1.2	0.203031
	0.198725	0	0	4	0.198725	0	0	4.1	0.198725	0	0	4.2	0.203208	0	0	3	0.203208	0	0	3.1	0.203208	0	0	3.2	0.203113	0	0	2	0.203113	0	0	2.1	0.203113	0	0	2.2	0.20351	0	0	1	0.20351	0	0	1.1	0.20351	0	0	1.2	0.204235
	0.203235	0	0	4	0.203235	0	0	4.1	0.203235	0	0	4.2	0.207716	0	0	3	0.207716	0	0	3.1	0.207716	0	0	3.2	0.207623	0	0	2	0.207623	0	0	2.1	0.207623	0	0	2.2	0.208018	0	0	1	0.208018	0	0	1.1	0.208018	0	0	1.2	0.208745
	0.204721	0	0	4	0.204721	0	0	4.1	0.204721	0	0	4.2	0.209201	0	0	3	0.209201	0	0	3.1	0.209201	0	0	3.2	0.209108	0	0	2	0.209108	0	0	2.1	0.209108	0	0	2.2	0.209506	0	0	1	0.209506	0	0	1.1	0.209506	0	0	1.2	0.210231
	0.206206	0	0	4	0.206206	0	0	4.1	0.206206	0	0	4.2	0.210687	0	0	3	0.210687	0	0	3.1	0.210687	0	0	3.2	0.210593	0	0	2	0.210593	0	0	2.1	0.210593	0	0	2.2	0.210993	0	0	1	0.210993	0	0	1.1	0.210993	0	0	1.2	0.211716
	0.207411	0	0	4	0.207411	0	0	4.1	0.207411	0	0	4.2	0.211891	0	0	3	0.211891	0	0	3.1	0.211891	0	0	3.2	0.211798	0	0	2	0.211798	0	0	2.1	0.211798	0	0	2.2	0.213037	0	0	1	0.213037	0	0	1.1	0.213037	0	0	1.2	0.212921
	0.211919	0	0	4	0.211919	0	0	4.1	0.211919	0	0	4.2	0.216402	0	0	3	0.216402	0	0	3.1	0.216402	0	0	3.2	0.216306	0	0	2	0.216306	0	0	2.1	0.216306	0	0	2.2	0.217548	0	0	1	0.217548	0	0	1.1	0.217548	0	0	1.2	0.217668
	0.213406	0	0	4	0.213406	0	0	4.1	0.213406	0	0	4.2	0.217887	0	0	3	0.217887	0	0	3.1	0.217887	0	0	3.2	0.217794	0	0	2	0.217794	0	0	2.1	0.217794	0	0	2.2	0.219033	0	0	1	0.219033	0	0	1.1	0.219033	0	0	1.2	0.219158
	0.214891	0	0	4	0.214891	0	0	4.1	0.214891	0	0	4.2	0.21937	0	0	3	0.21937	0	0	3.1	0.21937	0	0	3.2	0.219279	0	0	2	0.219279	0	0	2.1	0.219279	0	0	2.2	0.220518	0	0	1	0.220518	0	0	1.1	0.220518	0	0	1.2	0.220643
	0.216096	0	0	4	0.216096	0	0	4.1	0.216096	0	0	4.2	0.220577	0	0	3	0.220577	0	0	3.1	0.220577	0	0	3.2	0.220484	0	0	2	0.220484	0	0	2.1	0.220484	0	0	2.2	0.221723	0	0	1	0.221723	0	0	1.1	0.221723	0	0	1.2	0.222669
	0.220606	0	0	4	0.220606	0	0	4.1	0.220606	0	0	4.2	0.225314	0	0	3	0.225314	0	0	3.1	0.225314	0	0	3.2	0.224994	0	0	2	0.224994	0	0	2.1	0.224994	0	0	2.2	0.226231	0	0	1	0.226231	0	0	1.1	0.226231	0	0	1.2	0.227177
	0.222093	0	0	4	0.222093	0	0	4.1	0.222093	0	0	4.2	0.226801	0	0	3	0.226801	0	0	3.1	0.226801	0	0	3.2	0.226479	0	0	2	0.226479	0	0	2.1	0.226479	0	0	2.2	0.227716	0	0	1	0.227716	0	0	1.1	0.227716	0	0	1.2	0.228662
	0.223579	0	0	4	0.223579	0	0	4.1	0.223579	0	0	4.2	0.228287	0	0	3	0.228287	0	0	3.1	0.228287	0	0	3.2	0.227962	0	0	2	0.227962	0	0	2.1	0.227962	0	0	2.2	0.229201	0	0	1	0.229201	0	0	1.1	0.229201	0	0	1.2	0.230149
	0.224786	0	0	4	0.224786	0	0	4.1	0.224786	0	0	4.2	0.230312	0	0	3	0.230312	0	0	3.1	0.230312	0	0	3.2	0.229169	0	0	2	0.229169	0	0	2.1	0.229169	0	0	2.2	0.231244	0	0	1	0.231244	0	0	1.1	0.231244	0	0	1.2	0.231354
	0.229294	0	0	4	0.229294	0	0	4.1	0.229294	0	0	4.2	0.23482	0	0	3	0.23482	0	0	3.1	0.23482	0	0	3.2	0.233677	0	0	2	0.233677	0	0	2.1	0.233677	0	0	2.2	0.235983	0	0	1	0.235983	0	0	1.1	0.235983	0	0	1.2	0.235862
	0.230779	0	0	4	0.230779	0	0	4.1	0.230779	0	0	4.2	0.236306	0	0	3	0.236306	0	0	3.1	0.236306	0	0	3.2	0.235162	0	0	2	0.235162	0	0	2.1	0.235162	0	0	2.2	0.23747	0	0	1	0.23747	0	0	1.1	0.23747	0	0	1.2	0.237349
	0.232264	0	0	4	0.232264	0	0	4.1	0.232264	0	0	4.2	0.237797	0	0	3	0.237797	0	0	3.1	0.237797	0	0	3.2	0.236648	0	0	2	0.236648	0	0	2.1	0.236648	0	0	2.2	0.238972	0	0	1	0.238972	0	0	1.1	0.238972	0	0	1.2	0.238835
	0.233471	0	0	4	0.233471	0	0	4.1	0.233471	0	0	4.2	0.239002	0	0	3	0.239002	0	0	3.1	0.239002	0	0	3.2	0.238686	0	0	2	0.238686	0	0	2.1	0.238686	0	0	2.2	0.241008	0	0	1	0.241008	0	0	1.1	0.241008	0	0	1.2	0.240039
	0.238208	0	0	4	0.238208	0	0	4.1	0.238208	0	0	4.2	0.24351	0	0	3	0.24351	0	0	3.1	0.24351	0	0	3.2	0.243194	0	0	2	0.243194	0	0	2.1	0.243194	0	0	2.2	0.245516	0	0	1	0.245516	0	0	1.1	0.245516	0	0	1.2	0.244776
	0.239694	0	0	4	0.239694	0	0	4.1	0.239694	0	0	4.2	0.244995	0	0	3	0.244995	0	0	3.1	0.244995	0	0	3.2	0.244683	0	0	2	0.244683	0	0	2.1	0.244683	0	0	2.2	0.247001	0	0	1	0.247001	0	0	1.1	0.247001	0	0	1.2	0.246264
	0.241179	0	0	4	0.241179	0	0	4.1	0.241179	0	0	4.2	0.246481	0	0	3	0.246481	0	0	3.1	0.246481	0	0	3.2	0.246166	0	0	2	0.246166	0	0	2.1	0.246166	0	0	2.2	0.248489	0	0	1	0.248489	0	0	1.1	0.248489	0	0	1.2	0.247749
	0.243206	0	0	4	0.243206	0	0	4.1	0.243206	0	0	4.2	0.247687	0	0	3	0.247687	0	0	3.1	0.247687	0	0	3.2	0.247373	0	0	2	0.247373	0	0	2.1	0.247373	0	0	2.2	0.249694	0	0	1	0.249694	0	0	1.1	0.249694	0	0	1.2	0.249767
	0.247717	0	0	4	0.247717	0	0	4.1	0.247717	0	0	4.2	0.252424	0	0	3	0.252424	0	0	3.1	0.252424	0	0	3.2	0.25211	0	0	2	0.25211	0	0	2.1	0.25211	0	0	2.2	0.254204	0	0	1	0.254204	0	0	1.1	0.254204	0	0	1.2	0.254275
	0.249202	0	0	4	0.249202	0	0	4.1	0.249202	0	0	4.2	0.25391	0	0	3	0.25391	0	0	3.1	0.25391	0	0	3.2	0.253596	0	0	2	0.253596	0	0	2.1	0.253596	0	0	2.2	0.255689	0	0	1	0.255689	0	0	1.1	0.255689	0	0	1.2	0.25576
	0.250689	0	0	4	0.250689	0	0	4.1	0.250689	0	0	4.2	0.255397	0	0	3	0.255397	0	0	3.1	0.255397	0	0	3.2	0.255081	0	0	2	0.255081	0	0	2.1	0.255081	0	0	2.2	0.257176	0	0	1	0.257176	0	0	1.1	0.257176	0	0	1.2	0.257245
	0.251894	0	0	4	0.251894	0	0	4.1	0.251894	0	0	4.2	0.257425	0	0	3	0.257425	0	0	3.1	0.257425	0	0	3.2	0.257115	0	0	2	0.257115	0	0	2.1	0.257115	0	0	2.2	0.259206	0	0	1	0.259206	0	0	1.1	0.259206	0	0	1.2	0.258452
	0.256402	0	0	4	0.256402	0	0	4.1	0.256402	0	0	4.2	0.264058	0	0	3	0.264058	0	0	3.1	0.264058	0	0	3.2	0.263748	0	0	2	0.263748	0	0	2.1	0.263748	0	0	2.2	0.265835	0	0	1	0.265835	0	0	1.1	0.265835	0	0	1.2	0.26507
	0.257889	0	0	4	0.257889	0	0	4.1	0.257889	0	0	4.2	0.265543	0	0	3	0.265543	0	0	3.1	0.265543	0	0	3.2	0.265235	0	0	2	0.265235	0	0	2.1	0.265235	0	0	2.2	0.26732	0	0	1	0.26732	0	0	1.1	0.26732	0	0	1.2	0.266558
	0.259375	0	0	4	0.259375	0	0	4.1	0.259375	0	0	4.2	0.267029	0	0	3	0.267029	0	0	3.1	0.267029	0	0	3.2	0.266725	0	0	2	0.266725	0	0	2.1	0.266725	0	0	2.2	0.268806	0	0	1	0.268806	0	0	1.1	0.268806	0	0	1.2	0.268043
	0.261404	0	0	4	0.261404	0	0	4.1	0.261404	0	0	4.2	0.268233	0	0	3	0.268233	0	0	3.1	0.268233	0	0	3.2	0.267929	0	0	2	0.267929	0	0	2.1	0.267929	0	0	2.2	0.27001	0	0	1	0.27001	0	0	1.1	0.27001	0	0	1.2	0.26925
	0.265913	0	0	4	0.265913	0	0	4.1	0.265913	0	0	4.2	0.272977	0	0	3	0.272977	0	0	3.1	0.272977	0	0	3.2	0.272667	0	0	2	0.272667	0	0	2.1	0.272667	0	0	2.2	0.274747	0	0	1	0.274747	0	0	1.1	0.274747	0	0	1.2	0.273758
	0.2674	0	0	4	0.2674	0	0	4.1	0.2674	0	0	4.2	0.274478	0	0	3	0.274478	0	0	3.1	0.274478	0	0	3.2	0.274154	0	0	2	0.274154	0	0	2.1	0.274154	0	0	2.2	0.276235	0	0	1	0.276235	0	0	1.1	0.276235	0	0	1.2	0.275243
	0.268885	0	0	4	0.268885	0	0	4.1	0.268885	0	0	4.2	0.275964	0	0	3	0.275964	0	0	3.1	0.275964	0	0	3.2	0.275641	0	0	2	0.275641	0	0	2.1	0.275641	0	0	2.2	0.27772	0	0	1	0.27772	0	0	1.1	0.27772	0	0	1.2	0.276731
	0.27009	0	0	4	0.27009	0	0	4.1	0.27009	0	0	4.2	0.277991	0	0	3	0.277991	0	0	3.1	0.277991	0	0	3.2	0.277679	0	0	2	0.277679	0	0	2.1	0.277679	0	0	2.2	0.27976	0	0	1	0.27976	0	0	1.1	0.27976	0	0	1.2	0.278744
	0.274829	0	0	4	0.274829	0	0	4.1	0.274829	0	0	4.2	0.282729	0	0	3	0.282729	0	0	3.1	0.282729	0	0	3.2	0.282188	0	0	2	0.282188	0	0	2.1	0.282188	0	0	2.2	0.284269	0	0	1	0.284269	0	0	1.1	0.284269	0	0	1.2	0.283437
	0.276314	0	0	4	0.276314	0	0	4.1	0.276314	0	0	4.2	0.284214	0	0	3	0.284214	0	0	3.1	0.284214	0	0	3.2	0.283675	0	0	2	0.283675	0	0	2.1	0.283675	0	0	2.2	0.285754	0	0	1	0.285754	0	0	1.1	0.285754	0	0	1.2	0.284922
	0.277802	0	0	4	0.277802	0	0	4.1	0.277802	0	0	4.2	0.285699	0	0	3	0.285699	0	0	3.1	0.285699	0	0	3.2	0.28516	0	0	2	0.28516	0	0	2.1	0.28516	0	0	2.2	0.287239	0	0	1	0.287239	0	0	1.1	0.287239	0	0	1.2	0.286408
	0.279823	0	0	4	0.279823	0	0	4.1	0.279823	0	0	4.2	0.287716	0	0	3	0.287716	0	0	3.1	0.287716	0	0	3.2	0.286367	0	0	2	0.286367	0	0	2.1	0.286367	0	0	2.2	0.288444	0	0	1	0.288444	0	0	1.1	0.288444	0	0	1.2	0.288419
	0.284562	0	0	4	0.284562	0	0	4.1	0.284562	0	0	4.2	0.292456	0	0	3	0.292456	0	0	3.1	0.292456	0	0	3.2	0.290906	0	0	2	0.290906	0	0	2.1	0.290906	0	0	2.2	0.293183	0	0	1	0.293183	0	0	1.1	0.293183	0	0	1.2	0.293158
	0.286048	0	0	4	0.286048	0	0	4.1	0.286048	0	0	4.2	0.293943	0	0	3	0.293943	0	0	3.1	0.293943	0	0	3.2	0.292396	0	0	2	0.292396	0	0	2.1	0.292396	0	0	2.2	0.294668	0	0	1	0.294668	0	0	1.1	0.294668	0	0	1.2	0.294643
	0.287533	0	0	4	0.287533	0	0	4.1	0.287533	0	0	4.2	0.295428	0	0	3	0.295428	0	0	3.1	0.295428	0	0	3.2	0.293881	0	0	2	0.293881	0	0	2.1	0.293881	0	0	2.2	0.296154	0	0	1	0.296154	0	0	1.1	0.296154	0	0	1.2	0.296131
	0.289554	0	0	4	0.289554	0	0	4.1	0.289554	0	0	4.2	0.297452	0	0	3	0.297452	0	0	3.1	0.297452	0	0	3.2	0.295911	0	0	2	0.295911	0	0	2.1	0.295911	0	0	2.2	0.298196	0	0	1	0.298196	0	0	1.1	0.298196	0	0	1.2	0.29814
	0.294063	0	0	4	0.294063	0	0	4.1	0.294063	0	0	4.2	0.302189	0	0	3	0.302189	0	0	3.1	0.302189	0	0	3.2	0.30065	0	0	2	0.30065	0	0	2.1	0.30065	0	0	2.2	0.302933	0	0	1	0.302933	0	0	1.1	0.302933	0	0	1.2	0.30277
	0.295548	0	0	4	0.295548	0	0	4.1	0.295548	0	0	4.2	0.303677	0	0	3	0.303677	0	0	3.1	0.303677	0	0	3.2	0.302135	0	0	2	0.302135	0	0	2.1	0.302135	0	0	2.2	0.304418	0	0	1	0.304418	0	0	1.1	0.304418	0	0	1.2	0.304256
	0.297033	0	0	4	0.297033	0	0	4.1	0.297033	0	0	4.2	0.305162	0	0	3	0.305162	0	0	3.1	0.305162	0	0	3.2	0.303621	0	0	2	0.303621	0	0	2.1	0.303621	0	0	2.2	0.305903	0	0	1	0.305903	0	0	1.1	0.305903	0	0	1.2	0.305741
	0.299046	0	0	4	0.299046	0	0	4.1	0.299046	0	0	4.2	0.307177	0	0	3	0.307177	0	0	3.1	0.307177	0	0	3.2	0.305646	0	0	2	0.305646	0	0	2.1	0.305646	0	0	2.2	0.307939	0	0	1	0.307939	0	0	1.1	0.307939	0	0	1.2	0.307752
	0.30376	0	0	4	0.30376	0	0	4.1	0.30376	0	0	4.2	0.311685	0	0	3	0.311685	0	0	3.1	0.311685	0	0	3.2	0.310385	0	0	2	0.310385	0	0	2.1	0.310385	0	0	2.2	0.312679	0	0	1	0.312679	0	0	1.1	0.312679	0	0	1.2	0.312262
	0.305248	0	0	4	0.305248	0	0	4.1	0.305248	0	0	4.2	0.31317	0	0	3	0.31317	0	0	3.1	0.31317	0	0	3.2	0.311873	0	0	2	0.311873	0	0	2.1	0.311873	0	0	2.2	0.314164	0	0	1	0.314164	0	0	1.1	0.314164	0	0	1.2	0.313747
	0.306735	0	0	4	0.306735	0	0	4.1	0.306735	0	0	4.2	0.314656	0	0	3	0.314656	0	0	3.1	0.314656	0	0	3.2	0.313358	0	0	2	0.313358	0	0	2.1	0.313358	0	0	2.2	0.315649	0	0	1	0.315649	0	0	1.1	0.315649	0	0	1.2	0.315231
	0.308754	0	0	4	0.308754	0	0	4.1	0.308754	0	0	4.2	0.31586	0	0	3	0.31586	0	0	3.1	0.31586	0	0	3.2	0.315386	0	0	2	0.315386	0	0	2.1	0.315386	0	0	2.2	0.317685	0	0	1	0.317685	0	0	1.1	0.317685	0	0	1.2	0.316437
	0.313491	0	0	4	0.313491	0	0	4.1	0.313491	0	0	4.2	0.32037	0	0	3	0.32037	0	0	3.1	0.32037	0	0	3.2	0.319894	0	0	2	0.319894	0	0	2.1	0.319894	0	0	2.2	0.322194	0	0	1	0.322194	0	0	1.1	0.322194	0	0	1.2	0.320945
	0.314979	0	0	4	0.314979	0	0	4.1	0.314979	0	0	4.2	0.321858	0	0	3	0.321858	0	0	3.1	0.321858	0	0	3.2	0.321383	0	0	2	0.321383	0	0	2.1	0.321383	0	0	2.2	0.323681	0	0	1	0.323681	0	0	1.1	0.323681	0	0	1.2	0.322431
	0.316464	0	0	4	0.316464	0	0	4.1	0.316464	0	0	4.2	0.323343	0	0	3	0.323343	0	0	3.1	0.323343	0	0	3.2	0.322869	0	0	2	0.322869	0	0	2.1	0.322869	0	0	2.2	0.325166	0	0	1	0.325166	0	0	1.1	0.325166	0	0	1.2	0.323918
	0.318484	0	0	4	0.318484	0	0	4.1	0.318484	0	0	4.2	0.324548	0	0	3	0.324548	0	0	3.1	0.324548	0	0	3.2	0.324075	0	0	2	0.324075	0	0	2.1	0.324075	0	0	2.2	0.326373	0	0	1	0.326373	0	0	1.1	0.326373	0	0	1.2	0.325123
	0.322992	0	0	4	0.322992	0	0	4.1	0.322992	0	0	4.2	0.329056	0	0	3	0.329056	0	0	3.1	0.329056	0	0	3.2	0.328584	0	0	2	0.328584	0	0	2.1	0.328584	0	0	2.2	0.330881	0	0	1	0.330881	0	0	1.1	0.330881	0	0	1.2	0.329633
	0.324479	0	0	4	0.324479	0	0	4.1	0.324479	0	0	4.2	0.330541	0	0	3	0.330541	0	0	3.1	0.330541	0	0	3.2	0.330069	0	0	2	0.330069	0	0	2.1	0.330069	0	0	2.2	0.332366	0	0	1	0.332366	0	0	1.1	0.332366	0	0	1.2	0.331118
	0.325966	0	0	4	0.325966	0	0	4.1	0.325966	0	0	4.2	0.332026	0	0	3	0.332026	0	0	3.1	0.332026	0	0	3.2	0.331554	0	0	2	0.331554	0	0	2.1	0.331554	0	0	2.2	0.333851	0	0	1	0.333851	0	0	1.1	0.333851	0	0	1.2	0.332604
	0.327171	0	0	4	0.327171	0	0	4.1	0.327171	0	0	4.2	0.333233	0	0	3	0.333233	0	0	3.1	0.333233	0	0	3.2	0.332761	0	0	2	0.332761	0	0	2.1	0.332761	0	0	2.2	0.335056	0	0	1	0.335056	0	0	1.1	0.335056	0	0	1.2	0.333808
	0.331679	0	0	4	0.331679	0	0	4.1	0.331679	0	0	4.2	0.337741	0	0	3	0.337741	0	0	3.1	0.337741	0	0	3.2	0.337269	0	0	2	0.337269	0	0	2.1	0.337269	0	0	2.2	0.339566	0	0	1	0.339566	0	0	1.1	0.339566	0	0	1.2	0.338316
	0.333166	0	0	4	0.333166	0	0	4.1	0.333166	0	0	4.2	0.338997	0	0	3	0.338997	0	0	3.1	0.338997	0	0	3.2	0.338714	0	0	2	0.338714	0	0	2.1	0.338714	0	0	2.2	0.340962	0	0	1	0.340962	0	0	1.1	0.340962	0	0	1.2	0.33966
	0.33465	0	0	4	0.33465	0	0	4.1	0.33465	0	0	4.2	0.340485	0	0	3	0.340485	0	0	3.1	0.340485	0	0	3.2	0.340202	0	0	2	0.340202	0	0	2.1	0.340202	0	0	2.2	0.342452	0	0	1	0.342452	0	0	1.1	0.342452	0	0	1.2	0.340918
	0.335857	0	0	4	0.335857	0	0	4.1	0.335857	0	0	4.2	0.341689	0	0	3	0.341689	0	0	3.1	0.341689	0	0	3.2	0.341407	0	0	2	0.341407	0	0	2.1	0.341407	0	0	2.2	0.343656	0	0	1	0.343656	0	0	1.1	0.343656	0	0	1.2	0.342123
	0.340365	0	0	4	0.340365	0	0	4.1	0.340365	0	0	4.2	0.348064	0	0	3	0.348064	0	0	3.1	0.348064	0	0	3.2	0.348031	0	0	2	0.348031	0	0	2.1	0.348031	0	0	2.2	0.348167	0	0	1	0.348167	0	0	1.1	0.348167	0	0	1.2	0.348764
	0.341621	0	0	4	0.341621	0	0	4.1	0.341621	0	0	4.2	0.349549	0	0	3	0.349549	0	0	3.1	0.349549	0	0	3.2	0.349516	0	0	2	0.349516	0	0	2.1	0.349516	0	0	2.2	0.349666	0	0	1	0.349666	0	0	1.1	0.349666	0	0	1.2	0.350249
	0.34311	0	0	4	0.34311	0	0	4.1	0.34311	0	0	4.2	0.351033	0	0	3	0.351033	0	0	3.1	0.351033	0	0	3.2	0.351002	0	0	2	0.351002	0	0	2.1	0.351002	0	0	2.2	0.351151	0	0	1	0.351151	0	0	1.1	0.351151	0	0	1.2	0.351737
	0.344317	0	0	4	0.344317	0	0	4.1	0.344317	0	0	4.2	0.35224	0	0	3	0.35224	0	0	3.1	0.35224	0	0	3.2	0.352209	0	0	2	0.352209	0	0	2.1	0.352209	0	0	2.2	0.352356	0	0	1	0.352356	0	0	1.1	0.352356	0	0	1.2	0.352942
	0.348825	0	0	4	0.348825	0	0	4.1	0.348825	0	0	4.2	0.356748	0	0	3	0.356748	0	0	3.1	0.356748	0	0	3.2	0.356717	0	0	2	0.356717	0	0	2.1	0.356717	0	0	2.2	0.356867	0	0	1	0.356867	0	0	1.1	0.356867	0	0	1.2	0.357452
	0.35031	0	0	4	0.35031	0	0	4.1	0.35031	0	0	4.2	0.358233	0	0	3	0.358233	0	0	3.1	0.358233	0	0	3.2	0.358204	0	0	2	0.358204	0	0	2.1	0.358204	0	0	2.2	0.358352	0	0	1	0.358352	0	0	1.1	0.358352	0	0	1.2	0.358937
	0.3518	0	0	4	0.3518	0	0	4.1	0.3518	0	0	4.2	0.359718	0	0	3	0.359718	0	0	3.1	0.359718	0	0	3.2	0.359692	0	0	2	0.359692	0	0	2.1	0.359692	0	0	2.2	0.359837	0	0	1	0.359837	0	0	1.1	0.359837	0	0	1.2	0.360422
	0.353004	0	0	4	0.353004	0	0	4.1	0.353004	0	0	4.2	0.360923	0	0	3	0.360923	0	0	3.1	0.360923	0	0	3.2	0.360898	0	0	2	0.360898	0	0	2.1	0.360898	0	0	2.2	0.361042	0	0	1	0.361042	0	0	1.1	0.361042	0	0	1.2	0.361627
	0.357515	0	0	4	0.357515	0	0	4.1	0.357515	0	0	4.2	0.365433	0	0	3	0.365433	0	0	3.1	0.365433	0	0	3.2	0.365407	0	0	2	0.365407	0	0	2.1	0.365407	0	0	2.2	0.365552	0	0	1	0.365552	0	0	1.1	0.365552	0	0	1.2	0.366135
	0.359	0	0	4	0.359	0	0	4.1	0.359	0	0	4.2	0.366918	0	0	3	0.366918	0	0	3.1	0.366918	0	0	3.2	0.366894	0	0	2	0.366894	0	0	2.1	0.366894	0	0	2.2	0.367037	0	0	1	0.367037	0	0	1.1	0.367037	0	0	1.2	0.36762
	0.360485	0	0	4	0.360485	0	0	4.1	0.360485	0	0	4.2	0.368404	0	0	3	0.368404	0	0	3.1	0.368404	0	0	3.2	0.368383	0	0	2	0.368383	0	0	2.1	0.368383	0	0	2.2	0.368522	0	0	1	0.368522	0	0	1.1	0.368522	0	0	1.2	0.369106
	0.36169	0	0	4	0.36169	0	0	4.1	0.36169	0	0	4.2	0.369608	0	0	3	0.369608	0	0	3.1	0.369608	0	0	3.2	0.369588	0	0	2	0.369588	0	0	2.1	0.369588	0	0	2.2	0.369727	0	0	1	0.369727	0	0	1.1	0.369727	0	0	1.2	0.370313
	0.366198	0	0	4	0.366198	0	0	4.1	0.366198	0	0	4.2	0.374119	0	0	3	0.374119	0	0	3.1	0.374119	0	0	3.2	0.374096	0	0	2	0.374096	0	0	2.1	0.374096	0	0	2.2	0.374237	0	0	1	0.374237	0	0	1.1	0.374237	0	0	1.2	0.37482
	0.367683	0	0	4	0.367683	0	0	4.1	0.367683	0	0	4.2	0.375606	0	0	3	0.375606	0	0	3.1	0.375606	0	0	3.2	0.375583	0	0	2	0.375583	0	0	2.1	0.375583	0	0	2.2	0.375722	0	0	1	0.375722	0	0	1.1	0.375722	0	0	1.2	0.376308
	0.369173	0	0	4	0.369173	0	0	4.1	0.369173	0	0	4.2	0.377095	0	0	3	0.377095	0	0	3.1	0.377095	0	0	3.2	0.377085	0	0	2	0.377085	0	0	2.1	0.377085	0	0	2.2	0.377208	0	0	1	0.377208	0	0	1.1	0.377208	0	0	1.2	0.377793
	0.370377	0	0	4	0.370377	0	0	4.1	0.370377	0	0	4.2	0.3783	0	0	3	0.3783	0	0	3.1	0.3783	0	0	3.2	0.37829	0	0	2	0.37829	0	0	2.1	0.37829	0	0	2.2	0.379246	0	0	1	0.379246	0	0	1.1	0.379246	0	0	1.2	0.378998
	0.374886	0	0	4	0.374886	0	0	4.1	0.374886	0	0	4.2	0.382808	0	0	3	0.382808	0	0	3.1	0.382808	0	0	3.2	0.3828	0	0	2	0.3828	0	0	2.1	0.3828	0	0	2.2	0.383756	0	0	1	0.383756	0	0	1.1	0.383756	0	0	1.2	0.383506
	0.376371	0	0	4	0.376371	0	0	4.1	0.376371	0	0	4.2	0.384297	0	0	3	0.384297	0	0	3.1	0.384297	0	0	3.2	0.384285	0	0	2	0.384285	0	0	2.1	0.384285	0	0	2.2	0.385241	0	0	1	0.385241	0	0	1.1	0.385241	0	0	1.2	0.384993
	0.377858	0	0	4	0.377858	0	0	4.1	0.377858	0	0	4.2	0.385789	0	0	3	0.385789	0	0	3.1	0.385789	0	0	3.2	0.385771	0	0	2	0.385771	0	0	2.1	0.385771	0	0	2.2	0.386726	0	0	1	0.386726	0	0	1.1	0.386726	0	0	1.2	0.386493
	0.379063	0	0	4	0.379063	0	0	4.1	0.379063	0	0	4.2	0.387812	0	0	3	0.387812	0	0	3.1	0.387812	0	0	3.2	0.386975	0	0	2	0.386975	0	0	2.1	0.386975	0	0	2.2	0.387931	0	0	1	0.387931	0	0	1.1	0.387931	0	0	1.2	0.387698
	0.383573	0	0	4	0.383573	0	0	4.1	0.383573	0	0	4.2	0.392323	0	0	3	0.392323	0	0	3.1	0.392323	0	0	3.2	0.391483	0	0	2	0.391483	0	0	2.1	0.391483	0	0	2.2	0.392442	0	0	1	0.392442	0	0	1.1	0.392442	0	0	1.2	0.392208
	0.385058	0	0	4	0.385058	0	0	4.1	0.385058	0	0	4.2	0.393808	0	0	3	0.393808	0	0	3.1	0.393808	0	0	3.2	0.392971	0	0	2	0.392971	0	0	2.1	0.392971	0	0	2.2	0.393927	0	0	1	0.393927	0	0	1.1	0.393927	0	0	1.2	0.393693
	0.386543	0	0	4	0.386543	0	0	4.1	0.386543	0	0	4.2	0.395293	0	0	3	0.395293	0	0	3.1	0.395293	0	0	3.2	0.394456	0	0	2	0.394456	0	0	2.1	0.394456	0	0	2.2	0.39541	0	0	1	0.39541	0	0	1.1	0.39541	0	0	1.2	0.395179
	0.387748	0	0	4	0.387748	0	0	4.1	0.387748	0	0	4.2	0.3965	0	0	3	0.3965	0	0	3.1	0.3965	0	0	3.2	0.395661	0	0	2	0.395661	0	0	2.1	0.395661	0	0	2.2	0.397446	0	0	1	0.397446	0	0	1.1	0.397446	0	0	1.2	0.396383
	0.392257	0	0	4	0.392257	0	0	4.1	0.392257	0	0	4.2	0.401008	0	0	3	0.401008	0	0	3.1	0.401008	0	0	3.2	0.400169	0	0	2	0.400169	0	0	2.1	0.400169	0	0	2.2	0.401954	0	0	1	0.401954	0	0	1.1	0.401954	0	0	1.2	0.40112
	0.393746	0	0	4	0.393746	0	0	4.1	0.393746	0	0	4.2	0.402495	0	0	3	0.402495	0	0	3.1	0.402495	0	0	3.2	0.401656	0	0	2	0.401656	0	0	2.1	0.401656	0	0	2.2	0.403441	0	0	1	0.403441	0	0	1.1	0.403441	0	0	1.2	0.402608
	0.395231	0	0	4	0.395231	0	0	4.1	0.395231	0	0	4.2	0.403981	0	0	3	0.403981	0	0	3.1	0.403981	0	0	3.2	0.403141	0	0	2	0.403141	0	0	2.1	0.403141	0	0	2.2	0.404926	0	0	1	0.404926	0	0	1.1	0.404926	0	0	1.2	0.404095
	0.396436	0	0	4	0.396436	0	0	4.1	0.396436	0	0	4.2	0.405185	0	0	3	0.405185	0	0	3.1	0.405185	0	0	3.2	0.404346	0	0	2	0.404346	0	0	2.1	0.404346	0	0	2.2	0.406131	0	0	1	0.406131	0	0	1.1	0.406131	0	0	1.2	0.40611
	0.400946	0	0	4	0.400946	0	0	4.1	0.400946	0	0	4.2	0.409694	0	0	3	0.409694	0	0	3.1	0.409694	0	0	3.2	0.409087	0	0	2	0.409087	0	0	2.1	0.409087	0	0	2.2	0.410641	0	0	1	0.410641	0	0	1.1	0.410641	0	0	1.2	0.410827
	0.402446	0	0	4	0.402446	0	0	4.1	0.402446	0	0	4.2	0.411179	0	0	3	0.411179	0	0	3.1	0.411179	0	0	3.2	0.410573	0	0	2	0.410573	0	0	2.1	0.410573	0	0	2.2	0.412129	0	0	1	0.412129	0	0	1.1	0.412129	0	0	1.2	0.412312
	0.403931	0	0	4	0.403931	0	0	4.1	0.403931	0	0	4.2	0.412664	0	0	3	0.412664	0	0	3.1	0.412664	0	0	3.2	0.412062	0	0	2	0.412062	0	0	2.1	0.412062	0	0	2.2	0.413624	0	0	1	0.413624	0	0	1.1	0.413624	0	0	1.2	0.413801
	0.405138	0	0	4	0.405138	0	0	4.1	0.405138	0	0	4.2	0.414689	0	0	3	0.414689	0	0	3.1	0.414689	0	0	3.2	0.41409	0	0	2	0.41409	0	0	2.1	0.41409	0	0	2.2	0.414829	0	0	1	0.414829	0	0	1.1	0.414829	0	0	1.2	0.415806
	0.409646	0	0	4	0.409646	0	0	4.1	0.409646	0	0	4.2	0.419427	0	0	3	0.419427	0	0	3.1	0.419427	0	0	3.2	0.4186	0	0	2	0.4186	0	0	2.1	0.4186	0	0	2.2	0.419339	0	0	1	0.419339	0	0	1.1	0.419339	0	0	1.2	0.420314
	0.411131	0	0	4	0.411131	0	0	4.1	0.411131	0	0	4.2	0.420912	0	0	3	0.420912	0	0	3.1	0.420912	0	0	3.2	0.420085	0	0	2	0.420085	0	0	2.1	0.420085	0	0	2.2	0.420824	0	0	1	0.420824	0	0	1.1	0.420824	0	0	1.2	0.421804
	0.412619	0	0	4	0.412619	0	0	4.1	0.412619	0	0	4.2	0.422399	0	0	3	0.422399	0	0	3.1	0.422399	0	0	3.2	0.421571	0	0	2	0.421571	0	0	2.1	0.421571	0	0	2.2	0.422314	0	0	1	0.422314	0	0	1.1	0.422314	0	0	1.2	0.423289
	0.413823	0	0	4	0.413823	0	0	4.1	0.413823	0	0	4.2	0.424414	0	0	3	0.424414	0	0	3.1	0.424414	0	0	3.2	0.422775	0	0	2	0.422775	0	0	2.1	0.422775	0	0	2.2	0.424342	0	0	1	0.424342	0	0	1.1	0.424342	0	0	1.2	0.4253
	0.418332	0	0	4	0.418332	0	0	4.1	0.418332	0	0	4.2	0.431039	0	0	3	0.431039	0	0	3.1	0.431039	0	0	3.2	0.427512	0	0	2	0.427512	0	0	2.1	0.427512	0	0	2.2	0.430987	0	0	1	0.430987	0	0	1.1	0.430987	0	0	1.2	0.42981
	0.419816	0	0	4	0.419816	0	0	4.1	0.419816	0	0	4.2	0.432524	0	0	3	0.432524	0	0	3.1	0.432524	0	0	3.2	0.429	0	0	2	0.429	0	0	2.1	0.429	0	0	2.2	0.432472	0	0	1	0.432472	0	0	1.1	0.432472	0	0	1.2	0.431295
	0.421302	0	0	4	0.421302	0	0	4.1	0.421302	0	0	4.2	0.43401	0	0	3	0.43401	0	0	3.1	0.43401	0	0	3.2	0.430487	0	0	2	0.430487	0	0	2.1	0.430487	0	0	2.2	0.43396	0	0	1	0.43396	0	0	1.1	0.43396	0	0	1.2	0.432781
	0.422509	0	0	4	0.422509	0	0	4.1	0.422509	0	0	4.2	0.435215	0	0	3	0.435215	0	0	3.1	0.435215	0	0	3.2	0.432517	0	0	2	0.432517	0	0	2.1	0.432517	0	0	2.2	0.435165	0	0	1	0.435165	0	0	1.1	0.435165	0	0	1.2	0.434792
	0.427246	0	0	4	0.427246	0	0	4.1	0.427246	0	0	4.2	0.439954	0	0	3	0.439954	0	0	3.1	0.439954	0	0	3.2	0.437256	0	0	2	0.437256	0	0	2.1	0.437256	0	0	2.2	0.439902	0	0	1	0.439902	0	0	1.1	0.439902	0	0	1.2	0.439531
	0.428731	0	0	4	0.428731	0	0	4.1	0.428731	0	0	4.2	0.441439	0	0	3	0.441439	0	0	3.1	0.441439	0	0	3.2	0.438742	0	0	2	0.438742	0	0	2.1	0.438742	0	0	2.2	0.441387	0	0	1	0.441387	0	0	1.1	0.441387	0	0	1.2	0.441016
	0.430216	0	0	4	0.430216	0	0	4.1	0.430216	0	0	4.2	0.442924	0	0	3	0.442924	0	0	3.1	0.442924	0	0	3.2	0.440229	0	0	2	0.440229	0	0	2.1	0.440229	0	0	2.2	0.442872	0	0	1	0.442872	0	0	1.1	0.442872	0	0	1.2	0.44252
	0.432229	0	0	4	0.432229	0	0	4.1	0.432229	0	0	4.2	0.444948	0	0	3	0.444948	0	0	3.1	0.444948	0	0	3.2	0.442259	0	0	2	0.442259	0	0	2.1	0.442259	0	0	2.2	0.444906	0	0	1	0.444906	0	0	1.1	0.444906	0	0	1.2	0.444525
	0.436738	0	0	4	0.436738	0	0	4.1	0.436738	0	0	4.2	0.449689	0	0	3	0.449689	0	0	3.1	0.449689	0	0	3.2	0.446769	0	0	2	0.446769	0	0	2.1	0.446769	0	0	2.2	0.449645	0	0	1	0.449645	0	0	1.1	0.449645	0	0	1.2	0.449262
	0.438223	0	0	4	0.438223	0	0	4.1	0.438223	0	0	4.2	0.451176	0	0	3	0.451176	0	0	3.1	0.451176	0	0	3.2	0.448254	0	0	2	0.448254	0	0	2.1	0.448254	0	0	2.2	0.451133	0	0	1	0.451133	0	0	1.1	0.451133	0	0	1.2	0.450747
	0.43971	0	0	4	0.43971	0	0	4.1	0.43971	0	0	4.2	0.452664	0	0	3	0.452664	0	0	3.1	0.452664	0	0	3.2	0.449746	0	0	2	0.449746	0	0	2.1	0.449746	0	0	2.2	0.452618	0	0	1	0.452618	0	0	1.1	0.452618	0	0	1.2	0.452233
	0.440915	0	0	4	0.440915	0	0	4.1	0.440915	0	0	4.2	0.454679	0	0	3	0.454679	0	0	3.1	0.454679	0	0	3.2	0.45095	0	0	2	0.45095	0	0	2.1	0.45095	0	0	2.2	0.454644	0	0	1	0.454644	0	0	1.1	0.454644	0	0	1.2	0.45424
	0.445669	0	0	4	0.445669	0	0	4.1	0.445669	0	0	4.2	0.459221	0	0	3	0.459221	0	0	3.1	0.459221	0	0	3.2	0.455689	0	0	2	0.455689	0	0	2.1	0.455689	0	0	2.2	0.459152	0	0	1	0.459152	0	0	1.1	0.459152	0	0	1.2	0.458748
	0.447154	0	0	4	0.447154	0	0	4.1	0.447154	0	0	4.2	0.460706	0	0	3	0.460706	0	0	3.1	0.460706	0	0	3.2	0.457175	0	0	2	0.457175	0	0	2.1	0.457175	0	0	2.2	0.460639	0	0	1	0.460639	0	0	1.1	0.460639	0	0	1.2	0.460233
	0.448641	0	0	4	0.448641	0	0	4.1	0.448641	0	0	4.2	0.462191	0	0	3	0.462191	0	0	3.1	0.462191	0	0	3.2	0.458658	0	0	2	0.458658	0	0	2.1	0.458658	0	0	2.2	0.462126	0	0	1	0.462126	0	0	1.1	0.462126	0	0	1.2	0.461718
	0.450659	0	0	4	0.450659	0	0	4.1	0.450659	0	0	4.2	0.464206	0	0	3	0.464206	0	0	3.1	0.464206	0	0	3.2	0.46069	0	0	2	0.46069	0	0	2.1	0.46069	0	0	2.2	0.464154	0	0	1	0.464154	0	0	1.1	0.464154	0	0	1.2	0.462925
	0.455169	0	0	4	0.455169	0	0	4.1	0.455169	0	0	4.2	0.468945	0	0	3	0.468945	0	0	3.1	0.468945	0	0	3.2	0.465429	0	0	2	0.465429	0	0	2.1	0.465429	0	0	2.2	0.468891	0	0	1	0.468891	0	0	1.1	0.468891	0	0	1.2	0.467433
	0.456654	0	0	4	0.456654	0	0	4.1	0.456654	0	0	4.2	0.470435	0	0	3	0.470435	0	0	3.1	0.470435	0	0	3.2	0.466914	0	0	2	0.466914	0	0	2.1	0.466914	0	0	2.2	0.470376	0	0	1	0.470376	0	0	1.1	0.470376	0	0	1.2	0.468918
	0.458139	0	0	4	0.458139	0	0	4.1	0.458139	0	0	4.2	0.47192	0	0	3	0.47192	0	0	3.1	0.47192	0	0	3.2	0.468404	0	0	2	0.468404	0	0	2.1	0.468404	0	0	2.2	0.471862	0	0	1	0.471862	0	0	1.1	0.471862	0	0	1.2	0.470404
	0.460152	0	0	4	0.460152	0	0	4.1	0.460152	0	0	4.2	0.473935	0	0	3	0.473935	0	0	3.1	0.473935	0	0	3.2	0.470425	0	0	2	0.470425	0	0	2.1	0.470425	0	0	2.2	0.473887	0	0	1	0.473887	0	0	1.1	0.473887	0	0	1.2	0.471608
	0.464661	0	0	4	0.464661	0	0	4.1	0.464661	0	0	4.2	0.478446	0	0	3	0.478446	0	0	3.1	0.478446	0	0	3.2	0.474936	0	0	2	0.474936	0	0	2.1	0.474936	0	0	2.2	0.478396	0	0	1	0.478396	0	0	1.1	0.478396	0	0	1.2	0.476118
	0.466152	0	0	4	0.466152	0	0	4.1	0.466152	0	0	4.2	0.479933	0	0	3	0.479933	0	0	3.1	0.479933	0	0	3.2	0.476423	0	0	2	0.476423	0	0	2.1	0.476423	0	0	2.2	0.479883	0	0	1	0.479883	0	0	1.1	0.479883	0	0	1.2	0.477604
	0.467639	0	0	4	0.467639	0	0	4.1	0.467639	0	0	4.2	0.48142	0	0	3	0.48142	0	0	3.1	0.48142	0	0	3.2	0.477908	0	0	2	0.477908	0	0	2.1	0.477908	0	0	2.2	0.481368	0	0	1	0.481368	0	0	1.1	0.481368	0	0	1.2	0.479089
	0.468844	0	0	4	0.468844	0	0	4.1	0.468844	0	0	4.2	0.482625	0	0	3	0.482625	0	0	3.1	0.482625	0	0	3.2	0.479113	0	0	2	0.479113	0	0	2.1	0.479113	0	0	2.2	0.482573	0	0	1	0.482573	0	0	1.1	0.482573	0	0	1.2	0.480296
	0.473581	0	0	4	0.473581	0	0	4.1	0.473581	0	0	4.2	0.487133	0	0	3	0.487133	0	0	3.1	0.487133	0	0	3.2	0.483623	0	0	2	0.483623	0	0	2.1	0.483623	0	0	2.2	0.487083	0	0	1	0.487083	0	0	1.1	0.487083	0	0	1.2	0.484804
	0.475067	0	0	4	0.475067	0	0	4.1	0.475067	0	0	4.2	0.48862	0	0	3	0.48862	0	0	3.1	0.48862	0	0	3.2	0.485113	0	0	2	0.485113	0	0	2.1	0.485113	0	0	2.2	0.488568	0	0	1	0.488568	0	0	1.1	0.488568	0	0	1.2	0.486289
	0.476554	0	0	4	0.476554	0	0	4.1	0.476554	0	0	4.2	0.490106	0	0	3	0.490106	0	0	3.1	0.490106	0	0	3.2	0.486598	0	0	2	0.486598	0	0	2.1	0.486598	0	0	2.2	0.490054	0	0	1	0.490054	0	0	1.1	0.490054	0	0	1.2	0.487774
	0.478569	0	0	4	0.478569	0	0	4.1	0.478569	0	0	4.2	0.491312	0	0	3	0.491312	0	0	3.1	0.491312	0	0	3.2	0.487805	0	0	2	0.487805	0	0	2.1	0.487805	0	0	2.2	0.491258	0	0	1	0.491258	0	0	1.1	0.491258	0	0	1.2	0.488979
	0.483077	0	0	4	0.483077	0	0	4.1	0.483077	0	0	4.2	0.495821	0	0	3	0.495821	0	0	3.1	0.495821	0	0	3.2	0.492313	0	0	2	0.492313	0	0	2.1	0.492313	0	0	2.2	0.495766	0	0	1	0.495766	0	0	1.1	0.495766	0	0	1.2	0.493489
	0.484564	0	0	4	0.484564	0	0	4.1	0.484564	0	0	4.2	0.497077	0	0	3	0.497077	0	0	3.1	0.497077	0	0	3.2	0.4938	0	0	2	0.4938	0	0	2.1	0.4938	0	0	2.2	0.497254	0	0	1	0.497254	0	0	1.1	0.497254	0	0	1.2	0.494977
	0.48605	0	0	4	0.48605	0	0	4.1	0.48605	0	0	4.2	0.498564	0	0	3	0.498564	0	0	3.1	0.498564	0	0	3.2	0.495285	0	0	2	0.495285	0	0	2.1	0.495285	0	0	2.2	0.498739	0	0	1	0.498739	0	0	1.1	0.498739	0	0	1.2	0.496464
	0.487257	0	0	4	0.487257	0	0	4.1	0.487257	0	0	4.2	0.499769	0	0	3	0.499769	0	0	3.1	0.499769	0	0	3.2	0.49649	0	0	2	0.49649	0	0	2.1	0.49649	0	0	2.2	0.499944	0	0	1	0.499944	0	0	1.1	0.499944	0	0	1.2	0.497669
	0.491765	0	0	4	0.491765	0	0	4.1	0.491765	0	0	4.2	0.504279	0	0	3	0.504279	0	0	3.1	0.504279	0	0	3.2	0.501	0	0	2	0.501	0	0	2.1	0.501	0	0	2.2	0.504454	0	0	1	0.504454	0	0	1.1	0.504454	0	0	1.2	0.502179
	0.493252	0	0	4	0.493252	0	0	4.1	0.493252	0	0	4.2	0.505764	0	0	3	0.505764	0	0	3.1	0.505764	0	0	3.2	0.502485	0	0	2	0.502485	0	0	2.1	0.502485	0	0	2.2	0.505939	0	0	1	0.505939	0	0	1.1	0.505939	0	0	1.2	0.503439
	0.494737	0	0	4	0.494737	0	0	4.1	0.494737	0	0	4.2	0.507249	0	0	3	0.507249	0	0	3.1	0.507249	0	0	3.2	0.503971	0	0	2	0.503971	0	0	2.1	0.503971	0	0	2.2	0.507425	0	0	1	0.507425	0	0	1.1	0.507425	0	0	1.2	0.504925
	0.495942	0	0	4	0.495942	0	0	4.1	0.495942	0	0	4.2	0.508454	0	0	3	0.508454	0	0	3.1	0.508454	0	0	3.2	0.505175	0	0	2	0.505175	0	0	2.1	0.505175	0	0	2.2	0.508629	0	0	1	0.508629	0	0	1.1	0.508629	0	0	1.2	0.506131
	0.500452	0	0	4	0.500452	0	0	4.1	0.500452	0	0	4.2	0.512964	0	0	3	0.512964	0	0	3.1	0.512964	0	0	3.2	0.511796	0	0	2	0.511796	0	0	2.1	0.511796	0	0	2.2	0.513139	0	0	1	0.513139	0	0	1.1	0.513139	0	0	1.2	0.51277
	0.501708	0	0	4	0.501708	0	0	4.1	0.501708	0	0	4.2	0.514466	0	0	3	0.514466	0	0	3.1	0.514466	0	0	3.2	0.513281	0	0	2	0.513281	0	0	2.1	0.513281	0	0	2.2	0.514624	0	0	1	0.514624	0	0	1.1	0.514624	0	0	1.2	0.514258
	0.503194	0	0	4	0.503194	0	0	4.1	0.503194	0	0	4.2	0.515956	0	0	3	0.515956	0	0	3.1	0.515956	0	0	3.2	0.514767	0	0	2	0.514767	0	0	2.1	0.514767	0	0	2.2	0.516112	0	0	1	0.516112	0	0	1.1	0.516112	0	0	1.2	0.515745
	0.504398	0	0	4	0.504398	0	0	4.1	0.504398	0	0	4.2	0.51716	0	0	3	0.51716	0	0	3.1	0.51716	0	0	3.2	0.515973	0	0	2	0.515973	0	0	2.1	0.515973	0	0	2.2	0.517317	0	0	1	0.517317	0	0	1.1	0.517317	0	0	1.2	0.51695
	0.508908	0	0	4	0.508908	0	0	4.1	0.508908	0	0	4.2	0.521669	0	0	3	0.521669	0	0	3.1	0.521669	0	0	3.2	0.520482	0	0	2	0.520482	0	0	2.1	0.520482	0	0	2.2	0.521825	0	0	1	0.521825	0	0	1.1	0.521825	0	0	1.2	0.521458
	0.510394	0	0	4	0.510394	0	0	4.1	0.510394	0	0	4.2	0.523154	0	0	3	0.523154	0	0	3.1	0.523154	0	0	3.2	0.521967	0	0	2	0.521967	0	0	2.1	0.521967	0	0	2.2	0.523314	0	0	1	0.523314	0	0	1.1	0.523314	0	0	1.2	0.522943
	0.511879	0	0	4	0.511879	0	0	4.1	0.511879	0	0	4.2	0.524641	0	0	3	0.524641	0	0	3.1	0.524641	0	0	3.2	0.523452	0	0	2	0.523452	0	0	2.1	0.523452	0	0	2.2	0.524802	0	0	1	0.524802	0	0	1.1	0.524802	0	0	1.2	0.524429
	0.513084	0	0	4	0.513084	0	0	4.1	0.513084	0	0	4.2	0.525846	0	0	3	0.525846	0	0	3.1	0.525846	0	0	3.2	0.524657	0	0	2	0.524657	0	0	2.1	0.524657	0	0	2.2	0.526006	0	0	1	0.526006	0	0	1.1	0.526006	0	0	1.2	0.525635
	0.517592	0	0	4	0.517592	0	0	4.1	0.517592	0	0	4.2	0.530354	0	0	3	0.530354	0	0	3.1	0.530354	0	0	3.2	0.529167	0	0	2	0.529167	0	0	2.1	0.529167	0	0	2.2	0.530514	0	0	1	0.530514	0	0	1.1	0.530514	0	0	1.2	0.530144
	0.519079	0	0	4	0.519079	0	0	4.1	0.519079	0	0	4.2	0.531839	0	0	3	0.531839	0	0	3.1	0.531839	0	0	3.2	0.530652	0	0	2	0.530652	0	0	2.1	0.530652	0	0	2.2	0.532002	0	0	1	0.532002	0	0	1.1	0.532002	0	0	1.2	0.531629
	0.520562	0	0	4	0.520562	0	0	4.1	0.520562	0	0	4.2	0.533324	0	0	3	0.533324	0	0	3.1	0.533324	0	0	3.2	0.53214	0	0	2	0.53214	0	0	2.1	0.53214	0	0	2.2	0.533487	0	0	1	0.533487	0	0	1.1	0.533487	0	0	1.2	0.533114
	0.521769	0	0	4	0.521769	0	0	4.1	0.521769	0	0	4.2	0.534531	0	0	3	0.534531	0	0	3.1	0.534531	0	0	3.2	0.533344	0	0	2	0.533344	0	0	2.1	0.533344	0	0	2.2	0.534692	0	0	1	0.534692	0	0	1.1	0.534692	0	0	1.2	0.534319
	0.526277	0	0	4	0.526277	0	0	4.1	0.526277	0	0	4.2	0.539039	0	0	3	0.539039	0	0	3.1	0.539039	0	0	3.2	0.537855	0	0	2	0.537855	0	0	2.1	0.537855	0	0	2.2	0.539202	0	0	1	0.539202	0	0	1.1	0.539202	0	0	1.2	0.538829
	0.527769	0	0	4	0.527769	0	0	4.1	0.527769	0	0	4.2	0.540527	0	0	3	0.540527	0	0	3.1	0.540527	0	0	3.2	0.53934	0	0	2	0.53934	0	0	2.1	0.53934	0	0	2.2	0.540689	0	0	1	0.540689	0	0	1.1	0.540689	0	0	1.2	0.540316
	0.529256	0	0	4	0.529256	0	0	4.1	0.529256	0	0	4.2	0.54201	0	0	3	0.54201	0	0	3.1	0.54201	0	0	3.2	0.540825	0	0	2	0.540825	0	0	2.1	0.540825	0	0	2.2	0.542177	0	0	1	0.542177	0	0	1.1	0.542177	0	0	1.2	0.541802
	0.530461	0	0	4	0.530461	0	0	4.1	0.530461	0	0	4.2	0.543217	0	0	3	0.543217	0	0	3.1	0.543217	0	0	3.2	0.54203	0	0	2	0.54203	0	0	2.1	0.54203	0	0	2.2	0.543381	0	0	1	0.543381	0	0	1.1	0.543381	0	0	1.2	0.543006
	0.534969	0	0	4	0.534969	0	0	4.1	0.534969	0	0	4.2	0.547954	0	0	3	0.547954	0	0	3.1	0.547954	0	0	3.2	0.546538	0	0	2	0.546538	0	0	2.1	0.546538	0	0	2.2	0.547889	0	0	1	0.547889	0	0	1.1	0.547889	0	0	1.2	0.547515
	0.53646	0	0	4	0.53646	0	0	4.1	0.53646	0	0	4.2	0.549443	0	0	3	0.549443	0	0	3.1	0.549443	0	0	3.2	0.548023	0	0	2	0.548023	0	0	2.1	0.548023	0	0	2.2	0.549374	0	0	1	0.549374	0	0	1.1	0.549374	0	0	1.2	0.549002
	0.537948	0	0	4	0.537948	0	0	4.1	0.537948	0	0	4.2	0.550927	0	0	3	0.550927	0	0	3.1	0.550927	0	0	3.2	0.549508	0	0	2	0.549508	0	0	2.1	0.549508	0	0	2.2	0.55086	0	0	1	0.55086	0	0	1.1	0.55086	0	0	1.2	0.550495
	0.539152	0	0	4	0.539152	0	0	4.1	0.539152	0	0	4.2	0.552944	0	0	3	0.552944	0	0	3.1	0.552944	0	0	3.2	0.550715	0	0	2	0.550715	0	0	2.1	0.550715	0	0	2.2	0.552065	0	0	1	0.552065	0	0	1.1	0.552065	0	0	1.2	0.551702
	0.543661	0	0	4	0.543661	0	0	4.1	0.543661	0	0	4.2	0.557452	0	0	3	0.557452	0	0	3.1	0.557452	0	0	3.2	0.555223	0	0	2	0.555223	0	0	2.1	0.555223	0	0	2.2	0.556575	0	0	1	0.556575	0	0	1.1	0.556575	0	0	1.2	0.556211
	0.545158	0	0	4	0.545158	0	0	4.1	0.545158	0	0	4.2	0.558937	0	0	3	0.558937	0	0	3.1	0.558937	0	0	3.2	0.556713	0	0	2	0.556713	0	0	2.1	0.556713	0	0	2.2	0.55806	0	0	1	0.55806	0	0	1.1	0.55806	0	0	1.2	0.557697
	0.546644	0	0	4	0.546644	0	0	4.1	0.546644	0	0	4.2	0.560422	0	0	3	0.560422	0	0	3.1	0.560422	0	0	3.2	0.558198	0	0	2	0.558198	0	0	2.1	0.558198	0	0	2.2	0.559545	0	0	1	0.559545	0	0	1.1	0.559545	0	0	1.2	0.559185
	0.54785	0	0	4	0.54785	0	0	4.1	0.54785	0	0	4.2	0.561629	0	0	3	0.561629	0	0	3.1	0.561629	0	0	3.2	0.559403	0	0	2	0.559403	0	0	2.1	0.559403	0	0	2.2	0.56075	0	0	1	0.56075	0	0	1.1	0.56075	0	0	1.2	0.5612
	0.552358	0	0	4	0.552358	0	0	4.1	0.552358	0	0	4.2	0.566137	0	0	3	0.566137	0	0	3.1	0.566137	0	0	3.2	0.563913	0	0	2	0.563913	0	0	2.1	0.563913	0	0	2.2	0.565258	0	0	1	0.565258	0	0	1.1	0.565258	0	0	1.2	0.565708
	0.553846	0	0	4	0.553846	0	0	4.1	0.553846	0	0	4.2	0.567625	0	0	3	0.567625	0	0	3.1	0.567625	0	0	3.2	0.565398	0	0	2	0.565398	0	0	2.1	0.565398	0	0	2.2	0.566745	0	0	1	0.566745	0	0	1.1	0.566745	0	0	1.2	0.567195
	0.555331	0	0	4	0.555331	0	0	4.1	0.555331	0	0	4.2	0.569112	0	0	3	0.569112	0	0	3.1	0.569112	0	0	3.2	0.566885	0	0	2	0.566885	0	0	2.1	0.566885	0	0	2.2	0.568231	0	0	1	0.568231	0	0	1.1	0.568231	0	0	1.2	0.568683
	0.556536	0	0	4	0.556536	0	0	4.1	0.556536	0	0	4.2	0.570319	0	0	3	0.570319	0	0	3.1	0.570319	0	0	3.2	0.56809	0	0	2	0.56809	0	0	2.1	0.56809	0	0	2.2	0.569435	0	0	1	0.569435	0	0	1.1	0.569435	0	0	1.2	0.570681
	0.561044	0	0	4	0.561044	0	0	4.1	0.561044	0	0	4.2	0.575056	0	0	3	0.575056	0	0	3.1	0.575056	0	0	3.2	0.572598	0	0	2	0.572598	0	0	2.1	0.572598	0	0	2.2	0.573946	0	0	1	0.573946	0	0	1.1	0.573946	0	0	1.2	0.575191
	0.562529	0	0	4	0.562529	0	0	4.1	0.562529	0	0	4.2	0.576541	0	0	3	0.576541	0	0	3.1	0.576541	0	0	3.2	0.574085	0	0	2	0.574085	0	0	2.1	0.574085	0	0	2.2	0.575433	0	0	1	0.575433	0	0	1.1	0.575433	0	0	1.2	0.576677
	0.564014	0	0	4	0.564014	0	0	4.1	0.564014	0	0	4.2	0.578027	0	0	3	0.578027	0	0	3.1	0.578027	0	0	3.2	0.575573	0	0	2	0.575573	0	0	2.1	0.575573	0	0	2.2	0.576916	0	0	1	0.576916	0	0	1.1	0.576916	0	0	1.2	0.578164
	0.565219	0	0	4	0.565219	0	0	4.1	0.565219	0	0	4.2	0.580042	0	0	3	0.580042	0	0	3.1	0.580042	0	0	3.2	0.576778	0	0	2	0.576778	0	0	2.1	0.576778	0	0	2.2	0.578123	0	0	1	0.578123	0	0	1.1	0.578123	0	0	1.2	0.579369
	0.569729	0	0	4	0.569729	0	0	4.1	0.569729	0	0	4.2	0.584779	0	0	3	0.584779	0	0	3.1	0.584779	0	0	3.2	0.581288	0	0	2	0.581288	0	0	2.1	0.581288	0	0	2.2	0.582631	0	0	1	0.582631	0	0	1.1	0.582631	0	0	1.2	0.583877
	0.571217	0	0	4	0.571217	0	0	4.1	0.571217	0	0	4.2	0.586266	0	0	3	0.586266	0	0	3.1	0.586266	0	0	3.2	0.582773	0	0	2	0.582773	0	0	2.1	0.582773	0	0	2.2	0.584118	0	0	1	0.584118	0	0	1.1	0.584118	0	0	1.2	0.585362
	0.572702	0	0	4	0.572702	0	0	4.1	0.572702	0	0	4.2	0.587752	0	0	3	0.587752	0	0	3.1	0.587752	0	0	3.2	0.584258	0	0	2	0.584258	0	0	2.1	0.584258	0	0	2.2	0.585604	0	0	1	0.585604	0	0	1.1	0.585604	0	0	1.2	0.58685
	0.573907	0	0	4	0.573907	0	0	4.1	0.573907	0	0	4.2	0.589758	0	0	3	0.589758	0	0	3.1	0.589758	0	0	3.2	0.585463	0	0	2	0.585463	0	0	2.1	0.585463	0	0	2.2	0.586808	0	0	1	0.586808	0	0	1.1	0.586808	0	0	1.2	0.588054
	0.578646	0	0	4	0.578646	0	0	4.1	0.578646	0	0	4.2	0.596068	0	0	3	0.596068	0	0	3.1	0.596068	0	0	3.2	0.589971	0	0	2	0.589971	0	0	2.1	0.589971	0	0	2.2	0.591316	0	0	1	0.591316	0	0	1.1	0.591316	0	0	1.2	0.592791
	0.580133	0	0	4	0.580133	0	0	4.1	0.580133	0	0	4.2	0.597554	0	0	3	0.597554	0	0	3.1	0.597554	0	0	3.2	0.591458	0	0	2	0.591458	0	0	2.1	0.591458	0	0	2.2	0.592804	0	0	1	0.592804	0	0	1.1	0.592804	0	0	1.2	0.594279
	0.581619	0	0	4	0.581619	0	0	4.1	0.581619	0	0	4.2	0.599039	0	0	3	0.599039	0	0	3.1	0.599039	0	0	3.2	0.592944	0	0	2	0.592944	0	0	2.1	0.592944	0	0	2.2	0.594293	0	0	1	0.594293	0	0	1.1	0.594293	0	0	1.2	0.595764
	0.583636	0	0	4	0.583636	0	0	4.1	0.583636	0	0	4.2	0.600246	0	0	3	0.600246	0	0	3.1	0.600246	0	0	3.2	0.594971	0	0	2	0.594971	0	0	2.1	0.594971	0	0	2.2	0.595498	0	0	1	0.595498	0	0	1.1	0.595498	0	0	1.2	0.597773
	0.588146	0	0	4	0.588146	0	0	4.1	0.588146	0	0	4.2	0.604754	0	0	3	0.604754	0	0	3.1	0.604754	0	0	3.2	0.59948	0	0	2	0.59948	0	0	2.1	0.59948	0	0	2.2	0.60012	0	0	1	0.60012	0	0	1.1	0.60012	0	0	1.2	0.60251
	0.589631	0	0	4	0.589631	0	0	4.1	0.589631	0	0	4.2	0.606239	0	0	3	0.606239	0	0	3.1	0.606239	0	0	3.2	0.600967	0	0	2	0.600967	0	0	2.1	0.600967	0	0	2.2	0.601606	0	0	1	0.601606	0	0	1.1	0.601606	0	0	1.2	0.603995
	0.591123	0	0	4	0.591123	0	0	4.1	0.591123	0	0	4.2	0.607725	0	0	3	0.607725	0	0	3.1	0.607725	0	0	3.2	0.602452	0	0	2	0.602452	0	0	2.1	0.602452	0	0	2.2	0.603091	0	0	1	0.603091	0	0	1.1	0.603091	0	0	1.2	0.605483
	0.592327	0	0	4	0.592327	0	0	4.1	0.592327	0	0	4.2	0.608929	0	0	3	0.608929	0	0	3.1	0.608929	0	0	3.2	0.603657	0	0	2	0.603657	0	0	2.1	0.603657	0	0	2.2	0.604296	0	0	1	0.604296	0	0	1.1	0.604296	0	0	1.2	0.607494
	0.596836	0	0	4	0.596836	0	0	4.1	0.596836	0	0	4.2	0.613439	0	0	3	0.613439	0	0	3.1	0.613439	0	0	3.2	0.608167	0	0	2	0.608167	0	0	2.1	0.608167	0	0	2.2	0.609035	0	0	1	0.609035	0	0	1.1	0.609035	0	0	1.2	0.612231
	0.598323	0	0	4	0.598323	0	0	4.1	0.598323	0	0	4.2	0.614925	0	0	3	0.614925	0	0	3.1	0.614925	0	0	3.2	0.609658	0	0	2	0.609658	0	0	2.1	0.609658	0	0	2.2	0.610522	0	0	1	0.610522	0	0	1.1	0.610522	0	0	1.2	0.613716
	0.599821	0	0	4	0.599821	0	0	4.1	0.599821	0	0	4.2	0.616412	0	0	3	0.616412	0	0	3.1	0.616412	0	0	3.2	0.611144	0	0	2	0.611144	0	0	2.1	0.611144	0	0	2.2	0.61201	0	0	1	0.61201	0	0	1.1	0.61201	0	0	1.2	0.615202
	0.601025	0	0	4	0.601025	0	0	4.1	0.601025	0	0	4.2	0.617617	0	0	3	0.617617	0	0	3.1	0.617617	0	0	3.2	0.61235	0	0	2	0.61235	0	0	2.1	0.61235	0	0	2.2	0.614033	0	0	1	0.614033	0	0	1.1	0.614033	0	0	1.2	0.617204
	0.605764	0	0	4	0.605764	0	0	4.1	0.605764	0	0	4.2	0.622358	0	0	3	0.622358	0	0	3.1	0.622358	0	0	3.2	0.616859	0	0	2	0.616859	0	0	2.1	0.616859	0	0	2.2	0.618544	0	0	1	0.618544	0	0	1.1	0.618544	0	0	1.2	0.621715
	0.60725	0	0	4	0.60725	0	0	4.1	0.60725	0	0	4.2	0.623852	0	0	3	0.623852	0	0	3.1	0.623852	0	0	3.2	0.618344	0	0	2	0.618344	0	0	2.1	0.618344	0	0	2.2	0.620029	0	0	1	0.620029	0	0	1.1	0.620029	0	0	1.2	0.6232
	0.608737	0	0	4	0.608737	0	0	4.1	0.608737	0	0	4.2	0.625339	0	0	3	0.625339	0	0	3.1	0.625339	0	0	3.2	0.619829	0	0	2	0.619829	0	0	2.1	0.619829	0	0	2.2	0.621514	0	0	1	0.621514	0	0	1.1	0.621514	0	0	1.2	0.624685
	0.610753	0	0	4	0.610753	0	0	4.1	0.610753	0	0	4.2	0.627348	0	0	3	0.627348	0	0	3.1	0.627348	0	0	3.2	0.621857	0	0	2	0.621857	0	0	2.1	0.621857	0	0	2.2	0.622719	0	0	1	0.622719	0	0	1.1	0.622719	0	0	1.2	0.625892
	0.615261	0	0	4	0.615261	0	0	4.1	0.615261	0	0	4.2	0.631857	0	0	3	0.631857	0	0	3.1	0.631857	0	0	3.2	0.626367	0	0	2	0.626367	0	0	2.1	0.626367	0	0	2.2	0.627458	0	0	1	0.627458	0	0	1.1	0.627458	0	0	1.2	0.6304
	0.616746	0	0	4	0.616746	0	0	4.1	0.616746	0	0	4.2	0.633343	0	0	3	0.633343	0	0	3.1	0.633343	0	0	3.2	0.627852	0	0	2	0.627852	0	0	2.1	0.627852	0	0	2.2	0.628943	0	0	1	0.628943	0	0	1.1	0.628943	0	0	1.2	0.631887
	0.618231	0	0	4	0.618231	0	0	4.1	0.618231	0	0	4.2	0.634829	0	0	3	0.634829	0	0	3.1	0.634829	0	0	3.2	0.629337	0	0	2	0.629337	0	0	2.1	0.629337	0	0	2.2	0.630429	0	0	1	0.630429	0	0	1.1	0.630429	0	0	1.2	0.633374
	0.619436	0	0	4	0.619436	0	0	4.1	0.619436	0	0	4.2	0.636033	0	0	3	0.636033	0	0	3.1	0.636033	0	0	3.2	0.630542	0	0	2	0.630542	0	0	2.1	0.630542	0	0	2.2	0.632456	0	0	1	0.632456	0	0	1.1	0.632456	0	0	1.2	0.634579
	0.623946	0	0	4	0.623946	0	0	4.1	0.623946	0	0	4.2	0.640543	0	0	3	0.640543	0	0	3.1	0.640543	0	0	3.2	0.635052	0	0	2	0.635052	0	0	2.1	0.635052	0	0	2.2	0.636965	0	0	1	0.636965	0	0	1.1	0.636965	0	0	1.2	0.63909
	0.625433	0	0	4	0.625433	0	0	4.1	0.625433	0	0	4.2	0.642029	0	0	3	0.642029	0	0	3.1	0.642029	0	0	3.2	0.636537	0	0	2	0.636537	0	0	2.1	0.636537	0	0	2.2	0.638452	0	0	1	0.638452	0	0	1.1	0.638452	0	0	1.2	0.640575
	0.626921	0	0	4	0.626921	0	0	4.1	0.626921	0	0	4.2	0.643516	0	0	3	0.643516	0	0	3.1	0.643516	0	0	3.2	0.638023	0	0	2	0.638023	0	0	2.1	0.638023	0	0	2.2	0.639937	0	0	1	0.639937	0	0	1.1	0.639937	0	0	1.2	0.642058
	0.628125	0	0	4	0.628125	0	0	4.1	0.628125	0	0	4.2	0.644721	0	0	3	0.644721	0	0	3.1	0.644721	0	0	3.2	0.639228	0	0	2	0.639228	0	0	2.1	0.639228	0	0	2.2	0.641142	0	0	1	0.641142	0	0	1.1	0.641142	0	0	1.2	0.643265
	0.632827	0	0	4	0.632827	0	0	4.1	0.632827	0	0	4.2	0.649229	0	0	3	0.649229	0	0	3.1	0.649229	0	0	3.2	0.643738	0	0	2	0.643738	0	0	2.1	0.643738	0	0	2.2	0.64565	0	0	1	0.64565	0	0	1.1	0.64565	0	0	1.2	0.647773
	0.634312	0	0	4	0.634312	0	0	4.1	0.634312	0	0	4.2	0.650714	0	0	3	0.650714	0	0	3.1	0.650714	0	0	3.2	0.645225	0	0	2	0.645225	0	0	2.1	0.645225	0	0	2.2	0.647137	0	0	1	0.647137	0	0	1.1	0.647137	0	0	1.2	0.649258
	0.635819	0	0	4	0.635819	0	0	4.1	0.635819	0	0	4.2	0.6522	0	0	3	0.6522	0	0	3.1	0.6522	0	0	3.2	0.64671	0	0	2	0.64671	0	0	2.1	0.64671	0	0	2.2	0.648622	0	0	1	0.648622	0	0	1.1	0.648622	0	0	1.2	0.650745
	0.637838	0	0	4	0.637838	0	0	4.1	0.637838	0	0	4.2	0.653406	0	0	3	0.653406	0	0	3.1	0.653406	0	0	3.2	0.647917	0	0	2	0.647917	0	0	2.1	0.647917	0	0	2.2	0.649829	0	0	1	0.649829	0	0	1.1	0.649829	0	0	1.2	0.651952
	0.642348	0	0	4	0.642348	0	0	4.1	0.642348	0	0	4.2	0.657914	0	0	3	0.657914	0	0	3.1	0.657914	0	0	3.2	0.652425	0	0	2	0.652425	0	0	2.1	0.652425	0	0	2.2	0.654337	0	0	1	0.654337	0	0	1.1	0.654337	0	0	1.2	0.65646
	0.643835	0	0	4	0.643835	0	0	4.1	0.643835	0	0	4.2	0.65917	0	0	3	0.65917	0	0	3.1	0.65917	0	0	3.2	0.653912	0	0	2	0.653912	0	0	2.1	0.653912	0	0	2.2	0.655827	0	0	1	0.655827	0	0	1.1	0.655827	0	0	1.2	0.657945
	0.645321	0	0	4	0.645321	0	0	4.1	0.645321	0	0	4.2	0.660658	0	0	3	0.660658	0	0	3.1	0.660658	0	0	3.2	0.6554	4285.57	0.00184281	2.00184	0.6554	0	0	2.1	0.6554	0	0	2.2	0.657312	0	0	1	0.657312	0	0	1.1	0.657312	0	0	1.2	0.659433
	0.646525	0	0	4	0.646525	0	0	4.1	0.646525	0	0	4.2	0.661863	0	0	3	0.661863	0	0	3.1	0.661863	0	0	3.2	0.656605	0	0	2	0.656605	0	0	2.1	0.656605	0	0	2.2	0.658517	0	0	1	0.658517	0	0	1.1	0.658517	0	0	1.2	0.660638
	0.651036	0	0	4	0.651036	0	0	4.1	0.651036	0	0	4.2	0.666373	0	0	3	0.666373	0	0	3.1	0.666373	0	0	3.2	0.661113	0	0	2	0.661113	0	0	2.1	0.661113	0	0	2.2	0.663025	0	0	1	0.663025	0	0	1.1	0.663025	0	0	1.2	0.665146
	0.652521	0	0	4	0.652521	0	0	4.1	0.652521	0	0	4.2	0.667858	0	0	3	0.667858	0	0	3.1	0.667858	0	0	3.2	0.662598	0	0	2	0.662598	0	0	2.1	0.662598	0	0	2.2	0.664512	0	0	1	0.664512	0	0	1.1	0.664512	0	0	1.2	0.666633
	0.654008	0	0	4	0.654008	0	0	4.1	0.654008	0	0	4.2	0.669343	0	0	3	0.669343	0	0	3.1	0.669343	0	0	3.2	0.664085	0	0	2	0.664085	0	0	2.1	0.664085	0	0	2.2	0.665997	0	0	1	0.665997	0	0	1.1	0.665997	0	0	1.2	0.668118
	0.655213	0	0	4	0.655213	0	0	4.1	0.655213	0	0	4.2	0.670548	0	0	3	0.670548	0	0	3.1	0.670548	0	0	3.2	0.66529	0	0	2	0.66529	0	0	2.1	0.66529	0	0	2.2	0.667202	0	0	1	0.667202	0	0	1.1	0.667202	0	0	1.2	0.669323
	0.659721	0	0	4	0.659721	0	0	4.1	0.659721	0	0	4.2	0.675056	0	0	3	0.675056	0	0	3.1	0.675056	0	0	3.2	0.6698	0	0	2	0.6698	0	0	2.1	0.6698	0	0	2.2	0.671712	0	0	1	0.671712	0	0	1.1	0.671712	0	0	1.2	0.673833
	0.660977	0	0	4	0.660977	0	0	4.1	0.660977	0	0	4.2	0.676543	0	0	3	0.676543	0	0	3.1	0.676543	0	0	3.2	0.671285	0	0	2	0.671285	0	0	2.1	0.671285	0	0	2.2	0.673198	0	0	1	0.673198	0	0	1.1	0.673198	0	0	1.2	0.67532
	0.662481	0	0	4	0.662481	0	0	4.1	0.662481	0	0	4.2	0.678031	0	0	3	0.678031	0	0	3.1	0.678031	0	0	3.2	0.672771	0	0	2	0.672771	0	0	2.1	0.672771	0	0	2.2	0.674683	0	0	1	0.674683	0	0	1.1	0.674683	0	0	1.2	0.676808
	0.663686	0	0	4	0.663686	0	0	4.1	0.663686	0	0	4.2	0.679236	0	0	3	0.679236	0	0	3.1	0.679236	0	0	3.2	0.673976	0	0	2	0.673976	0	0	2.1	0.673976	0	0	2.2	0.675888	0	0	1	0.675888	0	0	1.1	0.675888	0	0	1.2	0.678013
	0.668194	0	0	4	0.668194	0	0	4.1	0.668194	0	0	4.2	0.683744	0	0	3	0.683744	0	0	3.1	0.683744	0	0	3.2	0.67859	0	0	2	0.67859	0	0	2.1	0.67859	0	0	2.2	0.680396	0	0	1	0.680396	0	0	1.1	0.680396	0	0	1.2	0.682627
	0.669679	0	0	4	0.669679	0	0	4.1	0.669679	0	0	4.2	0.685231	0	0	3	0.685231	0	0	3.1	0.685231	0	0	3.2	0.680075	0	0	2	0.680075	0	0	2.1	0.680075	0	0	2.2	0.681881	0	0	1	0.681881	0	0	1.1	0.681881	0	0	1.2	0.684112
	0.671164	0	0	4	0.671164	0	0	4.1	0.671164	0	0	4.2	0.686714	0	0	3	0.686714	0	0	3.1	0.686714	0	0	3.2	0.681563	0	0	2	0.681563	0	0	2.1	0.681563	0	0	2.2	0.683368	0	0	1	0.683368	0	0	1.1	0.683368	0	0	1.2	0.685597
	0.672371	0	0	4	0.672371	0	0	4.1	0.672371	0	0	4.2	0.687921	0	0	3	0.687921	0	0	3.1	0.687921	0	0	3.2	0.682767	0	0	2	0.682767	0	0	2.1	0.682767	0	0	2.2	0.684573	0	0	1	0.684573	0	0	1.1	0.684573	0	0	1.2	0.686804
	0.676996	0	0	4	0.676996	0	0	4.1	0.676996	0	0	4.2	0.692429	0	0	3	0.692429	0	0	3.1	0.692429	0	0	3.2	0.687275	0	0	2	0.687275	0	0	2.1	0.687275	0	0	2.2	0.689081	0	0	1	0.689081	0	0	1.1	0.689081	0	0	1.2	0.691312
	0.6785	0	0	4	0.6785	0	0	4.1	0.6785	0	0	4.2	0.693914	0	0	3	0.693914	0	0	3.1	0.693914	0	0	3.2	0.688763	0	0	2	0.688763	0	0	2.1	0.688763	0	0	2.2	0.690568	0	0	1	0.690568	0	0	1.1	0.690568	0	0	1.2	0.692798
	0.679985	0	0	4	0.679985	0	0	4.1	0.679985	0	0	4.2	0.6954	0	0	3	0.6954	0	0	3.1	0.6954	0	0	3.2	0.69025	0	0	2	0.69025	0	0	2.1	0.69025	0	0	2.2	0.692052	0	0	1	0.692052	0	0	1.1	0.692052	0	0	1.2	0.694285
	0.681192	0	0	4	0.681192	0	0	4.1	0.681192	0	0	4.2	0.696604	0	0	3	0.696604	0	0	3.1	0.696604	0	0	3.2	0.691455	0	0	2	0.691455	0	0	2.1	0.691455	0	0	2.2	0.693258	0	0	1	0.693258	0	0	1.1	0.693258	0	0	1.2	0.69549
	0.6857	0	0	4	0.6857	0	0	4.1	0.6857	0	0	4.2	0.701114	0	0	3	0.701114	0	0	3.1	0.701114	0	0	3.2	0.695965	0	0	2	0.695965	0	0	2.1	0.695965	0	0	2.2	0.697766	0	0	1	0.697766	0	0	1.1	0.697766	0	0	1.2	0.699998
	0.687185	0	0	4	0.687185	0	0	4.1	0.687185	0	0	4.2	0.702602	0	0	3	0.702602	0	0	3.1	0.702602	0	0	3.2	0.69745	0	0	2	0.69745	0	0	2.1	0.69745	0	0	2.2	0.699252	0	0	1	0.699252	0	0	1.1	0.699252	0	0	1.2	0.701485
	0.688671	0	0	4	0.688671	0	0	4.1	0.688671	0	0	4.2	0.704087	0	0	3	0.704087	0	0	3.1	0.704087	0	0	3.2	0.698935	0	0	2	0.698935	0	0	2.1	0.698935	0	0	2.2	0.700739	0	0	1	0.700739	0	0	1.1	0.700739	0	0	1.2	0.70297
	0.689875	0	0	4	0.689875	0	0	4.1	0.689875	0	0	4.2	0.705294	0	0	3	0.705294	0	0	3.1	0.705294	0	0	3.2	0.70014	0	0	2	0.70014	0	0	2.1	0.70014	0	0	2.2	0.701944	0	0	1	0.701944	0	0	1.1	0.701944	0	0	1.2	0.704175
	0.694386	0	0	4	0.694386	0	0	4.1	0.694386	0	0	4.2	0.709802	0	0	3	0.709802	0	0	3.1	0.709802	0	0	3.2	0.70465	0	0	2	0.70465	0	0	2.1	0.70465	0	0	2.2	0.706454	0	0	1	0.706454	0	0	1.1	0.706454	0	0	1.2	0.708683
	0.695871	0	0	4	0.695871	0	0	4.1	0.695871	0	0	4.2	0.711289	0	0	3	0.711289	0	0	3.1	0.711289	0	0	3.2	0.706135	0	0	2	0.706135	0	0	2.1	0.706135	0	0	2.2	0.707939	0	0	1	0.707939	0	0	1.1	0.707939	0	0	1.2	0.71017
	0.697358	0	0	4	0.697358	0	0	4.1	0.697358	0	0	4.2	0.712775	0	0	3	0.712775	0	0	3.1	0.712775	0	0	3.2	0.707621	0	0	2	0.707621	0	0	2.1	0.707621	0	0	2.2	0.709425	0	0	1	0.709425	0	0	1.1	0.709425	0	0	1.2	0.711656
	0.698563	0	0	4	0.698563	0	0	4.1	0.698563	0	0	4.2	0.713979	0	0	3	0.713979	0	0	3.1	0.713979	0	0	3.2	0.708825	0	0	2	0.708825	0	0	2.1	0.708825	0	0	2.2	0.710629	0	0	1	0.710629	0	0	1.1	0.710629	0	0	1.2	0.71286
	0.703073	0	0	4	0.703073	0	0	4.1	0.703073	0	0	4.2	0.71849	0	0	3	0.71849	0	0	3.1	0.71849	0	0	3.2	0.713334	0	0	2	0.713334	0	0	2.1	0.713334	0	0	2.2	0.715139	0	0	1	0.715139	0	0	1.1	0.715139	0	0	1.2	0.717371
	0.704558	0	0	4	0.704558	0	0	4.1	0.704558	0	0	4.2	0.719975	0	0	3	0.719975	0	0	3.1	0.719975	0	0	3.2	0.714821	0	0	2	0.714821	0	0	2.1	0.714821	0	0	2.2	0.716625	0	0	1	0.716625	0	0	1.1	0.716625	0	0	1.2	0.718856
	0.706042	0	0	4	0.706042	0	0	4.1	0.706042	0	0	4.2	0.721462	0	0	3	0.721462	0	0	3.1	0.721462	0	0	3.2	0.716306	0	0	2	0.716306	0	0	2.1	0.716306	0	0	2.2	0.71811	0	0	1	0.71811	0	0	1.1	0.71811	0	0	1.2	0.720343
	0.707248	0	0	4	0.707248	0	0	4.1	0.707248	0	0	4.2	0.722667	0	0	3	0.722667	0	0	3.1	0.722667	0	0	3.2	0.717511	0	0	2	0.717511	0	0	2.1	0.717511	0	0	2.2	0.720138	0	0	1	0.720138	0	0	1.1	0.720138	0	0	1.2	0.721548
	0.711757	0	0	4	0.711757	0	0	4.1	0.711757	0	0	4.2	0.727177	0	0	3	0.727177	0	0	3.1	0.727177	0	0	3.2	0.722021	0	0	2	0.722021	0	0	2.1	0.722021	0	0	2.2	0.724648	0	0	1	0.724648	0	0	1.1	0.724648	0	0	1.2	0.726056
	0.713242	0	0	4	0.713242	0	0	4.1	0.713242	0	0	4.2	0.728664	0	0	3	0.728664	0	0	3.1	0.728664	0	0	3.2	0.723506	0	0	2	0.723506	0	0	2.1	0.723506	0	0	2.2	0.726135	0	0	1	0.726135	0	0	1.1	0.726135	0	0	1.2	0.727543
	0.714727	0	0	4	0.714727	0	0	4.1	0.714727	0	0	4.2	0.730152	0	0	3	0.730152	0	0	3.1	0.730152	0	0	3.2	0.724992	0	0	2	0.724992	0	0	2.1	0.724992	0	0	2.2	0.72762	0	0	1	0.72762	0	0	1.1	0.72762	0	0	1.2	0.729031
	0.715934	0	0	4	0.715934	0	0	4.1	0.715934	0	0	4.2	0.731356	0	0	3	0.731356	0	0	3.1	0.731356	0	0	3.2	0.727013	0	0	2	0.727013	0	0	2.1	0.727013	0	0	2.2	0.728825	0	0	1	0.728825	0	0	1.1	0.728825	0	0	1.2	0.730235
	0.720442	0	0	4	0.720442	0	0	4.1	0.720442	0	0	4.2	0.735865	0	0	3	0.735865	0	0	3.1	0.735865	0	0	3.2	0.731521	0	0	2	0.731521	0	0	2.1	0.731521	0	0	2.2	0.733335	0	0	1	0.733335	0	0	1.1	0.733335	0	0	1.2	0.734746
	0.721927	0	0	4	0.721927	0	0	4.1	0.721927	0	0	4.2	0.73735	0	0	3	0.73735	0	0	3.1	0.73735	0	0	3.2	0.733006	0	0	2	0.733006	0	0	2.1	0.733006	0	0	2.2	0.734823	0	0	1	0.734823	0	0	1.1	0.734823	0	0	1.2	0.736231
	0.723412	0	0	4	0.723412	0	0	4.1	0.723412	0	0	4.2	0.738835	0	0	3	0.738835	0	0	3.1	0.738835	0	0	3.2	0.734492	0	0	2	0.734492	0	0	2.1	0.734492	0	0	2.2	0.736318	0	0	1	0.736318	0	0	1.1	0.736318	0	0	1.2	0.737716
	0.724617	0	0	4	0.724617	0	0	4.1	0.724617	0	0	4.2	0.740846	0	0	3	0.740846	0	0	3.1	0.740846	0	0	3.2	0.735696	0	0	2	0.735696	0	0	2.1	0.735696	0	0	2.2	0.737525	0	0	1	0.737525	0	0	1.1	0.737525	0	0	1.2	0.738921
	0.729127	0	0	4	0.729127	0	0	4.1	0.729127	0	0	4.2	0.745356	0	0	3	0.745356	0	0	3.1	0.745356	0	0	3.2	0.740207	0	0	2	0.740207	0	0	2.1	0.740207	0	0	2.2	0.742033	0	0	1	0.742033	0	0	1.1	0.742033	0	0	1.2	0.743431
	0.730612	0	0	4	0.730612	0	0	4.1	0.730612	0	0	4.2	0.746841	0	0	3	0.746841	0	0	3.1	0.746841	0	0	3.2	0.741692	0	0	2	0.741692	0	0	2.1	0.741692	0	0	2.2	0.743518	0	0	1	0.743518	0	0	1.1	0.743518	0	0	1.2	0.744916
	0.732098	0	0	4	0.732098	0	0	4.1	0.732098	0	0	4.2	0.748329	0	0	3	0.748329	0	0	3.1	0.748329	0	0	3.2	0.743177	0	0	2	0.743177	0	0	2.1	0.743177	0	0	2.2	0.74501	0	0	1	0.74501	0	0	1.1	0.74501	0	0	1.2	0.746402
	0.733303	0	0	4	0.733303	0	0	4.1	0.733303	0	0	4.2	0.749536	0	0	3	0.749536	0	0	3.1	0.749536	0	0	3.2	0.744382	0	0	2	0.744382	0	0	2.1	0.744382	0	0	2.2	0.746215	0	0	1	0.746215	0	0	1.1	0.746215	0	0	1.2	0.747606
	0.737813	0	0	4	0.737813	0	0	4.1	0.737813	0	0	4.2	0.754048	0	0	3	0.754048	0	0	3.1	0.754048	0	0	3.2	0.748892	0	0	2	0.748892	0	0	2.1	0.748892	0	0	2.2	0.750723	0	0	1	0.750723	0	0	1.1	0.750723	0	0	1.2	0.752345
	0.739298	0	0	4	0.739298	0	0	4.1	0.739298	0	0	4.2	0.755535	0	0	3	0.755535	0	0	3.1	0.755535	0	0	3.2	0.750379	0	0	2	0.750379	0	0	2.1	0.750379	0	0	2.2	0.752208	0	0	1	0.752208	0	0	1.1	0.752208	0	0	1.2	0.753837
	0.740785	0	0	4	0.740785	0	0	4.1	0.740785	0	0	4.2	0.75702	0	0	3	0.75702	0	0	3.1	0.75702	0	0	3.2	0.751865	0	0	2	0.751865	0	0	2.1	0.751865	0	0	2.2	0.753695	0	0	1	0.753695	0	0	1.1	0.753695	0	0	1.2	0.75532
	0.74199	0	0	4	0.74199	0	0	4.1	0.74199	0	0	4.2	0.759033	0	0	3	0.759033	0	0	3.1	0.759033	0	0	3.2	0.753882	0	0	2	0.753882	0	0	2.1	0.753882	0	0	2.2	0.7549	0	0	1	0.7549	0	0	1.1	0.7549	0	0	1.2	0.757331
	0.746498	0	0	4	0.746498	0	0	4.1	0.746498	0	0	4.2	0.763648	0	0	3	0.763648	0	0	3.1	0.763648	0	0	3.2	0.75839	0	0	2	0.75839	0	0	2.1	0.75839	0	0	2.2	0.759518	0	0	1	0.759518	0	0	1.1	0.759518	0	0	1.2	0.762071
	0.747985	0	0	4	0.747985	0	0	4.1	0.747985	0	0	4.2	0.765143	0	0	3	0.765143	0	0	3.1	0.765143	0	0	3.2	0.759877	0	0	2	0.759877	0	0	2.1	0.759877	0	0	2.2	0.76101	0	0	1	0.76101	0	0	1.1	0.76101	0	0	1.2	0.763556
	0.749471	0	0	4	0.749471	0	0	4.1	0.749471	0	0	4.2	0.766631	0	0	3	0.766631	0	0	3.1	0.766631	0	0	3.2	0.761362	0	0	2	0.761362	0	0	2.1	0.761362	0	0	2.2	0.762495	0	0	1	0.762495	0	0	1.1	0.762495	0	0	1.2	0.765041
	0.750678	0	0	4	0.750678	0	0	4.1	0.750678	0	0	4.2	0.767838	0	0	3	0.767838	0	0	3.1	0.767838	0	0	3.2	0.762569	0	0	2	0.762569	0	0	2.1	0.762569	0	0	2.2	0.7637	0	0	1	0.7637	0	0	1.1	0.7637	0	0	1.2	0.767044
	0.755186	0	0	4	0.755186	0	0	4.1	0.755186	0	0	4.2	0.772346	0	0	3	0.772346	0	0	3.1	0.772346	0	0	3.2	0.767077	0	0	2	0.767077	0	0	2.1	0.767077	0	0	2.2	0.768439	0	0	1	0.768439	0	0	1.1	0.768439	0	0	1.2	0.771552
	0.756671	0	0	4	0.756671	0	0	4.1	0.756671	0	0	4.2	0.773835	0	0	3	0.773835	0	0	3.1	0.773835	0	0	3.2	0.768565	0	0	2	0.768565	0	0	2.1	0.768565	0	0	2.2	0.769925	0	0	1	0.769925	0	0	1.1	0.769925	0	0	1.2	0.773039
	0.758156	0	0	4	0.758156	0	0	4.1	0.758156	0	0	4.2	0.775322	0	0	3	0.775322	0	0	3.1	0.775322	0	0	3.2	0.77005	0	0	2	0.77005	0	0	2.1	0.77005	0	0	2.2	0.77141	0	0	1	0.77141	0	0	1.1	0.77141	0	0	1.2	0.774543
	0.759363	0	0	4	0.759363	0	0	4.1	0.759363	0	0	4.2	0.776527	0	0	3	0.776527	0	0	3.1	0.776527	0	0	3.2	0.771255	0	0	2	0.771255	0	0	2.1	0.771255	0	0	2.2	0.77344	0	0	1	0.77344	0	0	1.1	0.77344	0	0	1.2	0.775748
	0.763871	0	0	4	0.763871	0	0	4.1	0.763871	0	0	4.2	0.781038	0	0	3	0.781038	0	0	3.1	0.781038	0	0	3.2	0.775765	0	0	2	0.775765	0	0	2.1	0.775765	0	0	2.2	0.777948	0	0	1	0.777948	0	0	1.1	0.777948	0	0	1.2	0.780257
	0.76536	0	0	4	0.76536	0	0	4.1	0.76536	0	0	4.2	0.782523	0	0	3	0.782523	0	0	3.1	0.782523	0	0	3.2	0.777252	0	0	2	0.777252	0	0	2.1	0.777252	0	0	2.2	0.779435	0	0	1	0.779435	0	0	1.1	0.779435	0	0	1.2	0.781743
	0.766619	0	0	4	0.766619	0	0	4.1	0.766619	0	0	4.2	0.784008	0	0	3	0.784008	0	0	3.1	0.784008	0	0	3.2	0.77874	0	0	2	0.77874	0	0	2.1	0.77874	0	0	2.2	0.780918	0	0	1	0.780918	0	0	1.1	0.780918	0	0	1.2	0.783229
	0.768625	0	0	4	0.768625	0	0	4.1	0.768625	0	0	4.2	0.785215	0	0	3	0.785215	0	0	3.1	0.785215	0	0	3.2	0.779944	0	0	2	0.779944	0	0	2.1	0.779944	0	0	2.2	0.782125	0	0	1	0.782125	0	0	1.1	0.782125	0	0	1.2	0.784433
	0.773136	0	0	4	0.773136	0	0	4.1	0.773136	0	0	4.2	0.789723	0	0	3	0.789723	0	0	3.1	0.789723	0	0	3.2	0.784452	0	0	2	0.784452	0	0	2.1	0.784452	0	0	2.2	0.786719	0	0	1	0.786719	0	0	1.1	0.786719	0	0	1.2	0.788942
	0.774623	0	0	4	0.774623	0	0	4.1	0.774623	0	0	4.2	0.79121	0	0	3	0.79121	0	0	3.1	0.79121	0	0	3.2	0.78594	0	0	2	0.78594	0	0	2.1	0.78594	0	0	2.2	0.788204	0	0	1	0.788204	0	0	1.1	0.788204	0	0	1.2	0.790429
	0.776108	0	0	4	0.776108	0	0	4.1	0.776108	0	0	4.2	0.792695	0	0	3	0.792695	0	0	3.1	0.792695	0	0	3.2	0.787427	0	0	2	0.787427	0	0	2.1	0.787427	0	0	2.2	0.789704	0	0	1	0.789704	0	0	1.1	0.789704	0	0	1.2	0.791914
	0.777313	0	0	4	0.777313	0	0	4.1	0.777313	0	0	4.2	0.7939	0	0	3	0.7939	0	0	3.1	0.7939	0	0	3.2	0.788632	0	0	2	0.788632	0	0	2.1	0.788632	0	0	2.2	0.791727	0	0	1	0.791727	0	0	1.1	0.791727	0	0	1.2	0.793119
	0.781821	0	0	4	0.781821	0	0	4.1	0.781821	0	0	4.2	0.798408	0	0	3	0.798408	0	0	3.1	0.798408	0	0	3.2	0.793142	0	0	2	0.793142	0	0	2.1	0.793142	0	0	2.2	0.796238	0	0	1	0.796238	0	0	1.1	0.796238	0	0	1.2	0.797629
	0.783308	0	0	4	0.783308	0	0	4.1	0.783308	0	0	4.2	0.799893	0	0	3	0.799893	0	0	3.1	0.799893	0	0	3.2	0.794629	0	0	2	0.794629	0	0	2.1	0.794629	0	0	2.2	0.797723	0	0	1	0.797723	0	0	1.1	0.797723	0	0	1.2	0.799114
	0.784796	0	0	4	0.784796	0	0	4.1	0.784796	0	0	4.2	0.801379	0	0	3	0.801379	0	0	3.1	0.801379	0	0	3.2	0.796115	0	0	2	0.796115	0	0	2.1	0.796115	0	0	2.2	0.799208	0	0	1	0.799208	0	0	1.1	0.799208	0	0	1.2	0.8006
	0.786	0	0	4	0.786	0	0	4.1	0.786	0	0	4.2	0.802583	0	0	3	0.802583	0	0	3.1	0.802583	0	0	3.2	0.797319	0	0	2	0.797319	0	0	2.1	0.797319	0	0	2.2	0.800415	0	0	1	0.800415	0	0	1.1	0.800415	0	0	1.2	0.801804
	0.79074	0	0	4	0.79074	0	0	4.1	0.79074	0	0	4.2	0.807094	0	0	3	0.807094	0	0	3.1	0.807094	0	0	3.2	0.80183	0	0	2	0.80183	0	0	2.1	0.80183	0	0	2.2	0.804923	0	0	1	0.804923	0	0	1.1	0.804923	0	0	1.2	0.806313
	0.792225	0	0	4	0.792225	0	0	4.1	0.792225	0	0	4.2	0.808579	0	0	3	0.808579	0	0	3.1	0.808579	0	0	3.2	0.803315	0	0	2	0.803315	0	0	2.1	0.803315	0	0	2.2	0.806408	0	0	1	0.806408	0	0	1.1	0.806408	0	0	1.2	0.807798
	0.793712	0	0	4	0.793712	0	0	4.1	0.793712	0	0	4.2	0.810064	0	0	3	0.810064	0	0	3.1	0.810064	0	0	3.2	0.8048	0	0	2	0.8048	0	0	2.1	0.8048	0	0	2.2	0.807893	0	0	1	0.807893	0	0	1.1	0.807893	0	0	1.2	0.809283
	0.795713	0	0	4	0.795713	0	0	4.1	0.795713	0	0	4.2	0.811271	0	0	3	0.811271	0	0	3.1	0.811271	0	0	3.2	0.806005	0	0	2	0.806005	0	0	2.1	0.806005	0	0	2.2	0.809098	0	0	1	0.809098	0	0	1.1	0.809098	0	0	1.2	0.81049
	0.800223	0	0	4	0.800223	0	0	4.1	0.800223	0	0	4.2	0.815779	0	0	3	0.815779	0	0	3.1	0.815779	0	0	3.2	0.810513	0	0	2	0.810513	0	0	2.1	0.810513	0	0	2.2	0.813608	0	0	1	0.813608	0	0	1.1	0.813608	0	0	1.2	0.814998
	0.801708	0	0	4	0.801708	0	0	4.1	0.801708	0	0	4.2	0.817035	0	0	3	0.817035	0	0	3.1	0.817035	0	0	3.2	0.812	0	0	2	0.812	0	0	2.1	0.812	0	0	2.2	0.815093	0	0	1	0.815093	0	0	1.1	0.815093	0	0	1.2	0.816483
	0.803194	0	0	4	0.803194	0	0	4.1	0.803194	0	0	4.2	0.818527	0	0	3	0.818527	0	0	3.1	0.818527	0	0	3.2	0.813485	0	0	2	0.813485	0	0	2.1	0.813485	0	0	2.2	0.816579	0	0	1	0.816579	0	0	1.1	0.816579	0	0	1.2	0.817968
	0.8044	0	0	4	0.8044	0	0	4.1	0.8044	0	0	4.2	0.819734	0	0	3	0.819734	0	0	3.1	0.819734	0	0	3.2	0.814692	0	0	2	0.814692	0	0	2.1	0.814692	0	0	2.2	0.817786	0	0	1	0.817786	0	0	1.1	0.817786	0	0	1.2	0.819173
	0.808909	0	0	4	0.808909	0	0	4.1	0.808909	0	0	4.2	0.824242	0	0	3	0.824242	0	0	3.1	0.824242	0	0	3.2	0.819201	0	0	2	0.819201	0	0	2.1	0.819201	0	0	2.2	0.822294	0	0	1	0.822294	0	0	1.1	0.822294	0	0	1.2	0.823683
	0.810396	0	0	4	0.810396	0	0	4.1	0.810396	0	0	4.2	0.825727	0	0	3	0.825727	0	0	3.1	0.825727	0	0	3.2	0.820686	0	0	2	0.820686	0	0	2.1	0.820686	0	0	2.2	0.823779	0	0	1	0.823779	0	0	1.1	0.823779	0	0	1.2	0.825175
	0.811881	0	0	4	0.811881	0	0	4.1	0.811881	0	0	4.2	0.827212	0	0	3	0.827212	0	0	3.1	0.827212	0	0	3.2	0.822171	0	0	2	0.822171	0	0	2.1	0.822171	0	0	2.2	0.825264	0	0	1	0.825264	0	0	1.1	0.825264	0	0	1.2	0.82666
	0.813088	0	0	4	0.813088	0	0	4.1	0.813088	0	0	4.2	0.828417	0	0	3	0.828417	0	0	3.1	0.828417	0	0	3.2	0.823378	0	0	2	0.823378	0	0	2.1	0.823378	0	0	2.2	0.826469	0	0	1	0.826469	0	0	1.1	0.826469	0	0	1.2	0.827867
	0.817596	0	0	4	0.817596	0	0	4.1	0.817596	0	0	4.2	0.832927	0	0	3	0.832927	0	0	3.1	0.832927	0	0	3.2	0.827886	0	0	2	0.827886	0	0	2.1	0.827886	0	0	2.2	0.830979	0	0	1	0.830979	0	0	1.1	0.830979	0	0	1.2	0.832375
	0.818852	0	0	4	0.818852	0	0	4.1	0.818852	0	0	4.2	0.834412	0	0	3	0.834412	0	0	3.1	0.834412	0	0	3.2	0.829371	0	0	2	0.829371	0	0	2.1	0.829371	0	0	2.2	0.832464	0	0	1	0.832464	0	0	1.1	0.832464	0	0	1.2	0.833866
	0.820337	0	0	4	0.820337	0	0	4.1	0.820337	0	0	4.2	0.835898	0	0	3	0.835898	0	0	3.1	0.835898	0	0	3.2	0.830856	0	0	2	0.830856	0	0	2.1	0.830856	0	0	2.2	0.83395	0	0	1	0.83395	0	0	1.1	0.83395	0	0	1.2	0.835354
	0.821544	0	0	4	0.821544	0	0	4.1	0.821544	0	0	4.2	0.837104	0	0	3	0.837104	0	0	3.1	0.837104	0	0	3.2	0.832061	0	0	2	0.832061	0	0	2.1	0.832061	0	0	2.2	0.835154	0	0	1	0.835154	0	0	1.1	0.835154	0	0	1.2	0.836561
	0.826052	0	0	4	0.826052	0	0	4.1	0.826052	0	0	4.2	0.841612	0	0	3	0.841612	0	0	3.1	0.841612	0	0	3.2	0.836571	0	0	2	0.836571	0	0	2.1	0.836571	0	0	2.2	0.839664	0	0	1	0.839664	0	0	1.1	0.839664	0	0	1.2	0.841069
	0.827538	0	0	4	0.827538	0	0	4.1	0.827538	0	0	4.2	0.843098	0	0	3	0.843098	0	0	3.1	0.843098	0	0	3.2	0.838056	0	0	2	0.838056	0	0	2.1	0.838056	0	0	2.2	0.841152	0	0	1	0.841152	0	0	1.1	0.841152	0	0	1.2	0.842566
	0.829023	0	0	4	0.829023	0	0	4.1	0.829023	0	0	4.2	0.844583	0	0	3	0.844583	0	0	3.1	0.844583	0	0	3.2	0.839542	0	0	2	0.839542	0	0	2.1	0.839542	0	0	2.2	0.842637	0	0	1	0.842637	0	0	1.1	0.842637	0	0	1.2	0.844052
	0.830228	0	0	4	0.830228	0	0	4.1	0.830228	0	0	4.2	0.845788	0	0	3	0.845788	0	0	3.1	0.845788	0	0	3.2	0.840746	0	0	2	0.840746	0	0	2.1	0.840746	0	0	2.2	0.843844	0	0	1	0.843844	0	0	1.1	0.843844	0	0	1.2	0.845256
	0.834738	0	0	4	0.834738	0	0	4.1	0.834738	0	0	4.2	0.85241	0	0	3	0.85241	0	0	3.1	0.85241	0	0	3.2	0.845363	0	0	2	0.845363	0	0	2.1	0.845363	0	0	2.2	0.848352	0	0	1	0.848352	0	0	1.1	0.848352	0	0	1.2	0.849877
	0.836223	0	0	4	0.836223	0	0	4.1	0.836223	0	0	4.2	0.853896	0	0	3	0.853896	0	0	3.1	0.853896	0	0	3.2	0.846848	0	0	2	0.846848	0	0	2.1	0.846848	0	0	2.2	0.849837	0	0	1	0.849837	0	0	1.1	0.849837	0	0	1.2	0.851362
	0.837708	0	0	4	0.837708	0	0	4.1	0.837708	0	0	4.2	0.855381	0	0	3	0.855381	0	0	3.1	0.855381	0	0	3.2	0.848333	0	0	2	0.848333	0	0	2.1	0.848333	0	0	2.2	0.851325	0	0	1	0.851325	0	0	1.1	0.851325	0	0	1.2	0.85285
	0.838913	0	0	4	0.838913	0	0	4.1	0.838913	0	0	4.2	0.856586	0	0	3	0.856586	0	0	3.1	0.856586	0	0	3.2	0.849538	0	0	2	0.849538	0	0	2.1	0.849538	0	0	2.2	0.852529	0	0	1	0.852529	0	0	1.1	0.852529	0	0	1.2	0.854054
	0.843534	0	0	4	0.843534	0	0	4.1	0.843534	0	0	4.2	0.861094	0	0	3	0.861094	0	0	3.1	0.861094	0	0	3.2	0.854048	0	0	2	0.854048	0	0	2.1	0.854048	0	0	2.2	0.857039	0	0	1	0.857039	0	0	1.1	0.857039	0	0	1.2	0.858562
	0.845019	0	0	4	0.845019	0	0	4.1	0.845019	0	0	4.2	0.862579	0	0	3	0.862579	0	0	3.1	0.862579	0	0	3.2	0.855533	0	0	2	0.855533	0	0	2.1	0.855533	0	0	2.2	0.858525	0	0	1	0.858525	0	0	1.1	0.858525	0	0	1.2	0.860048
	0.846515	0	0	4	0.846515	0	0	4.1	0.846515	0	0	4.2	0.864068	0	0	3	0.864068	0	0	3.1	0.864068	0	0	3.2	0.857019	0	0	2	0.857019	0	0	2.1	0.857019	0	0	2.2	0.860012	0	0	1	0.860012	0	0	1.1	0.860012	0	0	1.2	0.861537
	0.847719	0	0	4	0.847719	0	0	4.1	0.847719	0	0	4.2	0.865273	0	0	3	0.865273	0	0	3.1	0.865273	0	0	3.2	0.858226	0	0	2	0.858226	0	0	2.1	0.858226	0	0	2.2	0.861217	0	0	1	0.861217	0	0	1.1	0.861217	0	0	1.2	0.862742
	0.85223	0	0	4	0.85223	0	0	4.1	0.85223	0	0	4.2	0.869782	0	0	3	0.869782	0	0	3.1	0.869782	0	0	3.2	0.862734	0	0	2	0.862734	0	0	2.1	0.862734	0	0	2.2	0.865727	0	0	1	0.865727	0	0	1.1	0.865727	0	0	1.2	0.867252
	0.853715	0	0	4	0.853715	0	0	4.1	0.853715	0	0	4.2	0.871268	0	0	3	0.871268	0	0	3.1	0.871268	0	0	3.2	0.864219	0	0	2	0.864219	0	0	2.1	0.864219	0	0	2.2	0.867212	0	0	1	0.867212	0	0	1.1	0.867212	0	0	1.2	0.868737
	0.855202	0	0	4	0.855202	0	0	4.1	0.855202	0	0	4.2	0.872756	0	0	3	0.872756	0	0	3.1	0.872756	0	0	3.2	0.865704	0	0	2	0.865704	0	0	2.1	0.865704	0	0	2.2	0.868698	0	0	1	0.868698	0	0	1.1	0.868698	0	0	1.2	0.870223
	0.856407	0	0	4	0.856407	0	0	4.1	0.856407	0	0	4.2	0.873961	0	0	3	0.873961	0	0	3.1	0.873961	0	0	3.2	0.866909	0	0	2	0.866909	0	0	2.1	0.866909	0	0	2.2	0.869902	0	0	1	0.869902	0	0	1.1	0.869902	0	0	1.2	0.871427
	0.860917	0	0	4	0.860917	0	0	4.1	0.860917	0	0	4.2	0.878469	0	0	3	0.878469	0	0	3.1	0.878469	0	0	3.2	0.871419	0	0	2	0.871419	0	0	2.1	0.871419	0	0	2.2	0.874413	0	0	1	0.874413	0	0	1.1	0.874413	0	0	1.2	0.875938
	0.862402	0	0	4	0.862402	0	0	4.1	0.862402	0	0	4.2	0.879954	0	0	3	0.879954	0	0	3.1	0.879954	0	0	3.2	0.872906	0	0	2	0.872906	0	0	2.1	0.872906	0	0	2.2	0.875898	0	0	1	0.875898	0	0	1.1	0.875898	0	0	1.2	0.877423
	0.863887	0	0	4	0.863887	0	0	4.1	0.863887	0	0	4.2	0.881439	0	0	3	0.881439	0	0	3.1	0.881439	0	0	3.2	0.874392	0	0	2	0.874392	0	0	2.1	0.874392	0	0	2.2	0.877383	0	0	1	0.877383	0	0	1.1	0.877383	0	0	1.2	0.878906
	0.865092	0	0	4	0.865092	0	0	4.1	0.865092	0	0	4.2	0.882646	0	0	3	0.882646	0	0	3.1	0.882646	0	0	3.2	0.875596	0	0	2	0.875596	0	0	2.1	0.875596	0	0	2.2	0.878588	0	0	1	0.878588	0	0	1.1	0.878588	0	0	1.2	0.880113
	0.869831	0	0	4	0.869831	0	0	4.1	0.869831	0	0	4.2	0.887154	0	0	3	0.887154	0	0	3.1	0.887154	0	0	3.2	0.880335	0	0	2	0.880335	0	0	2.1	0.880335	0	0	2.2	0.883098	0	0	1	0.883098	0	0	1.1	0.883098	0	0	1.2	0.88485
	0.871319	0	0	4	0.871319	0	0	4.1	0.871319	0	0	4.2	0.888639	0	0	3	0.888639	0	0	3.1	0.888639	0	0	3.2	0.881821	0	0	2	0.881821	0	0	2.1	0.881821	0	0	2.2	0.884583	0	0	1	0.884583	0	0	1.1	0.884583	0	0	1.2	0.886337
	0.872806	0	0	4	0.872806	0	0	4.1	0.872806	0	0	4.2	0.890125	0	0	3	0.890125	0	0	3.1	0.890125	0	0	3.2	0.883306	0	0	2	0.883306	0	0	2.1	0.883306	0	0	2.2	0.886068	0	0	1	0.886068	0	0	1.1	0.886068	0	0	1.2	0.887823
	0.874813	0	0	4	0.874813	0	0	4.1	0.874813	0	0	4.2	0.891331	0	0	3	0.891331	0	0	3.1	0.891331	0	0	3.2	0.885317	0	0	2	0.885317	0	0	2.1	0.885317	0	0	2.2	0.887275	0	0	1	0.887275	0	0	1.1	0.887275	0	0	1.2	0.889836
	0.879321	0	0	4	0.879321	0	0	4.1	0.879321	0	0	4.2	0.89584	0	0	3	0.89584	0	0	3.1	0.89584	0	0	3.2	0.889825	0	0	2	0.889825	0	0	2.1	0.889825	0	0	2.2	0.891783	0	0	1	0.891783	0	0	1.1	0.891783	0	0	1.2	0.894344
	0.880808	0	0	4	0.880808	0	0	4.1	0.880808	0	0	4.2	0.897327	0	0	3	0.897327	0	0	3.1	0.897327	0	0	3.2	0.891311	0	0	2	0.891311	0	0	2.1	0.891311	0	0	2.2	0.89327	0	0	1	0.89327	0	0	1.1	0.89327	0	0	1.2	0.895829
	0.882296	0	0	4	0.882296	0	0	4.1	0.882296	0	0	4.2	0.898814	0	0	3	0.898814	0	0	3.1	0.898814	0	0	3.2	0.892796	0	0	2	0.892796	0	0	2.1	0.892796	0	0	2.2	0.894756	0	0	1	0.894756	0	0	1.1	0.894756	0	0	1.2	0.897316
	0.883501	0	0	4	0.883501	0	0	4.1	0.883501	0	0	4.2	0.900019	0	0	3	0.900019	0	0	3.1	0.900019	0	0	3.2	0.894001	0	0	2	0.894001	0	0	2.1	0.894001	0	0	2.2	0.895961	0	0	1	0.895961	0	0	1.1	0.895961	0	0	1.2	0.898521
	0.888009	0	0	4	0.888009	0	0	4.1	0.888009	0	0	4.2	0.904527	0	0	3	0.904527	0	0	3.1	0.904527	0	0	3.2	0.898511	0	0	2	0.898511	0	0	2.1	0.898511	0	0	2.2	0.900469	0	0	1	0.900469	0	0	1.1	0.900469	0	0	1.2	0.903258
	0.889496	0	0	4	0.889496	0	0	4.1	0.889496	0	0	4.2	0.906016	0	0	3	0.906016	0	0	3.1	0.906016	0	0	3.2	0.899996	0	0	2	0.899996	0	0	2.1	0.899996	0	0	2.2	0.901954	0	0	1	0.901954	0	0	1.1	0.901954	0	0	1.2	0.904743
	0.890983	0	0	4	0.890983	0	0	4.1	0.890983	0	0	4.2	0.907504	0	0	3	0.907504	0	0	3.1	0.907504	0	0	3.2	0.901481	0	0	2	0.901481	0	0	2.1	0.901481	0	0	2.2	0.903439	0	0	1	0.903439	0	0	1.1	0.903439	0	0	1.2	0.906229
	0.892188	0	0	4	0.892188	0	0	4.1	0.892188	0	0	4.2	0.908708	0	0	3	0.908708	0	0	3.1	0.908708	0	0	3.2	0.902686	0	0	2	0.902686	0	0	2.1	0.902686	0	0	2.2	0.904644	0	0	1	0.904644	0	0	1.1	0.904644	0	0	1.2	0.908238
	0.896698	0	0	4	0.896698	0	0	4.1	0.896698	0	0	4.2	0.913217	0	0	3	0.913217	0	0	3.1	0.913217	0	0	3.2	0.907194	0	0	2	0.907194	0	0	2.1	0.907194	0	0	2.2	0.909383	0	0	1	0.909383	0	0	1.1	0.909383	0	0	1.2	0.912975
	0.898185	0	0	4	0.898185	0	0	4.1	0.898185	0	0	4.2	0.914702	0	0	3	0.914702	0	0	3.1	0.914702	0	0	3.2	0.908681	0	0	2	0.908681	0	0	2.1	0.908681	0	0	2.2	0.910868	0	0	1	0.910868	0	0	1.1	0.910868	0	0	1.2	0.914462
	0.899671	0	0	4	0.899671	0	0	4.1	0.899671	0	0	4.2	0.916189	0	0	3	0.916189	0	0	3.1	0.916189	0	0	3.2	0.910169	0	0	2	0.910169	0	0	2.1	0.910169	0	0	2.2	0.912373	0	0	1	0.912373	0	0	1.1	0.912373	0	0	1.2	0.915948
	0.900876	0	0	4	0.900876	0	0	4.1	0.900876	0	0	4.2	0.917394	0	0	3	0.917394	0	0	3.1	0.917394	0	0	3.2	0.911374	0	0	2	0.911374	0	0	2.1	0.911374	0	0	2.2	0.91439	0	0	1	0.91439	0	0	1.1	0.91439	0	0	1.2	0.917952
	0.905384	0	0	4	0.905384	0	0	4.1	0.905384	0	0	4.2	0.921904	0	0	3	0.921904	0	0	3.1	0.921904	0	0	3.2	0.915884	0	0	2	0.915884	0	0	2.1	0.915884	0	0	2.2	0.918898	0	0	1	0.918898	0	0	1.1	0.918898	0	0	1.2	0.92246
	0.90664	0	0	4	0.90664	0	0	4.1	0.90664	0	0	4.2	0.923389	0	0	3	0.923389	0	0	3.1	0.923389	0	0	3.2	0.917369	0	0	2	0.917369	0	0	2.1	0.917369	0	0	2.2	0.920383	0	0	1	0.920383	0	0	1.1	0.920383	0	0	1.2	0.923946
	0.908127	0	0	4	0.908127	0	0	4.1	0.908127	0	0	4.2	0.924875	0	0	3	0.924875	0	0	3.1	0.924875	0	0	3.2	0.918856	0	0	2	0.918856	0	0	2.1	0.918856	0	0	2.2	0.921869	0	0	1	0.921869	0	0	1.1	0.921869	0	0	1.2	0.925431
	0.909332	0	0	4	0.909332	0	0	4.1	0.909332	0	0	4.2	0.926081	0	0	3	0.926081	0	0	3.1	0.926081	0	0	3.2	0.920061	0	0	2	0.920061	0	0	2.1	0.920061	0	0	2.2	0.923879	0	0	1	0.923879	0	0	1.1	0.923879	0	0	1.2	0.927436
	0.913842	0	0	4	0.913842	0	0	4.1	0.913842	0	0	4.2	0.930589	0	0	3	0.930589	0	0	3.1	0.930589	0	0	3.2	0.924571	0	0	2	0.924571	0	0	2.1	0.924571	0	0	2.2	0.928498	0	0	1	0.928498	0	0	1.1	0.928498	0	0	1.2	0.931944
	0.915327	0	0	4	0.915327	0	0	4.1	0.915327	0	0	4.2	0.932075	0	0	3	0.932075	0	0	3.1	0.932075	0	0	3.2	0.926056	0	0	2	0.926056	0	0	2.1	0.926056	0	0	2.2	0.929985	0	0	1	0.929985	0	0	1.1	0.929985	0	0	1.2	0.933429
	0.916813	0	0	4	0.916813	0	0	4.1	0.916813	0	0	4.2	0.93356	0	0	3	0.93356	0	0	3.1	0.93356	0	0	3.2	0.927542	0	0	2	0.927542	0	0	2.1	0.927542	0	0	2.2	0.931473	0	0	1	0.931473	0	0	1.1	0.931473	0	0	1.2	0.934914
	0.918019	0	0	4	0.918019	0	0	4.1	0.918019	0	0	4.2	0.934765	0	0	3	0.934765	0	0	3.1	0.934765	0	0	3.2	0.928746	0	0	2	0.928746	0	0	2.1	0.928746	0	0	2.2	0.932677	0	0	1	0.932677	0	0	1.1	0.932677	0	0	1.2	0.936119
	0.922527	0	0	4	0.922527	0	0	4.1	0.922527	0	0	4.2	0.939275	0	0	3	0.939275	0	0	3.1	0.939275	0	0	3.2	0.933255	0	0	2	0.933255	0	0	2.1	0.933255	0	0	2.2	0.937185	0	0	1	0.937185	0	0	1.1	0.937185	0	0	1.2	0.940629
	0.924015	0	0	4	0.924015	0	0	4.1	0.924015	0	0	4.2	0.94076	0	0	3	0.94076	0	0	3.1	0.94076	0	0	3.2	0.934744	0	0	2	0.934744	0	0	2.1	0.934744	0	0	2.2	0.938673	0	0	1	0.938673	0	0	1.1	0.938673	0	0	1.2	0.942114
	0.925502	0	0	4	0.925502	0	0	4.1	0.925502	0	0	4.2	0.942245	0	0	3	0.942245	0	0	3.1	0.942245	0	0	3.2	0.936229	0	0	2	0.936229	0	0	2.1	0.936229	0	0	2.2	0.940158	0	0	1	0.940158	0	0	1.1	0.940158	0	0	1.2	0.943602
	0.926707	0	0	4	0.926707	0	0	4.1	0.926707	0	0	4.2	0.943452	0	0	3	0.943452	0	0	3.1	0.943452	0	0	3.2	0.937436	0	0	2	0.937436	0	0	2.1	0.937436	0	0	2.2	0.941365	0	0	1	0.941365	0	0	1.1	0.941365	0	0	1.2	0.944806
	0.931215	0	0	4	0.931215	0	0	4.1	0.931215	0	0	4.2	0.94796	0	0	3	0.94796	0	0	3.1	0.94796	0	0	3.2	0.942173	0	0	2	0.942173	0	0	2.1	0.942173	0	0	2.2	0.946102	0	0	1	0.946102	0	0	1.1	0.946102	0	0	1.2	0.949317
	0.9327	0	0	4	0.9327	0	0	4.1	0.9327	0	0	4.2	0.949448	0	0	3	0.949448	0	0	3.1	0.949448	0	0	3.2	0.943658	0	0	2	0.943658	0	0	2.1	0.943658	0	0	2.2	0.947587	0	0	1	0.947587	0	0	1.1	0.947587	0	0	1.2	0.950802
	0.934185	0	0	4	0.934185	0	0	4.1	0.934185	0	0	4.2	0.950935	0	0	3	0.950935	0	0	3.1	0.950935	0	0	3.2	0.945144	0	0	2	0.945144	0	0	2.1	0.945144	0	0	2.2	0.949073	0	0	1	0.949073	0	0	1.1	0.949073	0	0	1.2	0.952287
	0.935392	0	0	4	0.935392	0	0	4.1	0.935392	0	0	4.2	0.95214	0	0	3	0.95214	0	0	3.1	0.95214	0	0	3.2	0.947149	0	0	2	0.947149	0	0	2.1	0.947149	0	0	2.2	0.951084	0	0	1	0.951084	0	0	1.1	0.951084	0	0	1.2	0.953494
	0.9399	0	0	4	0.9399	0	0	4.1	0.9399	0	0	4.2	0.956648	0	0	3	0.956648	0	0	3.1	0.956648	0	0	3.2	0.951659	0	0	2	0.951659	0	0	2.1	0.951659	0	0	2.2	0.955594	0	0	1	0.955594	0	0	1.1	0.955594	0	0	1.2	0.958002
	0.941385	0	0	4	0.941385	0	0	4.1	0.941385	0	0	4.2	0.958135	0	0	3	0.958135	0	0	3.1	0.958135	0	0	3.2	0.953144	0	0	2	0.953144	0	0	2.1	0.953144	0	0	2.2	0.957081	0	0	1	0.957081	0	0	1.1	0.957081	0	0	1.2	0.959487
	0.942871	0	0	4	0.942871	0	0	4.1	0.942871	0	0	4.2	0.959618	0	0	3	0.959618	0	0	3.1	0.959618	0	0	3.2	0.954629	0	0	2	0.954629	0	0	2.1	0.954629	0	0	2.2	0.958566	0	0	1	0.958566	0	0	1.1	0.958566	0	0	1.2	0.960973
	0.944076	0	0	4	0.944076	0	0	4.1	0.944076	0	0	4.2	0.960825	0	0	3	0.960825	0	0	3.1	0.960825	0	0	3.2	0.955836	0	0	2	0.955836	0	0	2.1	0.955836	0	0	2.2	0.959771	0	0	1	0.959771	0	0	1.1	0.959771	0	0	1.2	0.962177
	0.948586	0	0	4	0.948586	0	0	4.1	0.948586	0	0	4.2	0.965333	0	0	3	0.965333	0	0	3.1	0.965333	0	0	3.2	0.960344	0	0	2	0.960344	0	0	2.1	0.960344	0	0	2.2	0.964281	0	0	1	0.964281	0	0	1.1	0.964281	0	0	1.2	0.966688
	0.950073	0	0	4	0.950073	0	0	4.1	0.950073	0	0	4.2	0.966821	0	0	3	0.966821	0	0	3.1	0.966821	0	0	3.2	0.961829	0	0	2	0.961829	0	0	2.1	0.961829	0	0	2.2	0.965766	0	0	1	0.965766	0	0	1.1	0.965766	0	0	1.2	0.968173
	0.951558	0	0	4	0.951558	0	0	4.1	0.951558	0	0	4.2	0.968308	0	0	3	0.968308	0	0	3.1	0.968308	0	0	3.2	0.963315	0	0	2	0.963315	0	0	2.1	0.963315	0	0	2.2	0.96725	0	0	1	0.96725	0	0	1.1	0.96725	0	0	1.2	0.969658
	0.952765	0	0	4	0.952765	0	0	4.1	0.952765	0	0	4.2	0.969513	0	0	3	0.969513	0	0	3.1	0.969513	0	0	3.2	0.964519	0	0	2	0.964519	0	0	2.1	0.964519	0	0	2.2	0.968457	0	0	1	0.968457	0	0	1.1	0.968457	0	0	1.2	0.970863
	0.957273	0	0	4	0.957273	0	0	4.1	0.957273	0	0	4.2	0.974021	0	0	3	0.974021	0	0	3.1	0.974021	0	0	3.2	0.96903	0	0	2	0.96903	0	0	2.1	0.96903	0	0	2.2	0.972965	0	0	1	0.972965	0	0	1.1	0.972965	0	0	1.2	0.975371
	0.95876	0	0	4	0.95876	0	0	4.1	0.95876	0	0	4.2	0.975279	0	0	3	0.975279	0	0	3.1	0.975279	0	0	3.2	0.970515	0	0	2	0.970515	0	0	2.1	0.970515	0	0	2.2	0.974452	0	0	1	0.974452	0	0	1.1	0.974452	0	0	1.2	0.976858
	0.960246	0	0	4	0.960246	0	0	4.1	0.960246	0	0	4.2	0.976764	0	0	3	0.976764	0	0	3.1	0.976764	0	0	3.2	0.972002	0	0	2	0.972002	0	0	2.1	0.972002	0	0	2.2	0.975937	0	0	1	0.975937	0	0	1.1	0.975937	0	0	1.2	0.978343
	0.961451	0	0	4	0.961451	0	0	4.1	0.961451	0	0	4.2	0.977971	0	0	3	0.977971	0	0	3.1	0.977971	0	0	3.2	0.973207	0	0	2	0.973207	0	0	2.1	0.973207	0	0	2.2	0.977142	0	0	1	0.977142	0	0	1.1	0.977142	0	0	1.2	0.979548
	0.965959	0	0	4	0.965959	0	0	4.1	0.965959	0	0	4.2	0.982479	0	0	3	0.982479	0	0	3.1	0.982479	0	0	3.2	0.977717	0	0	2	0.977717	0	0	2.1	0.977717	0	0	2.2	0.981652	0	0	1	0.981652	0	0	1.1	0.981652	0	0	1.2	0.984058
	0.967444	0	0	4	0.967444	0	0	4.1	0.967444	0	0	4.2	0.983964	0	0	3	0.983964	0	0	3.1	0.983964	0	0	3.2	0.979202	0	0	2	0.979202	0	0	2.1	0.979202	0	0	2.2	0.983137	0	0	1	0.983137	0	0	1.1	0.983137	0	0	1.2	0.985546
	0.968929	0	0	4	0.968929	0	0	4.1	0.968929	0	0	4.2	0.985452	0	0	3	0.985452	0	0	3.1	0.985452	0	0	3.2	0.980688	0	0	2	0.980688	0	0	2.1	0.980688	0	0	2.2	0.984621	0	0	1	0.984621	0	0	1.1	0.984621	0	0	1.2	0.987033
	0.970136	0	0	4	0.970136	0	0	4.1	0.970136	0	0	4.2	0.986657	0	0	3	0.986657	0	0	3.1	0.986657	0	0	3.2	0.981892	0	0	2	0.981892	0	0	2.1	0.981892	0	0	2.2	0.985827	0	0	1	0.985827	0	0	1.1	0.985827	0	0	1.2	0.988238
	0.974644	0	0	4	0.974644	0	0	4.1	0.974644	0	0	4.2	0.991165	0	0	3	0.991165	0	0	3.1	0.991165	0	0	3.2	0.986401	0	0	2	0.986401	0	0	2.1	0.986401	0	0	2.2	0.990336	0	0	1	0.990336	0	0	1.1	0.990336	0	0	1.2	0.992748
	0.976131	0	0	4	0.976131	0	0	4.1	0.976131	0	0	4.2	0.992652	0	0	3	0.992652	0	0	3.1	0.992652	0	0	3.2	0.987888	0	0	2	0.987888	0	0	2.1	0.987888	0	0	2.2	0.991823	0	0	1	0.991823	0	0	1.1	0.991823	0	0	1.2	0.994233
	0.977619	0	0	4	0.977619	0	0	4.1	0.977619	0	0	4.2	0.994137	0	0	3	0.994137	0	0	3.1	0.994137	0	0	3.2	0.989373	0	0	2	0.989373	0	0	2.1	0.989373	0	0	2.2	0.993308	0	0	1	0.993308	0	0	1.1	0.993308	0	0	1.2	0.995721
	0.978823	0	0	4	0.978823	0	0	4.1	0.978823	0	0	4.2	0.995344	0	0	3	0.995344	0	0	3.1	0.995344	0	0	3.2	0.990578	0	0	2	0.990578	0	0	2.1	0.990578	0	0	2.2	0.994513	0	0	1	0.994513	0	0	1.1	0.994513	0	0	1.2	0.996927
	0.983332	0	0	4	0.983332	0	0	4.1	0.983332	0	0	4.2	0.999852	0	0	3	0.999852	0	0	3.1	0.999852	0	0	3.2	0.995086	0	0	2	0.995086	0	0	2.1	0.995086	0	0	2.2	0.999023	0	0	1	0.999023	0	0	1.1	0.999023	0	0	1.2	1.00144
	0.98459	0	0	4	0.98459	0	0	4.1	0.98459	0	0	4.2	1.00134	0	0	3	1.00134	0	0	3.1	1.00134	0	0	3.2	0.996573	0	0	2	0.996573	0	0	2.1	0.996573	0	0	2.2	1.00051	0	0	1	1.00051	0	0	1.1	1.00051	0	0	1.2	1.00292
	0.986075	0	0	4	0.986075	0	0	4.1	0.986075	0	0	4.2	1.00282	0	0	3	1.00282	0	0	3.1	1.00282	0	0	3.2	0.998058	0	0	2	0.998058	0	0	2.1	0.998058	0	0	2.2	1.00199	0	0	1	1.00199	0	0	1.1	1.00199	0	0	1.2	1.00441
	0.98728	0	0	4	0.98728	0	0	4.1	0.98728	0	0	4.2	1.00403	0	0	3	1.00403	0	0	3.1	1.00403	0	0	3.2	0.999263	0	0	2	0.999263	0	0	2.1	0.999263	0	0	2.2	1.0032	0	0	1	1.0032	0	0	1.1	1.0032	0	0	1.2	1.00561
	0.99179	0	0	4	0.99179	0	0	4.1	0.99179	0	0	4.2	1.01065	0	0	3	1.01065	0	0	3.1	1.01065	0	0	3.2	1.00377	0	0	2	1.00377	0	0	2.1	1.00377	0	0	2.2	1.00771	0	0	1	1.00771	0	0	1.1	1.00771	0	0	1.2	1.01022
	0.993275	0	0	4	0.993275	0	0	4.1	0.993275	0	0	4.2	1.01214	0	0	3	1.01214	0	0	3.1	1.01214	0	0	3.2	1.00526	0	0	2	1.00526	0	0	2.1	1.00526	0	0	2.2	1.00896	0	0	1	1.00896	0	0	1.1	1.00896	0	0	1.2	1.01171
	0.99476	0	0	4	0.99476	0	0	4.1	0.99476	0	0	4.2	1.01362	0	0	3	1.01362	0	0	3.1	1.01362	0	0	3.2	1.00675	0	0	2	1.00675	0	0	2.1	1.00675	0	0	2.2	1.01045	0	0	1	1.01045	0	0	1.1	1.01045	0	0	1.2	1.01322
	0.995965	0	0	4	0.995965	0	0	4.1	0.995965	0	0	4.2	1.01483	0	0	3	1.01483	0	0	3.1	1.01483	0	0	3.2	1.00795	0	0	2	1.00795	0	0	2.1	1.00795	0	0	2.2	1.01166	0	0	1	1.01166	0	0	1.1	1.01166	0	0	1.2	1.01442
	1.00047	0	0	4	1.00047	0	0	4.1	1.00047	0	0	4.2	1.01934	0	0	3	1.01934	0	0	3.1	1.01934	0	0	3.2	1.01246	0	0	2	1.01246	0	0	2.1	1.01246	0	0	2.2	1.01827	0	0	1	1.01827	0	0	1.1	1.01827	0	0	1.2	1.01893
	1.00196	0	0	4	1.00196	0	0	4.1	1.00196	0	0	4.2	1.02082	0	0	3	1.02082	0	0	3.1	1.02082	0	0	3.2	1.01395	0	0	2	1.01395	0	0	2.1	1.01395	0	0	2.2	1.01976	0	0	1	1.01976	0	0	1.1	1.01976	0	0	1.2	1.02042
	1.00345	0	0	4	1.00345	0	0	4.1	1.00345	0	0	4.2	1.02231	0	0	3	1.02231	0	0	3.1	1.02231	0	0	3.2	1.01543	0	0	2	1.01543	0	0	2.1	1.01543	0	0	2.2	1.02125	0	0	1	1.02125	0	0	1.1	1.02125	0	0	1.2	1.0219
	1.00465	0	0	4	1.00465	0	0	4.1	1.00465	0	0	4.2	1.02351	0	0	3	1.02351	0	0	3.1	1.02351	0	0	3.2	1.01664	0	0	2	1.01664	0	0	2.1	1.01664	0	0	2.2	1.02245	0	0	1	1.02245	0	0	1.1	1.02245	0	0	1.2	1.02311
	1.00927	0	0	4	1.00927	0	0	4.1	1.00927	0	0	4.2	1.02802	0	0	3	1.02802	0	0	3.1	1.02802	0	0	3.2	1.02115	0	0	2	1.02115	0	0	2.1	1.02115	0	0	2.2	1.02696	0	0	1	1.02696	0	0	1.1	1.02696	0	0	1.2	1.02762
	1.01075	0	0	4	1.01075	0	0	4.1	1.01075	0	0	4.2	1.02951	0	0	3	1.02951	0	0	3.1	1.02951	0	0	3.2	1.02263	0	0	2	1.02263	0	0	2.1	1.02263	0	0	2.2	1.02845	0	0	1	1.02845	0	0	1.1	1.02845	0	0	1.2	1.0291
	1.01224	0	0	4	1.01224	0	0	4.1	1.01224	0	0	4.2	1.031	0	0	3	1.031	0	0	3.1	1.031	0	0	3.2	1.02412	0	0	2	1.02412	0	0	2.1	1.02412	0	0	2.2	1.02993	0	0	1	1.02993	0	0	1.1	1.02993	0	0	1.2	1.03059
	1.01344	0	0	4	1.01344	0	0	4.1	1.01344	0	0	4.2	1.0322	0	0	3	1.0322	0	0	3.1	1.0322	0	0	3.2	1.02533	0	0	2	1.02533	0	0	2.1	1.02533	0	0	2.2	1.03114	0	0	1	1.03114	0	0	1.1	1.03114	0	0	1.2	1.03179
	1.01795	0	0	4	1.01795	0	0	4.1	1.01795	0	0	4.2	1.03671	0	0	3	1.03671	0	0	3.1	1.03671	0	0	3.2	1.02984	0	0	2	1.02984	0	0	2.1	1.02984	0	0	2.2	1.03565	0	0	1	1.03565	0	0	1.1	1.03565	0	0	1.2	1.0363
	1.01944	0	0	4	1.01944	0	0	4.1	1.01944	0	0	4.2	1.0382	0	0	3	1.0382	0	0	3.1	1.0382	0	0	3.2	1.03132	0	0	2	1.03132	0	0	2.1	1.03132	0	0	2.2	1.03713	0	0	1	1.03713	0	0	1.1	1.03713	0	0	1.2	1.03779
	1.02093	0	0	4	1.02093	0	0	4.1	1.02093	0	0	4.2	1.03968	0	0	3	1.03968	0	0	3.1	1.03968	0	0	3.2	1.03281	0	0	2	1.03281	0	0	2.1	1.03281	0	0	2.2	1.03862	0	0	1	1.03862	0	0	1.1	1.03862	0	0	1.2	1.03927
	1.02213	0	0	4	1.02213	0	0	4.1	1.02213	0	0	4.2	1.04089	0	0	3	1.04089	0	0	3.1	1.04089	0	0	3.2	1.03402	0	0	2	1.03402	0	0	2.1	1.03402	0	0	2.2	1.03982	0	0	1	1.03982	0	0	1.1	1.03982	0	0	1.2	1.04048
	1.02664	0	0	4	1.02664	0	0	4.1	1.02664	0	0	4.2	1.0454	0	0	3	1.0454	0	0	3.1	1.0454	0	0	3.2	1.03852	0	0	2	1.03852	0	0	2.1	1.03852	0	0	2.2	1.04433	0	0	1	1.04433	0	0	1.1	1.04433	0	0	1.2	1.04499
	1.02813	0	0	4	1.02813	0	0	4.1	1.02813	0	0	4.2	1.04688	0	0	3	1.04688	0	0	3.1	1.04688	0	0	3.2	1.04001	0	0	2	1.04001	0	0	2.1	1.04001	0	0	2.2	1.04582	0	0	1	1.04582	0	0	1.1	1.04582	0	0	1.2	1.04647
	1.02961	0	0	4	1.02961	0	0	4.1	1.02961	0	0	4.2	1.04837	0	0	3	1.04837	0	0	3.1	1.04837	0	0	3.2	1.04149	0	0	2	1.04149	0	0	2.1	1.04149	0	0	2.2	1.0473	0	0	1	1.0473	0	0	1.1	1.0473	0	0	1.2	1.04796
	1.03162	0	0	4	1.03162	0	0	4.1	1.03162	0	0	4.2	1.04957	0	0	3	1.04957	0	0	3.1	1.04957	0	0	3.2	1.0427	0	0	2	1.0427	0	0	2.1	1.0427	0	0	2.2	1.04851	0	0	1	1.04851	0	0	1.1	1.04851	0	0	1.2	1.04996
	1.03613	0	0	4	1.03613	0	0	4.1	1.03613	0	0	4.2	1.05408	0	0	3	1.05408	0	0	3.1	1.05408	0	0	3.2	1.04721	0	0	2	1.04721	0	0	2.1	1.04721	0	0	2.2	1.05302	0	0	1	1.05302	0	0	1.1	1.05302	0	0	1.2	1.05447
	1.03762	0	0	4	1.03762	0	0	4.1	1.03762	0	0	4.2	1.05557	0	0	3	1.05557	0	0	3.1	1.05557	0	0	3.2	1.04869	0	0	2	1.04869	0	0	2.1	1.04869	0	0	2.2	1.05451	0	0	1	1.05451	0	0	1.1	1.05451	0	0	1.2	1.05596
	1.0391	0	0	4	1.0391	0	0	4.1	1.0391	0	0	4.2	1.05705	0	0	3	1.05705	0	0	3.1	1.05705	0	0	3.2	1.05018	0	0	2	1.05018	0	0	2.1	1.05018	0	0	2.2	1.05599	0	0	1	1.05599	0	0	1.1	1.05599	0	0	1.2	1.05744
	1.04031	0	0	4	1.04031	0	0	4.1	1.04031	0	0	4.2	1.05826	0	0	3	1.05826	0	0	3.1	1.05826	0	0	3.2	1.05138	0	0	2	1.05138	0	0	2.1	1.05138	0	0	2.2	1.0572	0	0	1	1.0572	0	0	1.1	1.0572	0	0	1.2	1.05865
	1.04482	0	0	4	1.04482	0	0	4.1	1.04482	0	0	4.2	1.06277	0	0	3	1.06277	0	0	3.1	1.06277	0	0	3.2	1.05589	0	0	2	1.05589	0	0	2.1	1.05589	0	0	2.2	1.06171	0	0	1	1.06171	0	0	1.1	1.06171	0	0	1.2	1.06316
	1.0463	0	0	4	1.0463	0	0	4.1	1.0463	0	0	4.2	1.06425	0	0	3	1.06425	0	0	3.1	1.06425	0	0	3.2	1.05736	0	0	2	1.05736	0	0	2.1	1.05736	0	0	2.2	1.06319	0	0	1	1.06319	0	0	1.1	1.06319	0	0	1.2	1.06464
	1.04779	0	0	4	1.04779	0	0	4.1	1.04779	0	0	4.2	1.06574	0	0	3	1.06574	0	0	3.1	1.06574	0	0	3.2	1.05884	0	0	2	1.05884	0	0	2.1	1.05884	0	0	2.2	1.06468	0	0	1	1.06468	0	0	1.1	1.06468	0	0	1.2	1.06613
	1.04899	0	0	4	1.04899	0	0	4.1	1.04899	0	0	4.2	1.06694	0	0	3	1.06694	0	0	3.1	1.06694	0	0	3.2	1.06005	0	0	2	1.06005	0	0	2.1	1.06005	0	0	2.2	1.06589	0	0	1	1.06589	0	0	1.1	1.06589	0	0	1.2	1.06813
	1.0535	0	0	4	1.0535	0	0	4.1	1.0535	0	0	4.2	1.07145	0	0	3	1.07145	0	0	3.1	1.07145	0	0	3.2	1.06456	0	0	2	1.06456	0	0	2.1	1.06456	0	0	2.2	1.07039	0	0	1	1.07039	0	0	1.1	1.07039	0	0	1.2	1.07264
	1.05499	0	0	4	1.05499	0	0	4.1	1.05499	0	0	4.2	1.07294	0	0	3	1.07294	0	0	3.1	1.07294	0	0	3.2	1.06604	0	0	2	1.06604	0	0	2.1	1.06604	0	0	2.2	1.07188	0	0	1	1.07188	0	0	1.1	1.07188	0	0	1.2	1.07413
	1.05648	0	0	4	1.05648	0	0	4.1	1.05648	0	0	4.2	1.07442	0	0	3	1.07442	0	0	3.1	1.07442	0	0	3.2	1.06753	0	0	2	1.06753	0	0	2.1	1.06753	0	0	2.2	1.07337	0	0	1	1.07337	0	0	1.1	1.07337	0	0	1.2	1.07561
	1.05768	0	0	4	1.05768	0	0	4.1	1.05768	0	0	4.2	1.07563	0	0	3	1.07563	0	0	3.1	1.07563	0	0	3.2	1.06874	0	0	2	1.06874	0	0	2.1	1.06874	0	0	2.2	1.0754	0	0	1	1.0754	0	0	1.1	1.0754	0	0	1.2	1.07761
	1.06219	0	0	4	1.06219	0	0	4.1	1.06219	0	0	4.2	1.08038	0	0	3	1.08038	0	0	3.1	1.08038	0	0	3.2	1.07324	0	0	2	1.07324	0	0	2.1	1.07324	0	0	2.2	1.08002	0	0	1	1.08002	0	0	1.1	1.08002	0	0	1.2	1.08212
	1.06368	0	0	4	1.06368	0	0	4.1	1.06368	0	0	4.2	1.08187	0	0	3	1.08187	0	0	3.1	1.08187	0	0	3.2	1.07473	0	0	2	1.07473	0	0	2.1	1.07473	0	0	2.2	1.0815	0	0	1	1.0815	0	0	1.1	1.0815	0	0	1.2	1.08361
	1.06518	0	0	4	1.06518	0	0	4.1	1.06518	0	0	4.2	1.08336	0	0	3	1.08336	0	0	3.1	1.08336	0	0	3.2	1.07622	0	0	2	1.07622	0	0	2.1	1.07622	0	0	2.2	1.08299	0	0	1	1.08299	0	0	1.1	1.08299	0	0	1.2	1.08509
	1.06638	0	0	4	1.06638	0	0	4.1	1.06638	0	0	4.2	1.08538	0	0	3	1.08538	0	0	3.1	1.08538	0	0	3.2	1.07742	0	0	2	1.07742	0	0	2.1	1.07742	0	0	2.2	1.08501	0	0	1	1.08501	0	0	1.1	1.08501	0	0	1.2	1.0863
	1.07089	0	0	4	1.07089	0	0	4.1	1.07089	0	0	4.2	1.08989	0	0	3	1.08989	0	0	3.1	1.08989	0	0	3.2	1.08193	0	0	2	1.08193	0	0	2.1	1.08193	0	0	2.2	1.08952	0	0	1	1.08952	0	0	1.1	1.08952	0	0	1.2	1.09081
	1.07238	0	0	4	1.07238	0	0	4.1	1.07238	0	0	4.2	1.09137	0	0	3	1.09137	0	0	3.1	1.09137	0	0	3.2	1.08342	0	0	2	1.08342	0	0	2.1	1.08342	0	0	2.2	1.09103	0	0	1	1.09103	0	0	1.1	1.09103	0	0	1.2	1.09229
	1.07386	0	0	4	1.07386	0	0	4.1	1.07386	0	0	4.2	1.09286	0	0	3	1.09286	0	0	3.1	1.09286	0	0	3.2	1.0849	0	0	2	1.0849	0	0	2.1	1.0849	0	0	2.2	1.09251	0	0	1	1.09251	0	0	1.1	1.09251	0	0	1.2	1.09378
	1.07507	0	0	4	1.07507	0	0	4.1	1.07507	0	0	4.2	1.09406	0	0	3	1.09406	0	0	3.1	1.09406	0	0	3.2	1.08611	0	0	2	1.08611	0	0	2.1	1.08611	0	0	2.2	1.09454	0	0	1	1.09454	0	0	1.1	1.09454	0	0	1.2	1.09499
	1.07958	0	0	4	1.07958	0	0	4.1	1.07958	0	0	4.2	1.09857	0	0	3	1.09857	0	0	3.1	1.09857	0	0	3.2	1.09062	0	0	2	1.09062	0	0	2.1	1.09062	0	0	2.2	1.09905	0	0	1	1.09905	0	0	1.1	1.09905	0	0	1.2	1.09949
	1.08106	0	0	4	1.08106	0	0	4.1	1.08106	0	0	4.2	1.10006	0	0	3	1.10006	0	0	3.1	1.10006	0	0	3.2	1.0921	0	0	2	1.0921	0	0	2.1	1.0921	0	0	2.2	1.10054	0	0	1	1.10054	0	0	1.1	1.10054	0	0	1.2	1.10098
	1.08239	0	0	4	1.08239	0	0	4.1	1.08239	0	0	4.2	1.10154	0	0	3	1.10154	0	0	3.1	1.10154	0	0	3.2	1.09336	0	0	2	1.09336	0	0	2.1	1.09336	0	0	2.2	1.10202	0	0	1	1.10202	0	0	1.1	1.10202	0	0	1.2	1.10247
	1.0836	0	0	4	1.0836	0	0	4.1	1.0836	0	0	4.2	1.10275	0	0	3	1.10275	0	0	3.1	1.10275	0	0	3.2	1.09457	0	0	2	1.09457	0	0	2.1	1.09457	0	0	2.2	1.10323	0	0	1	1.10323	0	0	1.1	1.10323	0	0	1.2	1.10447
	1.08811	0	0	4	1.08811	0	0	4.1	1.08811	0	0	4.2	1.10726	0	0	3	1.10726	0	0	3.1	1.10726	0	0	3.2	1.09931	0	0	2	1.09931	0	0	2.1	1.09931	0	0	2.2	1.10774	0	0	1	1.10774	0	0	1.1	1.10774	0	0	1.2	1.10898
	1.08959	0	0	4	1.08959	0	0	4.1	1.08959	0	0	4.2	1.10874	0	0	3	1.10874	0	0	3.1	1.10874	0	0	3.2	1.10079	0	0	2	1.10079	0	0	2.1	1.10079	0	0	2.2	1.10922	0	0	1	1.10922	0	0	1.1	1.10922	0	0	1.2	1.11024
	1.09108	0	0	4	1.09108	0	0	4.1	1.09108	0	0	4.2	1.11023	0	0	3	1.11023	0	0	3.1	1.11023	0	0	3.2	1.10228	0	0	2	1.10228	0	0	2.1	1.10228	0	0	2.2	1.11071	0	0	1	1.11071	0	0	1.1	1.11071	0	0	1.2	1.11172
	1.09228	0	0	4	1.09228	0	0	4.1	1.09228	0	0	4.2	1.11144	0	0	3	1.11144	0	0	3.1	1.11144	0	0	3.2	1.1043	0	0	2	1.1043	0	0	2.1	1.1043	0	0	2.2	1.11191	0	0	1	1.11191	0	0	1.1	1.11191	0	0	1.2	1.11293
	1.09679	0	0	4	1.09679	0	0	4.1	1.09679	0	0	4.2	1.11594	0	0	3	1.11594	0	0	3.1	1.11594	0	0	3.2	1.10881	0	0	2	1.10881	0	0	2.1	1.10881	0	0	2.2	1.11642	0	0	1	1.11642	0	0	1.1	1.11642	0	0	1.2	1.11744
	1.09828	0	0	4	1.09828	0	0	4.1	1.09828	0	0	4.2	1.11743	0	0	3	1.11743	0	0	3.1	1.11743	0	0	3.2	1.1103	0	0	2	1.1103	0	0	2.1	1.1103	0	0	2.2	1.11791	0	0	1	1.11791	0	0	1.1	1.11791	0	0	1.2	1.11892
	1.09976	0	0	4	1.09976	0	0	4.1	1.09976	0	0	4.2	1.11891	0	0	3	1.11891	0	0	3.1	1.11891	0	0	3.2	1.1118	0	0	2	1.1118	0	0	2.1	1.1118	0	0	2.2	1.1194	0	0	1	1.1194	0	0	1.1	1.1194	0	0	1.2	1.12041
	1.10097	0	0	4	1.10097	0	0	4.1	1.10097	0	0	4.2	1.12012	0	0	3	1.12012	0	0	3.1	1.12012	0	0	3.2	1.11301	0	0	2	1.11301	0	0	2.1	1.11301	0	0	2.2	1.1206	0	0	1	1.1206	0	0	1.1	1.1206	0	0	1.2	1.12161
	1.10548	0	0	4	1.10548	0	0	4.1	1.10548	0	0	4.2	1.12463	0	0	3	1.12463	0	0	3.1	1.12463	0	0	3.2	1.11752	0	0	2	1.11752	0	0	2.1	1.11752	0	0	2.2	1.12511	0	0	1	1.12511	0	0	1.1	1.12511	0	0	1.2	1.12612
	1.10697	0	0	4	1.10697	0	0	4.1	1.10697	0	0	4.2	1.12612	0	0	3	1.12612	0	0	3.1	1.12612	0	0	3.2	1.119	0	0	2	1.119	0	0	2.1	1.119	0	0	2.2	1.12659	0	0	1	1.12659	0	0	1.1	1.12659	0	0	1.2	1.12761
	1.10845	0	0	4	1.10845	0	0	4.1	1.10845	0	0	4.2	1.1276	0	0	3	1.1276	0	0	3.1	1.1276	0	0	3.2	1.12049	0	0	2	1.12049	0	0	2.1	1.12049	0	0	2.2	1.12808	0	0	1	1.12808	0	0	1.1	1.12808	0	0	1.2	1.1291
	1.10966	0	0	4	1.10966	0	0	4.1	1.10966	0	0	4.2	1.12881	0	0	3	1.12881	0	0	3.1	1.12881	0	0	3.2	1.1217	0	0	2	1.1217	0	0	2.1	1.1217	0	0	2.2	1.12929	0	0	1	1.12929	0	0	1.1	1.12929	0	0	1.2	1.1303
	1.11416	0	0	4	1.11416	0	0	4.1	1.11416	0	0	4.2	1.13331	0	0	3	1.13331	0	0	3.1	1.13331	0	0	3.2	1.1262	0	0	2	1.1262	0	0	2.1	1.1262	0	0	2.2	1.13379	0	0	1	1.13379	0	0	1.1	1.13379	0	0	1.2	1.13481
	1.11565	0	0	4	1.11565	0	0	4.1	1.11565	0	0	4.2	1.13457	0	0	3	1.13457	0	0	3.1	1.13457	0	0	3.2	1.12769	0	0	2	1.12769	0	0	2.1	1.12769	0	0	2.2	1.13528	0	0	1	1.13528	0	0	1.1	1.13528	0	0	1.2	1.13606
	1.11714	0	0	4	1.11714	0	0	4.1	1.11714	0	0	4.2	1.13606	0	0	3	1.13606	0	0	3.1	1.13606	0	0	3.2	1.12918	0	0	2	1.12918	0	0	2.1	1.12918	0	0	2.2	1.13677	0	0	1	1.13677	0	0	1.1	1.13677	0	0	1.2	1.13755
	1.11835	0	0	4	1.11835	0	0	4.1	1.11835	0	0	4.2	1.13726	0	0	3	1.13726	0	0	3.1	1.13726	0	0	3.2	1.13038	0	0	2	1.13038	0	0	2.1	1.13038	0	0	2.2	1.13797	0	0	1	1.13797	0	0	1.1	1.13797	0	0	1.2	1.13876
	1.12286	0	0	4	1.12286	0	0	4.1	1.12286	0	0	4.2	1.14177	0	0	3	1.14177	0	0	3.1	1.14177	0	0	3.2	1.13489	0	0	2	1.13489	0	0	2.1	1.13489	0	0	2.2	1.14248	0	0	1	1.14248	0	0	1.1	1.14248	0	0	1.2	1.14327
	1.12434	0	0	4	1.12434	0	0	4.1	1.12434	0	0	4.2	1.14326	0	0	3	1.14326	0	0	3.1	1.14326	0	0	3.2	1.13638	0	0	2	1.13638	0	0	2.1	1.13638	0	0	2.2	1.14396	0	0	1	1.14396	0	0	1.1	1.14396	0	0	1.2	1.14472
	1.12583	0	0	4	1.12583	0	0	4.1	1.12583	0	0	4.2	1.14475	0	0	3	1.14475	0	0	3.1	1.14475	0	0	3.2	1.13786	0	0	2	1.13786	0	0	2.1	1.13786	0	0	2.2	1.14545	0	0	1	1.14545	0	0	1.1	1.14545	0	0	1.2	1.14621
	1.12704	0	0	4	1.12704	0	0	4.1	1.12704	0	0	4.2	1.14595	0	0	3	1.14595	0	0	3.1	1.14595	0	0	3.2	1.13907	0	0	2	1.13907	0	0	2.1	1.13907	0	0	2.2	1.14666	0	0	1	1.14666	0	0	1.1	1.14666	0	0	1.2	1.14741
	1.13155	0	0	4	1.13155	0	0	4.1	1.13155	0	0	4.2	1.15046	0	0	3	1.15046	0	0	3.1	1.15046	0	0	3.2	1.14358	0	0	2	1.14358	0	0	2.1	1.14358	0	0	2.2	1.15116	0	0	1	1.15116	0	0	1.1	1.15116	0	0	1.2	1.15192
	1.13303	0	0	4	1.13303	0	0	4.1	1.13303	0	0	4.2	1.15195	0	0	3	1.15195	0	0	3.1	1.15195	0	0	3.2	1.14506	0	0	2	1.14506	0	0	2.1	1.14506	0	0	2.2	1.15265	0	0	1	1.15265	0	0	1.1	1.15265	0	0	1.2	1.15341
	1.13454	0	0	4	1.13454	0	0	4.1	1.13454	0	0	4.2	1.15343	0	0	3	1.15343	0	0	3.1	1.15343	0	0	3.2	1.14655	0	0	2	1.14655	0	0	2.1	1.14655	0	0	2.2	1.15414	0	0	1	1.15414	0	0	1.1	1.15414	0	0	1.2	1.1549
	1.13574	0	0	4	1.13574	0	0	4.1	1.13574	0	0	4.2	1.15464	0	0	3	1.15464	0	0	3.1	1.15464	0	0	3.2	1.14775	0	0	2	1.14775	0	0	2.1	1.14775	0	0	2.2	1.15534	0	0	1	1.15534	0	0	1.1	1.15534	0	0	1.2	1.1561
	1.14025	0	0	4	1.14025	0	0	4.1	1.14025	0	0	4.2	1.15915	0	0	3	1.15915	0	0	3.1	1.15915	0	0	3.2	1.15226	0	0	2	1.15226	0	0	2.1	1.15226	0	0	2.2	1.15985	0	0	1	1.15985	0	0	1.1	1.15985	0	0	1.2	1.16061
	1.14174	0	0	4	1.14174	0	0	4.1	1.14174	0	0	4.2	1.16063	0	0	3	1.16063	0	0	3.1	1.16063	0	0	3.2	1.15375	0	0	2	1.15375	0	0	2.1	1.15375	0	0	2.2	1.16134	0	0	1	1.16134	0	0	1.1	1.16134	0	0	1.2	1.1621
	1.14322	0	0	4	1.14322	0	0	4.1	1.14322	0	0	4.2	1.16212	0	0	3	1.16212	0	0	3.1	1.16212	0	0	3.2	1.15523	0	0	2	1.15523	0	0	2.1	1.15523	0	0	2.2	1.16282	0	0	1	1.16282	0	0	1.1	1.16282	0	0	1.2	1.16358
	1.14443	0	0	4	1.14443	0	0	4.1	1.14443	0	0	4.2	1.16332	0	0	3	1.16332	0	0	3.1	1.16332	0	0	3.2	1.15644	0	0	2	1.15644	0	0	2.1	1.15644	0	0	2.2	1.16403	0	0	1	1.16403	0	0	1.1	1.16403	0	0	1.2	1.16479
	1.14894	0	0	4	1.14894	0	0	4.1	1.14894	0	0	4.2	1.16783	0	0	3	1.16783	0	0	3.1	1.16783	0	0	3.2	1.16095	0	0	2	1.16095	0	0	2.1	1.16095	0	0	2.2	1.16854	0	0	1	1.16854	0	0	1.1	1.16854	0	0	1.2	1.1693
	1.15042	0	0	4	1.15042	0	0	4.1	1.15042	0	0	4.2	1.16932	0	0	3	1.16932	0	0	3.1	1.16932	0	0	3.2	1.16244	0	0	2	1.16244	0	0	2.1	1.16244	0	0	2.2	1.17002	0	0	1	1.17002	0	0	1.1	1.17002	0	0	1.2	1.17078
	1.15191	0	0	4	1.15191	0	0	4.1	1.15191	0	0	4.2	1.1708	0	0	3	1.1708	0	0	3.1	1.1708	0	0	3.2	1.16393	0	0	2	1.16393	0	0	2.1	1.16393	0	0	2.2	1.17151	0	0	1	1.17151	0	0	1.1	1.17151	0	0	1.2	1.17227
	1.15311	0	0	4	1.15311	0	0	4.1	1.15311	0	0	4.2	1.17201	0	0	3	1.17201	0	0	3.1	1.17201	0	0	3.2	1.16513	0	0	2	1.16513	0	0	2.1	1.16513	0	0	2.2	1.17271	0	0	1	1.17271	0	0	1.1	1.17271	0	0	1.2	1.17347
	1.15762	0	0	4	1.15762	0	0	4.1	1.15762	0	0	4.2	1.17662	0	0	3	1.17662	0	0	3.1	1.17662	0	0	3.2	1.16964	0	0	2	1.16964	0	0	2.1	1.16964	0	0	2.2	1.17933	0	0	1	1.17933	0	0	1.1	1.17933	0	0	1.2	1.17809
	1.15911	0	0	4	1.15911	0	0	4.1	1.15911	0	0	4.2	1.17811	0	0	3	1.17811	0	0	3.1	1.17811	0	0	3.2	1.17113	0	0	2	1.17113	0	0	2.1	1.17113	0	0	2.2	1.18082	0	0	1	1.18082	0	0	1.1	1.18082	0	0	1.2	1.17957
	1.16059	0	0	4	1.16059	0	0	4.1	1.16059	0	0	4.2	1.17959	0	0	3	1.17959	0	0	3.1	1.17959	0	0	3.2	1.17262	0	0	2	1.17262	0	0	2.1	1.17262	0	0	2.2	1.18231	0	0	1	1.18231	0	0	1.1	1.18231	0	0	1.2	1.18106
	1.1618	0	0	4	1.1618	0	0	4.1	1.1618	0	0	4.2	1.1808	0	0	3	1.1808	0	0	3.1	1.1808	0	0	3.2	1.17382	0	0	2	1.17382	0	0	2.1	1.17382	0	0	2.2	1.18351	0	0	1	1.18351	0	0	1.1	1.18351	0	0	1.2	1.18226
	1.16631	0	0	4	1.16631	0	0	4.1	1.16631	0	0	4.2	1.18531	0	0	3	1.18531	0	0	3.1	1.18531	0	0	3.2	1.17844	0	0	2	1.17844	0	0	2.1	1.17844	0	0	2.2	1.18802	0	0	1	1.18802	0	0	1.1	1.18802	0	0	1.2	1.18677
	1.16779	0	0	4	1.16779	0	0	4.1	1.16779	0	0	4.2	1.18679	0	0	3	1.18679	0	0	3.1	1.18679	0	0	3.2	1.17993	0	0	2	1.17993	0	0	2.1	1.17993	0	0	2.2	1.18951	0	0	1	1.18951	0	0	1.1	1.18951	0	0	1.2	1.18826
	1.16928	0	0	4	1.16928	0	0	4.1	1.16928	0	0	4.2	1.18828	0	0	3	1.18828	0	0	3.1	1.18828	0	0	3.2	1.18141	0	0	2	1.18141	0	0	2.1	1.18141	0	0	2.2	1.19091	0	0	1	1.19091	0	0	1.1	1.19091	0	0	1.2	1.18974
	1.17048	0	0	4	1.17048	0	0	4.1	1.17048	0	0	4.2	1.18948	0	0	3	1.18948	0	0	3.1	1.18948	0	0	3.2	1.18262	0	0	2	1.18262	0	0	2.1	1.18262	0	0	2.2	1.19211	0	0	1	1.19211	0	0	1.1	1.19211	0	0	1.2	1.19095
	1.17499	0	0	4	1.17499	0	0	4.1	1.17499	0	0	4.2	1.19399	0	0	3	1.19399	0	0	3.1	1.19399	0	0	3.2	1.18713	0	0	2	1.18713	0	0	2.1	1.18713	0	0	2.2	1.19662	0	0	1	1.19662	0	0	1.1	1.19662	0	0	1.2	1.19546
	1.17648	0	0	4	1.17648	0	0	4.1	1.17648	0	0	4.2	1.19548	0	0	3	1.19548	0	0	3.1	1.19548	0	0	3.2	1.18862	0	0	2	1.18862	0	0	2.1	1.18862	0	0	2.2	1.19811	0	0	1	1.19811	0	0	1.1	1.19811	0	0	1.2	1.19694
	1.17797	0	0	4	1.17797	0	0	4.1	1.17797	0	0	4.2	1.19696	0	0	3	1.19696	0	0	3.1	1.19696	0	0	3.2	1.1901	0	0	2	1.1901	0	0	2.1	1.1901	0	0	2.2	1.1996	0	0	1	1.1996	0	0	1.1	1.1996	0	0	1.2	1.19843
	1.17917	0	0	4	1.17917	0	0	4.1	1.17917	0	0	4.2	1.19817	0	0	3	1.19817	0	0	3.1	1.19817	0	0	3.2	1.19131	0	0	2	1.19131	0	0	2.1	1.19131	0	0	2.2	1.2008	0	0	1	1.2008	0	0	1.1	1.2008	0	0	1.2	1.19963
	1.18379	0	0	4	1.18379	0	0	4.1	1.18379	0	0	4.2	1.20268	0	0	3	1.20268	0	0	3.1	1.20268	0	0	3.2	1.19582	0	0	2	1.19582	0	0	2.1	1.19582	0	0	2.2	1.20531	0	0	1	1.20531	0	0	1.1	1.20531	0	0	1.2	1.20414
	1.18528	0	0	4	1.18528	0	0	4.1	1.18528	0	0	4.2	1.20417	0	0	3	1.20417	0	0	3.1	1.20417	0	0	3.2	1.1973	0	0	2	1.1973	0	0	2.1	1.1973	0	0	2.2	1.2068	0	0	1	1.2068	0	0	1.1	1.2068	0	0	1.2	1.20563
	1.18676	0	0	4	1.18676	0	0	4.1	1.18676	0	0	4.2	1.20565	0	0	3	1.20565	0	0	3.1	1.20565	0	0	3.2	1.19879	0	0	2	1.19879	0	0	2.1	1.19879	0	0	2.2	1.20828	0	0	1	1.20828	0	0	1.1	1.20828	0	0	1.2	1.20711
	1.18797	0	0	4	1.18797	0	0	4.1	1.18797	0	0	4.2	1.20686	0	0	3	1.20686	0	0	3.1	1.20686	0	0	3.2	1.2	0	0	2	1.2	0	0	2.1	1.2	0	0	2.2	1.20949	0	0	1	1.20949	0	0	1.1	1.20949	0	0	1.2	1.20832
	1.19248	0	0	4	1.19248	0	0	4.1	1.19248	0	0	4.2	1.21136	0	0	3	1.21136	0	0	3.1	1.21136	0	0	3.2	1.20451	0	0	2	1.20451	0	0	2.1	1.20451	0	0	2.2	1.214	0	0	1	1.214	0	0	1.1	1.214	0	0	1.2	1.21283
	1.19396	0	0	4	1.19396	0	0	4.1	1.19396	0	0	4.2	1.21285	0	0	3	1.21285	0	0	3.1	1.21285	0	0	3.2	1.20599	0	0	2	1.20599	0	0	2.1	1.20599	0	0	2.2	1.21548	0	0	1	1.21548	0	0	1.1	1.21548	0	0	1.2	1.21431
	1.19545	0	0	4	1.19545	0	0	4.1	1.19545	0	0	4.2	1.21434	0	0	3	1.21434	0	0	3.1	1.21434	0	0	3.2	1.20748	0	0	2	1.20748	0	0	2.1	1.20748	0	0	2.2	1.21697	0	0	1	1.21697	0	0	1.1	1.21697	0	0	1.2	1.2158
	1.19665	0	0	4	1.19665	0	0	4.1	1.19665	0	0	4.2	1.21554	0	0	3	1.21554	0	0	3.1	1.21554	0	0	3.2	1.20868	0	0	2	1.20868	0	0	2.1	1.20868	0	0	2.2	1.21818	0	0	1	1.21818	0	0	1.1	1.21818	0	0	1.2	1.217
	1.20116	0	0	4	1.20116	0	0	4.1	1.20116	0	0	4.2	1.22005	0	0	3	1.22005	0	0	3.1	1.22005	0	0	3.2	1.21319	0	0	2	1.21319	0	0	2.1	1.21319	0	0	2.2	1.22268	0	0	1	1.22268	0	0	1.1	1.22268	0	0	1.2	1.22151
	1.20265	0	0	4	1.20265	0	0	4.1	1.20265	0	0	4.2	1.22154	0	0	3	1.22154	0	0	3.1	1.22154	0	0	3.2	1.21468	0	0	2	1.21468	0	0	2.1	1.21468	0	0	2.2	1.22417	0	0	1	1.22417	0	0	1.1	1.22417	0	0	1.2	1.223
	1.20414	0	0	4	1.20414	0	0	4.1	1.20414	0	0	4.2	1.22302	0	0	3	1.22302	0	0	3.1	1.22302	0	0	3.2	1.21616	0	0	2	1.21616	0	0	2.1	1.21616	0	0	2.2	1.22566	0	0	1	1.22566	0	0	1.1	1.22566	0	0	1.2	1.22448
	1.20534	0	0	4	1.20534	0	0	4.1	1.20534	0	0	4.2	1.22423	0	0	3	1.22423	0	0	3.1	1.22423	0	0	3.2	1.21737	0	0	2	1.21737	0	0	2.1	1.21737	0	0	2.2	1.22686	0	0	1	1.22686	0	0	1.1	1.22686	0	0	1.2	1.22569
	1.20985	0	0	4	1.20985	0	0	4.1	1.20985	0	0	4.2	1.22874	0	0	3	1.22874	0	0	3.1	1.22874	0	0	3.2	1.22188	0	0	2	1.22188	0	0	2.1	1.22188	0	0	2.2	1.23137	0	0	1	1.23137	0	0	1.1	1.23137	0	0	1.2	1.23029
	1.21134	0	0	4	1.21134	0	0	4.1	1.21134	0	0	4.2	1.23022	0	0	3	1.23022	0	0	3.1	1.23022	0	0	3.2	1.22325	0	0	2	1.22325	0	0	2.1	1.22325	0	0	2.2	1.23286	0	0	1	1.23286	0	0	1.1	1.23286	0	0	1.2	1.23178
	1.21283	0	0	4	1.21283	0	0	4.1	1.21283	0	0	4.2	1.23171	0	0	3	1.23171	0	0	3.1	1.23171	0	0	3.2	1.22474	0	0	2	1.22474	0	0	2.1	1.22474	0	0	2.2	1.23435	0	0	1	1.23435	0	0	1.1	1.23435	0	0	1.2	1.23326
	1.21403	0	0	4	1.21403	0	0	4.1	1.21403	0	0	4.2	1.23291	0	0	3	1.23291	0	0	3.1	1.23291	0	0	3.2	1.22594	0	0	2	1.22594	0	0	2.1	1.22594	0	0	2.2	1.23555	0	0	1	1.23555	0	0	1.1	1.23555	0	0	1.2	1.23526
	1.21854	0	0	4	1.21854	0	0	4.1	1.21854	0	0	4.2	1.23743	0	0	3	1.23743	0	0	3.1	1.23743	0	0	3.2	1.23045	0	0	2	1.23045	0	0	2.1	1.23045	0	0	2.2	1.24006	0	0	1	1.24006	0	0	1.1	1.24006	0	0	1.2	1.24
	1.21998	0	0	4	1.21998	0	0	4.1	1.21998	0	0	4.2	1.23891	0	0	3	1.23891	0	0	3.1	1.23891	0	0	3.2	1.23194	0	0	2	1.23194	0	0	2.1	1.23194	0	0	2.2	1.24155	0	0	1	1.24155	0	0	1.1	1.24155	0	0	1.2	1.24149
	1.22146	0	0	4	1.22146	0	0	4.1	1.22146	0	0	4.2	1.2404	0	0	3	1.2404	0	0	3.1	1.2404	0	0	3.2	1.23343	0	0	2	1.23343	0	0	2.1	1.23343	0	0	2.2	1.24305	0	0	1	1.24305	0	0	1.1	1.24305	0	0	1.2	1.24297
	1.22267	0	0	4	1.22267	0	0	4.1	1.22267	0	0	4.2	1.2416	0	0	3	1.2416	0	0	3.1	1.2416	0	0	3.2	1.23463	0	0	2	1.23463	0	0	2.1	1.23463	0	0	2.2	1.24509	0	0	1	1.24509	0	0	1.1	1.24509	0	0	1.2	1.24497
	1.22718	0	0	4	1.22718	0	0	4.1	1.22718	0	0	4.2	1.24611	0	0	3	1.24611	0	0	3.1	1.24611	0	0	3.2	1.23914	0	0	2	1.23914	0	0	2.1	1.23914	0	0	2.2	1.2496	0	0	1	1.2496	0	0	1.1	1.2496	0	0	1.2	1.24947
	1.22866	0	0	4	1.22866	0	0	4.1	1.22866	0	0	4.2	1.2476	0	0	3	1.2476	0	0	3.1	1.2476	0	0	3.2	1.24063	0	0	2	1.24063	0	0	2.1	1.24063	0	0	2.2	1.25109	0	0	1	1.25109	0	0	1.1	1.25109	0	0	1.2	1.25096
	1.23015	0	0	4	1.23015	0	0	4.1	1.23015	0	0	4.2	1.24908	0	0	3	1.24908	0	0	3.1	1.24908	0	0	3.2	1.24211	0	0	2	1.24211	0	0	2.1	1.24211	0	0	2.2	1.25257	0	0	1	1.25257	0	0	1.1	1.25257	0	0	1.2	1.25245
	1.23135	0	0	4	1.23135	0	0	4.1	1.23135	0	0	4.2	1.25029	0	0	3	1.25029	0	0	3.1	1.25029	0	0	3.2	1.24332	0	0	2	1.24332	0	0	2.1	1.24332	0	0	2.2	1.2546	0	0	1	1.2546	0	0	1.1	1.2546	0	0	1.2	1.25365
	1.23587	0	0	4	1.23587	0	0	4.1	1.23587	0	0	4.2	1.2548	0	0	3	1.2548	0	0	3.1	1.2548	0	0	3.2	1.24783	0	0	2	1.24783	0	0	2.1	1.24783	0	0	2.2	1.25911	0	0	1	1.25911	0	0	1.1	1.25911	0	0	1.2	1.25816
	1.23735	0	0	4	1.23735	0	0	4.1	1.23735	0	0	4.2	1.25628	0	0	3	1.25628	0	0	3.1	1.25628	0	0	3.2	1.24931	0	0	2	1.24931	0	0	2.1	1.24931	0	0	2.2	1.26059	0	0	1	1.26059	0	0	1.1	1.26059	0	0	1.2	1.25965
	1.23884	0	0	4	1.23884	0	0	4.1	1.23884	0	0	4.2	1.25777	0	0	3	1.25777	0	0	3.1	1.25777	0	0	3.2	1.2508	0	0	2	1.2508	0	0	2.1	1.2508	0	0	2.2	1.26208	0	0	1	1.26208	0	0	1.1	1.26208	0	0	1.2	1.26113
	1.24004	0	0	4	1.24004	0	0	4.1	1.24004	0	0	4.2	1.25897	0	0	3	1.25897	0	0	3.1	1.25897	0	0	3.2	1.252	0	0	2	1.252	0	0	2.1	1.252	0	0	2.2	1.26328	0	0	1	1.26328	0	0	1.1	1.26328	0	0	1.2	1.26234
	1.24455	0	0	4	1.24455	0	0	4.1	1.24455	0	0	4.2	1.26348	0	0	3	1.26348	0	0	3.1	1.26348	0	0	3.2	1.25652	0	0	2	1.25652	0	0	2.1	1.25652	0	0	2.2	1.26779	0	0	1	1.26779	0	0	1.1	1.26779	0	0	1.2	1.26685
	1.24604	0	0	4	1.24604	0	0	4.1	1.24604	0	0	4.2	1.26497	0	0	3	1.26497	0	0	3.1	1.26497	0	0	3.2	1.258	0	0	2	1.258	0	0	2.1	1.258	0	0	2.2	1.26928	0	0	1	1.26928	0	0	1.1	1.26928	0	0	1.2	1.26833
	1.24753	0	0	4	1.24753	0	0	4.1	1.24753	0	0	4.2	1.26646	0	0	3	1.26646	0	0	3.1	1.26646	0	0	3.2	1.25949	0	0	2	1.25949	0	0	2.1	1.25949	0	0	2.2	1.27076	0	0	1	1.27076	0	0	1.1	1.27076	0	0	1.2	1.26982
	1.24873	0	0	4	1.24873	0	0	4.1	1.24873	0	0	4.2	1.26766	0	0	3	1.26766	0	0	3.1	1.26766	0	0	3.2	1.26069	0	0	2	1.26069	0	0	2.1	1.26069	0	0	2.2	1.27197	0	0	1	1.27197	0	0	1.1	1.27197	0	0	1.2	1.27102
	1.25324	0	0	4	1.25324	0	0	4.1	1.25324	0	0	4.2	1.27217	0	0	3	1.27217	0	0	3.1	1.27217	0	0	3.2	1.2652	0	0	2	1.2652	0	0	2.1	1.2652	0	0	2.2	1.27648	0	0	1	1.27648	0	0	1.1	1.27648	0	0	1.2	1.27553
	1.25472	0	0	4	1.25472	0	0	4.1	1.25472	0	0	4.2	1.27366	0	0	3	1.27366	0	0	3.1	1.27366	0	0	3.2	1.26646	0	0	2	1.26646	0	0	2.1	1.26646	0	0	2.2	1.27796	0	0	1	1.27796	0	0	1.1	1.27796	0	0	1.2	1.27702
	1.25621	0	0	4	1.25621	0	0	4.1	1.25621	0	0	4.2	1.27514	0	0	3	1.27514	0	0	3.1	1.27514	0	0	3.2	1.26794	0	0	2	1.26794	0	0	2.1	1.26794	0	0	2.2	1.27945	0	0	1	1.27945	0	0	1.1	1.27945	0	0	1.2	1.2785
	1.25742	0	0	4	1.25742	0	0	4.1	1.25742	0	0	4.2	1.27635	0	0	3	1.27635	0	0	3.1	1.27635	0	0	3.2	1.26915	0	0	2	1.26915	0	0	2.1	1.26915	0	0	2.2	1.28065	0	0	1	1.28065	0	0	1.1	1.28065	0	0	1.2	1.27971
	1.26192	0	0	4	1.26192	0	0	4.1	1.26192	0	0	4.2	1.28086	0	0	3	1.28086	0	0	3.1	1.28086	0	0	3.2	1.27366	0	0	2	1.27366	0	0	2.1	1.27366	0	0	2.2	1.28516	0	0	1	1.28516	0	0	1.1	1.28516	0	0	1.2	1.28422
	1.26341	0	0	4	1.26341	0	0	4.1	1.26341	0	0	4.2	1.28234	0	0	3	1.28234	0	0	3.1	1.28234	0	0	3.2	1.27515	0	0	2	1.27515	0	0	2.1	1.27515	0	0	2.2	1.28665	0	0	1	1.28665	0	0	1.1	1.28665	0	0	1.2	1.2857
	1.2649	0	0	4	1.2649	0	0	4.1	1.2649	0	0	4.2	1.28383	0	0	3	1.28383	0	0	3.1	1.28383	0	0	3.2	1.27664	0	0	2	1.27664	0	0	2.1	1.27664	0	0	2.2	1.28813	0	0	1	1.28813	0	0	1.1	1.28813	0	0	1.2	1.28719
	1.2661	0	0	4	1.2661	0	0	4.1	1.2661	0	0	4.2	1.28503	0	0	3	1.28503	0	0	3.1	1.28503	0	0	3.2	1.27784	0	0	2	1.27784	0	0	2.1	1.27784	0	0	2.2	1.28934	0	0	1	1.28934	0	0	1.1	1.28934	0	0	1.2	1.2884
	1.27061	0	0	4	1.27061	0	0	4.1	1.27061	0	0	4.2	1.28954	0	0	3	1.28954	0	0	3.1	1.28954	0	0	3.2	1.28235	0	0	2	1.28235	0	0	2.1	1.28235	0	0	2.2	1.29385	0	0	1	1.29385	0	0	1.1	1.29385	0	0	1.2	1.2929
	1.2721	0	0	4	1.2721	0	0	4.1	1.2721	0	0	4.2	1.29103	0	0	3	1.29103	0	0	3.1	1.29103	0	0	3.2	1.28384	0	0	2	1.28384	0	0	2.1	1.28384	0	0	2.2	1.29534	0	0	1	1.29534	0	0	1.1	1.29534	0	0	1.2	1.29416
	1.27358	0	0	4	1.27358	0	0	4.1	1.27358	0	0	4.2	1.29252	0	0	3	1.29252	0	0	3.1	1.29252	0	0	3.2	1.28532	0	0	2	1.28532	0	0	2.1	1.28532	0	0	2.2	1.29682	0	0	1	1.29682	0	0	1.1	1.29682	0	0	1.2	1.29565
	1.27479	0	0	4	1.27479	0	0	4.1	1.27479	0	0	4.2	1.29373	0	0	3	1.29373	0	0	3.1	1.29373	0	0	3.2	1.28653	0	0	2	1.28653	0	0	2.1	1.28653	0	0	2.2	1.29803	0	0	1	1.29803	0	0	1.1	1.29803	0	0	1.2	1.29685
	1.2793	0	0	4	1.2793	0	0	4.1	1.2793	0	0	4.2	1.29824	0	0	3	1.29824	0	0	3.1	1.29824	0	0	3.2	1.29104	0	0	2	1.29104	0	0	2.1	1.29104	0	0	2.2	1.30253	0	0	1	1.30253	0	0	1.1	1.30253	0	0	1.2	1.30136
	1.28078	0	0	4	1.28078	0	0	4.1	1.28078	0	0	4.2	1.29972	0	0	3	1.29972	0	0	3.1	1.29972	0	0	3.2	1.29252	0	0	2	1.29252	0	0	2.1	1.29252	0	0	2.2	1.30402	0	0	1	1.30402	0	0	1.1	1.30402	0	0	1.2	1.30269
	1.28227	0	0	4	1.28227	0	0	4.1	1.28227	0	0	4.2	1.30122	0	0	3	1.30122	0	0	3.1	1.30122	0	0	3.2	1.29401	0	0	2	1.29401	0	0	2.1	1.29401	0	0	2.2	1.30551	0	0	1	1.30551	0	0	1.1	1.30551	0	0	1.2	1.30417
	1.28347	0	0	4	1.28347	0	0	4.1	1.28347	0	0	4.2	1.30243	0	0	3	1.30243	0	0	3.1	1.30243	0	0	3.2	1.29522	0	0	2	1.29522	0	0	2.1	1.29522	0	0	2.2	1.30671	0	0	1	1.30671	0	0	1.1	1.30671	0	0	1.2	1.30538
	1.28798	0	0	4	1.28798	0	0	4.1	1.28798	0	0	4.2	1.30694	0	0	3	1.30694	0	0	3.1	1.30694	0	0	3.2	1.29972	0	0	2	1.29972	0	0	2.1	1.29972	0	0	2.2	1.31122	0	0	1	1.31122	0	0	1.1	1.31122	0	0	1.2	1.30989
	1.28947	0	0	4	1.28947	0	0	4.1	1.28947	0	0	4.2	1.30842	0	0	3	1.30842	0	0	3.1	1.30842	0	0	3.2	1.30119	0	0	2	1.30119	0	0	2.1	1.30119	0	0	2.2	1.31271	0	0	1	1.31271	0	0	1.1	1.31271	0	0	1.2	1.31137
	1.29095	0	0	4	1.29095	0	0	4.1	1.29095	0	0	4.2	1.30991	0	0	3	1.30991	0	0	3.1	1.30991	0	0	3.2	1.30268	0	0	2	1.30268	0	0	2.1	1.30268	0	0	2.2	1.31419	0	0	1	1.31419	0	0	1.1	1.31419	0	0	1.2	1.31286
	1.29216	0	0	4	1.29216	0	0	4.1	1.29216	0	0	4.2	1.31111	0	0	3	1.31111	0	0	3.1	1.31111	0	0	3.2	1.30388	0	0	2	1.30388	0	0	2.1	1.30388	0	0	2.2	1.3154	0	0	1	1.3154	0	0	1.1	1.3154	0	0	1.2	1.31407
	1.29667	0	0	4	1.29667	0	0	4.1	1.29667	0	0	4.2	1.31585	0	0	3	1.31585	0	0	3.1	1.31585	0	0	3.2	1.30839	0	0	2	1.30839	0	0	2.1	1.30839	0	0	2.2	1.31991	0	0	1	1.31991	0	0	1.1	1.31991	0	0	1.2	1.31858
	1.29815	0	0	4	1.29815	0	0	4.1	1.29815	0	0	4.2	1.31734	0	0	3	1.31734	0	0	3.1	1.31734	0	0	3.2	1.30988	0	0	2	1.30988	0	0	2.1	1.30988	0	0	2.2	1.32139	0	0	1	1.32139	0	0	1.1	1.32139	0	0	1.2	1.32006
	1.29964	0	0	4	1.29964	0	0	4.1	1.29964	0	0	4.2	1.31882	0	0	3	1.31882	0	0	3.1	1.31882	0	0	3.2	1.31134	0	0	2	1.31134	0	0	2.1	1.31134	0	0	2.2	1.32288	0	0	1	1.32288	0	0	1.1	1.32288	0	0	1.2	1.32155
	1.30085	0	0	4	1.30085	0	0	4.1	1.30085	0	0	4.2	1.32084	0	0	3	1.32084	0	0	3.1	1.32084	0	0	3.2	1.31255	0	0	2	1.31255	0	0	2.1	1.31255	0	0	2.2	1.32409	0	0	1	1.32409	0	0	1.1	1.32409	0	0	1.2	1.32275
	1.30535	0	0	4	1.30535	0	0	4.1	1.30535	0	0	4.2	1.32535	0	0	3	1.32535	0	0	3.1	1.32535	0	0	3.2	1.31705	0	0	2	1.31705	0	0	2.1	1.31705	0	0	2.2	1.32859	0	0	1	1.32859	0	0	1.1	1.32859	0	0	1.2	1.32726
	1.30684	0	0	4	1.30684	0	0	4.1	1.30684	0	0	4.2	1.32684	0	0	3	1.32684	0	0	3.1	1.32684	0	0	3.2	1.31854	0	0	2	1.31854	0	0	2.1	1.31854	0	0	2.2	1.33008	0	0	1	1.33008	0	0	1.1	1.33008	0	0	1.2	1.32875
	1.30833	0	0	4	1.30833	0	0	4.1	1.30833	0	0	4.2	1.32832	0	0	3	1.32832	0	0	3.1	1.32832	0	0	3.2	1.32003	0	0	2	1.32003	0	0	2.1	1.32003	0	0	2.2	1.33156	0	0	1	1.33156	0	0	1.1	1.33156	0	0	1.2	1.33023
	1.30953	0	0	4	1.30953	0	0	4.1	1.30953	0	0	4.2	1.32953	0	0	3	1.32953	0	0	3.1	1.32953	0	0	3.2	1.32123	0	0	2	1.32123	0	0	2.1	1.32123	0	0	2.2	1.33277	0	0	1	1.33277	0	0	1.1	1.33277	0	0	1.2	1.33144
	1.31404	0	0	4	1.31404	0	0	4.1	1.31404	0	0	4.2	1.33404	0	0	3	1.33404	0	0	3.1	1.33404	0	0	3.2	1.32574	0	0	2	1.32574	0	0	2.1	1.32574	0	0	2.2	1.33728	0	0	1	1.33728	0	0	1.1	1.33728	0	0	1.2	1.33595
	1.31553	0	0	4	1.31553	0	0	4.1	1.31553	0	0	4.2	1.33552	0	0	3	1.33552	0	0	3.1	1.33552	0	0	3.2	1.32723	0	0	2	1.32723	0	0	2.1	1.32723	0	0	2.2	1.33877	0	0	1	1.33877	0	0	1.1	1.33877	0	0	1.2	1.33743
	1.31702	0	0	4	1.31702	0	0	4.1	1.31702	0	0	4.2	1.33701	0	0	3	1.33701	0	0	3.1	1.33701	0	0	3.2	1.32871	0	0	2	1.32871	0	0	2.1	1.32871	0	0	2.2	1.34025	0	0	1	1.34025	0	0	1.1	1.34025	0	0	1.2	1.33892
	1.31822	0	0	4	1.31822	0	0	4.1	1.31822	0	0	4.2	1.33821	0	0	3	1.33821	0	0	3.1	1.33821	0	0	3.2	1.32992	0	0	2	1.32992	0	0	2.1	1.32992	0	0	2.2	1.34146	0	0	1	1.34146	0	0	1.1	1.34146	0	0	1.2	1.34013
	1.32273	0	0	4	1.32273	0	0	4.1	1.32273	0	0	4.2	1.34282	0	0	3	1.34282	0	0	3.1	1.34282	0	0	3.2	1.33442	0	0	2	1.33442	0	0	2.1	1.33442	0	0	2.2	1.34608	0	0	1	1.34608	0	0	1.1	1.34608	0	0	1.2	1.34463
	1.32421	0	0	4	1.32421	0	0	4.1	1.32421	0	0	4.2	1.34431	0	0	3	1.34431	0	0	3.1	1.34431	0	0	3.2	1.33591	0	0	2	1.33591	0	0	2.1	1.33591	0	0	2.2	1.34756	0	0	1	1.34756	0	0	1.1	1.34756	0	0	1.2	1.34612
	1.3257	0	0	4	1.3257	0	0	4.1	1.3257	0	0	4.2	1.34579	0	0	3	1.34579	0	0	3.1	1.34579	0	0	3.2	1.33739	0	0	2	1.33739	0	0	2.1	1.33739	0	0	2.2	1.34905	0	0	1	1.34905	0	0	1.1	1.34905	0	0	1.2	1.3476
	1.32691	0	0	4	1.32691	0	0	4.1	1.32691	0	0	4.2	1.347	0	0	3	1.347	0	0	3.1	1.347	0	0	3.2	1.3386	0	0	2	1.3386	0	0	2.1	1.3386	0	0	2.2	1.35026	0	0	1	1.35026	0	0	1.1	1.35026	0	0	1.2	1.34881
	1.33142	0	0	4	1.33142	0	0	4.1	1.33142	0	0	4.2	1.35151	0	0	3	1.35151	0	0	3.1	1.35151	0	0	3.2	1.34322	0	0	2	1.34322	0	0	2.1	1.34322	0	0	2.2	1.35476	0	0	1	1.35476	0	0	1.1	1.35476	0	0	1.2	1.35332
	1.3329	0	0	4	1.3329	0	0	4.1	1.3329	0	0	4.2	1.35296	0	0	3	1.35296	0	0	3.1	1.35296	0	0	3.2	1.34471	0	0	2	1.34471	0	0	2.1	1.34471	0	0	2.2	1.35607	0	0	1	1.35607	0	0	1.1	1.35607	0	0	1.2	1.3548
	1.33439	0	0	4	1.33439	0	0	4.1	1.33439	0	0	4.2	1.35445	0	0	3	1.35445	0	0	3.1	1.35445	0	0	3.2	1.3462	0	0	2	1.3462	0	0	2.1	1.3462	0	0	2.2	1.35756	0	0	1	1.35756	0	0	1.1	1.35756	0	0	1.2	1.35629
	1.33559	0	0	4	1.33559	0	0	4.1	1.33559	0	0	4.2	1.35565	0	0	3	1.35565	0	0	3.1	1.35565	0	0	3.2	1.3474	0	0	2	1.3474	0	0	2.1	1.3474	0	0	2.2	1.35877	0	0	1	1.35877	0	0	1.1	1.35877	0	0	1.2	1.35749
	1.3401	0	0	4	1.3401	0	0	4.1	1.3401	0	0	4.2	1.36016	0	0	3	1.36016	0	0	3.1	1.36016	0	0	3.2	1.35191	0	0	2	1.35191	0	0	2.1	1.35191	0	0	2.2	1.36328	0	0	1	1.36328	0	0	1.1	1.36328	0	0	1.2	1.362
	1.34159	0	0	4	1.34159	0	0	4.1	1.34159	0	0	4.2	1.36165	0	0	3	1.36165	0	0	3.1	1.36165	0	0	3.2	1.3534	0	0	2	1.3534	0	0	2.1	1.3534	0	0	2.2	1.36476	0	0	1	1.36476	0	0	1.1	1.36476	0	0	1.2	1.36349
	1.34307	0	0	4	1.34307	0	0	4.1	1.34307	0	0	4.2	1.36313	0	0	3	1.36313	0	0	3.1	1.36313	0	0	3.2	1.35488	0	0	2	1.35488	0	0	2.1	1.35488	0	0	2.2	1.36625	0	0	1	1.36625	0	0	1.1	1.36625	0	0	1.2	1.36497
	1.34428	0	0	4	1.34428	0	0	4.1	1.34428	0	0	4.2	1.36434	0	0	3	1.36434	0	0	3.1	1.36434	0	0	3.2	1.35609	0	0	2	1.35609	0	0	2.1	1.35609	0	0	2.2	1.36745	0	0	1	1.36745	0	0	1.1	1.36745	0	0	1.2	1.36618
	1.34879	0	0	4	1.34879	0	0	4.1	1.34879	0	0	4.2	1.36885	0	0	3	1.36885	0	0	3.1	1.36885	0	0	3.2	1.3606	0	0	2	1.3606	0	0	2.1	1.3606	0	0	2.2	1.37196	0	0	1	1.37196	0	0	1.1	1.37196	0	0	1.2	1.37069
	1.35028	0	0	4	1.35028	0	0	4.1	1.35028	0	0	4.2	1.37033	0	0	3	1.37033	0	0	3.1	1.37033	0	0	3.2	1.36208	0	0	2	1.36208	0	0	2.1	1.36208	0	0	2.2	1.37345	0	0	1	1.37345	0	0	1.1	1.37345	0	0	1.2	1.37217
	1.35176	0	0	4	1.35176	0	0	4.1	1.35176	0	0	4.2	1.37182	0	0	3	1.37182	0	0	3.1	1.37182	0	0	3.2	1.36357	0	0	2	1.36357	0	0	2.1	1.36357	0	0	2.2	1.37494	0	0	1	1.37494	0	0	1.1	1.37494	0	0	1.2	1.37366
	1.35297	0	0	4	1.35297	0	0	4.1	1.35297	0	0	4.2	1.37302	0	0	3	1.37302	0	0	3.1	1.37302	0	0	3.2	1.36477	0	0	2	1.36477	0	0	2.1	1.36477	0	0	2.2	1.37614	0	0	1	1.37614	0	0	1.1	1.37614	0	0	1.2	1.37487
	1.35748	0	0	4	1.35748	0	0	4.1	1.35748	0	0	4.2	1.37753	0	0	3	1.37753	0	0	3.1	1.37753	0	0	3.2	1.36928	0	0	2	1.36928	0	0	2.1	1.36928	0	0	2.2	1.38065	0	0	1	1.38065	0	0	1.1	1.38065	0	0	1.2	1.37937
	1.35896	0	0	4	1.35896	0	0	4.1	1.35896	0	0	4.2	1.37902	0	0	3	1.37902	0	0	3.1	1.37902	0	0	3.2	1.37077	0	0	2	1.37077	0	0	2.1	1.37077	0	0	2.2	1.38214	0	0	1	1.38214	0	0	1.1	1.38214	0	0	1.2	1.38086
	1.36045	0	0	4	1.36045	0	0	4.1	1.36045	0	0	4.2	1.38051	0	0	3	1.38051	0	0	3.1	1.38051	0	0	3.2	1.37225	0	0	2	1.37225	0	0	2.1	1.37225	0	0	2.2	1.38362	0	0	1	1.38362	0	0	1.1	1.38362	0	0	1.2	1.38235
	1.36165	0	0	4	1.36165	0	0	4.1	1.36165	0	0	4.2	1.38171	0	0	3	1.38171	0	0	3.1	1.38171	0	0	3.2	1.37425	0	0	2	1.37425	0	0	2.1	1.37425	0	0	2.2	1.38483	0	0	1	1.38483	0	0	1.1	1.38483	0	0	1.2	1.38355
	1.36616	0	0	4	1.36616	0	0	4.1	1.36616	0	0	4.2	1.38622	0	0	3	1.38622	0	0	3.1	1.38622	0	0	3.2	1.37876	0	0	2	1.37876	0	0	2.1	1.37876	0	0	2.2	1.38934	0	0	1	1.38934	0	0	1.1	1.38934	0	0	1.2	1.38806
	1.36765	0	0	4	1.36765	0	0	4.1	1.36765	0	0	4.2	1.38771	0	0	3	1.38771	0	0	3.1	1.38771	0	0	3.2	1.38025	0	0	2	1.38025	0	0	2.1	1.38025	0	0	2.2	1.39082	0	0	1	1.39082	0	0	1.1	1.39082	0	0	1.2	1.38955
	1.36913	0	0	4	1.36913	0	0	4.1	1.36913	0	0	4.2	1.38921	0	0	3	1.38921	0	0	3.1	1.38921	0	0	3.2	1.38173	0	0	2	1.38173	0	0	2.1	1.38173	0	0	2.2	1.39231	0	0	1	1.39231	0	0	1.1	1.39231	0	0	1.2	1.39103
	1.37034	0	0	4	1.37034	0	0	4.1	1.37034	0	0	4.2	1.39042	0	0	3	1.39042	0	0	3.1	1.39042	0	0	3.2	1.38294	0	0	2	1.38294	0	0	2.1	1.38294	0	0	2.2	1.39351	0	0	1	1.39351	0	0	1.1	1.39351	0	0	1.2	1.39302
	1.37485	0	0	4	1.37485	0	0	4.1	1.37485	0	0	4.2	1.39493	0	0	3	1.39493	0	0	3.1	1.39493	0	0	3.2	1.38745	0	0	2	1.38745	0	0	2.1	1.38745	0	0	2.2	1.3981	0	0	1	1.3981	0	0	1.1	1.3981	0	0	1.2	1.39753
	1.37633	0	0	4	1.37633	0	0	4.1	1.37633	0	0	4.2	1.39641	0	0	3	1.39641	0	0	3.1	1.39641	0	0	3.2	1.3887	0	0	2	1.3887	0	0	2.1	1.3887	0	0	2.2	1.39959	0	0	1	1.39959	0	0	1.1	1.39959	0	0	1.2	1.39901
	1.37782	0	0	4	1.37782	0	0	4.1	1.37782	0	0	4.2	1.3979	0	0	3	1.3979	0	0	3.1	1.3979	0	0	3.2	1.39019	0	0	2	1.39019	0	0	2.1	1.39019	0	0	2.2	1.40107	0	0	1	1.40107	0	0	1.1	1.40107	0	0	1.2	1.4005
	1.37903	0	0	4	1.37903	0	0	4.1	1.37903	0	0	4.2	1.3991	0	0	3	1.3991	0	0	3.1	1.3991	0	0	3.2	1.39139	0	0	2	1.39139	0	0	2.1	1.39139	0	0	2.2	1.40309	0	0	1	1.40309	0	0	1.1	1.40309	0	0	1.2	1.40249
	1.38353	0	0	4	1.38353	0	0	4.1	1.38353	0	0	4.2	1.40361	0	0	3	1.40361	0	0	3.1	1.40361	0	0	3.2	1.3959	0	0	2	1.3959	0	0	2.1	1.3959	0	0	2.2	1.4076	0	0	1	1.4076	0	0	1.1	1.4076	0	0	1.2	1.407
	1.38502	0	0	4	1.38502	0	0	4.1	1.38502	0	0	4.2	1.4051	0	0	3	1.4051	0	0	3.1	1.4051	0	0	3.2	1.39739	0	0	2	1.39739	0	0	2.1	1.39739	0	0	2.2	1.40909	0	0	1	1.40909	0	0	1.1	1.40909	0	0	1.2	1.40848
	1.3865	0	0	4	1.3865	0	0	4.1	1.3865	0	0	4.2	1.40658	0	0	3	1.40658	0	0	3.1	1.40658	0	0	3.2	1.39888	0	0	2	1.39888	0	0	2.1	1.39888	0	0	2.2	1.41057	0	0	1	1.41057	0	0	1.1	1.41057	0	0	1.2	1.40997
	1.3877	0	0	4	1.3877	0	0	4.1	1.3877	0	0	4.2	1.40779	0	0	3	1.40779	0	0	3.1	1.40779	0	0	3.2	1.40008	0	0	2	1.40008	0	0	2.1	1.40008	0	0	2.2	1.4126	0	0	1	1.4126	0	0	1.1	1.4126	0	0	1.2	1.41118
	1.39221	0	0	4	1.39221	0	0	4.1	1.39221	0	0	4.2	1.4123	0	0	3	1.4123	0	0	3.1	1.4123	0	0	3.2	1.40459	0	0	2	1.40459	0	0	2.1	1.40459	0	0	2.2	1.41711	0	0	1	1.41711	0	0	1.1	1.41711	0	0	1.2	1.41568
	1.3937	0	0	4	1.3937	0	0	4.1	1.3937	0	0	4.2	1.41378	0	0	3	1.41378	0	0	3.1	1.41378	0	0	3.2	1.40608	0	0	2	1.40608	0	0	2.1	1.40608	0	0	2.2	1.41859	0	0	1	1.41859	0	0	1.1	1.41859	0	0	1.2	1.41717
	1.39519	0	0	4	1.39519	0	0	4.1	1.39519	0	0	4.2	1.41527	0	0	3	1.41527	0	0	3.1	1.41527	0	0	3.2	1.40756	0	0	2	1.40756	0	0	2.1	1.40756	0	0	2.2	1.42008	0	0	1	1.42008	0	0	1.1	1.42008	0	0	1.2	1.41865
	1.39639	0	0	4	1.39639	0	0	4.1	1.39639	0	0	4.2	1.41647	0	0	3	1.41647	0	0	3.1	1.41647	0	0	3.2	1.40877	0	0	2	1.40877	0	0	2.1	1.40877	0	0	2.2	1.42129	0	0	1	1.42129	0	0	1.1	1.42129	0	0	1.2	1.41986
	1.4009	0	0	4	1.4009	0	0	4.1	1.4009	0	0	4.2	1.42098	0	0	3	1.42098	0	0	3.1	1.42098	0	0	3.2	1.41327	0	0	2	1.41327	0	0	2.1	1.41327	0	0	2.2	1.4258	0	0	1	1.4258	0	0	1.1	1.4258	0	0	1.2	1.42437
	1.40239	0	0	4	1.40239	0	0	4.1	1.40239	0	0	4.2	1.42247	0	0	3	1.42247	0	0	3.1	1.42247	0	0	3.2	1.41476	0	0	2	1.41476	0	0	2.1	1.41476	0	0	2.2	1.42728	0	0	1	1.42728	0	0	1.1	1.42728	0	0	1.2	1.42586
	1.40389	0	0	4	1.40389	0	0	4.1	1.40389	0	0	4.2	1.42395	0	0	3	1.42395	0	0	3.1	1.42395	0	0	3.2	1.41624	0	0	2	1.41624	0	0	2.1	1.41624	0	0	2.2	1.42877	0	0	1	1.42877	0	0	1.1	1.42877	0	0	1.2	1.42734
	1.4051	0	0	4	1.4051	0	0	4.1	1.4051	0	0	4.2	1.42516	0	0	3	1.42516	0	0	3.1	1.42516	0	0	3.2	1.41745	0	0	2	1.41745	0	0	2.1	1.41745	0	0	2.2	1.42997	0	0	1	1.42997	0	0	1.1	1.42997	0	0	1.2	1.42855
	1.40961	0	0	4	1.40961	0	0	4.1	1.40961	0	0	4.2	1.43114	0	0	3	1.43114	0	0	3.1	1.43114	0	0	3.2	1.42196	0	0	2	1.42196	0	0	2.1	1.42196	0	0	2.2	1.43448	0	0	1	1.43448	0	0	1.1	1.43448	0	0	1.2	1.43306
	1.41109	0	0	4	1.41109	0	0	4.1	1.41109	0	0	4.2	1.43262	0	0	3	1.43262	0	0	3.1	1.43262	0	0	3.2	1.42345	0	0	2	1.42345	0	0	2.1	1.42345	0	0	2.2	1.43597	0	0	1	1.43597	0	0	1.1	1.43597	0	0	1.2	1.43454
	1.41258	0	0	4	1.41258	0	0	4.1	1.41258	0	0	4.2	1.43411	0	0	3	1.43411	0	0	3.1	1.43411	0	0	3.2	1.42493	0	0	2	1.42493	0	0	2.1	1.42493	0	0	2.2	1.43745	0	0	1	1.43745	0	0	1.1	1.43745	0	0	1.2	1.43603
	1.41378	0	0	4	1.41378	0	0	4.1	1.41378	0	0	4.2	1.43532	0	0	3	1.43532	0	0	3.1	1.43532	0	0	3.2	1.42614	0	0	2	1.42614	0	0	2.1	1.42614	0	0	2.2	1.43866	0	0	1	1.43866	0	0	1.1	1.43866	0	0	1.2	1.43723
	1.41829	0	0	4	1.41829	0	0	4.1	1.41829	0	0	4.2	1.43983	0	0	3	1.43983	0	0	3.1	1.43983	0	0	3.2	1.43065	0	0	2	1.43065	0	0	2.1	1.43065	0	0	2.2	1.44317	0	0	1	1.44317	0	0	1.1	1.44317	0	0	1.2	1.44174
	1.41978	0	0	4	1.41978	0	0	4.1	1.41978	0	0	4.2	1.44131	0	0	3	1.44131	0	0	3.1	1.44131	0	0	3.2	1.43214	0	0	2	1.43214	0	0	2.1	1.43214	0	0	2.2	1.44465	0	0	1	1.44465	0	0	1.1	1.44465	0	0	1.2	1.44323
	1.42127	0	0	4	1.42127	0	0	4.1	1.42127	0	0	4.2	1.4428	0	0	3	1.4428	0	0	3.1	1.4428	0	0	3.2	1.43362	0	0	2	1.43362	0	0	2.1	1.43362	0	0	2.2	1.44614	0	0	1	1.44614	0	0	1.1	1.44614	0	0	1.2	1.44472
	1.42247	0	0	4	1.42247	0	0	4.1	1.42247	0	0	4.2	1.444	0	0	3	1.444	0	0	3.1	1.444	0	0	3.2	1.43483	0	0	2	1.43483	0	0	2.1	1.43483	0	0	2.2	1.44734	0	0	1	1.44734	0	0	1.1	1.44734	0	0	1.2	1.44593
	1.42698	0	0	4	1.42698	0	0	4.1	1.42698	0	0	4.2	1.44851	0	0	3	1.44851	0	0	3.1	1.44851	0	0	3.2	1.43934	0	0	2	1.43934	0	0	2.1	1.43934	0	0	2.2	1.45185	0	0	1	1.45185	0	0	1.1	1.45185	0	0	1.2	1.45043
	1.42847	0	0	4	1.42847	0	0	4.1	1.42847	0	0	4.2	1.45	0	0	3	1.45	0	0	3.1	1.45	0	0	3.2	1.44083	0	0	2	1.44083	0	0	2.1	1.44083	0	0	2.2	1.45334	0	0	1	1.45334	0	0	1.1	1.45334	0	0	1.2	1.45169
	1.42995	0	0	4	1.42995	0	0	4.1	1.42995	0	0	4.2	1.45148	0	0	3	1.45148	0	0	3.1	1.45148	0	0	3.2	1.44231	0	0	2	1.44231	0	0	2.1	1.44231	0	0	2.2	1.45482	0	0	1	1.45482	0	0	1.1	1.45482	0	0	1.2	1.45318
	1.43116	0	0	4	1.43116	0	0	4.1	1.43116	0	0	4.2	1.45269	0	0	3	1.45269	0	0	3.1	1.45269	0	0	3.2	1.44352	0	0	2	1.44352	0	0	2.1	1.44352	0	0	2.2	1.45603	0	0	1	1.45603	0	0	1.1	1.45603	0	0	1.2	1.45438
	1.43567	0	0	4	1.43567	0	0	4.1	1.43567	0	0	4.2	1.4572	0	0	3	1.4572	0	0	3.1	1.4572	0	0	3.2	1.44803	0	0	2	1.44803	0	0	2.1	1.44803	0	0	2.2	1.46054	0	0	1	1.46054	0	0	1.1	1.46054	0	0	1.2	1.45889
	1.43715	0	0	4	1.43715	0	0	4.1	1.43715	0	0	4.2	1.45869	0	0	3	1.45869	0	0	3.1	1.45869	0	0	3.2	1.44951	0	0	2	1.44951	0	0	2.1	1.44951	0	0	2.2	1.46202	0	0	1	1.46202	0	0	1.1	1.46202	0	0	1.2	1.46024
	1.43864	0	0	4	1.43864	0	0	4.1	1.43864	0	0	4.2	1.46017	0	0	3	1.46017	0	0	3.1	1.46017	0	0	3.2	1.45077	0	0	2	1.45077	0	0	2.1	1.45077	0	0	2.2	1.46351	0	0	1	1.46351	0	0	1.1	1.46351	0	0	1.2	1.46173
	1.43984	0	0	4	1.43984	0	0	4.1	1.43984	0	0	4.2	1.46138	0	0	3	1.46138	0	0	3.1	1.46138	0	0	3.2	1.45198	0	0	2	1.45198	0	0	2.1	1.45198	0	0	2.2	1.46472	0	0	1	1.46472	0	0	1.1	1.46472	0	0	1.2	1.46294
	1.44435	0	0	4	1.44435	0	0	4.1	1.44435	0	0	4.2	1.46589	0	0	3	1.46589	0	0	3.1	1.46589	0	0	3.2	1.45648	0	0	2	1.45648	0	0	2.1	1.45648	0	0	2.2	1.46922	0	0	1	1.46922	0	0	1.1	1.46922	0	0	1.2	1.46744
	1.44584	0	0	4	1.44584	0	0	4.1	1.44584	0	0	4.2	1.46737	0	0	3	1.46737	0	0	3.1	1.46737	0	0	3.2	1.45797	0	0	2	1.45797	0	0	2.1	1.45797	0	0	2.2	1.47071	0	0	1	1.47071	0	0	1.1	1.47071	0	0	1.2	1.46893
	1.44733	0	0	4	1.44733	0	0	4.1	1.44733	0	0	4.2	1.46886	0	0	3	1.46886	0	0	3.1	1.46886	0	0	3.2	1.45946	0	0	2	1.45946	0	0	2.1	1.45946	0	0	2.2	1.4722	0	0	1	1.4722	0	0	1.1	1.4722	0	0	1.2	1.47042
	1.44853	0	0	4	1.44853	0	0	4.1	1.44853	0	0	4.2	1.47007	0	0	3	1.47007	0	0	3.1	1.47007	0	0	3.2	1.46066	0	0	2	1.46066	0	0	2.1	1.46066	0	0	2.2	1.4734	0	0	1	1.4734	0	0	1.1	1.4734	0	0	1.2	1.47163
	1.45304	0	0	4	1.45304	0	0	4.1	1.45304	0	0	4.2	1.47458	0	0	3	1.47458	0	0	3.1	1.47458	0	0	3.2	1.46517	0	0	2	1.46517	0	0	2.1	1.46517	0	0	2.2	1.47791	0	0	1	1.47791	0	0	1.1	1.47791	0	0	1.2	1.47613
	1.45455	0	0	4	1.45455	0	0	4.1	1.45455	0	0	4.2	1.47606	0	0	3	1.47606	0	0	3.1	1.47606	0	0	3.2	1.46666	0	0	2	1.46666	0	0	2.1	1.46666	0	0	2.2	1.4794	0	0	1	1.4794	0	0	1.1	1.4794	0	0	1.2	1.47762
	1.45603	0	0	4	1.45603	0	0	4.1	1.45603	0	0	4.2	1.47755	0	0	3	1.47755	0	0	3.1	1.47755	0	0	3.2	1.46815	0	0	2	1.46815	0	0	2.1	1.46815	0	0	2.2	1.48089	0	0	1	1.48089	0	0	1.1	1.48089	0	0	1.2	1.4791
	1.45724	0	0	4	1.45724	0	0	4.1	1.45724	0	0	4.2	1.47875	0	0	3	1.47875	0	0	3.1	1.47875	0	0	3.2	1.46935	0	0	2	1.46935	0	0	2.1	1.46935	0	0	2.2	1.48209	0	0	1	1.48209	0	0	1.1	1.48209	0	0	1.2	1.48031
	1.46175	0	0	4	1.46175	0	0	4.1	1.46175	0	0	4.2	1.48326	0	0	3	1.48326	0	0	3.1	1.48326	0	0	3.2	1.47386	0	0	2	1.47386	0	0	2.1	1.47386	0	0	2.2	1.4866	0	0	1	1.4866	0	0	1.1	1.4866	0	0	1.2	1.48482
	1.46304	0	0	4	1.46304	0	0	4.1	1.46304	0	0	4.2	1.48475	0	0	3	1.48475	0	0	3.1	1.48475	0	0	3.2	1.47535	0	0	2	1.47535	0	0	2.1	1.47535	0	0	2.2	1.48809	0	0	1	1.48809	0	0	1.1	1.48809	0	0	1.2	1.4863
	1.46453	0	0	4	1.46453	0	0	4.1	1.46453	0	0	4.2	1.48623	0	0	3	1.48623	0	0	3.1	1.48623	0	0	3.2	1.47683	0	0	2	1.47683	0	0	2.1	1.47683	0	0	2.2	1.48957	0	0	1	1.48957	0	0	1.1	1.48957	0	0	1.2	1.48779
	1.46574	0	0	4	1.46574	0	0	4.1	1.46574	0	0	4.2	1.48744	0	0	3	1.48744	0	0	3.1	1.48744	0	0	3.2	1.47804	0	0	2	1.47804	0	0	2.1	1.47804	0	0	2.2	1.49078	0	0	1	1.49078	0	0	1.1	1.49078	0	0	1.2	1.48899
	1.47024	0	0	4	1.47024	0	0	4.1	1.47024	0	0	4.2	1.49195	0	0	3	1.49195	0	0	3.1	1.49195	0	0	3.2	1.48254	0	0	2	1.48254	0	0	2.1	1.48254	0	0	2.2	1.49529	0	0	1	1.49529	0	0	1.1	1.49529	0	0	1.2	1.4935
	1.47173	0	0	4	1.47173	0	0	4.1	1.47173	0	0	4.2	1.49343	0	0	3	1.49343	0	0	3.1	1.49343	0	0	3.2	1.48403	0	0	2	1.48403	0	0	2.1	1.48403	0	0	2.2	1.49677	0	0	1	1.49677	0	0	1.1	1.49677	0	0	1.2	1.49499
	1.47323	0	0	4	1.47323	0	0	4.1	1.47323	0	0	4.2	1.49492	0	0	3	1.49492	0	0	3.1	1.49492	0	0	3.2	1.48552	0	0	2	1.48552	0	0	2.1	1.48552	0	0	2.2	1.49826	0	0	1	1.49826	0	0	1.1	1.49826	0	0	1.2	1.49647
	1.47444	0	0	4	1.47444	0	0	4.1	1.47444	0	0	4.2	1.49612	0	0	3	1.49612	0	0	3.1	1.49612	0	0	3.2	1.48672	0	0	2	1.48672	0	0	2.1	1.48672	0	0	2.2	1.49947	0	0	1	1.49947	0	0	1.1	1.49947	0	0	1.2	1.49768
	1.47894	0	0	4	1.47894	0	0	4.1	1.47894	0	0	4.2	1.50063	0	0	3	1.50063	0	0	3.1	1.50063	0	0	3.2	1.49123	0	0	2	1.49123	0	0	2.1	1.49123	0	0	2.2	1.50397	0	0	1	1.50397	0	0	1.1	1.50397	0	0	1.2	1.50219
	1.48043	0	0	4	1.48043	0	0	4.1	1.48043	0	0	4.2	1.50212	0	0	3	1.50212	0	0	3.1	1.50212	0	0	3.2	1.49272	0	0	2	1.49272	0	0	2.1	1.49272	0	0	2.2	1.50544	0	0	1	1.50544	0	0	1.1	1.50544	0	0	1.2	1.50368
	1.48191	0	0	4	1.48191	0	0	4.1	1.48191	0	0	4.2	1.5036	0	0	3	1.5036	0	0	3.1	1.5036	0	0	3.2	1.4942	0	0	2	1.4942	0	0	2.1	1.4942	0	0	2.2	1.50693	0	0	1	1.50693	0	0	1.1	1.50693	0	0	1.2	1.50516
	1.48312	0	0	4	1.48312	0	0	4.1	1.48312	0	0	4.2	1.50481	0	0	3	1.50481	0	0	3.1	1.50481	0	0	3.2	1.49541	0	0	2	1.49541	0	0	2.1	1.49541	0	0	2.2	1.50813	0	0	1	1.50813	0	0	1.1	1.50813	0	0	1.2	1.50637
	1.48763	0	0	4	1.48763	0	0	4.1	1.48763	0	0	4.2	1.50932	0	0	3	1.50932	0	0	3.1	1.50932	0	0	3.2	1.49992	0	0	2	1.49992	0	0	2.1	1.49992	0	0	2.2	1.51276	0	0	1	1.51276	0	0	1.1	1.51276	0	0	1.2	1.51088
	1.48911	0	0	4	1.48911	0	0	4.1	1.48911	0	0	4.2	1.5108	0	0	3	1.5108	0	0	3.1	1.5108	0	0	3.2	1.5014	0	0	2	1.5014	0	0	2.1	1.5014	0	0	2.2	1.51401	0	0	1	1.51401	0	0	1.1	1.51401	0	0	1.2	1.51236
	1.4906	0	0	4	1.4906	0	0	4.1	1.4906	0	0	4.2	1.51229	0	0	3	1.51229	0	0	3.1	1.51229	0	0	3.2	1.50289	0	0	2	1.50289	0	0	2.1	1.50289	0	0	2.2	1.5155	0	0	1	1.5155	0	0	1.1	1.5155	0	0	1.2	1.51385
	1.49181	0	0	4	1.49181	0	0	4.1	1.49181	0	0	4.2	1.51349	0	0	3	1.51349	0	0	3.1	1.51349	0	0	3.2	1.50409	0	0	2	1.50409	0	0	2.1	1.50409	0	0	2.2	1.5167	0	0	1	1.5167	0	0	1.1	1.5167	0	0	1.2	1.51505
	1.49631	0	0	4	1.49631	0	0	4.1	1.49631	0	0	4.2	1.518	0	0	3	1.518	0	0	3.1	1.518	0	0	3.2	1.50871	0	0	2	1.50871	0	0	2.1	1.50871	0	0	2.2	1.52121	0	0	1	1.52121	0	0	1.1	1.52121	0	0	1.2	1.51956
	1.4978	0	0	4	1.4978	0	0	4.1	1.4978	0	0	4.2	1.51949	0	0	3	1.51949	0	0	3.1	1.51949	0	0	3.2	1.5102	0	0	2	1.5102	0	0	2.1	1.5102	0	0	2.2	1.5227	0	0	1	1.5227	0	0	1.1	1.5227	0	0	1.2	1.52105
	1.49929	0	0	4	1.49929	0	0	4.1	1.49929	0	0	4.2	1.52098	0	0	3	1.52098	0	0	3.1	1.52098	0	0	3.2	1.51169	0	0	2	1.51169	0	0	2.1	1.51169	0	0	2.2	1.52419	0	0	1	1.52419	0	0	1.1	1.52419	0	0	1.2	1.52253
	1.50049	0	0	4	1.50049	0	0	4.1	1.50049	0	0	4.2	1.52218	0	0	3	1.52218	0	0	3.1	1.52218	0	0	3.2	1.51289	0	0	2	1.51289	0	0	2.1	1.51289	0	0	2.2	1.52539	0	0	1	1.52539	0	0	1.1	1.52539	0	0	1.2	1.52453
	1.505	0	0	4	1.505	0	0	4.1	1.505	0	0	4.2	1.52669	0	0	3	1.52669	0	0	3.1	1.52669	0	0	3.2	1.5174	0	0	2	1.5174	0	0	2.1	1.5174	0	0	2.2	1.5299	0	0	1	1.5299	0	0	1.1	1.5299	0	0	1.2	1.52904
	1.50649	0	0	4	1.50649	0	0	4.1	1.50649	0	0	4.2	1.52818	0	0	3	1.52818	0	0	3.1	1.52818	0	0	3.2	1.51889	0	0	2	1.51889	0	0	2.1	1.51889	0	0	2.2	1.53139	0	0	1	1.53139	0	0	1.1	1.53139	0	0	1.2	1.53052
	1.50797	0	0	4	1.50797	0	0	4.1	1.50797	0	0	4.2	1.52966	0	0	3	1.52966	0	0	3.1	1.52966	0	0	3.2	1.52037	0	0	2	1.52037	0	0	2.1	1.52037	0	0	2.2	1.53287	0	0	1	1.53287	0	0	1.1	1.53287	0	0	1.2	1.53201
	1.50918	0	0	4	1.50918	0	0	4.1	1.50918	0	0	4.2	1.53087	0	0	3	1.53087	0	0	3.1	1.53087	0	0	3.2	1.52158	0	0	2	1.52158	0	0	2.1	1.52158	0	0	2.2	1.53408	0	0	1	1.53408	0	0	1.1	1.53408	0	0	1.2	1.53321
	1.51369	0	0	4	1.51369	0	0	4.1	1.51369	0	0	4.2	1.53538	0	0	3	1.53538	0	0	3.1	1.53538	0	0	3.2	1.52632	0	0	2	1.52632	0	0	2.1	1.52632	0	0	2.2	1.53859	0	0	1	1.53859	0	0	1.1	1.53859	0	0	1.2	1.53772
	1.51518	0	0	4	1.51518	0	0	4.1	1.51518	0	0	4.2	1.53686	0	0	3	1.53686	0	0	3.1	1.53686	0	0	3.2	1.52782	0	0	2	1.52782	0	0	2.1	1.52782	0	0	2.2	1.54008	0	0	1	1.54008	0	0	1.1	1.54008	0	0	1.2	1.53921
	1.51666	0	0	4	1.51666	0	0	4.1	1.51666	0	0	4.2	1.53835	0	0	3	1.53835	0	0	3.1	1.53835	0	0	3.2	1.52931	0	0	2	1.52931	0	0	2.1	1.52931	0	0	2.2	1.54156	0	0	1	1.54156	0	0	1.1	1.54156	0	0	1.2	1.54069
	1.51787	0	0	4	1.51787	0	0	4.1	1.51787	0	0	4.2	1.53955	0	0	3	1.53955	0	0	3.1	1.53955	0	0	3.2	1.53132	0	0	2	1.53132	0	0	2.1	1.53132	0	0	2.2	1.54277	0	0	1	1.54277	0	0	1.1	1.54277	0	0	1.2	1.5419
	1.52238	0	0	4	1.52238	0	0	4.1	1.52238	0	0	4.2	1.54406	0	0	3	1.54406	0	0	3.1	1.54406	0	0	3.2	1.53583	0	0	2	1.53583	0	0	2.1	1.53583	0	0	2.2	1.54728	0	0	1	1.54728	0	0	1.1	1.54728	0	0	1.2	1.54664
	1.52388	0	0	4	1.52388	0	0	4.1	1.52388	0	0	4.2	1.54555	0	0	3	1.54555	0	0	3.1	1.54555	0	0	3.2	1.53732	0	0	2	1.53732	0	0	2.1	1.53732	0	0	2.2	1.54876	0	0	1	1.54876	0	0	1.1	1.54876	0	0	1.2	1.54812
	1.52536	0	0	4	1.52536	0	0	4.1	1.52536	0	0	4.2	1.54703	0	0	3	1.54703	0	0	3.1	1.54703	0	0	3.2	1.5388	0	0	2	1.5388	0	0	2.1	1.5388	0	0	2.2	1.55025	0	0	1	1.55025	0	0	1.1	1.55025	0	0	1.2	1.54961
	1.52657	0	0	4	1.52657	0	0	4.1	1.52657	0	0	4.2	1.54824	0	0	3	1.54824	0	0	3.1	1.54824	0	0	3.2	1.54001	0	0	2	1.54001	0	0	2.1	1.54001	0	0	2.2	1.55145	0	0	1	1.55145	0	0	1.1	1.55145	0	0	1.2	1.5516
	1.53108	0	0	4	1.53108	0	0	4.1	1.53108	0	0	4.2	1.55275	0	0	3	1.55275	0	0	3.1	1.55275	0	0	3.2	1.54452	0	0	2	1.54452	0	0	2.1	1.54452	0	0	2.2	1.55604	0	0	1	1.55604	0	0	1.1	1.55604	0	0	1.2	1.55611
	1.53256	0	0	4	1.53256	0	0	4.1	1.53256	0	0	4.2	1.55423	0	0	3	1.55423	0	0	3.1	1.55423	0	0	3.2	1.54601	0	0	2	1.54601	0	0	2.1	1.54601	0	0	2.2	1.55752	0	0	1	1.55752	0	0	1.1	1.55752	0	0	1.2	1.5576
	1.53402	0	0	4	1.53402	0	0	4.1	1.53402	0	0	4.2	1.55572	0	0	3	1.55572	0	0	3.1	1.55572	0	0	3.2	1.54749	0	0	2	1.54749	0	0	2.1	1.54749	0	0	2.2	1.55901	0	0	1	1.55901	0	0	1.1	1.55901	0	0	1.2	1.55909
	1.53522	0	0	4	1.53522	0	0	4.1	1.53522	0	0	4.2	1.55693	0	0	3	1.55693	0	0	3.1	1.55693	0	0	3.2	1.5487	0	0	2	1.5487	0	0	2.1	1.5487	0	0	2.2	1.56102	0	0	1	1.56102	0	0	1.1	1.56102	0	0	1.2	1.56029
	1.53973	0	0	4	1.53973	0	0	4.1	1.53973	0	0	4.2	1.56144	0	0	3	1.56144	0	0	3.1	1.56144	0	0	3.2	1.55321	0	0	2	1.55321	0	0	2.1	1.55321	0	0	2.2	1.56576	0	0	1	1.56576	0	0	1.1	1.56576	0	0	1.2	1.5648
	1.54123	0	0	4	1.54123	0	0	4.1	1.54123	0	0	4.2	1.56292	0	0	3	1.56292	0	0	3.1	1.56292	0	0	3.2	1.55469	0	0	2	1.55469	0	0	2.1	1.55469	0	0	2.2	1.56725	0	0	1	1.56725	0	0	1.1	1.56725	0	0	1.2	1.56629
	1.54272	0	0	4	1.54272	0	0	4.1	1.54272	0	0	4.2	1.56441	0	0	3	1.56441	0	0	3.1	1.56441	0	0	3.2	1.55618	0	0	2	1.55618	0	0	2.1	1.55618	0	0	2.2	1.56874	0	0	1	1.56874	0	0	1.1	1.56874	0	0	1.2	1.56777
	1.54392	0	0	4	1.54392	0	0	4.1	1.54392	0	0	4.2	1.56561	0	0	3	1.56561	0	0	3.1	1.56561	0	0	3.2	1.55739	0	0	2	1.55739	0	0	2.1	1.55739	0	0	2.2	1.57074	0	0	1	1.57074	0	0	1.1	1.57074	0	0	1.2	1.56898
	1.54843	0	0	4	1.54843	0	0	4.1	1.54843	0	0	4.2	1.57012	0	0	3	1.57012	0	0	3.1	1.57012	0	0	3.2	1.56189	0	0	2	1.56189	0	0	2.1	1.56189	0	0	2.2	1.57525	0	0	1	1.57525	0	0	1.1	1.57525	0	0	1.2	1.57349
	1.54992	0	0	4	1.54992	0	0	4.1	1.54992	0	0	4.2	1.5716	0	0	3	1.5716	0	0	3.1	1.5716	0	0	3.2	1.56338	0	0	2	1.56338	0	0	2.1	1.56338	0	0	2.2	1.57674	0	0	1	1.57674	0	0	1.1	1.57674	0	0	1.2	1.57497
	1.55135	0	0	4	1.55135	0	0	4.1	1.55135	0	0	4.2	1.57309	0	0	3	1.57309	0	0	3.1	1.57309	0	0	3.2	1.56487	0	0	2	1.56487	0	0	2.1	1.56487	0	0	2.2	1.57823	0	0	1	1.57823	0	0	1.1	1.57823	0	0	1.2	1.57646
	1.55255	0	0	4	1.55255	0	0	4.1	1.55255	0	0	4.2	1.5743	0	0	3	1.5743	0	0	3.1	1.5743	0	0	3.2	1.56607	0	0	2	1.56607	0	0	2.1	1.56607	0	0	2.2	1.57943	0	0	1	1.57943	0	0	1.1	1.57943	0	0	1.2	1.57766
	1.55706	0	0	4	1.55706	0	0	4.1	1.55706	0	0	4.2	1.5788	0	0	3	1.5788	0	0	3.1	1.5788	0	0	3.2	1.57058	0	0	2	1.57058	0	0	2.1	1.57058	0	0	2.2	1.58394	0	0	1	1.58394	0	0	1.1	1.58394	0	0	1.2	1.58217
	1.55856	0	0	4	1.55856	0	0	4.1	1.55856	0	0	4.2	1.58029	0	0	3	1.58029	0	0	3.1	1.58029	0	0	3.2	1.57207	0	0	2	1.57207	0	0	2.1	1.57207	0	0	2.2	1.58543	0	0	1	1.58543	0	0	1.1	1.58543	0	0	1.2	1.58366
	1.56005	0	0	4	1.56005	0	0	4.1	1.56005	0	0	4.2	1.58178	0	0	3	1.58178	0	0	3.1	1.58178	0	0	3.2	1.57355	0	0	2	1.57355	0	0	2.1	1.57355	0	0	2.2	1.58691	0	0	1	1.58691	0	0	1.1	1.58691	0	0	1.2	1.58514
	1.56126	0	0	4	1.56126	0	0	4.1	1.56126	0	0	4.2	1.58298	0	0	3	1.58298	0	0	3.1	1.58298	0	0	3.2	1.57476	0	0	2	1.57476	0	0	2.1	1.57476	0	0	2.2	1.58812	0	0	1	1.58812	0	0	1.1	1.58812	0	0	1.2	1.58635
	1.56577	0	0	4	1.56577	0	0	4.1	1.56577	0	0	4.2	1.58749	0	0	3	1.58749	0	0	3.1	1.58749	0	0	3.2	1.57927	0	0	2	1.57927	0	0	2.1	1.57927	0	0	2.2	1.59263	0	0	1	1.59263	0	0	1.1	1.59263	0	0	1.2	1.59086
	1.56702	0	0	4	1.56702	0	0	4.1	1.56702	0	0	4.2	1.58898	0	0	3	1.58898	0	0	3.1	1.58898	0	0	3.2	1.58075	0	0	2	1.58075	0	0	2.1	1.58075	0	0	2.2	1.59411	0	0	1	1.59411	0	0	1.1	1.59411	0	0	1.2	1.59234
	1.56851	0	0	4	1.56851	0	0	4.1	1.56851	0	0	4.2	1.59046	0	0	3	1.59046	0	0	3.1	1.59046	0	0	3.2	1.58224	0	0	2	1.58224	0	0	2.1	1.58224	0	0	2.2	1.5956	0	0	1	1.5956	0	0	1.1	1.5956	0	0	1.2	1.59383
	1.56972	0	0	4	1.56972	0	0	4.1	1.56972	0	0	4.2	1.59167	0	0	3	1.59167	0	0	3.1	1.59167	0	0	3.2	1.58344	0	0	2	1.58344	0	0	2.1	1.58344	0	0	2.2	1.59681	0	0	1	1.59681	0	0	1.1	1.59681	0	0	1.2	1.59503
	1.57423	0	0	4	1.57423	0	0	4.1	1.57423	0	0	4.2	1.59771	0	0	3	1.59771	0	0	3.1	1.59771	0	0	3.2	1.58795	0	0	2	1.58795	0	0	2.1	1.58795	0	0	2.2	1.60131	0	0	1	1.60131	0	0	1.1	1.60131	0	0	1.2	1.60035
	1.57548	0	0	4	1.57548	0	0	4.1	1.57548	0	0	4.2	1.5992	0	0	3	1.5992	0	0	3.1	1.5992	0	0	3.2	1.58944	0	0	2	1.58944	0	0	2.1	1.58944	0	0	2.2	1.6028	0	0	1	1.6028	0	0	1.1	1.6028	0	0	1.2	1.60183
	1.57697	0	0	4	1.57697	0	0	4.1	1.57697	0	0	4.2	1.60069	0	0	3	1.60069	0	0	3.1	1.60069	0	0	3.2	1.59092	0	0	2	1.59092	0	0	2.1	1.59092	0	0	2.2	1.60429	0	0	1	1.60429	0	0	1.1	1.60429	0	0	1.2	1.60309
	1.57818	0	0	4	1.57818	0	0	4.1	1.57818	0	0	4.2	1.6019	0	0	3	1.6019	0	0	3.1	1.6019	0	0	3.2	1.59213	0	0	2	1.59213	0	0	2.1	1.59213	0	0	2.2	1.60549	0	0	1	1.60549	0	0	1.1	1.60549	0	0	1.2	1.60429
	1.58268	0	0	4	1.58268	0	0	4.1	1.58268	0	0	4.2	1.6064	0	0	3	1.6064	0	0	3.1	1.6064	0	0	3.2	1.59664	0	0	2	1.59664	0	0	2.1	1.59664	0	0	2.2	1.61	0	0	1	1.61	0	0	1.1	1.61	0	0	1.2	1.6088
	1.58417	0	0	4	1.58417	0	0	4.1	1.58417	0	0	4.2	1.60791	0	0	3	1.60791	0	0	3.1	1.60791	0	0	3.2	1.59812	0	0	2	1.59812	0	0	2.1	1.59812	0	0	2.2	1.61126	0	0	1	1.61126	0	0	1.1	1.61126	0	0	1.2	1.61006
	1.58566	0	0	4	1.58566	0	0	4.1	1.58566	0	0	4.2	1.60939	0	0	3	1.60939	0	0	3.1	1.60939	0	0	3.2	1.59961	0	0	2	1.59961	0	0	2.1	1.59961	0	0	2.2	1.61264	0	0	1	1.61264	0	0	1.1	1.61264	0	0	1.2	1.61154
	1.58687	0	0	4	1.58687	0	0	4.1	1.58687	0	0	4.2	1.6106	0	0	3	1.6106	0	0	3.1	1.6106	0	0	3.2	1.60081	0	0	2	1.60081	0	0	2.1	1.60081	0	0	2.2	1.61384	0	0	1	1.61384	0	0	1.1	1.61384	0	0	1.2	1.61275
	1.59137	0	0	4	1.59137	0	0	4.1	1.59137	0	0	4.2	1.61511	0	0	3	1.61511	0	0	3.1	1.61511	0	0	3.2	1.60532	0	0	2	1.60532	0	0	2.1	1.60532	0	0	2.2	1.61835	0	0	1	1.61835	0	0	1.1	1.61835	0	0	1.2	1.61726
	1.59286	0	0	4	1.59286	0	0	4.1	1.59286	0	0	4.2	1.61659	0	0	3	1.61659	0	0	3.1	1.61659	0	0	3.2	1.60681	0	0	2	1.60681	0	0	2.1	1.60681	0	0	2.2	1.61984	0	0	1	1.61984	0	0	1.1	1.61984	0	0	1.2	1.61851
	1.59435	0	0	4	1.59435	0	0	4.1	1.59435	0	0	4.2	1.61808	0	0	3	1.61808	0	0	3.1	1.61808	0	0	3.2	1.6083	0	0	2	1.6083	0	0	2.1	1.6083	0	0	2.2	1.62132	0	0	1	1.62132	0	0	1.1	1.62132	0	0	1.2	1.62
	1.59556	0	0	4	1.59556	0	0	4.1	1.59556	0	0	4.2	1.61928	0	0	3	1.61928	0	0	3.1	1.61928	0	0	3.2	1.60951	0	0	2	1.60951	0	0	2.1	1.60951	0	0	2.2	1.62253	0	0	1	1.62253	0	0	1.1	1.62253	0	0	1.2	1.6212
	1.60006	0	0	4	1.60006	0	0	4.1	1.60006	0	0	4.2	1.62379	0	0	3	1.62379	0	0	3.1	1.62379	0	0	3.2	1.61402	0	0	2	1.61402	0	0	2.1	1.61402	0	0	2.2	1.62704	0	0	1	1.62704	0	0	1.1	1.62704	0	0	1.2	1.62571
	1.60155	0	0	4	1.60155	0	0	4.1	1.60155	0	0	4.2	1.62528	0	0	3	1.62528	0	0	3.1	1.62528	0	0	3.2	1.6155	0	0	2	1.6155	0	0	2.1	1.6155	0	0	2.2	1.62852	0	0	1	1.62852	0	0	1.1	1.62852	0	0	1.2	1.6272
	1.60304	0	0	4	1.60304	0	0	4.1	1.60304	0	0	4.2	1.62676	0	0	3	1.62676	0	0	3.1	1.62676	0	0	3.2	1.61699	0	0	2	1.61699	0	0	2.1	1.61699	0	0	2.2	1.63001	0	0	1	1.63001	0	0	1.1	1.63001	0	0	1.2	1.62869
	1.60424	0	0	4	1.60424	0	0	4.1	1.60424	0	0	4.2	1.62797	0	0	3	1.62797	0	0	3.1	1.62797	0	0	3.2	1.61819	0	0	2	1.61819	0	0	2.1	1.61819	0	0	2.2	1.63121	0	0	1	1.63121	0	0	1.1	1.63121	0	0	1.2	1.62989
	1.60875	0	0	4	1.60875	0	0	4.1	1.60875	0	0	4.2	1.63248	0	0	3	1.63248	0	0	3.1	1.63248	0	0	3.2	1.6227	0	0	2	1.6227	0	0	2.1	1.6227	0	0	2.2	1.63572	0	0	1	1.63572	0	0	1.1	1.63572	0	0	1.2	1.6344
	1.61024	0	0	4	1.61024	0	0	4.1	1.61024	0	0	4.2	1.63396	0	0	3	1.63396	0	0	3.1	1.63396	0	0	3.2	1.6241	0	0	2	1.6241	0	0	2.1	1.6241	0	0	2.2	1.63721	0	0	1	1.63721	0	0	1.1	1.63721	0	0	1.2	1.63589
	1.61173	0	0	4	1.61173	0	0	4.1	1.61173	0	0	4.2	1.63545	0	0	3	1.63545	0	0	3.1	1.63545	0	0	3.2	1.62559	0	0	2	1.62559	0	0	2.1	1.62559	0	0	2.2	1.63869	0	0	1	1.63869	0	0	1.1	1.63869	0	0	1.2	1.63737
	1.61293	0	0	4	1.61293	0	0	4.1	1.61293	0	0	4.2	1.63666	0	0	3	1.63666	0	0	3.1	1.63666	0	0	3.2	1.62679	0	0	2	1.62679	0	0	2.1	1.62679	0	0	2.2	1.6399	0	0	1	1.6399	0	0	1.1	1.6399	0	0	1.2	1.63858
	1.61744	0	0	4	1.61744	0	0	4.1	1.61744	0	0	4.2	1.64117	0	0	3	1.64117	0	0	3.1	1.64117	0	0	3.2	1.6313	0	0	2	1.6313	0	0	2.1	1.6313	0	0	2.2	1.64441	0	0	1	1.64441	0	0	1.1	1.64441	0	0	1.2	1.64309
	1.61893	0	0	4	1.61893	0	0	4.1	1.61893	0	0	4.2	1.64265	0	0	3	1.64265	0	0	3.1	1.64265	0	0	3.2	1.63279	0	0	2	1.63279	0	0	2.1	1.63279	0	0	2.2	1.6459	0	0	1	1.6459	0	0	1.1	1.6459	0	0	1.2	1.64458
	1.62041	0	0	4	1.62041	0	0	4.1	1.62041	0	0	4.2	1.64414	0	0	3	1.64414	0	0	3.1	1.64414	0	0	3.2	1.63427	0	0	2	1.63427	0	0	2.1	1.63427	0	0	2.2	1.64738	0	0	1	1.64738	0	0	1.1	1.64738	0	0	1.2	1.64606
	1.62162	0	0	4	1.62162	0	0	4.1	1.62162	0	0	4.2	1.64534	0	0	3	1.64534	0	0	3.1	1.64534	0	0	3.2	1.63548	0	0	2	1.63548	0	0	2.1	1.63548	0	0	2.2	1.64859	0	0	1	1.64859	0	0	1.1	1.64859	0	0	1.2	1.64727
	1.62613	0	0	4	1.62613	0	0	4.1	1.62613	0	0	4.2	1.64985	0	0	3	1.64985	0	0	3.1	1.64985	0	0	3.2	1.63999	0	0	2	1.63999	0	0	2.1	1.63999	0	0	2.2	1.6531	0	0	1	1.6531	0	0	1.1	1.6531	0	0	1.2	1.65178
	1.62754	0	0	4	1.62754	0	0	4.1	1.62754	0	0	4.2	1.65134	0	0	3	1.65134	0	0	3.1	1.65134	0	0	3.2	1.64147	0	0	2	1.64147	0	0	2.1	1.64147	0	0	2.2	1.65458	0	0	1	1.65458	0	0	1.1	1.65458	0	0	1.2	1.65328
	1.62903	0	0	4	1.62903	0	0	4.1	1.62903	0	0	4.2	1.65282	0	0	3	1.65282	0	0	3.1	1.65282	0	0	3.2	1.64296	0	0	2	1.64296	0	0	2.1	1.64296	0	0	2.2	1.65607	0	0	1	1.65607	0	0	1.1	1.65607	0	0	1.2	1.65476
	1.63023	0	0	4	1.63023	0	0	4.1	1.63023	0	0	4.2	1.65403	0	0	3	1.65403	0	0	3.1	1.65403	0	0	3.2	1.64417	0	0	2	1.64417	0	0	2.1	1.64417	0	0	2.2	1.65728	0	0	1	1.65728	0	0	1.1	1.65728	0	0	1.2	1.65597
	1.63474	0	0	4	1.63474	0	0	4.1	1.63474	0	0	4.2	1.65854	0	0	3	1.65854	0	0	3.1	1.65854	0	0	3.2	1.64867	0	0	2	1.64867	0	0	2.1	1.64867	0	0	2.2	1.66178	0	0	1	1.66178	0	0	1.1	1.66178	0	0	1.2	1.66048
	1.63623	0	0	4	1.63623	0	0	4.1	1.63623	0	0	4.2	1.66002	0	0	3	1.66002	0	0	3.1	1.66002	0	0	3.2	1.65016	0	0	2	1.65016	0	0	2.1	1.65016	0	0	2.2	1.66307	0	0	1	1.66307	0	0	1.1	1.66307	0	0	1.2	1.66189
	1.63771	0	0	4	1.63771	0	0	4.1	1.63771	0	0	4.2	1.66151	0	0	3	1.66151	0	0	3.1	1.66151	0	0	3.2	1.65165	0	0	2	1.65165	0	0	2.1	1.65165	0	0	2.2	1.66456	0	0	1	1.66456	0	0	1.1	1.66456	0	0	1.2	1.66338
	1.63892	0	0	4	1.63892	0	0	4.1	1.63892	0	0	4.2	1.66272	0	0	3	1.66272	0	0	3.1	1.66272	0	0	3.2	1.65285	0	0	2	1.65285	0	0	2.1	1.65285	0	0	2.2	1.66576	0	0	1	1.66576	0	0	1.1	1.66576	0	0	1.2	1.66458
	1.64343	0	0	4	1.64343	0	0	4.1	1.64343	0	0	4.2	1.66723	0	0	3	1.66723	0	0	3.1	1.66723	0	0	3.2	1.65736	0	0	2	1.65736	0	0	2.1	1.65736	0	0	2.2	1.67027	0	0	1	1.67027	0	0	1.1	1.67027	0	0	1.2	1.66909
	1.64491	0	0	4	1.64491	0	0	4.1	1.64491	0	0	4.2	1.6686	0	0	3	1.6686	0	0	3.1	1.6686	0	0	3.2	1.65885	0	0	2	1.65885	0	0	2.1	1.65885	0	0	2.2	1.67176	0	0	1	1.67176	0	0	1.1	1.67176	0	0	1.2	1.67054
	1.6464	0	0	4	1.6464	0	0	4.1	1.6464	0	0	4.2	1.67008	0	0	3	1.67008	0	0	3.1	1.67008	0	0	3.2	1.66034	0	0	2	1.66034	0	0	2.1	1.66034	0	0	2.2	1.67301	0	0	1	1.67301	0	0	1.1	1.67301	0	0	1.2	1.67202
	1.6476	0	0	4	1.6476	0	0	4.1	1.6476	0	0	4.2	1.67129	0	0	3	1.67129	0	0	3.1	1.67129	0	0	3.2	1.66154	0	0	2	1.66154	0	0	2.1	1.66154	0	0	2.2	1.67422	0	0	1	1.67422	0	0	1.1	1.67422	0	0	1.2	1.67323
	1.65211	0	0	4	1.65211	0	0	4.1	1.65211	0	0	4.2	1.6758	0	0	3	1.6758	0	0	3.1	1.6758	0	0	3.2	1.66605	0	0	2	1.66605	0	0	2.1	1.66605	0	0	2.2	1.67884	0	0	1	1.67884	0	0	1.1	1.67884	0	0	1.2	1.67774
	1.65359	0	0	4	1.65359	0	0	4.1	1.65359	0	0	4.2	1.67729	0	0	3	1.67729	0	0	3.1	1.67729	0	0	3.2	1.66754	0	0	2	1.66754	0	0	2.1	1.66754	0	0	2.2	1.68032	0	0	1	1.68032	0	0	1.1	1.68032	0	0	1.2	1.67923
	1.65508	0	0	4	1.65508	0	0	4.1	1.65508	0	0	4.2	1.67877	0	0	3	1.67877	0	0	3.1	1.67877	0	0	3.2	1.66902	0	0	2	1.66902	0	0	2.1	1.66902	0	0	2.2	1.68181	0	0	1	1.68181	0	0	1.1	1.68181	0	0	1.2	1.68071
	1.65628	0	0	4	1.65628	0	0	4.1	1.65628	0	0	4.2	1.67998	0	0	3	1.67998	0	0	3.1	1.67998	0	0	3.2	1.67023	0	0	2	1.67023	0	0	2.1	1.67023	0	0	2.2	1.68301	0	0	1	1.68301	0	0	1.1	1.68301	0	0	1.2	1.68192
	1.66079	0	0	4	1.66079	0	0	4.1	1.66079	0	0	4.2	1.68449	0	0	3	1.68449	0	0	3.1	1.68449	0	0	3.2	1.67474	0	0	2	1.67474	0	0	2.1	1.67474	0	0	2.2	1.68752	0	0	1	1.68752	0	0	1.1	1.68752	0	0	1.2	1.68643
	1.66228	0	0	4	1.66228	0	0	4.1	1.66228	0	0	4.2	1.68597	0	0	3	1.68597	0	0	3.1	1.68597	0	0	3.2	1.67622	0	0	2	1.67622	0	0	2.1	1.67622	0	0	2.2	1.68901	0	0	1	1.68901	0	0	1.1	1.68901	0	0	1.2	1.68792
	1.66376	0	0	4	1.66376	0	0	4.1	1.66376	0	0	4.2	1.68746	0	0	3	1.68746	0	0	3.1	1.68746	0	0	3.2	1.67771	0	0	2	1.67771	0	0	2.1	1.67771	0	0	2.2	1.69049	0	0	1	1.69049	0	0	1.1	1.69049	0	0	1.2	1.68941
	1.66497	0	0	4	1.66497	0	0	4.1	1.66497	0	0	4.2	1.68866	0	0	3	1.68866	0	0	3.1	1.68866	0	0	3.2	1.67891	0	0	2	1.67891	0	0	2.1	1.67891	0	0	2.2	1.6917	0	0	1	1.6917	0	0	1.1	1.6917	0	0	1.2	1.69061
	1.66948	0	0	4	1.66948	0	0	4.1	1.66948	0	0	4.2	1.69317	0	0	3	1.69317	0	0	3.1	1.69317	0	0	3.2	1.68353	0	0	2	1.68353	0	0	2.1	1.68353	0	0	2.2	1.69621	0	0	1	1.69621	0	0	1.1	1.69621	0	0	1.2	1.69512
	1.67074	0	0	4	1.67074	0	0	4.1	1.67074	0	0	4.2	1.69465	0	0	3	1.69465	0	0	3.1	1.69465	0	0	3.2	1.68502	0	0	2	1.68502	0	0	2.1	1.68502	0	0	2.2	1.69769	0	0	1	1.69769	0	0	1.1	1.69769	0	0	1.2	1.69661
	1.67222	0	0	4	1.67222	0	0	4.1	1.67222	0	0	4.2	1.69614	0	0	3	1.69614	0	0	3.1	1.69614	0	0	3.2	1.68652	0	0	2	1.68652	0	0	2.1	1.68652	0	0	2.2	1.69918	0	0	1	1.69918	0	0	1.1	1.69918	0	0	1.2	1.6981
	1.67343	0	0	4	1.67343	0	0	4.1	1.67343	0	0	4.2	1.69734	0	0	3	1.69734	0	0	3.1	1.69734	0	0	3.2	1.68773	0	0	2	1.68773	0	0	2.1	1.68773	0	0	2.2	1.70039	0	0	1	1.70039	0	0	1.1	1.70039	0	0	1.2	1.6993
	1.67794	0	0	4	1.67794	0	0	4.1	1.67794	0	0	4.2	1.70185	0	0	3	1.70185	0	0	3.1	1.70185	0	0	3.2	1.69224	0	0	2	1.69224	0	0	2.1	1.69224	0	0	2.2	1.70513	0	0	1	1.70513	0	0	1.1	1.70513	0	0	1.2	1.70381
	1.67942	0	0	4	1.67942	0	0	4.1	1.67942	0	0	4.2	1.70334	0	0	3	1.70334	0	0	3.1	1.70334	0	0	3.2	1.69372	0	0	2	1.69372	0	0	2.1	1.69372	0	0	2.2	1.70661	0	0	1	1.70661	0	0	1.1	1.70661	0	0	1.2	1.7053
	1.68091	0	0	4	1.68091	0	0	4.1	1.68091	0	0	4.2	1.70483	0	0	3	1.70483	0	0	3.1	1.70483	0	0	3.2	1.69521	0	0	2	1.69521	0	0	2.1	1.69521	0	0	2.2	1.7081	0	0	1	1.7081	0	0	1.1	1.7081	0	0	1.2	1.70679
	1.68211	0	0	4	1.68211	0	0	4.1	1.68211	0	0	4.2	1.70603	0	0	3	1.70603	0	0	3.1	1.70603	0	0	3.2	1.69641	0	0	2	1.69641	0	0	2.1	1.69641	0	0	2.2	1.7101	0	0	1	1.7101	0	0	1.1	1.7101	0	0	1.2	1.70799
	1.68662	0	0	4	1.68662	0	0	4.1	1.68662	0	0	4.2	1.71054	0	0	3	1.71054	0	0	3.1	1.71054	0	0	3.2	1.70092	0	0	2	1.70092	0	0	2.1	1.70092	0	0	2.2	1.71484	0	0	1	1.71484	0	0	1.1	1.71484	0	0	1.2	1.71262
	1.68811	0	0	4	1.68811	0	0	4.1	1.68811	0	0	4.2	1.71203	0	0	3	1.71203	0	0	3.1	1.71203	0	0	3.2	1.70241	0	0	2	1.70241	0	0	2.1	1.70241	0	0	2.2	1.71633	0	0	1	1.71633	0	0	1.1	1.71633	0	0	1.2	1.71411
	1.6896	0	0	4	1.6896	0	0	4.1	1.6896	0	0	4.2	1.71351	0	0	3	1.71351	0	0	3.1	1.71351	0	0	3.2	1.70389	0	0	2	1.70389	0	0	2.1	1.70389	0	0	2.2	1.71782	0	0	1	1.71782	0	0	1.1	1.71782	0	0	1.2	1.71559
	1.6908	0	0	4	1.6908	0	0	4.1	1.6908	0	0	4.2	1.71472	0	0	3	1.71472	0	0	3.1	1.71472	0	0	3.2	1.7051	0	0	2	1.7051	0	0	2.1	1.7051	0	0	2.2	1.71982	0	0	1	1.71982	0	0	1.1	1.71982	0	0	1.2	1.71758
	1.69531	0	0	4	1.69531	0	0	4.1	1.69531	0	0	4.2	1.71923	0	0	3	1.71923	0	0	3.1	1.71923	0	0	3.2	1.70961	0	0	2	1.70961	0	0	2.1	1.70961	0	0	2.2	1.72433	0	0	1	1.72433	0	0	1.1	1.72433	0	0	1.2	1.72208
	1.69679	0	0	4	1.69679	0	0	4.1	1.69679	0	0	4.2	1.72071	0	0	3	1.72071	0	0	3.1	1.72071	0	0	3.2	1.71109	0	0	2	1.71109	0	0	2.1	1.71109	0	0	2.2	1.72582	0	0	1	1.72582	0	0	1.1	1.72582	0	0	1.2	1.72357
	1.69828	0	0	4	1.69828	0	0	4.1	1.69828	0	0	4.2	1.7222	0	0	3	1.7222	0	0	3.1	1.7222	0	0	3.2	1.71258	0	0	2	1.71258	0	0	2.1	1.71258	0	0	2.2	1.7273	0	0	1	1.7273	0	0	1.1	1.7273	0	0	1.2	1.72506
	1.69949	0	0	4	1.69949	0	0	4.1	1.69949	0	0	4.2	1.7234	0	0	3	1.7234	0	0	3.1	1.7234	0	0	3.2	1.71379	0	0	2	1.71379	0	0	2.1	1.71379	0	0	2.2	1.72851	0	0	1	1.72851	0	0	1.1	1.72851	0	0	1.2	1.72626
	1.70399	0	0	4	1.70399	0	0	4.1	1.70399	0	0	4.2	1.72792	0	0	3	1.72792	0	0	3.1	1.72792	0	0	3.2	1.71829	0	0	2	1.71829	0	0	2.1	1.71829	0	0	2.2	1.73302	0	0	1	1.73302	0	0	1.1	1.73302	0	0	1.2	1.73077
	1.70548	0	0	4	1.70548	0	0	4.1	1.70548	0	0	4.2	1.7294	0	0	3	1.7294	0	0	3.1	1.7294	0	0	3.2	1.71978	0	0	2	1.71978	0	0	2.1	1.71978	0	0	2.2	1.7345	0	0	1	1.7345	0	0	1.1	1.7345	0	0	1.2	1.73226
	1.70697	0	0	4	1.70697	0	0	4.1	1.70697	0	0	4.2	1.73089	0	0	3	1.73089	0	0	3.1	1.73089	0	0	3.2	1.72127	0	0	2	1.72127	0	0	2.1	1.72127	0	0	2.2	1.73599	0	0	1	1.73599	0	0	1.1	1.73599	0	0	1.2	1.73374
	1.70817	0	0	4	1.70817	0	0	4.1	1.70817	0	0	4.2	1.73209	0	0	3	1.73209	0	0	3.1	1.73209	0	0	3.2	1.72247	0	0	2	1.72247	0	0	2.1	1.72247	0	0	2.2	1.73719	0	0	1	1.73719	0	0	1.1	1.73719	0	0	1.2	1.73495
	1.71268	0	0	4	1.71268	0	0	4.1	1.71268	0	0	4.2	1.7366	0	0	3	1.7366	0	0	3.1	1.7366	0	0	3.2	1.72698	0	0	2	1.72698	0	0	2.1	1.72698	0	0	2.2	1.7417	0	0	1	1.7417	0	0	1.1	1.7417	0	0	1.2	1.73946
	1.71417	0	0	4	1.71417	0	0	4.1	1.71417	0	0	4.2	1.73809	0	0	3	1.73809	0	0	3.1	1.73809	0	0	3.2	1.72847	0	0	2	1.72847	0	0	2.1	1.72847	0	0	2.2	1.74319	0	0	1	1.74319	0	0	1.1	1.74319	0	0	1.2	1.74094
	1.71565	0	0	4	1.71565	0	0	4.1	1.71565	0	0	4.2	1.73958	0	0	3	1.73958	0	0	3.1	1.73958	0	0	3.2	1.72996	0	0	2	1.72996	0	0	2.1	1.72996	0	0	2.2	1.74468	0	0	1	1.74468	0	0	1.1	1.74468	0	0	1.2	1.74243
	1.71686	0	0	4	1.71686	0	0	4.1	1.71686	0	0	4.2	1.74078	0	0	3	1.74078	0	0	3.1	1.74078	0	0	3.2	1.73116	0	0	2	1.73116	0	0	2.1	1.73116	0	0	2.2	1.74588	0	0	1	1.74588	0	0	1.1	1.74588	0	0	1.2	1.74364
	1.72159	0	0	4	1.72159	0	0	4.1	1.72159	0	0	4.2	1.74529	0	0	3	1.74529	0	0	3.1	1.74529	0	0	3.2	1.73567	0	0	2	1.73567	0	0	2.1	1.73567	0	0	2.2	1.75039	0	0	1	1.75039	0	0	1.1	1.75039	0	0	1.2	1.74814
	1.72308	0	0	4	1.72308	0	0	4.1	1.72308	0	0	4.2	1.74678	0	0	3	1.74678	0	0	3.1	1.74678	0	0	3.2	1.73718	0	0	2	1.73718	0	0	2.1	1.73718	0	0	2.2	1.75188	0	0	1	1.75188	0	0	1.1	1.75188	0	0	1.2	1.74963
	1.72456	0	0	4	1.72456	0	0	4.1	1.72456	0	0	4.2	1.74826	0	0	3	1.74826	0	0	3.1	1.74826	0	0	3.2	1.73866	0	0	2	1.73866	0	0	2.1	1.73866	0	0	2.2	1.75336	0	0	1	1.75336	0	0	1.1	1.75336	0	0	1.2	1.75111
	1.72657	0	0	4	1.72657	0	0	4.1	1.72657	0	0	4.2	1.74947	0	0	3	1.74947	0	0	3.1	1.74947	0	0	3.2	1.73987	0	0	2	1.73987	0	0	2.1	1.73987	0	0	2.2	1.75457	0	0	1	1.75457	0	0	1.1	1.75457	0	0	1.2	1.75232
	1.73108	0	0	4	1.73108	0	0	4.1	1.73108	0	0	4.2	1.75398	0	0	3	1.75398	0	0	3.1	1.75398	0	0	3.2	1.74438	0	0	2	1.74438	0	0	2.1	1.74438	0	0	2.2	1.75908	0	0	1	1.75908	0	0	1.1	1.75908	0	0	1.2	1.75683
	1.73257	0	0	4	1.73257	0	0	4.1	1.73257	0	0	4.2	1.75546	0	0	3	1.75546	0	0	3.1	1.75546	0	0	3.2	1.74586	0	0	2	1.74586	0	0	2.1	1.74586	0	0	2.2	1.76056	0	0	1	1.76056	0	0	1.1	1.76056	0	0	1.2	1.75832
	1.73406	0	0	4	1.73406	0	0	4.1	1.73406	0	0	4.2	1.75695	0	0	3	1.75695	0	0	3.1	1.75695	0	0	3.2	1.74735	0	0	2	1.74735	0	0	2.1	1.74735	0	0	2.2	1.76205	0	0	1	1.76205	0	0	1.1	1.76205	0	0	1.2	1.7598
	1.73526	0	0	4	1.73526	0	0	4.1	1.73526	0	0	4.2	1.75815	0	0	3	1.75815	0	0	3.1	1.75815	0	0	3.2	1.74855	0	0	2	1.74855	0	0	2.1	1.74855	0	0	2.2	1.76325	0	0	1	1.76325	0	0	1.1	1.76325	0	0	1.2	1.76101
	1.73977	0	0	4	1.73977	0	0	4.1	1.73977	0	0	4.2	1.76266	0	0	3	1.76266	0	0	3.1	1.76266	0	0	3.2	1.75306	0	0	2	1.75306	0	0	2.1	1.75306	0	0	2.2	1.76776	0	0	1	1.76776	0	0	1.1	1.76776	0	0	1.2	1.76653
	1.74103	0	0	4	1.74103	0	0	4.1	1.74103	0	0	4.2	1.76415	0	0	3	1.76415	0	0	3.1	1.76415	0	0	3.2	1.75455	0	0	2	1.75455	0	0	2.1	1.75455	0	0	2.2	1.76925	0	0	1	1.76925	0	0	1.1	1.76925	0	0	1.2	1.76801
	1.74251	0	0	4	1.74251	0	0	4.1	1.74251	0	0	4.2	1.76563	0	0	3	1.76563	0	0	3.1	1.76563	0	0	3.2	1.75603	0	0	2	1.75603	0	0	2.1	1.75603	0	0	2.2	1.77074	0	0	1	1.77074	0	0	1.1	1.77074	0	0	1.2	1.76927
	1.74372	0	0	4	1.74372	0	0	4.1	1.74372	0	0	4.2	1.76684	0	0	3	1.76684	0	0	3.1	1.76684	0	0	3.2	1.75724	0	0	2	1.75724	0	0	2.1	1.75724	0	0	2.2	1.77194	30907.5	0.0132903	1.01329	1.77194	0	0	1.1	1.77194	0	0	1.2	1.77048
	1.74823	0	0	4	1.74823	0	0	4.1	1.74823	0	0	4.2	1.77135	0	0	3	1.77135	0	0	3.1	1.77135	0	0	3.2	1.76329	0	0	2	1.76329	0	0	2.1	1.76329	0	0	2.2	1.77645	0	0	1	1.77645	0	0	1.1	1.77645	0	0	1.2	1.77499
	1.74972	0	0	4	1.74972	0	0	4.1	1.74972	0	0	4.2	1.77284	0	0	3	1.77284	0	0	3.1	1.77284	0	0	3.2	1.76477	0	0	2	1.76477	0	0	2.1	1.76477	0	0	2.2	1.77793	0	0	1	1.77793	0	0	1.1	1.77793	0	0	1.2	1.77624
	1.7512	0	0	4	1.7512	0	0	4.1	1.7512	0	0	4.2	1.77432	0	0	3	1.77432	0	0	3.1	1.77432	0	0	3.2	1.76626	0	0	2	1.76626	0	0	2.1	1.76626	0	0	2.2	1.77942	0	0	1	1.77942	0	0	1.1	1.77942	0	0	1.2	1.77773
	1.75241	0	0	4	1.75241	0	0	4.1	1.75241	0	0	4.2	1.77553	0	0	3	1.77553	0	0	3.1	1.77553	0	0	3.2	1.76746	0	0	2	1.76746	0	0	2.1	1.76746	0	0	2.2	1.78063	0	0	1	1.78063	0	0	1.1	1.78063	0	0	1.2	1.77893
	1.75692	0	0	4	1.75692	0	0	4.1	1.75692	0	0	4.2	1.78003	0	0	3	1.78003	0	0	3.1	1.78003	0	0	3.2	1.77197	0	0	2	1.77197	0	0	2.1	1.77197	0	0	2.2	1.78514	0	0	1	1.78514	0	0	1.1	1.78514	0	0	1.2	1.78344
	1.75841	0	0	4	1.75841	0	0	4.1	1.75841	0	0	4.2	1.78152	0	0	3	1.78152	0	0	3.1	1.78152	0	0	3.2	1.77346	0	0	2	1.77346	0	0	2.1	1.77346	0	0	2.2	1.78662	0	0	1	1.78662	0	0	1.1	1.78662	0	0	1.2	1.78493
	1.75991	0	0	4	1.75991	0	0	4.1	1.75991	0	0	4.2	1.783	0	0	3	1.783	0	0	3.1	1.783	0	0	3.2	1.77494	0	0	2	1.77494	0	0	2.1	1.77494	0	0	2.2	1.78811	0	0	1	1.78811	0	0	1.1	1.78811	0	0	1.2	1.78642
	1.76111	0	0	4	1.76111	0	0	4.1	1.76111	0	0	4.2	1.78421	0	0	3	1.78421	0	0	3.1	1.78421	0	0	3.2	1.77615	0	0	2	1.77615	0	0	2.1	1.77615	0	0	2.2	1.78931	0	0	1	1.78931	0	0	1.1	1.78931	0	0	1.2	1.78762
	1.76709	0	0	4	1.76709	0	0	4.1	1.76709	0	0	4.2	1.78872	0	0	3	1.78872	0	0	3.1	1.78872	0	0	3.2	1.78066	0	0	2	1.78066	0	0	2.1	1.78066	0	0	2.2	1.79382	0	0	1	1.79382	0	0	1.1	1.79382	0	0	1.2	1.79213
	1.76858	0	0	4	1.76858	0	0	4.1	1.76858	0	0	4.2	1.79021	0	0	3	1.79021	0	0	3.1	1.79021	0	0	3.2	1.78214	0	0	2	1.78214	0	0	2.1	1.78214	0	0	2.2	1.7953	0	0	1	1.7953	0	0	1.1	1.7953	0	0	1.2	1.79362
	1.77007	0	0	4	1.77007	0	0	4.1	1.77007	0	0	4.2	1.79146	0	0	3	1.79146	0	0	3.1	1.79146	0	0	3.2	1.78363	0	0	2	1.78363	0	0	2.1	1.78363	0	0	2.2	1.79679	0	0	1	1.79679	0	0	1.1	1.79679	0	0	1.2	1.7951
	1.77127	0	0	4	1.77127	0	0	4.1	1.77127	0	0	4.2	1.79267	0	0	3	1.79267	0	0	3.1	1.79267	0	0	3.2	1.78483	0	0	2	1.78483	0	0	2.1	1.78483	0	0	2.2	1.798	0	0	1	1.798	0	0	1.1	1.798	0	0	1.2	1.79631
	1.77578	0	0	4	1.77578	0	0	4.1	1.77578	0	0	4.2	1.79718	0	0	3	1.79718	0	0	3.1	1.79718	0	0	3.2	1.78934	0	0	2	1.78934	0	0	2.1	1.78934	0	0	2.2	1.8025	0	0	1	1.8025	0	0	1.1	1.8025	0	0	1.2	1.80082
	1.77727	0	0	4	1.77727	0	0	4.1	1.77727	0	0	4.2	1.79866	0	0	3	1.79866	0	0	3.1	1.79866	0	0	3.2	1.79083	0	0	2	1.79083	0	0	2.1	1.79083	0	0	2.2	1.80399	0	0	1	1.80399	0	0	1.1	1.80399	0	0	1.2	1.8023
	1.77876	0	0	4	1.77876	0	0	4.1	1.77876	0	0	4.2	1.80015	0	0	3	1.80015	0	0	3.1	1.80015	0	0	3.2	1.79232	0	0	2	1.79232	0	0	2.1	1.79232	0	0	2.2	1.80548	0	0	1	1.80548	0	0	1.1	1.80548	0	0	1.2	1.80379
	1.77996	0	0	4	1.77996	0	0	4.1	1.77996	0	0	4.2	1.80135	0	0	3	1.80135	0	0	3.1	1.80135	0	0	3.2	1.79352	0	0	2	1.79352	0	0	2.1	1.79352	0	0	2.2	1.80668	0	0	1	1.80668	0	0	1.1	1.80668	0	0	1.2	1.80499
	1.78447	0	0	4	1.78447	0	0	4.1	1.78447	0	0	4.2	1.80586	0	0	3	1.80586	0	0	3.1	1.80586	0	0	3.2	1.79803	0	0	2	1.79803	0	0	2.1	1.79803	0	0	2.2	1.81119	0	0	1	1.81119	0	0	1.1	1.81119	0	0	1.2	1.8095
	1.78595	0	0	4	1.78595	0	0	4.1	1.78595	0	0	4.2	1.80735	0	0	3	1.80735	0	0	3.1	1.80735	0	0	3.2	1.79952	0	0	2	1.79952	0	0	2.1	1.79952	0	0	2.2	1.81268	0	0	1	1.81268	0	0	1.1	1.81268	0	0	1.2	1.81099
	1.78744	0	0	4	1.78744	0	0	4.1	1.78744	0	0	4.2	1.80883	0	0	3	1.80883	0	0	3.1	1.80883	0	0	3.2	1.801	0	0	2	1.801	0	0	2.1	1.801	0	0	2.2	1.81416	0	0	1	1.81416	0	0	1.1	1.81416	0	0	1.2	1.81248
	1.78865	0	0	4	1.78865	0	0	4.1	1.78865	0	0	4.2	1.81004	0	0	3	1.81004	0	0	3.1	1.81004	0	0	3.2	1.80221	0	0	2	1.80221	0	0	2.1	1.80221	0	0	2.2	1.81537	0	0	1	1.81537	0	0	1.1	1.81537	0	0	1.2	1.81368
	1.79316	0	0	4	1.79316	0	0	4.1	1.79316	0	0	4.2	1.81455	0	0	3	1.81455	0	0	3.1	1.81455	0	0	3.2	1.80672	0	0	2	1.80672	0	0	2.1	1.80672	0	0	2.2	1.81988	0	0	1	1.81988	0	0	1.1	1.81988	0	0	1.2	1.81819
	1.79464	0	0	4	1.79464	0	0	4.1	1.79464	0	0	4.2	1.81603	0	0	3	1.81603	0	0	3.1	1.81603	0	0	3.2	1.8082	0	0	2	1.8082	0	0	2.1	1.8082	0	0	2.2	1.82113	0	0	1	1.82113	0	0	1.1	1.82113	0	0	1.2	1.81946
	1.79613	0	0	4	1.79613	0	0	4.1	1.79613	0	0	4.2	1.81752	0	0	3	1.81752	0	0	3.1	1.81752	0	0	3.2	1.80969	0	0	2	1.80969	0	0	2.1	1.80969	0	0	2.2	1.82262	0	0	1	1.82262	0	0	1.1	1.82262	0	0	1.2	1.82095
	1.79733	0	0	4	1.79733	0	0	4.1	1.79733	0	0	4.2	1.81872	0	0	3	1.81872	0	0	3.1	1.81872	0	0	3.2	1.81089	0	0	2	1.81089	0	0	2.1	1.81089	0	0	2.2	1.82382	0	0	1	1.82382	0	0	1.1	1.82382	0	0	1.2	1.82215
	1.80184	0	0	4	1.80184	0	0	4.1	1.80184	0	0	4.2	1.82323	0	0	3	1.82323	0	0	3.1	1.82323	0	0	3.2	1.8154	0	0	2	1.8154	0	0	2.1	1.8154	0	0	2.2	1.82833	0	0	1	1.82833	0	0	1.1	1.82833	0	0	1.2	1.82666
	1.80333	0	0	4	1.80333	0	0	4.1	1.80333	0	0	4.2	1.82472	0	0	3	1.82472	0	0	3.1	1.82472	0	0	3.2	1.81686	0	0	2	1.81686	0	0	2.1	1.81686	0	0	2.2	1.82982	0	0	1	1.82982	0	0	1.1	1.82982	0	0	1.2	1.82815
	1.80481	0	0	4	1.80481	0	0	4.1	1.80481	0	0	4.2	1.82621	0	0	3	1.82621	0	0	3.1	1.82621	0	0	3.2	1.81834	0	0	2	1.81834	0	0	2.1	1.81834	0	0	2.2	1.8313	0	0	1	1.8313	0	0	1.1	1.8313	0	0	1.2	1.82963
	1.80602	0	0	4	1.80602	0	0	4.1	1.80602	0	0	4.2	1.82741	0	0	3	1.82741	0	0	3.1	1.82741	0	0	3.2	1.81955	0	0	2	1.81955	0	0	2.1	1.81955	0	0	2.2	1.83251	0	0	1	1.83251	0	0	1.1	1.83251	0	0	1.2	1.83084
	1.81053	0	0	4	1.81053	0	0	4.1	1.81053	0	0	4.2	1.83192	0	0	3	1.83192	0	0	3.1	1.83192	0	0	3.2	1.82406	0	0	2	1.82406	0	0	2.1	1.82406	0	0	2.2	1.83702	0	0	1	1.83702	0	0	1.1	1.83702	0	0	1.2	1.83535
	1.81201	0	0	4	1.81201	0	0	4.1	1.81201	0	0	4.2	1.83341	0	0	3	1.83341	0	0	3.1	1.83341	0	0	3.2	1.82554	0	0	2	1.82554	0	0	2.1	1.82554	0	0	2.2	1.8385	0	0	1	1.8385	0	0	1.1	1.8385	0	0	1.2	1.83683
	1.81349	0	0	4	1.81349	0	0	4.1	1.81349	0	0	4.2	1.83487	0	0	3	1.83487	0	0	3.1	1.83487	0	0	3.2	1.82703	0	0	2	1.82703	0	0	2.1	1.82703	0	0	2.2	1.83999	0	0	1	1.83999	0	0	1.1	1.83999	0	0	1.2	1.83832
	1.8147	0	0	4	1.8147	0	0	4.1	1.8147	0	0	4.2	1.83608	0	0	3	1.83608	0	0	3.1	1.83608	0	0	3.2	1.82824	0	0	2	1.82824	0	0	2.1	1.82824	0	0	2.2	1.84119	0	0	1	1.84119	0	0	1.1	1.84119	0	0	1.2	1.83952
	1.81921	0	0	4	1.81921	0	0	4.1	1.81921	0	0	4.2	1.84059	0	0	3	1.84059	0	0	3.1	1.84059	0	0	3.2	1.83274	0	0	2	1.83274	0	0	2.1	1.83274	0	0	2.2	1.84581	0	0	1	1.84581	0	0	1.1	1.84581	0	0	1.2	1.84403
	1.8207	0	0	4	1.8207	0	0	4.1	1.8207	0	0	4.2	1.84208	0	0	3	1.84208	0	0	3.1	1.84208	0	0	3.2	1.83423	0	0	2	1.83423	0	0	2.1	1.83423	0	0	2.2	1.84729	0	0	1	1.84729	0	0	1.1	1.84729	0	0	1.2	1.84552
	1.82218	0	0	4	1.82218	0	0	4.1	1.82218	0	0	4.2	1.84356	0	0	3	1.84356	0	0	3.1	1.84356	0	0	3.2	1.83572	0	0	2	1.83572	0	0	2.1	1.83572	0	0	2.2	1.84878	0	0	1	1.84878	0	0	1.1	1.84878	0	0	1.2	1.84694
	1.82338	0	0	4	1.82338	0	0	4.1	1.82338	0	0	4.2	1.84477	0	0	3	1.84477	0	0	3.1	1.84477	0	0	3.2	1.83692	0	0	2	1.83692	0	0	2.1	1.83692	0	0	2.2	1.84999	0	0	1	1.84999	0	0	1.1	1.84999	0	0	1.2	1.84814
	1.82789	0	0	4	1.82789	0	0	4.1	1.82789	0	0	4.2	1.84928	0	0	3	1.84928	0	0	3.1	1.84928	0	0	3.2	1.84143	0	0	2	1.84143	0	0	2.1	1.84143	0	0	2.2	1.85449	0	0	1	1.85449	0	0	1.1	1.85449	0	0	1.2	1.85265
	1.82938	0	0	4	1.82938	0	0	4.1	1.82938	0	0	4.2	1.85076	0	0	3	1.85076	0	0	3.1	1.85076	0	0	3.2	1.84292	0	0	2	1.84292	0	0	2.1	1.84292	0	0	2.2	1.85598	0	0	1	1.85598	0	0	1.1	1.85598	0	0	1.2	1.85414
	1.83086	0	0	4	1.83086	0	0	4.1	1.83086	0	0	4.2	1.85225	0	0	3	1.85225	0	0	3.1	1.85225	0	0	3.2	1.8444	0	0	2	1.8444	0	0	2.1	1.8444	0	0	2.2	1.85747	0	0	1	1.85747	0	0	1.1	1.85747	0	0	1.2	1.85563
	1.83207	0	0	4	1.83207	0	0	4.1	1.83207	0	0	4.2	1.85345	0	0	3	1.85345	0	0	3.1	1.85345	0	0	3.2	1.84561	0	0	2	1.84561	0	0	2.1	1.84561	0	0	2.2	1.85867	0	0	1	1.85867	0	0	1.1	1.85867	0	0	1.2	1.85683
	1.83658	0	0	4	1.83658	0	0	4.1	1.83658	0	0	4.2	1.85796	0	0	3	1.85796	0	0	3.1	1.85796	0	0	3.2	1.85011	0	0	2	1.85011	0	0	2.1	1.85011	0	0	2.2	1.86318	0	0	1	1.86318	0	0	1.1	1.86318	0	0	1.2	1.86134
	1.83806	0	0	4	1.83806	0	0	4.1	1.83806	0	0	4.2	1.85945	0	0	3	1.85945	0	0	3.1	1.85945	0	0	3.2	1.8516	0	0	2	1.8516	0	0	2.1	1.8516	0	0	2.2	1.86467	0	0	1	1.86467	0	0	1.1	1.86467	0	0	1.2	1.86283
	1.83955	0	0	4	1.83955	0	0	4.1	1.83955	0	0	4.2	1.86093	0	0	3	1.86093	0	0	3.1	1.86093	0	0	3.2	1.85308	0	0	2	1.85308	0	0	2.1	1.85308	0	0	2.2	1.86615	0	0	1	1.86615	0	0	1.1	1.86615	0	0	1.2	1.86431
	1.84076	0	0	4	1.84076	0	0	4.1	1.84076	0	0	4.2	1.86214	0	0	3	1.86214	0	0	3.1	1.86214	0	0	3.2	1.85429	0	0	2	1.85429	0	0	2.1	1.85429	0	0	2.2	1.86818	0	0	1	1.86818	0	0	1.1	1.86818	0	0	1.2	1.86552
	1.84738	0	0	4	1.84738	0	0	4.1	1.84738	0	0	4.2	1.86665	0	0	3	1.86665	0	0	3.1	1.86665	0	0	3.2	1.8588	0	0	2	1.8588	0	0	2.1	1.8588	0	0	2.2	1.87291	0	0	1	1.87291	0	0	1.1	1.87291	0	0	1.2	1.87026
	1.84887	0	0	4	1.84887	0	0	4.1	1.84887	0	0	4.2	1.86813	0	0	3	1.86813	0	0	3.1	1.86813	0	0	3.2	1.86029	0	0	2	1.86029	0	0	2.1	1.86029	0	0	2.2	1.87441	0	0	1	1.87441	0	0	1.1	1.87441	0	0	1.2	1.87174
	1.85035	0	0	4	1.85035	0	0	4.1	1.85035	0	0	4.2	1.86962	0	0	3	1.86962	0	0	3.1	1.86962	0	0	3.2	1.86177	0	0	2	1.86177	0	0	2.1	1.86177	0	0	2.2	1.87589	0	0	1	1.87589	0	0	1.1	1.87589	0	0	1.2	1.87323
	1.85156	0	0	4	1.85156	0	0	4.1	1.85156	0	0	4.2	1.87082	0	0	3	1.87082	0	0	3.1	1.87082	0	0	3.2	1.86298	0	0	2	1.86298	0	0	2.1	1.86298	0	0	2.2	1.87791	0	0	1	1.87791	0	0	1.1	1.87791	0	0	1.2	1.87521
	1.85607	0	0	4	1.85607	0	0	4.1	1.85607	0	0	4.2	1.87533	0	0	3	1.87533	0	0	3.1	1.87533	0	0	3.2	1.86748	0	0	2	1.86748	0	0	2.1	1.86748	0	0	2.2	1.88265	0	0	1	1.88265	0	0	1.1	1.88265	0	0	1.2	1.87972
	1.85755	0	0	4	1.85755	0	0	4.1	1.85755	0	0	4.2	1.87682	0	0	3	1.87682	0	0	3.1	1.87682	0	0	3.2	1.86897	0	0	2	1.86897	0	0	2.1	1.86897	0	0	2.2	1.88413	0	0	1	1.88413	0	0	1.1	1.88413	0	0	1.2	1.88121
	1.85904	0	0	4	1.85904	0	0	4.1	1.85904	0	0	4.2	1.8783	0	0	3	1.8783	0	0	3.1	1.8783	0	0	3.2	1.87046	0	0	2	1.87046	0	0	2.1	1.87046	0	0	2.2	1.88561	0	0	1	1.88561	0	0	1.1	1.88561	0	0	1.2	1.88269
	1.86025	0	0	4	1.86025	0	0	4.1	1.86025	0	0	4.2	1.87951	0	0	3	1.87951	0	0	3.1	1.87951	0	0	3.2	1.87166	0	0	2	1.87166	0	0	2.1	1.87166	0	0	2.2	1.88763	0	0	1	1.88763	0	0	1.1	1.88763	0	0	1.2	1.8839
	1.86476	0	0	4	1.86476	0	0	4.1	1.86476	0	0	4.2	1.88402	0	0	3	1.88402	0	0	3.1	1.88402	0	0	3.2	1.87617	0	0	2	1.87617	0	0	2.1	1.87617	0	0	2.2	1.89214	0	0	1	1.89214	0	0	1.1	1.89214	0	0	1.2	1.88841
	1.86624	0	0	4	1.86624	0	0	4.1	1.86624	0	0	4.2	1.8855	0	0	3	1.8855	0	0	3.1	1.8855	0	0	3.2	1.87766	0	0	2	1.87766	0	0	2.1	1.87766	0	0	2.2	1.89363	0	0	1	1.89363	0	0	1.1	1.89363	0	0	1.2	1.88989
	1.86773	0	0	4	1.86773	0	0	4.1	1.86773	0	0	4.2	1.88699	0	0	3	1.88699	0	0	3.1	1.88699	0	0	3.2	1.87915	0	0	2	1.87915	0	0	2.1	1.87915	0	0	2.2	1.89512	0	0	1	1.89512	0	0	1.1	1.89512	0	0	1.2	1.89138
	1.86893	0	0	4	1.86893	0	0	4.1	1.86893	0	0	4.2	1.88819	0	0	3	1.88819	0	0	3.1	1.88819	0	0	3.2	1.88035	0	0	2	1.88035	0	0	2.1	1.88035	0	0	2.2	1.89633	0	0	1	1.89633	0	0	1.1	1.89633	0	0	1.2	1.89258
	1.87344	0	0	4	1.87344	0	0	4.1	1.87344	0	0	4.2	1.8927	0	0	3	1.8927	0	0	3.1	1.8927	0	0	3.2	1.88486	0	0	2	1.88486	0	0	2.1	1.88486	0	0	2.2	1.90083	0	0	1	1.90083	0	0	1.1	1.90083	0	0	1.2	1.89709
	1.87493	0	0	4	1.87493	0	0	4.1	1.87493	0	0	4.2	1.89419	0	0	3	1.89419	0	0	3.1	1.89419	0	0	3.2	1.88635	0	0	2	1.88635	0	0	2.1	1.88635	0	0	2.2	1.90232	0	0	1	1.90232	0	0	1.1	1.90232	0	0	1.2	1.89858
	1.87642	0	0	4	1.87642	0	0	4.1	1.87642	0	0	4.2	1.89568	0	0	3	1.89568	0	0	3.1	1.89568	0	0	3.2	1.88785	0	0	2	1.88785	0	0	2.1	1.88785	0	0	2.2	1.90381	0	0	1	1.90381	0	0	1.1	1.90381	0	0	1.2	1.90006
	1.87762	0	0	4	1.87762	0	0	4.1	1.87762	0	0	4.2	1.89688	0	0	3	1.89688	0	0	3.1	1.89688	0	0	3.2	1.88906	0	0	2	1.88906	0	0	2.1	1.88906	0	0	2.2	1.90501	0	0	1	1.90501	0	0	1.1	1.90501	0	0	1.2	1.90127
	1.88213	0	0	4	1.88213	0	0	4.1	1.88213	0	0	4.2	1.90139	0	0	3	1.90139	0	0	3.1	1.90139	0	0	3.2	1.89357	0	0	2	1.89357	0	0	2.1	1.89357	0	0	2.2	1.90952	0	0	1	1.90952	0	0	1.1	1.90952	0	0	1.2	1.90578
	1.88362	0	0	4	1.88362	0	0	4.1	1.88362	0	0	4.2	1.90288	0	0	3	1.90288	0	0	3.1	1.90288	0	0	3.2	1.89506	0	0	2	1.89506	0	0	2.1	1.89506	0	0	2.2	1.91101	0	0	1	1.91101	0	0	1.1	1.91101	0	0	1.2	1.90727
	1.8851	0	0	4	1.8851	0	0	4.1	1.8851	0	0	4.2	1.90436	0	0	3	1.90436	0	0	3.1	1.90436	0	0	3.2	1.89654	0	0	2	1.89654	0	0	2.1	1.89654	0	0	2.2	1.9125	0	0	1	1.9125	0	0	1.1	1.9125	0	0	1.2	1.90876
	1.88631	0	0	4	1.88631	0	0	4.1	1.88631	0	0	4.2	1.90557	0	0	3	1.90557	0	0	3.1	1.90557	0	0	3.2	1.89775	0	0	2	1.89775	0	0	2.1	1.89775	0	0	2.2	1.9137	0	0	1	1.9137	0	0	1.1	1.9137	0	0	1.2	1.90996
	1.89081	0	0	4	1.89081	0	0	4.1	1.89081	0	0	4.2	1.91008	0	0	3	1.91008	0	0	3.1	1.91008	0	0	3.2	1.90226	0	0	2	1.90226	0	0	2.1	1.90226	0	0	2.2	1.91821	0	0	1	1.91821	0	0	1.1	1.91821	0	0	1.2	1.91447
	1.8923	0	0	4	1.8923	0	0	4.1	1.8923	0	0	4.2	1.91156	0	0	3	1.91156	0	0	3.1	1.91156	0	0	3.2	1.90374	0	0	2	1.90374	0	0	2.1	1.90374	0	0	2.2	1.91969	0	0	1	1.91969	0	0	1.1	1.91969	0	0	1.2	1.91597
	1.89378	0	0	4	1.89378	0	0	4.1	1.89378	0	0	4.2	1.91305	0	0	3	1.91305	0	0	3.1	1.91305	0	0	3.2	1.90523	0	0	2	1.90523	0	0	2.1	1.90523	0	0	2.2	1.92118	0	0	1	1.92118	0	0	1.1	1.92118	0	0	1.2	1.91723
	1.89499	0	0	4	1.89499	0	0	4.1	1.89499	0	0	4.2	1.91425	0	0	3	1.91425	0	0	3.1	1.91425	0	0	3.2	1.90643	0	0	2	1.90643	0	0	2.1	1.90643	0	0	2.2	1.92238	0	0	1	1.92238	0	0	1.1	1.92238	0	0	1.2	1.91843
	1.8995	0	0	4	1.8995	0	0	4.1	1.8995	0	0	4.2	1.91876	0	0	3	1.91876	0	0	3.1	1.91876	0	0	3.2	1.91094	0	0	2	1.91094	0	0	2.1	1.91094	0	0	2.2	1.92689	0	0	1	1.92689	0	0	1.1	1.92689	0	0	1.2	1.92294
	1.90099	0	0	4	1.90099	0	0	4.1	1.90099	0	0	4.2	1.92025	0	0	3	1.92025	0	0	3.1	1.92025	0	0	3.2	1.91243	0	0	2	1.91243	0	0	2.1	1.91243	0	0	2.2	1.92838	0	0	1	1.92838	0	0	1.1	1.92838	0	0	1.2	1.92443
	1.90247	0	0	4	1.90247	0	0	4.1	1.90247	0	0	4.2	1.92174	0	0	3	1.92174	0	0	3.1	1.92174	0	0	3.2	1.91391	0	0	2	1.91391	0	0	2.1	1.91391	0	0	2.2	1.92987	0	0	1	1.92987	0	0	1.1	1.92987	0	0	1.2	1.92591
	1.90368	0	0	4	1.90368	0	0	4.1	1.90368	0	0	4.2	1.92294	0	0	3	1.92294	0	0	3.1	1.92294	0	0	3.2	1.91512	0	0	2	1.91512	0	0	2.1	1.91512	0	0	2.2	1.93107	0	0	1	1.93107	0	0	1.1	1.93107	0	0	1.2	1.92712
	1.90818	0	0	4	1.90818	0	0	4.1	1.90818	0	0	4.2	1.92745	0	0	3	1.92745	0	0	3.1	1.92745	0	0	3.2	1.91963	0	0	2	1.91963	0	0	2.1	1.91963	0	0	2.2	1.93558	0	0	1	1.93558	0	0	1.1	1.93558	0	0	1.2	1.93163
	1.90967	0	0	4	1.90967	0	0	4.1	1.90967	0	0	4.2	1.92894	0	0	3	1.92894	0	0	3.1	1.92894	0	0	3.2	1.92111	0	0	2	1.92111	0	0	2.1	1.92111	0	0	2.2	1.93707	0	0	1	1.93707	0	0	1.1	1.93707	0	0	1.2	1.93289
	1.91116	0	0	4	1.91116	0	0	4.1	1.91116	0	0	4.2	1.93043	0	0	3	1.93043	0	0	3.1	1.93043	0	0	3.2	1.9226	0	0	2	1.9226	0	0	2.1	1.9226	0	0	2.2	1.93855	0	0	1	1.93855	0	0	1.1	1.93855	0	0	1.2	1.93437
	1.91236	0	0	4	1.91236	0	0	4.1	1.91236	0	0	4.2	1.93163	0	0	3	1.93163	0	0	3.1	1.93163	0	0	3.2	1.9238	0	0	2	1.9238	0	0	2.1	1.9238	0	0	2.2	1.93976	0	0	1	1.93976	0	0	1.1	1.93976	0	0	1.2	1.93558
	1.91687	0	0	4	1.91687	0	0	4.1	1.91687	0	0	4.2	1.93614	0	0	3	1.93614	0	0	3.1	1.93614	0	0	3.2	1.93009	0	0	2	1.93009	0	0	2.1	1.93009	0	0	2.2	1.94427	0	0	1	1.94427	0	0	1.1	1.94427	0	0	1.2	1.94009
	1.91836	0	0	4	1.91836	0	0	4.1	1.91836	0	0	4.2	1.93763	0	0	3	1.93763	0	0	3.1	1.93763	0	0	3.2	1.93158	0	0	2	1.93158	0	0	2.1	1.93158	0	0	2.2	1.94577	0	0	1	1.94577	0	0	1.1	1.94577	0	0	1.2	1.94157
	1.91984	0	0	4	1.91984	0	0	4.1	1.91984	0	0	4.2	1.93911	0	0	3	1.93911	0	0	3.1	1.93911	0	0	3.2	1.93306	0	0	2	1.93306	0	0	2.1	1.93306	0	0	2.2	1.94726	0	0	1	1.94726	0	0	1.1	1.94726	0	0	1.2	1.94306
	1.92105	0	0	4	1.92105	0	0	4.1	1.92105	0	0	4.2	1.94032	0	0	3	1.94032	0	0	3.1	1.94032	0	0	3.2	1.93427	0	0	2	1.93427	0	0	2.1	1.93427	0	0	2.2	1.94846	0	0	1	1.94846	0	0	1.1	1.94846	0	0	1.2	1.94426
	1.92556	0	0	4	1.92556	0	0	4.1	1.92556	0	0	4.2	1.94482	0	0	3	1.94482	0	0	3.1	1.94482	0	0	3.2	1.93878	0	0	2	1.93878	0	0	2.1	1.93878	0	0	2.2	1.95297	0	0	1	1.95297	0	0	1.1	1.95297	0	0	1.2	1.94877
	1.92704	0	0	4	1.92704	0	0	4.1	1.92704	0	0	4.2	1.94631	0	0	3	1.94631	0	0	3.1	1.94631	0	0	3.2	1.94026	0	0	2	1.94026	0	0	2.1	1.94026	0	0	2.2	1.95446	0	0	1	1.95446	0	0	1.1	1.95446	0	0	1.2	1.95026
	1.92853	0	0	4	1.92853	0	0	4.1	1.92853	0	0	4.2	1.94779	0	0	3	1.94779	0	0	3.1	1.94779	0	0	3.2	1.94175	0	0	2	1.94175	0	0	2.1	1.94175	0	0	2.2	1.95594	0	0	1	1.95594	0	0	1.1	1.95594	0	0	1.2	1.95174
	1.92973	0	0	4	1.92973	0	0	4.1	1.92973	0	0	4.2	1.949	0	0	3	1.949	0	0	3.1	1.949	0	0	3.2	1.94296	0	0	2	1.94296	0	0	2.1	1.94296	0	0	2.2	1.95715	0	0	1	1.95715	0	0	1.1	1.95715	0	0	1.2	1.95295
	1.93424	0	0	4	1.93424	0	0	4.1	1.93424	0	0	4.2	1.95351	0	0	3	1.95351	0	0	3.1	1.95351	0	0	3.2	1.94754	0	0	2	1.94754	0	0	2.1	1.94754	0	0	2.2	1.96166	0	0	1	1.96166	0	0	1.1	1.96166	0	0	1.2	1.95746
	1.93573	0	0	4	1.93573	0	0	4.1	1.93573	0	0	4.2	1.95499	0	0	3	1.95499	0	0	3.1	1.95499	0	0	3.2	1.94903	0	0	2	1.94903	0	0	2.1	1.94903	0	0	2.2	1.96315	0	0	1	1.96315	0	0	1.1	1.96315	0	0	1.2	1.95894
	1.93723	0	0	4	1.93723	0	0	4.1	1.93723	0	0	4.2	1.95625	0	0	3	1.95625	0	0	3.1	1.95625	0	0	3.2	1.95053	0	0	2	1.95053	0	0	2.1	1.95053	0	0	2.2	1.96463	0	0	1	1.96463	0	0	1.1	1.96463	0	0	1.2	1.96043
	1.93844	0	0	4	1.93844	0	0	4.1	1.93844	0	0	4.2	1.95745	0	0	3	1.95745	0	0	3.1	1.95745	0	0	3.2	1.95255	0	0	2	1.95255	0	0	2.1	1.95255	0	0	2.2	1.96584	0	0	1	1.96584	0	0	1.1	1.96584	0	0	1.2	1.96163
	1.94294	0	0	4	1.94294	0	0	4.1	1.94294	0	0	4.2	1.96197	0	0	3	1.96197	0	0	3.1	1.96197	0	0	3.2	1.95706	0	0	2	1.95706	0	0	2.1	1.95706	0	0	2.2	1.97034	0	0	1	1.97034	0	0	1.1	1.97034	0	0	1.2	1.96614
	1.94443	0	0	4	1.94443	0	0	4.1	1.94443	0	0	4.2	1.96345	0	0	3	1.96345	0	0	3.1	1.96345	0	0	3.2	1.95855	0	0	2	1.95855	0	0	2.1	1.95855	0	0	2.2	1.97183	0	0	1	1.97183	0	0	1.1	1.97183	0	0	1.2	1.96763
	1.94592	0	0	4	1.94592	0	0	4.1	1.94592	0	0	4.2	1.96494	0	0	3	1.96494	0	0	3.1	1.96494	0	0	3.2	1.96003	0	0	2	1.96003	0	0	2.1	1.96003	0	0	2.2	1.97332	0	0	1	1.97332	0	0	1.1	1.97332	0	0	1.2	1.96912
	1.94713	0	0	4	1.94713	0	0	4.1	1.94713	0	0	4.2	1.96614	0	0	3	1.96614	0	0	3.1	1.96614	0	0	3.2	1.96124	0	0	2	1.96124	0	0	2.1	1.96124	0	0	2.2	1.97452	0	0	1	1.97452	0	0	1.1	1.97452	0	0	1.2	1.97032
	1.95164	0	0	4	1.95164	0	0	4.1	1.95164	0	0	4.2	1.97065	0	0	3	1.97065	0	0	3.1	1.97065	0	0	3.2	1.96575	0	0	2	1.96575	0	0	2.1	1.96575	0	0	2.2	1.97903	0	0	1	1.97903	0	0	1.1	1.97903	0	0	1.2	1.97483
	1.95312	0	0	4	1.95312	0	0	4.1	1.95312	0	0	4.2	1.97214	0	0	3	1.97214	0	0	3.1	1.97214	0	0	3.2	1.96723	0	0	2	1.96723	0	0	2.1	1.96723	0	0	2.2	1.98029	0	0	1	1.98029	0	0	1.1	1.98029	0	0	1.2	1.97632
	1.95461	0	0	4	1.95461	0	0	4.1	1.95461	0	0	4.2	1.97362	0	0	3	1.97362	0	0	3.1	1.97362	0	0	3.2	1.96872	0	0	2	1.96872	0	0	2.1	1.96872	0	0	2.2	1.98179	0	0	1	1.98179	0	0	1.1	1.98179	0	0	1.2	1.9778
	1.95581	0	0	4	1.95581	0	0	4.1	1.95581	0	0	4.2	1.97483	0	0	3	1.97483	0	0	3.1	1.97483	0	0	3.2	1.96992	0	0	2	1.96992	0	0	2.1	1.96992	0	0	2.2	1.983	0	0	1	1.983	0	0	1.1	1.983	0	0	1.2	1.97901
	1.96032	0	0	4	1.96032	0	0	4.1	1.96032	0	0	4.2	1.97934	0	0	3	1.97934	0	0	3.1	1.97934	0	0	3.2	1.97443	0	0	2	1.97443	0	0	2.1	1.97443	0	0	2.2	1.98751	0	0	1	1.98751	0	0	1.1	1.98751	0	0	1.2	1.98352
	1.96181	0	0	4	1.96181	0	0	4.1	1.96181	0	0	4.2	1.98082	0	0	3	1.98082	0	0	3.1	1.98082	0	0	3.2	1.97592	0	0	2	1.97592	0	0	2.1	1.97592	0	0	2.2	1.98899	0	0	1	1.98899	0	0	1.1	1.98899	0	0	1.2	1.98488
	1.96329	0	0	4	1.96329	0	0	4.1	1.96329	0	0	4.2	1.98231	0	0	3	1.98231	0	0	3.1	1.98231	0	0	3.2	1.9774	0	0	2	1.9774	0	0	2.1	1.9774	0	0	2.2	1.99048	0	0	1	1.99048	0	0	1.1	1.99048	0	0	1.2	1.98636
	1.9645	0	0	4	1.9645	0	0	4.1	1.9645	0	0	4.2	1.98351	0	0	3	1.98351	0	0	3.1	1.98351	0	0	3.2	1.97861	0	0	2	1.97861	0	0	2.1	1.97861	0	0	2.2	1.99168	0	0	1	1.99168	0	0	1.1	1.99168	0	0	1.2	1.98757
	1.969	0	0	4	1.969	0	0	4.1	1.969	0	0	4.2	1.98802	0	0	3	1.98802	0	0	3.1	1.98802	0	0	3.2	1.98312	0	0	2	1.98312	0	0	2.1	1.98312	0	0	2.2	1.99619	0	0	1	1.99619	0	0	1.1	1.99619	0	0	1.2	1.99208
	1.97049	0	0	4	1.97049	0	0	4.1	1.97049	0	0	4.2	1.98951	0	0	3	1.98951	0	0	3.1	1.98951	0	0	3.2	1.9846	0	0	2	1.9846	0	0	2.1	1.9846	0	0	2.2	1.99768	0	0	1	1.99768	0	0	1.1	1.99768	0	0	1.2	1.99356
	1.97198	0	0	4	1.97198	0	0	4.1	1.97198	0	0	4.2	1.99099	0	0	3	1.99099	0	0	3.1	1.99099	0	0	3.2	1.98609	0	0	2	1.98609	0	0	2.1	1.98609	0	0	2.2	1.99916	0	0	1	1.99916	0	0	1.1	1.99916	0	0	1.2	1.99505
	1.97318	0	0	4	1.97318	0	0	4.1	1.97318	0	0	4.2	1.9922	0	0	3	1.9922	0	0	3.1	1.9922	0	0	3.2	1.9873	0	0	2	1.9873	0	0	2.1	1.9873	0	0	2.2	2.00037	0	0	1	2.00037	0	0	1.1	2.00037	0	0	1.2	1.99625
	1.97769	0	0	4	1.97769	0	0	4.1	1.97769	0	0	4.2	1.99671	0	0	3	1.99671	0	0	3.1	1.99671	0	0	3.2	1.99181	0	0	2	1.99181	0	0	2.1	1.99181	0	0	2.2	2.00488	0	0	1	2.00488	0	0	1.1	2.00488	0	0	1.2	2.00076
	1.97918	0	0	4	1.97918	0	0	4.1	1.97918	0	0	4.2	1.99819	0	0	3	1.99819	0	0	3.1	1.99819	0	0	3.2	1.99329	0	0	2	1.99329	0	0	2.1	1.99329	0	0	2.2	2.00636	0	0	1	2.00636	0	0	1.1	2.00636	0	0	1.2	2.00225
	1.98066	0	0	4	1.98066	0	0	4.1	1.98066	0	0	4.2	1.99968	0	0	3	1.99968	0	0	3.1	1.99968	0	0	3.2	1.99478	0	0	2	1.99478	0	0	2.1	1.99478	0	0	2.2	2.00785	0	0	1	2.00785	0	0	1.1	2.00785	0	0	1.2	2.00373
	1.98187	0	0	4	1.98187	0	0	4.1	1.98187	0	0	4.2	2.00089	0	0	3	2.00089	0	0	3.1	2.00089	0	0	3.2	1.99598	0	0	2	1.99598	0	0	2.1	1.99598	0	0	2.2	2.00989	0	0	1	2.00989	0	0	1.1	2.00989	0	0	1.2	2.00494
	1.98638	0	0	4	1.98638	0	0	4.1	1.98638	0	0	4.2	2.00562	0	0	3	2.00562	0	0	3.1	2.00562	0	0	3.2	2.00072	0	0	2	2.00072	0	0	2.1	2.00072	0	0	2.2	2.01451	0	0	1	2.01451	0	0	1.1	2.01451	0	0	1.2	2.00945
	1.98786	0	0	4	1.98786	0	0	4.1	1.98786	0	0	4.2	2.00711	0	0	3	2.00711	0	0	3.1	2.00711	0	0	3.2	2.0022	0	0	2	2.0022	0	0	2.1	2.0022	0	0	2.2	2.016	0	0	1	2.016	0	0	1.1	2.016	0	0	1.2	2.01093
	1.98935	0	0	4	1.98935	0	0	4.1	1.98935	0	0	4.2	2.0086	0	0	3	2.0086	0	0	3.1	2.0086	0	0	3.2	2.00369	0	0	2	2.00369	0	0	2.1	2.00369	0	0	2.2	2.01749	0	0	1	2.01749	0	0	1.1	2.01749	0	0	1.2	2.01242
	1.99055	0	0	4	1.99055	0	0	4.1	1.99055	0	0	4.2	2.01062	0	0	3	2.01062	0	0	3.1	2.01062	0	0	3.2	2.00571	0	0	2	2.00571	0	0	2.1	2.00571	0	0	2.2	2.01869	0	0	1	2.01869	0	0	1.1	2.01869	0	0	1.2	2.01362
	1.99506	0	0	4	1.99506	0	0	4.1	1.99506	0	0	4.2	2.01726	0	0	3	2.01726	0	0	3.1	2.01726	0	0	3.2	2.01022	0	0	2	2.01022	0	0	2.1	2.01022	0	0	2.2	2.02335	0	0	1	2.02335	0	0	1.1	2.02335	0	0	1.2	2.01813
	1.99655	0	0	4	1.99655	0	0	4.1	1.99655	0	0	4.2	2.01875	0	0	3	2.01875	0	0	3.1	2.01875	0	0	3.2	2.01171	0	0	2	2.01171	0	0	2.1	2.01171	0	0	2.2	2.02483	0	0	1	2.02483	0	0	1.1	2.02483	0	0	1.2	2.01962
	1.99804	0	0	4	1.99804	0	0	4.1	1.99804	0	0	4.2	2.02024	0	0	3	2.02024	0	0	3.1	2.02024	0	0	3.2	2.01321	0	0	2	2.01321	0	0	2.1	2.01321	0	0	2.2	2.02632	0	0	1	2.02632	0	0	1.1	2.02632	0	0	1.2	2.02111
	1.99924	0	0	4	1.99924	0	0	4.1	1.99924	0	0	4.2	2.02144	0	0	3	2.02144	0	0	3.1	2.02144	0	0	3.2	2.01442	0	0	2	2.01442	0	0	2.1	2.01442	0	0	2.2	2.02835	0	0	1	2.02835	0	0	1.1	2.02835	0	0	1.2	2.02231
	2.00375	0	0	4	2.00375	0	0	4.1	2.00375	0	0	4.2	2.02618	0	0	3	2.02618	0	0	3.1	2.02618	0	0	3.2	2.01892	0	0	2	2.01892	0	0	2.1	2.01892	0	0	2.2	2.03309	0	0	1	2.03309	0	0	1.1	2.03309	0	0	1.2	2.02682
	2.00525	0	0	4	2.00525	0	0	4.1	2.00525	0	0	4.2	2.02767	0	0	3	2.02767	0	0	3.1	2.02767	0	0	3.2	2.02041	0	0	2	2.02041	0	0	2.1	2.02041	0	0	2.2	2.03458	0	0	1	2.03458	0	0	1.1	2.03458	0	0	1.2	2.02831
	2.00674	0	0	4	2.00674	0	0	4.1	2.00674	0	0	4.2	2.02915	0	0	3	2.02915	0	0	3.1	2.02915	0	0	3.2	2.02189	0	0	2	2.02189	0	0	2.1	2.02189	0	0	2.2	2.03606	0	0	1	2.03606	0	0	1.1	2.03606	0	0	1.2	2.02979
	2.00794	0	0	4	2.00794	0	0	4.1	2.00794	0	0	4.2	2.03118	0	0	3	2.03118	0	0	3.1	2.03118	0	0	3.2	2.0231	0	0	2	2.0231	0	0	2.1	2.0231	0	0	2.2	2.03811	0	0	1	2.03811	0	0	1.1	2.03811	0	0	1.2	2.031
	2.01466	0	0	4	2.01466	0	0	4.1	2.01466	0	0	4.2	2.03569	0	0	3	2.03569	0	0	3.1	2.03569	0	0	3.2	2.02761	0	0	2	2.02761	0	0	2.1	2.02761	0	0	2.2	2.04285	0	0	1	2.04285	0	0	1.1	2.04285	0	0	1.2	2.03551
	2.01615	0	0	4	2.01615	0	0	4.1	2.01615	0	0	4.2	2.03718	0	0	3	2.03718	0	0	3.1	2.03718	0	0	3.2	2.0291	0	0	2	2.0291	0	0	2.1	2.0291	0	0	2.2	2.04433	0	0	1	2.04433	0	0	1.1	2.04433	0	0	1.2	2.03699
	2.01763	0	0	4	2.01763	0	0	4.1	2.01763	0	0	4.2	2.03867	0	0	3	2.03867	0	0	3.1	2.03867	0	0	3.2	2.03058	0	0	2	2.03058	0	0	2.1	2.03058	0	0	2.2	2.04582	0	0	1	2.04582	0	0	1.1	2.04582	0	0	1.2	2.03848
	2.01884	0	0	4	2.01884	0	0	4.1	2.01884	0	0	4.2	2.03987	0	0	3	2.03987	0	0	3.1	2.03987	0	0	3.2	2.03179	0	0	2	2.03179	0	0	2.1	2.03179	0	0	2.2	2.04785	0	0	1	2.04785	0	0	1.1	2.04785	0	0	1.2	2.03968
	2.02335	0	0	4	2.02335	0	0	4.1	2.02335	0	0	4.2	2.04438	0	0	3	2.04438	0	0	3.1	2.04438	0	0	3.2	2.0363	0	0	2	2.0363	0	0	2.1	2.0363	0	0	2.2	2.05236	0	0	1	2.05236	0	0	1.1	2.05236	0	0	1.2	2.04419
	2.02483	0	0	4	2.02483	0	0	4.1	2.02483	0	0	4.2	2.04587	0	0	3	2.04587	0	0	3.1	2.04587	0	0	3.2	2.03778	0	0	2	2.03778	0	0	2.1	2.03778	0	0	2.2	2.05385	0	0	1	2.05385	0	0	1.1	2.05385	0	0	1.2	2.04568
	2.02632	0	0	4	2.02632	0	0	4.1	2.02632	0	0	4.2	2.04735	0	0	3	2.04735	0	0	3.1	2.04735	0	0	3.2	2.03927	0	0	2	2.03927	0	0	2.1	2.03927	0	0	2.2	2.05533	0	0	1	2.05533	0	0	1.1	2.05533	0	0	1.2	2.04717
	2.02752	0	0	4	2.02752	0	0	4.1	2.02752	0	0	4.2	2.04856	0	0	3	2.04856	0	0	3.1	2.04856	0	0	3.2	2.04048	0	0	2	2.04048	0	0	2.1	2.04048	0	0	2.2	2.05654	0	0	1	2.05654	0	0	1.1	2.05654	0	0	1.2	2.04837
	2.03203	0	0	4	2.03203	0	0	4.1	2.03203	0	0	4.2	2.05307	0	0	3	2.05307	0	0	3.1	2.05307	0	0	3.2	2.04498	0	0	2	2.04498	0	0	2.1	2.04498	0	0	2.2	2.06105	0	0	1	2.06105	0	0	1.1	2.06105	0	0	1.2	2.05288
	2.03352	0	0	4	2.03352	0	0	4.1	2.03352	0	0	4.2	2.05455	0	0	3	2.05455	0	0	3.1	2.05455	0	0	3.2	2.04647	0	0	2	2.04647	0	0	2.1	2.04647	0	0	2.2	2.06253	0	0	1	2.06253	0	0	1.1	2.06253	0	0	1.2	2.05437
	2.035	0	0	4	2.035	0	0	4.1	2.035	0	0	4.2	2.05604	0	0	3	2.05604	0	0	3.1	2.05604	0	0	3.2	2.04795	0	0	2	2.04795	0	0	2.1	2.04795	0	0	2.2	2.06402	0	0	1	2.06402	0	0	1.1	2.06402	0	0	1.2	2.05585
	2.03621	0	0	4	2.03621	0	0	4.1	2.03621	0	0	4.2	2.05724	0	0	3	2.05724	0	0	3.1	2.05724	0	0	3.2	2.04916	0	0	2	2.04916	0	0	2.1	2.04916	0	0	2.2	2.06522	0	0	1	2.06522	0	0	1.1	2.06522	0	0	1.2	2.05706
	2.04095	0	0	4	2.04095	0	0	4.1	2.04095	0	0	4.2	2.06175	0	0	3	2.06175	0	0	3.1	2.06175	0	0	3.2	2.05367	0	0	2	2.05367	0	0	2.1	2.05367	0	0	2.2	2.06973	0	0	1	2.06973	0	0	1.1	2.06973	0	0	1.2	2.06157
	2.04243	0	0	4	2.04243	0	0	4.1	2.04243	0	0	4.2	2.06324	0	0	3	2.06324	0	0	3.1	2.06324	0	0	3.2	2.05515	0	0	2	2.05515	0	0	2.1	2.05515	0	0	2.2	2.07122	0	0	1	2.07122	0	0	1.1	2.07122	0	0	1.2	2.06305
	2.04394	0	0	4	2.04394	0	0	4.1	2.04394	0	0	4.2	2.06473	0	0	3	2.06473	0	0	3.1	2.06473	0	0	3.2	2.05664	0	0	2	2.05664	0	0	2.1	2.05664	0	0	2.2	2.07271	0	0	1	2.07271	0	0	1.1	2.07271	0	0	1.2	2.06454
	2.04597	0	0	4	2.04597	0	0	4.1	2.04597	0	0	4.2	2.06593	0	0	3	2.06593	0	0	3.1	2.06593	0	0	3.2	2.05785	0	0	2	2.05785	0	0	2.1	2.05785	0	0	2.2	2.07391	0	0	1	2.07391	0	0	1.1	2.07391	0	0	1.2	2.06574
	2.05048	0	0	4	2.05048	0	0	4.1	2.05048	0	0	4.2	2.07044	0	0	3	2.07044	0	0	3.1	2.07044	0	0	3.2	2.06236	0	0	2	2.06236	0	0	2.1	2.06236	0	0	2.2	2.07842	0	0	1	2.07842	0	0	1.1	2.07842	0	0	1.2	2.07025
	2.05197	0	0	4	2.05197	0	0	4.1	2.05197	0	0	4.2	2.07195	0	0	3	2.07195	0	0	3.1	2.07195	0	0	3.2	2.06385	0	0	2	2.06385	0	0	2.1	2.06385	0	0	2.2	2.07991	0	0	1	2.07991	0	0	1.1	2.07991	0	0	1.2	2.07174
	2.05345	0	0	4	2.05345	0	0	4.1	2.05345	0	0	4.2	2.07344	0	0	3	2.07344	0	0	3.1	2.07344	0	0	3.2	2.06534	0	0	2	2.06534	0	0	2.1	2.06534	0	0	2.2	2.08139	0	0	1	2.08139	0	0	1.1	2.08139	0	0	1.2	2.07323
	2.05466	0	0	4	2.05466	0	0	4.1	2.05466	0	0	4.2	2.07464	0	0	3	2.07464	0	0	3.1	2.07464	0	0	3.2	2.06655	0	0	2	2.06655	0	0	2.1	2.06655	0	0	2.2	2.0826	0	0	1	2.0826	0	0	1.1	2.0826	0	0	1.2	2.07443
	2.05917	0	0	4	2.05917	0	0	4.1	2.05917	0	0	4.2	2.07915	0	0	3	2.07915	0	0	3.1	2.07915	0	0	3.2	2.07106	0	0	2	2.07106	0	0	2.1	2.07106	0	0	2.2	2.08711	0	0	1	2.08711	0	0	1.1	2.08711	0	0	1.2	2.07894
	2.06065	0	0	4	2.06065	0	0	4.1	2.06065	0	0	4.2	2.08064	0	0	3	2.08064	0	0	3.1	2.08064	0	0	3.2	2.07255	0	0	2	2.07255	0	0	2.1	2.07255	0	0	2.2	2.08859	0	0	1	2.08859	0	0	1.1	2.08859	0	0	1.2	2.08043
	2.06214	0	0	4	2.06214	0	0	4.1	2.06214	0	0	4.2	2.08212	0	0	3	2.08212	0	0	3.1	2.08212	0	0	3.2	2.07403	0	0	2	2.07403	0	0	2.1	2.07403	0	0	2.2	2.09008	0	0	1	2.09008	0	0	1.1	2.09008	0	0	1.2	2.08168
	2.06334	0	0	4	2.06334	0	0	4.1	2.06334	0	0	4.2	2.08333	0	0	3	2.08333	0	0	3.1	2.08333	0	0	3.2	2.07524	0	0	2	2.07524	0	0	2.1	2.07524	0	0	2.2	2.09129	0	0	1	2.09129	0	0	1.1	2.09129	0	0	1.2	2.08289
	2.06785	0	0	4	2.06785	0	0	4.1	2.06785	0	0	4.2	2.08784	0	0	3	2.08784	0	0	3.1	2.08784	0	0	3.2	2.07975	0	0	2	2.07975	0	0	2.1	2.07975	0	0	2.2	2.09579	0	0	1	2.09579	0	0	1.1	2.09579	0	0	1.2	2.0874
	2.06934	0	0	4	2.06934	0	0	4.1	2.06934	0	0	4.2	2.08933	0	0	3	2.08933	0	0	3.1	2.08933	0	0	3.2	2.08123	0	0	2	2.08123	0	0	2.1	2.08123	0	0	2.2	2.09728	0	0	1	2.09728	0	0	1.1	2.09728	0	0	1.2	2.08888
	2.07082	0	0	4	2.07082	0	0	4.1	2.07082	0	0	4.2	2.09081	0	0	3	2.09081	0	0	3.1	2.09081	0	0	3.2	2.08272	0	0	2	2.08272	0	0	2.1	2.08272	0	0	2.2	2.09877	0	0	1	2.09877	0	0	1.1	2.09877	0	0	1.2	2.09037
	2.07203	0	0	4	2.07203	0	0	4.1	2.07203	0	0	4.2	2.09202	0	0	3	2.09202	0	0	3.1	2.09202	0	0	3.2	2.08392	0	0	2	2.08392	0	0	2.1	2.08392	0	0	2.2	2.09997	0	0	1	2.09997	0	0	1.1	2.09997	0	0	1.2	2.09157
	2.07654	0	0	4	2.07654	0	0	4.1	2.07654	0	0	4.2	2.09652	0	0	3	2.09652	0	0	3.1	2.09652	0	0	3.2	2.08843	0	0	2	2.08843	0	0	2.1	2.08843	0	0	2.2	2.10448	0	0	1	2.10448	0	0	1.1	2.10448	0	0	1.2	2.09608
	2.07802	0	0	4	2.07802	0	0	4.1	2.07802	0	0	4.2	2.09801	0	0	3	2.09801	0	0	3.1	2.09801	0	0	3.2	2.08992	0	0	2	2.08992	0	0	2.1	2.08992	0	0	2.2	2.10597	0	0	1	2.10597	0	0	1.1	2.10597	0	0	1.2	2.09736
	2.07951	0	0	4	2.07951	0	0	4.1	2.07951	0	0	4.2	2.09949	0	0	3	2.09949	0	0	3.1	2.09949	0	0	3.2	2.0914	0	0	2	2.0914	0	0	2.1	2.0914	0	0	2.2	2.10746	0	0	1	2.10746	0	0	1.1	2.10746	0	0	1.2	2.09884
	2.08071	0	0	4	2.08071	0	0	4.1	2.08071	0	0	4.2	2.1007	0	0	3	2.1007	0	0	3.1	2.1007	0	0	3.2	2.09261	0	0	2	2.09261	0	0	2.1	2.09261	0	0	2.2	2.10866	0	0	1	2.10866	0	0	1.1	2.10866	0	0	1.2	2.10005
	2.08522	0	0	4	2.08522	0	0	4.1	2.08522	0	0	4.2	2.10521	0	0	3	2.10521	0	0	3.1	2.10521	0	0	3.2	2.09722	0	0	2	2.09722	0	0	2.1	2.09722	0	0	2.2	2.11317	0	0	1	2.11317	0	0	1.1	2.11317	0	0	1.2	2.10456
	2.08671	0	0	4	2.08671	0	0	4.1	2.08671	0	0	4.2	2.10669	0	0	3	2.10669	0	0	3.1	2.10669	0	0	3.2	2.09871	0	0	2	2.09871	0	0	2.1	2.09871	0	0	2.2	2.11466	0	0	1	2.11466	0	0	1.1	2.11466	0	0	1.2	2.10604
	2.08819	0	0	4	2.08819	0	0	4.1	2.08819	0	0	4.2	2.10818	0	0	3	2.10818	0	0	3.1	2.10818	0	0	3.2	2.1002	0	0	2	2.1002	0	0	2.1	2.1002	0	0	2.2	2.11614	0	0	1	2.11614	0	0	1.1	2.11614	0	0	1.2	2.10753
	2.0894	0	0	4	2.0894	0	0	4.1	2.0894	0	0	4.2	2.10938	0	0	3	2.10938	0	0	3.1	2.10938	0	0	3.2	2.1014	0	0	2	2.1014	0	0	2.1	2.1014	0	0	2.2	2.11735	0	0	1	2.11735	0	0	1.1	2.11735	0	0	1.2	2.10873
	2.09391	0	0	4	2.09391	0	0	4.1	2.09391	0	0	4.2	2.11389	0	0	3	2.11389	0	0	3.1	2.11389	0	0	3.2	2.10614	0	0	2	2.10614	0	0	2.1	2.10614	0	0	2.2	2.12186	0	0	1	2.12186	0	0	1.1	2.12186	0	0	1.2	2.11324
	2.0954	0	0	4	2.0954	0	0	4.1	2.0954	0	0	4.2	2.11538	0	0	3	2.11538	0	0	3.1	2.11538	0	0	3.2	2.10763	0	0	2	2.10763	0	0	2.1	2.10763	0	0	2.2	2.12334	0	0	1	2.12334	0	0	1.1	2.12334	0	0	1.2	2.11473
	2.09688	0	0	4	2.09688	0	0	4.1	2.09688	0	0	4.2	2.11686	0	0	3	2.11686	0	0	3.1	2.11686	0	0	3.2	2.10911	0	0	2	2.10911	0	0	2.1	2.10911	0	0	2.2	2.12483	0	0	1	2.12483	0	0	1.1	2.12483	0	0	1.2	2.11621
	2.09809	0	0	4	2.09809	0	0	4.1	2.09809	0	0	4.2	2.11807	0	0	3	2.11807	0	0	3.1	2.11807	0	0	3.2	2.11116	0	0	2	2.11116	0	0	2.1	2.11116	0	0	2.2	2.12603	0	0	1	2.12603	0	0	1.1	2.12603	0	0	1.2	2.11742
	2.1026	0	0	4	2.1026	0	0	4.1	2.1026	0	0	4.2	2.12258	0	0	3	2.12258	0	0	3.1	2.12258	0	0	3.2	2.11567	0	0	2	2.11567	0	0	2.1	2.11567	0	0	2.2	2.13054	0	0	1	2.13054	0	0	1.1	2.13054	0	0	1.2	2.12193
	2.10408	0	0	4	2.10408	0	0	4.1	2.10408	0	0	4.2	2.12406	0	0	3	2.12406	0	0	3.1	2.12406	0	0	3.2	2.11715	0	0	2	2.11715	0	0	2.1	2.11715	0	0	2.2	2.13203	0	0	1	2.13203	0	0	1.1	2.13203	0	0	1.2	2.12341
	2.10557	0	0	4	2.10557	0	0	4.1	2.10557	0	0	4.2	2.12532	0	0	3	2.12532	0	0	3.1	2.12532	0	0	3.2	2.11864	0	0	2	2.11864	0	0	2.1	2.11864	0	0	2.2	2.13351	0	0	1	2.13351	0	0	1.1	2.13351	0	0	1.2	2.1249
	2.10678	0	0	4	2.10678	0	0	4.1	2.10678	0	0	4.2	2.12653	0	0	3	2.12653	0	0	3.1	2.12653	0	0	3.2	2.11984	0	0	2	2.11984	0	0	2.1	2.11984	0	0	2.2	2.13472	0	0	1	2.13472	0	0	1.1	2.13472	0	0	1.2	2.1261
	2.11152	0	0	4	2.11152	0	0	4.1	2.11152	0	0	4.2	2.13104	0	0	3	2.13104	0	0	3.1	2.13104	0	0	3.2	2.12435	0	0	2	2.12435	0	0	2.1	2.12435	0	0	2.2	2.13923	0	0	1	2.13923	0	0	1.1	2.13923	0	0	1.2	2.13061
	2.113	0	0	4	2.113	0	0	4.1	2.113	0	0	4.2	2.13252	0	0	3	2.13252	0	0	3.1	2.13252	0	0	3.2	2.12584	0	0	2	2.12584	0	0	2.1	2.12584	0	0	2.2	2.14048	0	0	1	2.14048	0	0	1.1	2.14048	0	0	1.2	2.1321
	2.11448	0	0	4	2.11448	0	0	4.1	2.11448	0	0	4.2	2.13401	0	0	3	2.13401	0	0	3.1	2.13401	0	0	3.2	2.12733	0	0	2	2.12733	0	0	2.1	2.12733	0	0	2.2	2.14197	0	0	1	2.14197	0	0	1.1	2.14197	0	0	1.2	2.13358
	2.11653	0	0	4	2.11653	0	0	4.1	2.11653	0	0	4.2	2.13521	0	0	3	2.13521	0	0	3.1	2.13521	0	0	3.2	2.12935	0	0	2	2.12935	0	0	2.1	2.12935	0	0	2.2	2.14317	0	0	1	2.14317	0	0	1.1	2.14317	0	0	1.2	2.13479
	2.12104	0	0	4	2.12104	0	0	4.1	2.12104	0	0	4.2	2.13972	0	0	3	2.13972	0	0	3.1	2.13972	0	0	3.2	2.13386	0	0	2	2.13386	0	0	2.1	2.13386	0	0	2.2	2.14791	0	0	1	2.14791	0	0	1.1	2.14791	0	0	1.2	2.13929
	2.12252	0	0	4	2.12252	0	0	4.1	2.12252	0	0	4.2	2.14121	0	0	3	2.14121	0	0	3.1	2.14121	0	0	3.2	2.13535	0	0	2	2.13535	0	0	2.1	2.13535	0	0	2.2	2.1494	0	0	1	2.1494	0	0	1.1	2.1494	0	0	1.2	2.14078
	2.12401	0	0	4	2.12401	0	0	4.1	2.12401	0	0	4.2	2.14269	0	0	3	2.14269	0	0	3.1	2.14269	0	0	3.2	2.13683	0	0	2	2.13683	0	0	2.1	2.13683	0	0	2.2	2.15088	0	0	1	2.15088	0	0	1.1	2.15088	0	0	1.2	2.14227
	2.12521	0	0	4	2.12521	0	0	4.1	2.12521	0	0	4.2	2.1439	0	0	3	2.1439	0	0	3.1	2.1439	0	0	3.2	2.13804	0	0	2	2.13804	0	0	2.1	2.13804	0	0	2.2	2.15292	0	0	1	2.15292	0	0	1.1	2.15292	0	0	1.2	2.14347
	2.12972	0	0	4	2.12972	0	0	4.1	2.12972	0	0	4.2	2.1484	0	0	3	2.1484	0	0	3.1	2.1484	0	0	3.2	2.14255	0	0	2	2.14255	0	0	2.1	2.14255	0	0	2.2	2.15743	0	0	1	2.15743	0	0	1.1	2.15743	0	0	1.2	2.14798
	2.1312	0	0	4	2.1312	0	0	4.1	2.1312	0	0	4.2	2.14989	0	0	3	2.14989	0	0	3.1	2.14989	0	0	3.2	2.14403	0	0	2	2.14403	0	0	2.1	2.14403	0	0	2.2	2.15892	0	0	1	2.15892	0	0	1.1	2.15892	0	0	1.2	2.14947
	2.13269	0	0	4	2.13269	0	0	4.1	2.13269	0	0	4.2	2.15138	0	0	3	2.15138	0	0	3.1	2.15138	0	0	3.2	2.14552	0	0	2	2.14552	0	0	2.1	2.14552	0	0	2.2	2.16041	0	0	1	2.16041	0	0	1.1	2.16041	0	0	1.2	2.15095
	2.1339	0	0	4	2.1339	0	0	4.1	2.1339	0	0	4.2	2.15258	0	0	3	2.15258	0	0	3.1	2.15258	0	0	3.2	2.14673	0	0	2	2.14673	0	0	2.1	2.14673	0	0	2.2	2.16244	0	0	1	2.16244	0	0	1.1	2.16244	0	0	1.2	2.15216
	2.13863	0	0	4	2.13863	0	0	4.1	2.13863	0	0	4.2	2.15709	0	0	3	2.15709	0	0	3.1	2.15709	0	0	3.2	2.15123	0	0	2	2.15123	0	0	2.1	2.15123	0	0	2.2	2.16695	0	0	1	2.16695	0	0	1.1	2.16695	0	0	1.2	2.15667
	2.14012	0	0	4	2.14012	0	0	4.1	2.14012	0	0	4.2	2.15858	0	0	3	2.15858	0	0	3.1	2.15858	0	0	3.2	2.15272	0	0	2	2.15272	0	0	2.1	2.15272	0	0	2.2	2.16845	0	0	1	2.16845	0	0	1.1	2.16845	0	0	1.2	2.15816
	2.14161	0	0	4	2.14161	0	0	4.1	2.14161	0	0	4.2	2.16007	0	0	3	2.16007	0	0	3.1	2.16007	0	0	3.2	2.15421	0	0	2	2.15421	0	0	2.1	2.15421	0	0	2.2	2.16994	0	0	1	2.16994	0	0	1.1	2.16994	0	0	1.2	2.15964
	2.14364	0	0	4	2.14364	0	0	4.1	2.14364	0	0	4.2	2.16128	0	0	3	2.16128	0	0	3.1	2.16128	0	0	3.2	2.15541	0	0	2	2.15541	0	0	2.1	2.15541	0	0	2.2	2.17114	0	0	1	2.17114	0	0	1.1	2.17114	0	0	1.2	2.16085
	2.14815	0	0	4	2.14815	0	0	4.1	2.14815	0	0	4.2	2.16601	0	0	3	2.16601	0	0	3.1	2.16601	0	0	3.2	2.16015	0	0	2	2.16015	0	0	2.1	2.16015	0	0	2.2	2.17576	0	0	1	2.17576	0	0	1.1	2.17576	0	0	1.2	2.16536
	2.14963	0	0	4	2.14963	0	0	4.1	2.14963	0	0	4.2	2.1675	0	0	3	2.1675	0	0	3.1	2.1675	0	0	3.2	2.16164	0	0	2	2.16164	0	0	2.1	2.16164	0	0	2.2	2.17725	0	0	1	2.17725	0	0	1.1	2.17725	0	0	1.2	2.16684
	2.15112	0	0	4	2.15112	0	0	4.1	2.15112	0	0	4.2	2.16899	0	0	3	2.16899	0	0	3.1	2.16899	0	0	3.2	2.16312	0	0	2	2.16312	0	0	2.1	2.16312	0	0	2.2	2.17873	0	0	1	2.17873	0	0	1.1	2.17873	0	0	1.2	2.16833
	2.15232	0	0	4	2.15232	0	0	4.1	2.15232	0	0	4.2	2.17102	0	0	3	2.17102	0	0	3.1	2.17102	0	0	3.2	2.16517	0	0	2	2.16517	0	0	2.1	2.16517	0	0	2.2	2.17994	0	0	1	2.17994	0	0	1.1	2.17994	0	0	1.2	2.16953
	2.15683	0	0	4	2.15683	0	0	4.1	2.15683	0	0	4.2	2.17765	0	0	3	2.17765	0	0	3.1	2.17765	0	0	3.2	2.16968	0	0	2	2.16968	0	0	2.1	2.16968	0	0	2.2	2.18468	0	0	1	2.18468	0	0	1.1	2.18468	0	0	1.2	2.17427
	2.15832	0	0	4	2.15832	0	0	4.1	2.15832	0	0	4.2	2.17914	0	0	3	2.17914	0	0	3.1	2.17914	0	0	3.2	2.17116	0	0	2	2.17116	0	0	2.1	2.17116	0	0	2.2	2.18616	0	0	1	2.18616	0	0	1.1	2.18616	0	0	1.2	2.17576
	2.15967	0	0	4	2.15967	0	0	4.1	2.15967	0	0	4.2	2.18062	0	0	3	2.18062	0	0	3.1	2.18062	0	0	3.2	2.17265	0	0	2	2.17265	0	0	2.1	2.17265	0	0	2.2	2.18765	0	0	1	2.18765	0	0	1.1	2.18765	0	0	1.2	2.17724
	2.16088	0	0	4	2.16088	0	0	4.1	2.16088	0	0	4.2	2.18183	0	0	3	2.18183	0	0	3.1	2.18183	0	0	3.2	2.17385	0	0	2	2.17385	0	0	2.1	2.17385	0	0	2.2	2.18968	0	0	1	2.18968	0	0	1.1	2.18968	0	0	1.2	2.17924
	2.16538	0	0	4	2.16538	0	0	4.1	2.16538	0	0	4.2	2.18634	0	0	3	2.18634	0	0	3.1	2.18634	0	0	3.2	2.17836	0	0	2	2.17836	0	0	2.1	2.17836	0	0	2.2	2.19442	0	0	1	2.19442	0	0	1.1	2.19442	0	0	1.2	2.18375
	2.16687	0	0	4	2.16687	0	0	4.1	2.16687	0	0	4.2	2.18782	0	0	3	2.18782	0	0	3.1	2.18782	0	0	3.2	2.17986	0	0	2	2.17986	0	0	2.1	2.17986	0	0	2.2	2.1959	0	0	1	2.1959	0	0	1.1	2.1959	0	0	1.2	2.18523
	2.16835	0	0	4	2.16835	0	0	4.1	2.16835	0	0	4.2	2.18931	0	0	3	2.18931	0	0	3.1	2.18931	0	0	3.2	2.18134	0	0	2	2.18134	0	0	2.1	2.18134	0	0	2.2	2.19739	0	0	1	2.19739	0	0	1.1	2.19739	0	0	1.2	2.18672
	2.16956	0	0	4	2.16956	0	0	4.1	2.16956	0	0	4.2	2.19051	0	0	3	2.19051	0	0	3.1	2.19051	0	0	3.2	2.18255	0	0	2	2.18255	0	0	2.1	2.18255	0	0	2.2	2.19942	0	0	1	2.19942	0	0	1.1	2.19942	0	0	1.2	2.18793
	2.17407	0	0	4	2.17407	0	0	4.1	2.17407	0	0	4.2	2.19511	0	0	3	2.19511	0	0	3.1	2.19511	0	0	3.2	2.18706	0	0	2	2.18706	0	0	2.1	2.18706	0	0	2.2	2.20416	0	0	1	2.20416	0	0	1.1	2.20416	0	0	1.2	2.19243
	2.17556	0	0	4	2.17556	0	0	4.1	2.17556	0	0	4.2	2.1966	0	0	3	2.1966	0	0	3.1	2.1966	0	0	3.2	2.18855	0	0	2	2.18855	0	0	2.1	2.18855	0	0	2.2	2.20565	0	0	1	2.20565	0	0	1.1	2.20565	0	0	1.2	2.19392
	2.17704	0	0	4	2.17704	0	0	4.1	2.17704	0	0	4.2	2.19809	0	0	3	2.19809	0	0	3.1	2.19809	0	0	3.2	2.19003	0	0	2	2.19003	0	0	2.1	2.19003	0	0	2.2	2.20715	0	0	1	2.20715	0	0	1.1	2.20715	0	0	1.2	2.1954
	2.17825	0	0	4	2.17825	0	0	4.1	2.17825	0	0	4.2	2.20012	0	0	3	2.20012	0	0	3.1	2.20012	0	0	3.2	2.19209	0	0	2	2.19209	0	0	2.1	2.19209	0	0	2.2	2.20918	0	0	1	2.20918	0	0	1.1	2.20918	0	0	1.2	2.19661
	2.18286	0	0	4	2.18286	0	0	4.1	2.18286	0	0	4.2	2.20463	0	0	3	2.20463	0	0	3.1	2.20463	0	0	3.2	2.19659	0	0	2	2.19659	0	0	2.1	2.19659	0	0	2.2	2.21369	0	0	1	2.21369	0	0	1.1	2.21369	0	0	1.2	2.20112
	2.18435	0	0	4	2.18435	0	0	4.1	2.18435	0	0	4.2	2.20612	0	0	3	2.20612	0	0	3.1	2.20612	0	0	3.2	2.19808	0	0	2	2.19808	0	0	2.1	2.19808	0	0	2.2	2.21518	0	0	1	2.21518	0	0	1.1	2.21518	0	0	1.2	2.2026
	2.18583	0	0	4	2.18583	0	0	4.1	2.18583	0	0	4.2	2.2076	0	0	3	2.2076	0	0	3.1	2.2076	0	0	3.2	2.19957	0	0	2	2.19957	0	0	2.1	2.19957	0	0	2.2	2.21666	0	0	1	2.21666	0	0	1.1	2.21666	0	0	1.2	2.20409
	2.18704	0	0	4	2.18704	0	0	4.1	2.18704	0	0	4.2	2.20881	0	0	3	2.20881	0	0	3.1	2.20881	0	0	3.2	2.20077	0	0	2	2.20077	0	0	2.1	2.20077	0	0	2.2	2.21787	0	0	1	2.21787	0	0	1.1	2.21787	0	0	1.2	2.20529
	2.19155	0	0	4	2.19155	0	0	4.1	2.19155	0	0	4.2	2.21332	0	0	3	2.21332	0	0	3.1	2.21332	0	0	3.2	2.20551	0	0	2	2.20551	0	0	2.1	2.20551	0	0	2.2	2.22238	0	0	1	2.22238	0	0	1.1	2.22238	0	0	1.2	2.2098
	2.19303	0	0	4	2.19303	0	0	4.1	2.19303	0	0	4.2	2.2148	0	0	3	2.2148	0	0	3.1	2.2148	0	0	3.2	2.20699	0	0	2	2.20699	0	0	2.1	2.20699	0	0	2.2	2.22386	0	0	1	2.22386	0	0	1.1	2.22386	0	0	1.2	2.21129
	2.19452	0	0	4	2.19452	0	0	4.1	2.19452	0	0	4.2	2.21629	0	0	3	2.21629	0	0	3.1	2.21629	0	0	3.2	2.20848	0	0	2	2.20848	0	0	2.1	2.20848	0	0	2.2	2.22535	0	0	1	2.22535	0	0	1.1	2.22535	0	0	1.2	2.21278
	2.19572	0	0	4	2.19572	0	0	4.1	2.19572	0	0	4.2	2.2175	0	0	3	2.2175	0	0	3.1	2.2175	0	0	3.2	2.21052	0	0	2	2.21052	0	0	2.1	2.21052	0	0	2.2	2.22655	0	0	1	2.22655	0	0	1.1	2.22655	0	0	1.2	2.21399
	2.20023	0	0	4	2.20023	0	0	4.1	2.20023	0	0	4.2	2.222	0	0	3	2.222	0	0	3.1	2.222	0	0	3.2	2.21503	0	0	2	2.21503	0	0	2.1	2.21503	0	0	2.2	2.23106	0	0	1	2.23106	0	0	1.1	2.23106	0	0	1.2	2.2185
	2.20172	0	0	4	2.20172	0	0	4.1	2.20172	0	0	4.2	2.22349	0	0	3	2.22349	0	0	3.1	2.22349	0	0	3.2	2.21652	0	0	2	2.21652	0	0	2.1	2.21652	0	0	2.2	2.23255	0	0	1	2.23255	0	0	1.1	2.23255	0	0	1.2	2.22
	2.2032	0	0	4	2.2032	0	0	4.1	2.2032	0	0	4.2	2.22498	0	0	3	2.22498	0	0	3.1	2.22498	0	0	3.2	2.21801	0	0	2	2.21801	0	0	2.1	2.21801	0	0	2.2	2.23404	0	0	1	2.23404	0	0	1.1	2.23404	0	0	1.2	2.22148
	2.20441	0	0	4	2.20441	0	0	4.1	2.20441	0	0	4.2	2.22618	0	0	3	2.22618	0	0	3.1	2.22618	0	0	3.2	2.21921	0	0	2	2.21921	0	0	2.1	2.21921	0	0	2.2	2.23524	0	0	1	2.23524	0	0	1.1	2.23524	0	0	1.2	2.22269
	2.20914	0	0	4	2.20914	0	0	4.1	2.20914	0	0	4.2	2.23069	0	0	3	2.23069	0	0	3.1	2.23069	0	0	3.2	2.22372	0	0	2	2.22372	0	0	2.1	2.22372	0	0	2.2	2.23975	0	0	1	2.23975	0	0	1.1	2.23975	0	0	1.2	2.2272
	2.21063	0	0	4	2.21063	0	0	4.1	2.21063	0	0	4.2	2.23218	0	0	3	2.23218	0	0	3.1	2.23218	0	0	3.2	2.22523	0	0	2	2.22523	0	0	2.1	2.22523	0	0	2.2	2.24124	0	0	1	2.24124	0	0	1.1	2.24124	0	0	1.2	2.22868
	2.21212	0	0	4	2.21212	0	0	4.1	2.21212	0	0	4.2	2.23366	0	0	3	2.23366	0	0	3.1	2.23366	0	0	3.2	2.22671	0	0	2	2.22671	0	0	2.1	2.22671	0	0	2.2	2.24272	0	0	1	2.24272	0	0	1.1	2.24272	0	0	1.2	2.23017
	2.21414	0	0	4	2.21414	0	0	4.1	2.21414	0	0	4.2	2.23487	0	0	3	2.23487	0	0	3.1	2.23487	0	0	3.2	2.22792	0	0	2	2.22792	0	0	2.1	2.22792	0	0	2.2	2.24393	0	0	1	2.24393	0	0	1.1	2.24393	0	0	1.2	2.23137
	2.21865	0	0	4	2.21865	0	0	4.1	2.21865	0	0	4.2	2.23938	0	0	3	2.23938	0	0	3.1	2.23938	0	0	3.2	2.23243	0	0	2	2.23243	0	0	2.1	2.23243	0	0	2.2	2.24844	0	0	1	2.24844	0	0	1.1	2.24844	0	0	1.2	2.23588
	2.22014	0	0	4	2.22014	0	0	4.1	2.22014	0	0	4.2	2.24086	0	0	3	2.24086	0	0	3.1	2.24086	0	0	3.2	2.23391	0	0	2	2.23391	0	0	2.1	2.23391	0	0	2.2	2.24993	0	0	1	2.24993	0	0	1.1	2.24993	0	0	1.2	2.23737
	2.22163	0	0	4	2.22163	0	0	4.1	2.22163	0	0	4.2	2.24234	0	0	3	2.24234	0	0	3.1	2.24234	0	0	3.2	2.2354	0	0	2	2.2354	0	0	2.1	2.2354	0	0	2.2	2.25141	0	0	1	2.25141	0	0	1.1	2.25141	0	0	1.2	2.23885
	2.22283	0	0	4	2.22283	0	0	4.1	2.22283	0	0	4.2	2.24355	0	0	3	2.24355	0	0	3.1	2.24355	0	0	3.2	2.2366	0	0	2	2.2366	0	0	2.1	2.2366	0	0	2.2	2.25262	0	0	1	2.25262	0	0	1.1	2.25262	0	0	1.2	2.24006
	2.22734	0	0	4	2.22734	0	0	4.1	2.22734	0	0	4.2	2.24806	0	0	3	2.24806	0	0	3.1	2.24806	0	0	3.2	2.24111	0	0	2	2.24111	0	0	2.1	2.24111	0	0	2.2	2.25713	0	0	1	2.25713	0	0	1.1	2.25713	0	0	1.2	2.24457
	2.22883	0	0	4	2.22883	0	0	4.1	2.22883	0	0	4.2	2.24955	0	0	3	2.24955	0	0	3.1	2.24955	0	0	3.2	2.2426	0	0	2	2.2426	0	0	2.1	2.2426	0	0	2.2	2.25861	0	0	1	2.25861	0	0	1.1	2.25861	0	0	1.2	2.24605
	2.23031	0	0	4	2.23031	0	0	4.1	2.23031	0	0	4.2	2.25103	0	0	3	2.25103	0	0	3.1	2.25103	0	0	3.2	2.24408	0	0	2	2.24408	0	0	2.1	2.24408	0	0	2.2	2.2601	0	0	1	2.2601	0	0	1.1	2.2601	0	0	1.2	2.24731
	2.23152	0	0	4	2.23152	0	0	4.1	2.23152	0	0	4.2	2.25224	0	0	3	2.25224	0	0	3.1	2.25224	0	0	3.2	2.24529	0	0	2	2.24529	0	0	2.1	2.24529	0	0	2.2	2.2613	0	0	1	2.2613	0	0	1.1	2.2613	0	0	1.2	2.24852
	2.23603	0	0	4	2.23603	0	0	4.1	2.23603	0	0	4.2	2.25675	0	0	3	2.25675	0	0	3.1	2.25675	0	0	3.2	2.2498	0	0	2	2.2498	0	0	2.1	2.2498	0	0	2.2	2.26581	0	0	1	2.26581	0	0	1.1	2.26581	0	0	1.2	2.25303
	2.23751	0	0	4	2.23751	0	0	4.1	2.23751	0	0	4.2	2.258	0	0	3	2.258	0	0	3.1	2.258	0	0	3.2	2.25128	0	0	2	2.25128	0	0	2.1	2.25128	0	0	2.2	2.2673	0	0	1	2.2673	0	0	1.1	2.2673	0	0	1.2	2.25451
	2.239	0	0	4	2.239	0	0	4.1	2.239	0	0	4.2	2.25949	0	0	3	2.25949	0	0	3.1	2.25949	0	0	3.2	2.25277	0	0	2	2.25277	0	0	2.1	2.25277	0	0	2.2	2.26879	0	0	1	2.26879	0	0	1.1	2.26879	0	0	1.2	2.25601
	2.2402	0	0	4	2.2402	0	0	4.1	2.2402	0	0	4.2	2.26069	0	0	3	2.26069	0	0	3.1	2.26069	0	0	3.2	2.25397	0	0	2	2.25397	0	0	2.1	2.25397	0	0	2.2	2.26999	0	0	1	2.26999	0	0	1.1	2.26999	0	0	1.2	2.25722
	2.24471	0	0	4	2.24471	0	0	4.1	2.24471	0	0	4.2	2.2652	0	0	3	2.2652	0	0	3.1	2.2652	0	0	3.2	2.25848	0	0	2	2.25848	0	0	2.1	2.25848	0	0	2.2	2.2745	0	0	1	2.2745	0	0	1.1	2.2745	0	0	1.2	2.26183
	2.2462	0	0	4	2.2462	0	0	4.1	2.2462	0	0	4.2	2.26669	0	0	3	2.26669	0	0	3.1	2.26669	0	0	3.2	2.25997	0	0	2	2.25997	0	0	2.1	2.25997	0	0	2.2	2.27598	0	0	1	2.27598	0	0	1.1	2.27598	0	0	1.2	2.26332
	2.24768	0	0	4	2.24768	0	0	4.1	2.24768	0	0	4.2	2.26817	0	0	3	2.26817	0	0	3.1	2.26817	0	0	3.2	2.26145	0	0	2	2.26145	0	0	2.1	2.26145	0	0	2.2	2.27747	0	0	1	2.27747	0	0	1.1	2.27747	0	0	1.2	2.26481
	2.24889	0	0	4	2.24889	0	0	4.1	2.24889	0	0	4.2	2.26937	0	0	3	2.26937	0	0	3.1	2.26937	0	0	3.2	2.26266	0	0	2	2.26266	0	0	2.1	2.26266	0	0	2.2	2.27868	0	0	1	2.27868	0	0	1.1	2.27868	0	0	1.2	2.26602
	2.25339	0	0	4	2.25339	0	0	4.1	2.25339	0	0	4.2	2.27388	0	0	3	2.27388	0	0	3.1	2.27388	0	0	3.2	2.26728	0	0	2	2.26728	0	0	2.1	2.26728	0	0	2.2	2.28319	0	0	1	2.28319	0	0	1.1	2.28319	0	0	1.2	2.27053
	2.25488	0	0	4	2.25488	0	0	4.1	2.25488	0	0	4.2	2.27536	0	0	3	2.27536	0	0	3.1	2.27536	0	0	3.2	2.26877	0	0	2	2.26877	0	0	2.1	2.26877	0	0	2.2	2.28467	0	0	1	2.28467	0	0	1.1	2.28467	0	0	1.2	2.27202
	2.25637	0	0	4	2.25637	0	0	4.1	2.25637	0	0	4.2	2.27685	0	0	3	2.27685	0	0	3.1	2.27685	0	0	3.2	2.27025	0	0	2	2.27025	0	0	2.1	2.27025	0	0	2.2	2.28616	0	0	1	2.28616	0	0	1.1	2.28616	0	0	1.2	2.27351
	2.25757	0	0	4	2.25757	0	0	4.1	2.25757	0	0	4.2	2.27806	0	0	3	2.27806	0	0	3.1	2.27806	0	0	3.2	2.27146	0	0	2	2.27146	0	0	2.1	2.27146	0	0	2.2	2.28736	0	0	1	2.28736	0	0	1.1	2.28736	0	0	1.2	2.27471
	2.26208	0	0	4	2.26208	0	0	4.1	2.26208	0	0	4.2	2.28257	0	0	3	2.28257	0	0	3.1	2.28257	0	0	3.2	2.27597	0	0	2	2.27597	0	0	2.1	2.27597	0	0	2.2	2.29187	0	0	1	2.29187	0	0	1.1	2.29187	0	0	1.2	2.27922
	2.26357	0	0	4	2.26357	0	0	4.1	2.26357	0	0	4.2	2.28405	0	0	3	2.28405	0	0	3.1	2.28405	0	0	3.2	2.27745	0	0	2	2.27745	0	0	2.1	2.27745	0	0	2.2	2.29336	0	0	1	2.29336	0	0	1.1	2.29336	0	0	1.2	2.28071
	2.26505	0	0	4	2.26505	0	0	4.1	2.26505	0	0	4.2	2.28554	0	0	3	2.28554	0	0	3.1	2.28554	0	0	3.2	2.27894	0	0	2	2.27894	0	0	2.1	2.27894	0	0	2.2	2.29484	0	0	1	2.29484	0	0	1.1	2.29484	0	0	1.2	2.28219
	2.26626	0	0	4	2.26626	0	0	4.1	2.26626	0	0	4.2	2.28674	0	0	3	2.28674	0	0	3.1	2.28674	0	0	3.2	2.28014	0	0	2	2.28014	0	0	2.1	2.28014	0	0	2.2	2.29605	0	0	1	2.29605	0	0	1.1	2.29605	0	0	1.2	2.2834
	2.27077	0	0	4	2.27077	0	0	4.1	2.27077	0	0	4.2	2.29148	0	0	3	2.29148	0	0	3.1	2.29148	0	0	3.2	2.28465	0	0	2	2.28465	0	0	2.1	2.28465	0	0	2.2	2.30056	0	0	1	2.30056	0	0	1.1	2.30056	0	0	1.2	2.2879
	2.27225	0	0	4	2.27225	0	0	4.1	2.27225	0	0	4.2	2.29296	0	0	3	2.29296	0	0	3.1	2.29296	0	0	3.2	2.28614	0	0	2	2.28614	0	0	2.1	2.28614	0	0	2.2	2.30181	0	0	1	2.30181	0	0	1.1	2.30181	0	0	1.2	2.28939
	2.27374	0	0	4	2.27374	0	0	4.1	2.27374	0	0	4.2	2.29445	0	0	3	2.29445	0	0	3.1	2.29445	0	0	3.2	2.28762	0	0	2	2.28762	0	0	2.1	2.28762	0	0	2.2	2.3033	0	0	1	2.3033	0	0	1.1	2.3033	0	0	1.2	2.29088
	2.27495	0	0	4	2.27495	0	0	4.1	2.27495	0	0	4.2	2.29647	0	0	3	2.29647	0	0	3.1	2.29647	0	0	3.2	2.28883	0	0	2	2.28883	0	0	2.1	2.28883	0	0	2.2	2.3045	0	0	1	2.3045	0	0	1.1	2.3045	0	0	1.2	2.29208
	2.27968	0	0	4	2.27968	0	0	4.1	2.27968	0	0	4.2	2.30098	0	0	3	2.30098	0	0	3.1	2.30098	0	0	3.2	2.29334	0	0	2	2.29334	0	0	2.1	2.29334	0	0	2.2	2.30924	0	0	1	2.30924	0	0	1.1	2.30924	0	0	1.2	2.29682
	2.28117	0	0	4	2.28117	0	0	4.1	2.28117	0	0	4.2	2.30246	0	0	3	2.30246	0	0	3.1	2.30246	0	0	3.2	2.29467	0	0	2	2.29467	0	0	2.1	2.29467	0	0	2.2	2.31073	0	0	1	2.31073	0	0	1.1	2.31073	0	0	1.2	2.29831
	2.28265	0	0	4	2.28265	0	0	4.1	2.28265	0	0	4.2	2.30396	0	0	3	2.30396	0	0	3.1	2.30396	0	0	3.2	2.29615	0	0	2	2.29615	0	0	2.1	2.29615	0	0	2.2	2.31221	0	0	1	2.31221	0	0	1.1	2.31221	0	0	1.2	2.29979
	2.2847	0	0	4	2.2847	0	0	4.1	2.2847	0	0	4.2	2.30517	0	0	3	2.30517	0	0	3.1	2.30517	0	0	3.2	2.29736	0	0	2	2.29736	0	0	2.1	2.29736	0	0	2.2	2.31424	0	0	1	2.31424	0	0	1.1	2.31424	0	0	1.2	2.3018
	2.28921	0	0	4	2.28921	0	0	4.1	2.28921	0	0	4.2	2.30968	0	0	3	2.30968	0	0	3.1	2.30968	0	0	3.2	2.30187	0	0	2	2.30187	0	0	2.1	2.30187	0	0	2.2	2.31899	0	0	1	2.31899	0	0	1.1	2.31899	0	0	1.2	2.30631
	2.29069	0	0	4	2.29069	0	0	4.1	2.29069	0	0	4.2	2.31116	0	0	3	2.31116	0	0	3.1	2.31116	0	0	3.2	2.30335	0	0	2	2.30335	0	0	2.1	2.30335	0	0	2.2	2.32049	0	0	1	2.32049	0	0	1.1	2.32049	0	0	1.2	2.3078
	2.29218	0	0	4	2.29218	0	0	4.1	2.29218	0	0	4.2	2.31265	0	0	3	2.31265	0	0	3.1	2.31265	0	0	3.2	2.30484	0	0	2	2.30484	0	0	2.1	2.30484	0	0	2.2	2.32197	0	0	1	2.32197	0	0	1.1	2.32197	0	0	1.2	2.30928
	2.29338	0	0	4	2.29338	0	0	4.1	2.29338	0	0	4.2	2.31385	0	0	3	2.31385	0	0	3.1	2.31385	0	0	3.2	2.30604	0	0	2	2.30604	0	0	2.1	2.30604	0	0	2.2	2.32402	0	0	1	2.32402	0	0	1.1	2.32402	0	0	1.2	2.31049
	2.29789	0	0	4	2.29789	0	0	4.1	2.29789	0	0	4.2	2.31836	0	0	3	2.31836	0	0	3.1	2.31836	0	0	3.2	2.31055	0	0	2	2.31055	0	0	2.1	2.31055	0	0	2.2	2.32853	0	0	1	2.32853	0	0	1.1	2.32853	0	0	1.2	2.315
	2.29938	0	0	4	2.29938	0	0	4.1	2.29938	0	0	4.2	2.31985	0	0	3	2.31985	0	0	3.1	2.31985	0	0	3.2	2.31204	0	0	2	2.31204	0	0	2.1	2.31204	0	0	2.2	2.33001	0	0	1	2.33001	0	0	1.1	2.33001	0	0	1.2	2.31648
	2.30086	0	0	4	2.30086	0	0	4.1	2.30086	0	0	4.2	2.32133	0	0	3	2.32133	0	0	3.1	2.32133	0	0	3.2	2.31353	0	0	2	2.31353	0	0	2.1	2.31353	0	0	2.2	2.3315	0	0	1	2.3315	0	0	1.1	2.3315	0	0	1.2	2.31797
	2.30207	0	0	4	2.30207	0	0	4.1	2.30207	0	0	4.2	2.32254	0	0	3	2.32254	0	0	3.1	2.32254	0	0	3.2	2.31473	0	0	2	2.31473	0	0	2.1	2.31473	0	0	2.2	2.33353	0	0	1	2.33353	0	0	1.1	2.33353	0	0	1.2	2.31918
	2.30658	0	0	4	2.30658	0	0	4.1	2.30658	0	0	4.2	2.32728	0	0	3	2.32728	0	0	3.1	2.32728	0	0	3.2	2.31947	0	0	2	2.31947	0	0	2.1	2.31947	0	0	2.2	2.33827	0	0	1	2.33827	0	0	1.1	2.33827	0	0	1.2	2.32369
	2.30806	0	0	4	2.30806	0	0	4.1	2.30806	0	0	4.2	2.32876	0	0	3	2.32876	0	0	3.1	2.32876	0	0	3.2	2.32095	0	0	2	2.32095	0	0	2.1	2.32095	0	0	2.2	2.33975	0	0	1	2.33975	0	0	1.1	2.33975	0	0	1.2	2.32517
	2.30955	0	0	4	2.30955	0	0	4.1	2.30955	0	0	4.2	2.33025	0	0	3	2.33025	0	0	3.1	2.33025	0	0	3.2	2.32244	0	0	2	2.32244	0	0	2.1	2.32244	0	0	2.2	2.34124	0	0	1	2.34124	0	0	1.1	2.34124	0	0	1.2	2.32668
	2.31076	0	0	4	2.31076	0	0	4.1	2.31076	0	0	4.2	2.3323	0	0	3	2.3323	0	0	3.1	2.3323	0	0	3.2	2.32448	0	0	2	2.32448	0	0	2.1	2.32448	0	0	2.2	2.34327	0	0	1	2.34327	0	0	1.1	2.34327	0	0	1.2	2.32788
	2.31526	0	0	4	2.31526	0	0	4.1	2.31526	0	0	4.2	2.3368	0	0	3	2.3368	0	0	3.1	2.3368	0	0	3.2	2.32899	0	0	2	2.32899	0	0	2.1	2.32899	0	0	2.2	2.3479	0	0	1	2.3479	0	0	1.1	2.3479	0	0	1.2	2.33239
	2.31675	0	0	4	2.31675	0	0	4.1	2.31675	0	0	4.2	2.33829	0	0	3	2.33829	0	0	3.1	2.33829	0	0	3.2	2.33047	0	0	2	2.33047	0	0	2.1	2.33047	0	0	2.2	2.34938	0	0	1	2.34938	0	0	1.1	2.34938	0	0	1.2	2.33388
	2.31824	0	0	4	2.31824	0	0	4.1	2.31824	0	0	4.2	2.33978	0	0	3	2.33978	0	0	3.1	2.33978	0	0	3.2	2.33196	0	0	2	2.33196	0	0	2.1	2.33196	0	0	2.2	2.35086	0	0	1	2.35086	0	0	1.1	2.35086	0	0	1.2	2.33536
	2.31944	0	0	4	2.31944	0	0	4.1	2.31944	0	0	4.2	2.34098	0	0	3	2.34098	0	0	3.1	2.34098	0	0	3.2	2.33316	0	0	2	2.33316	0	0	2.1	2.33316	0	0	2.2	2.35207	0	0	1	2.35207	0	0	1.1	2.35207	0	0	1.2	2.33657
	2.32396	0	0	4	2.32396	0	0	4.1	2.32396	0	0	4.2	2.34561	0	0	3	2.34561	0	0	3.1	2.34561	0	0	3.2	2.33767	0	0	2	2.33767	0	0	2.1	2.33767	0	0	2.2	2.35681	0	0	1	2.35681	0	0	1.1	2.35681	0	0	1.2	2.3413
	2.32545	0	0	4	2.32545	0	0	4.1	2.32545	0	0	4.2	2.3471	0	0	3	2.3471	0	0	3.1	2.3471	0	0	3.2	2.33916	0	0	2	2.33916	0	0	2.1	2.33916	0	0	2.2	2.35829	0	0	1	2.35829	0	0	1.1	2.35829	0	0	1.2	2.34279
	2.32693	0	0	4	2.32693	0	0	4.1	2.32693	0	0	4.2	2.34859	0	0	3	2.34859	0	0	3.1	2.34859	0	0	3.2	2.34064	0	0	2	2.34064	0	0	2.1	2.34064	0	0	2.2	2.35979	0	0	1	2.35979	0	0	1.1	2.35979	0	0	1.2	2.34428
	2.32899	0	0	4	2.32899	0	0	4.1	2.32899	0	0	4.2	2.34979	0	0	3	2.34979	0	0	3.1	2.34979	0	0	3.2	2.34185	0	0	2	2.34185	0	0	2.1	2.34185	0	0	2.2	2.36182	0	0	1	2.36182	0	0	1.1	2.36182	0	0	1.2	2.34629
	2.33373	0	0	4	2.33373	0	0	4.1	2.33373	0	0	4.2	2.35453	0	0	3	2.35453	0	0	3.1	2.35453	0	0	3.2	2.34636	0	0	2	2.34636	0	0	2.1	2.34636	0	0	2.2	2.36656	0	0	1	2.36656	0	0	1.1	2.36656	0	0	1.2	2.3508
	2.33522	0	0	4	2.33522	0	0	4.1	2.33522	0	0	4.2	2.35602	0	0	3	2.35602	0	0	3.1	2.35602	0	0	3.2	2.34784	0	0	2	2.34784	0	0	2.1	2.34784	0	0	2.2	2.36805	0	0	1	2.36805	0	0	1.1	2.36805	0	0	1.2	2.35228
	2.3367	0	0	4	2.3367	0	0	4.1	2.3367	0	0	4.2	2.3575	0	0	3	2.3575	0	0	3.1	2.3575	0	0	3.2	2.34933	0	0	2	2.34933	0	0	2.1	2.34933	0	0	2.2	2.36953	0	0	1	2.36953	0	0	1.1	2.36953	0	0	1.2	2.35377
	2.33874	0	0	4	2.33874	0	0	4.1	2.33874	0	0	4.2	2.35952	0	0	3	2.35952	0	0	3.1	2.35952	0	0	3.2	2.35137	0	0	2	2.35137	0	0	2.1	2.35137	0	0	2.2	2.37158	0	0	1	2.37158	0	0	1.1	2.37158	0	0	1.2	2.35497
	2.34336	0	0	4	2.34336	0	0	4.1	2.34336	0	0	4.2	2.36403	0	0	3	2.36403	0	0	3.1	2.36403	0	0	3.2	2.35588	0	0	2	2.35588	0	0	2.1	2.35588	0	0	2.2	2.37609	0	0	1	2.37609	0	0	1.1	2.37609	0	0	1.2	2.35948
	2.34484	0	0	4	2.34484	0	0	4.1	2.34484	0	0	4.2	2.36551	0	0	3	2.36551	0	0	3.1	2.36551	0	0	3.2	2.35737	0	0	2	2.35737	0	0	2.1	2.35737	0	0	2.2	2.37758	0	0	1	2.37758	0	0	1.1	2.37758	0	0	1.2	2.36097
	2.34633	0	0	4	2.34633	0	0	4.1	2.34633	0	0	4.2	2.367	0	0	3	2.367	0	0	3.1	2.367	0	0	3.2	2.35885	0	0	2	2.35885	0	0	2.1	2.35885	0	0	2.2	2.37906	0	0	1	2.37906	0	0	1.1	2.37906	0	0	1.2	2.36245
	2.34753	0	0	4	2.34753	0	0	4.1	2.34753	0	0	4.2	2.3682	0	0	3	2.3682	0	0	3.1	2.3682	0	0	3.2	2.36006	0	0	2	2.36006	0	0	2.1	2.36006	0	0	2.2	2.38027	0	0	1	2.38027	0	0	1.1	2.38027	0	0	1.2	2.36366
	2.35204	0	0	4	2.35204	0	0	4.1	2.35204	0	0	4.2	2.37271	0	0	3	2.37271	0	0	3.1	2.37271	0	0	3.2	2.36479	0	0	2	2.36479	0	0	2.1	2.36479	0	0	2.2	2.38477	0	0	1	2.38477	0	0	1.1	2.38477	0	0	1.2	2.36817
	2.35353	0	0	4	2.35353	0	0	4.1	2.35353	0	0	4.2	2.37397	0	0	3	2.37397	0	0	3.1	2.37397	0	0	3.2	2.36628	0	0	2	2.36628	0	0	2.1	2.36628	0	0	2.2	2.38626	0	0	1	2.38626	0	0	1.1	2.38626	0	0	1.2	2.36965
	2.35502	0	0	4	2.35502	0	0	4.1	2.35502	0	0	4.2	2.37545	0	0	3	2.37545	0	0	3.1	2.37545	0	0	3.2	2.36777	0	0	2	2.36777	0	0	2.1	2.36777	0	0	2.2	2.38775	0	0	1	2.38775	0	0	1.1	2.38775	0	0	1.2	2.37114
	2.35622	0	0	4	2.35622	0	0	4.1	2.35622	0	0	4.2	2.37666	0	0	3	2.37666	0	0	3.1	2.37666	0	0	3.2	2.36981	0	0	2	2.36981	0	0	2.1	2.36981	0	0	2.2	2.38895	0	0	1	2.38895	0	0	1.1	2.38895	0	0	1.2	2.37235
	2.36073	0	0	4	2.36073	0	0	4.1	2.36073	0	0	4.2	2.38117	0	0	3	2.38117	0	0	3.1	2.38117	0	0	3.2	2.37432	0	0	2	2.37432	0	0	2.1	2.37432	0	0	2.2	2.39346	0	0	1	2.39346	0	0	1.1	2.39346	0	0	1.2	2.37685
	2.36222	0	0	4	2.36222	0	0	4.1	2.36222	0	0	4.2	2.38265	0	0	3	2.38265	0	0	3.1	2.38265	0	0	3.2	2.37581	0	0	2	2.37581	0	0	2.1	2.37581	0	0	2.2	2.39495	0	0	1	2.39495	0	0	1.1	2.39495	0	0	1.2	2.37834
	2.3637	0	0	4	2.3637	0	0	4.1	2.3637	0	0	4.2	2.38414	0	0	3	2.38414	0	0	3.1	2.38414	0	0	3.2	2.37729	0	0	2	2.37729	0	0	2.1	2.37729	0	0	2.2	2.39644	0	0	1	2.39644	0	0	1.1	2.39644	0	0	1.2	2.37983
	2.36491	0	0	4	2.36491	0	0	4.1	2.36491	0	0	4.2	2.38534	0	0	3	2.38534	0	0	3.1	2.38534	0	0	3.2	2.3785	0	0	2	2.3785	0	0	2.1	2.3785	0	0	2.2	2.39764	0	0	1	2.39764	0	0	1.1	2.39764	0	0	1.2	2.38103
	2.36941	0	0	4	2.36941	0	0	4.1	2.36941	0	0	4.2	2.38985	0	0	3	2.38985	0	0	3.1	2.38985	0	0	3.2	2.383	0	0	2	2.383	0	0	2.1	2.383	0	0	2.2	2.40215	0	0	1	2.40215	0	0	1.1	2.40215	0	0	1.2	2.38554
	2.3709	0	0	4	2.3709	0	0	4.1	2.3709	0	0	4.2	2.39134	0	0	3	2.39134	0	0	3.1	2.39134	0	0	3.2	2.38449	0	0	2	2.38449	0	0	2.1	2.38449	0	0	2.2	2.40364	0	0	1	2.40364	0	0	1.1	2.40364	0	0	1.2	2.38703
	2.37238	0	0	4	2.37238	0	0	4.1	2.37238	0	0	4.2	2.39283	0	0	3	2.39283	0	0	3.1	2.39283	0	0	3.2	2.38597	0	0	2	2.38597	0	0	2.1	2.38597	0	0	2.2	2.40513	0	0	1	2.40513	0	0	1.1	2.40513	0	0	1.2	2.38851
	2.37359	0	0	4	2.37359	0	0	4.1	2.37359	0	0	4.2	2.39403	0	0	3	2.39403	0	0	3.1	2.39403	0	0	3.2	2.38718	0	0	2	2.38718	0	0	2.1	2.38718	0	0	2.2	2.40633	0	0	1	2.40633	0	0	1.1	2.40633	0	0	1.2	2.38972
	2.3781	0	0	4	2.3781	0	0	4.1	2.3781	0	0	4.2	2.39854	0	0	3	2.39854	0	0	3.1	2.39854	0	0	3.2	2.39169	0	0	2	2.39169	0	0	2.1	2.39169	0	0	2.2	2.41084	0	0	1	2.41084	0	0	1.1	2.41084	0	0	1.2	2.39423
	2.37959	0	0	4	2.37959	0	0	4.1	2.37959	0	0	4.2	2.40003	0	0	3	2.40003	0	0	3.1	2.40003	0	0	3.2	2.39318	0	0	2	2.39318	0	0	2.1	2.39318	0	0	2.2	2.41233	0	0	1	2.41233	0	0	1.1	2.41233	0	0	1.2	2.39571
	2.38107	0	0	4	2.38107	0	0	4.1	2.38107	0	0	4.2	2.40151	0	0	3	2.40151	0	0	3.1	2.40151	0	0	3.2	2.39466	0	0	2	2.39466	0	0	2.1	2.39466	0	0	2.2	2.41383	0	0	1	2.41383	0	0	1.1	2.41383	0	0	1.2	2.3972
	2.38228	0	0	4	2.38228	0	0	4.1	2.38228	0	0	4.2	2.40272	0	0	3	2.40272	0	0	3.1	2.40272	0	0	3.2	2.39587	0	0	2	2.39587	0	0	2.1	2.39587	0	0	2.2	2.41504	0	0	1	2.41504	0	0	1.1	2.41504	0	0	1.2	2.3984
	2.38679	0	0	4	2.38679	0	0	4.1	2.38679	0	0	4.2	2.40722	0	0	3	2.40722	0	0	3.1	2.40722	0	0	3.2	2.40038	0	0	2	2.40038	0	0	2.1	2.40038	0	0	2.2	2.41955	0	0	1	2.41955	0	0	1.1	2.41955	0	0	1.2	2.40291
	2.38827	0	0	4	2.38827	0	0	4.1	2.38827	0	0	4.2	2.40871	0	0	3	2.40871	0	0	3.1	2.40871	0	0	3.2	2.4017	0	0	2	2.4017	0	0	2.1	2.4017	0	0	2.2	2.42103	0	0	1	2.42103	0	0	1.1	2.42103	0	0	1.2	2.4044
	2.38976	0	0	4	2.38976	0	0	4.1	2.38976	0	0	4.2	2.4102	0	0	3	2.4102	0	0	3.1	2.4102	0	0	3.2	2.40319	0	0	2	2.40319	0	0	2.1	2.40319	0	0	2.2	2.42252	0	0	1	2.42252	0	0	1.1	2.42252	0	0	1.2	2.40588
	2.39096	0	0	4	2.39096	0	0	4.1	2.39096	0	0	4.2	2.4114	0	0	3	2.4114	0	0	3.1	2.4114	0	0	3.2	2.4044	0	0	2	2.4044	0	0	2.1	2.4044	0	0	2.2	2.42372	0	0	1	2.42372	0	0	1.1	2.42372	0	0	1.2	2.40709
	2.39547	0	0	4	2.39547	0	0	4.1	2.39547	0	0	4.2	2.41591	0	0	3	2.41591	0	0	3.1	2.41591	0	0	3.2	2.40891	0	0	2	2.40891	0	0	2.1	2.40891	0	0	2.2	2.42846	0	0	1	2.42846	0	0	1.1	2.42846	0	0	1.2	2.4116
	2.39696	0	0	4	2.39696	0	0	4.1	2.39696	0	0	4.2	2.4174	0	0	3	2.4174	0	0	3.1	2.4174	0	0	3.2	2.41039	0	0	2	2.41039	0	0	2.1	2.41039	0	0	2.2	2.42995	0	0	1	2.42995	0	0	1.1	2.42995	0	0	1.2	2.41308
	2.39845	0	0	4	2.39845	0	0	4.1	2.39845	0	0	4.2	2.41888	0	0	3	2.41888	0	0	3.1	2.41888	0	0	3.2	2.41189	0	0	2	2.41189	0	0	2.1	2.41189	0	0	2.2	2.43143	0	0	1	2.43143	0	0	1.1	2.43143	0	0	1.2	2.41457
	2.39965	0	0	4	2.39965	0	0	4.1	2.39965	0	0	4.2	2.42009	0	0	3	2.42009	0	0	3.1	2.42009	0	0	3.2	2.4131	0	0	2	2.4131	0	0	2.1	2.4131	0	0	2.2	2.43348	0	0	1	2.43348	0	0	1.1	2.43348	0	0	1.2	2.41577
	2.40416	0	0	4	2.40416	0	0	4.1	2.40416	0	0	4.2	2.4246	0	0	3	2.4246	0	0	3.1	2.4246	0	0	3.2	2.41761	0	0	2	2.41761	0	0	2.1	2.41761	0	0	2.2	2.43799	0	0	1	2.43799	0	0	1.1	2.43799	0	0	1.2	2.42028
	2.40565	0	0	4	2.40565	0	0	4.1	2.40565	0	0	4.2	2.42608	0	0	3	2.42608	0	0	3.1	2.42608	0	0	3.2	2.41909	0	0	2	2.41909	0	0	2.1	2.41909	0	0	2.2	2.43947	0	0	1	2.43947	0	0	1.1	2.43947	0	0	1.2	2.42177
	2.40713	0	0	4	2.40713	0	0	4.1	2.40713	0	0	4.2	2.42757	0	0	3	2.42757	0	0	3.1	2.42757	0	0	3.2	2.42058	0	0	2	2.42058	0	0	2.1	2.42058	0	0	2.2	2.44096	0	0	1	2.44096	0	0	1.1	2.44096	0	0	1.2	2.42325
	2.40834	0	0	4	2.40834	0	0	4.1	2.40834	0	0	4.2	2.42877	0	0	3	2.42877	0	0	3.1	2.42877	0	0	3.2	2.42178	0	0	2	2.42178	0	0	2.1	2.42178	0	0	2.2	2.44217	0	0	1	2.44217	0	0	1.1	2.44217	0	0	1.2	2.42446
	2.41285	0	0	4	2.41285	0	0	4.1	2.41285	0	0	4.2	2.43328	0	0	3	2.43328	0	0	3.1	2.43328	0	0	3.2	2.4264	0	0	2	2.4264	0	0	2.1	2.4264	0	0	2.2	2.44667	0	0	1	2.44667	0	0	1.1	2.44667	0	0	1.2	2.42897
	2.41433	0	0	4	2.41433	0	0	4.1	2.41433	0	0	4.2	2.43477	0	0	3	2.43477	0	0	3.1	2.43477	0	0	3.2	2.4279	0	0	2	2.4279	0	0	2.1	2.4279	0	0	2.2	2.44816	0	0	1	2.44816	0	0	1.1	2.44816	0	0	1.2	2.43046
	2.41582	0	0	4	2.41582	0	0	4.1	2.41582	0	0	4.2	2.43625	0	0	3	2.43625	0	0	3.1	2.43625	0	0	3.2	2.42939	0	0	2	2.42939	0	0	2.1	2.42939	0	0	2.2	2.44965	0	0	1	2.44965	0	0	1.1	2.44965	0	0	1.2	2.43194
	2.41702	0	0	4	2.41702	0	0	4.1	2.41702	0	0	4.2	2.43746	0	0	3	2.43746	0	0	3.1	2.43746	0	0	3.2	2.4306	0	0	2	2.4306	0	0	2.1	2.4306	0	0	2.2	2.45085	0	0	1	2.45085	0	0	1.1	2.45085	0	0	1.2	2.43315
	2.42153	0	0	4	2.42153	0	0	4.1	2.42153	0	0	4.2	2.44197	0	0	3	2.44197	0	0	3.1	2.44197	0	0	3.2	2.43533	0	0	2	2.43533	0	0	2.1	2.43533	0	0	2.2	2.45536	0	0	1	2.45536	0	0	1.1	2.45536	0	0	1.2	2.43765
	2.42302	0	0	4	2.42302	0	0	4.1	2.42302	0	0	4.2	2.44345	0	0	3	2.44345	0	0	3.1	2.44345	0	0	3.2	2.43682	0	0	2	2.43682	0	0	2.1	2.43682	0	0	2.2	2.45685	0	0	1	2.45685	0	0	1.1	2.45685	0	0	1.2	2.43914
	2.4245	0	0	4	2.4245	0	0	4.1	2.4245	0	0	4.2	2.44494	0	0	3	2.44494	0	0	3.1	2.44494	0	0	3.2	2.4383	0	0	2	2.4383	0	0	2.1	2.4383	0	0	2.2	2.45833	0	0	1	2.45833	0	0	1.1	2.45833	0	0	1.2	2.44063
	2.42571	0	0	4	2.42571	0	0	4.1	2.42571	0	0	4.2	2.44615	0	0	3	2.44615	0	0	3.1	2.44615	0	0	3.2	2.44035	0	0	2	2.44035	0	0	2.1	2.44035	0	0	2.2	2.45954	0	0	1	2.45954	0	0	1.1	2.45954	0	0	1.2	2.44183
	2.43045	0	0	4	2.43045	0	0	4.1	2.43045	0	0	4.2	2.45088	0	0	3	2.45088	0	0	3.1	2.45088	0	0	3.2	2.44486	0	0	2	2.44486	0	0	2.1	2.44486	0	0	2.2	2.46405	0	0	1	2.46405	0	0	1.1	2.46405	0	0	1.2	2.44657
	2.43195	0	0	4	2.43195	0	0	4.1	2.43195	0	0	4.2	2.45237	0	0	3	2.45237	0	0	3.1	2.45237	0	0	3.2	2.44634	0	0	2	2.44634	0	0	2.1	2.44634	0	0	2.2	2.46553	0	0	1	2.46553	0	0	1.1	2.46553	0	0	1.2	2.44806
	2.43344	0	0	4	2.43344	0	0	4.1	2.43344	0	0	4.2	2.45386	0	0	3	2.45386	0	0	3.1	2.45386	0	0	3.2	2.44783	0	0	2	2.44783	0	0	2.1	2.44783	0	0	2.2	2.46702	0	0	1	2.46702	0	0	1.1	2.46702	0	0	1.2	2.44955
	2.43547	0	0	4	2.43547	0	0	4.1	2.43547	0	0	4.2	2.45587	0	0	3	2.45587	0	0	3.1	2.45587	0	0	3.2	2.44903	0	0	2	2.44903	0	0	2.1	2.44903	0	0	2.2	2.46822	0	0	1	2.46822	0	0	1.1	2.46822	0	0	1.2	2.45155
	2.43998	0	0	4	2.43998	0	0	4.1	2.43998	0	0	4.2	2.46038	0	0	3	2.46038	0	0	3.1	2.46038	0	0	3.2	2.45354	0	0	2	2.45354	0	0	2.1	2.45354	0	0	2.2	2.47296	0	0	1	2.47296	0	0	1.1	2.47296	0	0	1.2	2.45606
	2.44146	0	0	4	2.44146	0	0	4.1	2.44146	0	0	4.2	2.46186	0	0	3	2.46186	0	0	3.1	2.46186	0	0	3.2	2.45503	0	0	2	2.45503	0	0	2.1	2.45503	0	0	2.2	2.47445	0	0	1	2.47445	0	0	1.1	2.47445	0	0	1.2	2.45754
	2.44295	0	0	4	2.44295	0	0	4.1	2.44295	0	0	4.2	2.46335	0	0	3	2.46335	0	0	3.1	2.46335	0	0	3.2	2.45652	0	0	2	2.45652	0	0	2.1	2.45652	0	0	2.2	2.47594	0	0	1	2.47594	0	0	1.1	2.47594	0	0	1.2	2.45903
	2.44416	0	0	4	2.44416	0	0	4.1	2.44416	0	0	4.2	2.46455	0	0	3	2.46455	0	0	3.1	2.46455	0	0	3.2	2.45772	0	0	2	2.45772	0	0	2.1	2.45772	0	0	2.2	2.47799	0	0	1	2.47799	0	0	1.1	2.47799	0	0	1.2	2.46023
	2.44866	0	0	4	2.44866	0	0	4.1	2.44866	0	0	4.2	2.46906	0	0	3	2.46906	0	0	3.1	2.46906	0	0	3.2	2.46223	0	0	2	2.46223	0	0	2.1	2.46223	0	0	2.2	2.4825	0	0	1	2.4825	0	0	1.1	2.4825	0	0	1.2	2.46474
	2.45015	0	0	4	2.45015	0	0	4.1	2.45015	0	0	4.2	2.47055	0	0	3	2.47055	0	0	3.1	2.47055	0	0	3.2	2.46372	0	0	2	2.46372	0	0	2.1	2.46372	0	0	2.2	2.48399	0	0	1	2.48399	0	0	1.1	2.48399	0	0	1.2	2.46623
	2.45163	0	0	4	2.45163	0	0	4.1	2.45163	0	0	4.2	2.47203	0	0	3	2.47203	0	0	3.1	2.47203	0	0	3.2	2.46521	0	0	2	2.46521	0	0	2.1	2.46521	0	0	2.2	2.48547	0	0	1	2.48547	0	0	1.1	2.48547	0	0	1.2	2.46771
	2.45284	0	0	4	2.45284	0	0	4.1	2.45284	0	0	4.2	2.47324	0	0	3	2.47324	0	0	3.1	2.47324	0	0	3.2	2.46641	0	0	2	2.46641	0	0	2.1	2.46641	0	0	2.2	2.48668	0	0	1	2.48668	0	0	1.1	2.48668	0	0	1.2	2.46892
	2.45758	0	0	4	2.45758	0	0	4.1	2.45758	0	0	4.2	2.47775	0	0	3	2.47775	0	0	3.1	2.47775	0	0	3.2	2.47092	0	0	2	2.47092	0	0	2.1	2.47092	0	0	2.2	2.49142	0	0	1	2.49142	0	0	1.1	2.49142	0	0	1.2	2.47343
	2.45907	0	0	4	2.45907	0	0	4.1	2.45907	0	0	4.2	2.47923	0	0	3	2.47923	0	0	3.1	2.47923	0	0	3.2	2.47241	0	0	2	2.47241	0	0	2.1	2.47241	0	0	2.2	2.4929	0	0	1	2.4929	0	0	1.1	2.4929	0	0	1.2	2.47491
	2.46055	0	0	4	2.46055	0	0	4.1	2.46055	0	0	4.2	2.48072	0	0	3	2.48072	0	0	3.1	2.48072	0	0	3.2	2.4739	0	0	2	2.4739	0	0	2.1	2.4739	0	0	2.2	2.49439	0	0	1	2.49439	0	0	1.1	2.49439	0	0	1.2	2.4764
	2.46257	0	0	4	2.46257	0	0	4.1	2.46257	0	0	4.2	2.48192	0	0	3	2.48192	0	0	3.1	2.48192	0	0	3.2	2.4751	0	0	2	2.4751	0	0	2.1	2.4751	0	0	2.2	2.49642	0	0	1	2.49642	0	0	1.1	2.49642	0	0	1.2	2.4776
	2.46708	0	0	4	2.46708	0	0	4.1	2.46708	0	0	4.2	2.48666	0	0	3	2.48666	0	0	3.1	2.48666	0	0	3.2	2.47984	0	0	2	2.47984	0	0	2.1	2.47984	0	0	2.2	2.50116	0	0	1	2.50116	0	0	1.1	2.50116	0	0	1.2	2.48211
	2.46857	0	0	4	2.46857	0	0	4.1	2.46857	0	0	4.2	2.48815	0	0	3	2.48815	0	0	3.1	2.48815	0	0	3.2	2.48133	0	0	2	2.48133	0	0	2.1	2.48133	0	0	2.2	2.50265	0	0	1	2.50265	0	0	1.1	2.50265	0	0	1.2	2.4836
	2.47005	0	0	4	2.47005	0	0	4.1	2.47005	0	0	4.2	2.48964	0	0	3	2.48964	0	0	3.1	2.48964	0	0	3.2	2.48281	0	0	2	2.48281	0	0	2.1	2.48281	0	0	2.2	2.50413	0	0	1	2.50413	0	0	1.1	2.50413	0	0	1.2	2.48508
	2.47126	0	0	4	2.47126	0	0	4.1	2.47126	0	0	4.2	2.49166	0	0	3	2.49166	0	0	3.1	2.49166	0	0	3.2	2.48486	0	0	2	2.48486	0	0	2.1	2.48486	0	0	2.2	2.50618	0	0	1	2.50618	0	0	1.1	2.50618	0	0	1.2	2.48629
	2.47577	0	0	4	2.47577	0	0	4.1	2.47577	0	0	4.2	2.49617	0	0	3	2.49617	0	0	3.1	2.49617	0	0	3.2	2.48937	0	0	2	2.48937	0	0	2.1	2.48937	0	0	2.2	2.5108	0	0	1	2.5108	0	0	1.1	2.5108	0	0	1.2	2.49103
	2.47725	0	0	4	2.47725	0	0	4.1	2.47725	0	0	4.2	2.49765	0	0	3	2.49765	0	0	3.1	2.49765	0	0	3.2	2.49086	0	0	2	2.49086	0	0	2.1	2.49086	0	0	2.2	2.51229	0	0	1	2.51229	0	0	1.1	2.51229	0	0	1.2	2.49251
	2.47874	0	0	4	2.47874	0	0	4.1	2.47874	0	0	4.2	2.49914	0	0	3	2.49914	0	0	3.1	2.49914	0	0	3.2	2.49234	0	0	2	2.49234	0	0	2.1	2.49234	0	0	2.2	2.51377	0	0	1	2.51377	0	0	1.1	2.51377	0	0	1.2	2.494
	2.47994	0	0	4	2.47994	0	0	4.1	2.47994	0	0	4.2	2.50034	0	0	3	2.50034	0	0	3.1	2.50034	0	0	3.2	2.49355	0	0	2	2.49355	0	0	2.1	2.49355	0	0	2.2	2.51498	0	0	1	2.51498	0	0	1.1	2.51498	0	0	1.2	2.49601
	2.48445	0	0	4	2.48445	0	0	4.1	2.48445	0	0	4.2	2.50508	0	0	3	2.50508	0	0	3.1	2.50508	0	0	3.2	2.49806	0	0	2	2.49806	0	0	2.1	2.49806	0	0	2.2	2.51971	0	0	1	2.51971	0	0	1.1	2.51971	0	0	1.2	2.50075
	2.48594	0	0	4	2.48594	0	0	4.1	2.48594	0	0	4.2	2.50657	0	0	3	2.50657	0	0	3.1	2.50657	0	0	3.2	2.49954	0	0	2	2.49954	0	0	2.1	2.49954	0	0	2.2	2.5212	0	0	1	2.5212	0	0	1.1	2.5212	0	0	1.2	2.50224
	2.48743	0	0	4	2.48743	0	0	4.1	2.48743	0	0	4.2	2.50805	0	0	3	2.50805	0	0	3.1	2.50805	0	0	3.2	2.50103	0	0	2	2.50103	0	0	2.1	2.50103	0	0	2.2	2.52269	0	0	1	2.52269	0	0	1.1	2.52269	0	0	1.2	2.50372
	2.48863	0	0	4	2.48863	0	0	4.1	2.48863	0	0	4.2	2.51009	0	0	3	2.51009	0	0	3.1	2.51009	0	0	3.2	2.50223	0	0	2	2.50223	0	0	2.1	2.50223	0	0	2.2	2.52473	0	0	1	2.52473	0	0	1.1	2.52473	0	0	1.2	2.50572
	2.49337	0	0	4	2.49337	0	0	4.1	2.49337	0	0	4.2	2.51472	0	0	3	2.51472	0	0	3.1	2.51472	0	0	3.2	2.50674	0	0	2	2.50674	0	0	2.1	2.50674	0	0	2.2	2.52947	0	0	1	2.52947	0	0	1.1	2.52947	0	0	1.2	2.51023
	2.49486	0	0	4	2.49486	0	0	4.1	2.49486	0	0	4.2	2.5162	0	0	3	2.5162	0	0	3.1	2.5162	0	0	3.2	2.50823	0	0	2	2.50823	0	0	2.1	2.50823	0	0	2.2	2.53095	0	0	1	2.53095	0	0	1.1	2.53095	0	0	1.2	2.51172
	2.49634	0	0	4	2.49634	0	0	4.1	2.49634	0	0	4.2	2.51769	0	0	3	2.51769	0	0	3.1	2.51769	0	0	3.2	2.50971	0	0	2	2.50971	0	0	2.1	2.50971	0	0	2.2	2.53244	0	0	1	2.53244	0	0	1.1	2.53244	0	0	1.2	2.51321
	2.49838	0	0	4	2.49838	0	0	4.1	2.49838	0	0	4.2	2.51889	0	0	3	2.51889	0	0	3.1	2.51889	0	0	3.2	2.51092	0	0	2	2.51092	0	0	2.1	2.51092	0	0	2.2	2.53448	0	0	1	2.53448	0	0	1.1	2.53448	0	0	1.2	2.51441
	2.50289	0	0	4	2.50289	0	0	4.1	2.50289	0	0	4.2	2.5234	0	0	3	2.5234	0	0	3.1	2.5234	0	0	3.2	2.51543	0	0	2	2.51543	0	0	2.1	2.51543	0	0	2.2	2.53899	0	0	1	2.53899	0	0	1.1	2.53899	0	0	1.2	2.51892
	2.50438	0	0	4	2.50438	0	0	4.1	2.50438	0	0	4.2	2.52489	0	0	3	2.52489	0	0	3.1	2.52489	0	0	3.2	2.51691	0	0	2	2.51691	0	0	2.1	2.51691	0	0	2.2	2.54049	0	0	1	2.54049	0	0	1.1	2.54049	0	0	1.2	2.52041
	2.50586	0	0	4	2.50586	0	0	4.1	2.50586	0	0	4.2	2.52637	0	0	3	2.52637	0	0	3.1	2.52637	0	0	3.2	2.5184	0	0	2	2.5184	0	0	2.1	2.5184	0	0	2.2	2.54198	0	0	1	2.54198	0	0	1.1	2.54198	0	0	1.2	2.52189
	2.50707	0	0	4	2.50707	0	0	4.1	2.50707	0	0	4.2	2.52758	0	0	3	2.52758	0	0	3.1	2.52758	0	0	3.2	2.51961	0	0	2	2.51961	0	0	2.1	2.51961	0	0	2.2	2.54318	0	0	1	2.54318	0	0	1.1	2.54318	0	0	1.2	2.5231
	2.51168	0	0	4	2.51168	0	0	4.1	2.51168	0	0	4.2	2.53209	0	0	3	2.53209	0	0	3.1	2.53209	0	0	3.2	2.52434	0	0	2	2.52434	0	0	2.1	2.52434	0	0	2.2	2.54769	0	0	1	2.54769	0	0	1.1	2.54769	0	0	1.2	2.5276
	2.51317	0	0	4	2.51317	0	0	4.1	2.51317	0	0	4.2	2.53358	0	0	3	2.53358	0	0	3.1	2.53358	0	0	3.2	2.52583	0	0	2	2.52583	0	0	2.1	2.52583	0	0	2.2	2.54917	0	0	1	2.54917	0	0	1.1	2.54917	0	0	1.2	2.52909
	2.51465	0	0	4	2.51465	0	0	4.1	2.51465	0	0	4.2	2.53506	0	0	3	2.53506	0	0	3.1	2.53506	0	0	3.2	2.52731	0	0	2	2.52731	0	0	2.1	2.52731	0	0	2.2	2.55066	0	0	1	2.55066	0	0	1.1	2.55066	0	0	1.2	2.53058
	2.51586	0	0	4	2.51586	0	0	4.1	2.51586	0	0	4.2	2.53627	0	0	3	2.53627	0	0	3.1	2.53627	0	0	3.2	2.52937	0	0	2	2.52937	0	0	2.1	2.52937	0	0	2.2	2.55187	0	0	1	2.55187	0	0	1.1	2.55187	0	0	1.2	2.53178
	2.5206	0	0	4	2.5206	0	0	4.1	2.5206	0	0	4.2	2.54077	0	0	3	2.54077	0	0	3.1	2.54077	0	0	3.2	2.53388	0	0	2	2.53388	0	0	2.1	2.53388	0	0	2.2	2.55638	0	0	1	2.55638	0	0	1.1	2.55638	0	0	1.2	2.53629
	2.52209	0	0	4	2.52209	0	0	4.1	2.52209	0	0	4.2	2.54226	0	0	3	2.54226	0	0	3.1	2.54226	0	0	3.2	2.53536	0	0	2	2.53536	0	0	2.1	2.53536	0	0	2.2	2.55786	0	0	1	2.55786	0	0	1.1	2.55786	0	0	1.2	2.53778
	2.52357	0	0	4	2.52357	0	0	4.1	2.52357	0	0	4.2	2.54374	0	0	3	2.54374	0	0	3.1	2.54374	0	0	3.2	2.53685	0	0	2	2.53685	0	0	2.1	2.53685	0	0	2.2	2.55935	0	0	1	2.55935	0	0	1.1	2.55935	0	0	1.2	2.53926
	2.52561	0	0	4	2.52561	0	0	4.1	2.52561	0	0	4.2	2.54495	0	0	3	2.54495	0	0	3.1	2.54495	0	0	3.2	2.53805	0	0	2	2.53805	0	0	2.1	2.53805	0	0	2.2	2.56055	0	0	1	2.56055	0	0	1.1	2.56055	0	0	1.2	2.54047
	2.53012	0	0	4	2.53012	0	0	4.1	2.53012	0	0	4.2	2.54946	0	0	3	2.54946	0	0	3.1	2.54946	0	0	3.2	2.54256	0	0	2	2.54256	0	0	2.1	2.54256	0	0	2.2	2.56506	0	0	1	2.56506	0	0	1.1	2.56506	0	0	1.2	2.54498
	2.5316	0	0	4	2.5316	0	0	4.1	2.5316	0	0	4.2	2.55095	0	0	3	2.55095	0	0	3.1	2.55095	0	0	3.2	2.54405	0	0	2	2.54405	0	0	2.1	2.54405	0	0	2.2	2.56655	0	0	1	2.56655	0	0	1.1	2.56655	0	0	1.2	2.54646
	2.53309	0	0	4	2.53309	0	0	4.1	2.53309	0	0	4.2	2.55243	0	0	3	2.55243	0	0	3.1	2.55243	0	0	3.2	2.54554	0	0	2	2.54554	0	0	2.1	2.54554	0	0	2.2	2.56803	0	0	1	2.56803	0	0	1.1	2.56803	0	0	1.2	2.54795
	2.5343	0	0	4	2.5343	0	0	4.1	2.5343	0	0	4.2	2.55364	0	0	3	2.55364	0	0	3.1	2.55364	0	0	3.2	2.54674	0	0	2	2.54674	0	0	2.1	2.54674	0	0	2.2	2.56924	0	0	1	2.56924	0	0	1.1	2.56924	0	0	1.2	2.54915
	2.53881	0	0	4	2.53881	0	0	4.1	2.53881	0	0	4.2	2.55815	0	0	3	2.55815	0	0	3.1	2.55815	0	0	3.2	2.55125	0	0	2	2.55125	0	0	2.1	2.55125	0	0	2.2	2.57375	0	0	1	2.57375	0	0	1.1	2.57375	0	0	1.2	2.55366
	2.54029	0	0	4	2.54029	0	0	4.1	2.54029	0	0	4.2	2.55963	0	0	3	2.55963	0	0	3.1	2.55963	0	0	3.2	2.55268	0	0	2	2.55268	0	0	2.1	2.55268	0	0	2.2	2.57523	0	0	1	2.57523	0	0	1.1	2.57523	0	0	1.2	2.55515
	2.54178	0	0	4	2.54178	0	0	4.1	2.54178	0	0	4.2	2.56112	0	0	3	2.56112	0	0	3.1	2.56112	0	0	3.2	2.55417	0	0	2	2.55417	0	0	2.1	2.55417	0	0	2.2	2.57672	0	0	1	2.57672	0	0	1.1	2.57672	0	0	1.2	2.55664
	2.54299	0	0	4	2.54299	0	0	4.1	2.54299	0	0	4.2	2.56232	0	0	3	2.56232	0	0	3.1	2.56232	0	0	3.2	2.55537	0	0	2	2.55537	0	0	2.1	2.55537	0	0	2.2	2.57792	0	0	1	2.57792	0	0	1.1	2.57792	0	0	1.2	2.55784
	2.5475	0	0	4	2.5475	0	0	4.1	2.5475	0	0	4.2	2.56683	0	0	3	2.56683	0	0	3.1	2.56683	0	0	3.2	2.55988	0	0	2	2.55988	0	0	2.1	2.55988	0	0	2.2	2.58243	0	0	1	2.58243	0	0	1.1	2.58243	0	0	1.2	2.56235
	2.54898	0	0	4	2.54898	0	0	4.1	2.54898	0	0	4.2	2.56832	0	0	3	2.56832	0	0	3.1	2.56832	0	0	3.2	2.56137	0	0	2	2.56137	0	0	2.1	2.56137	0	0	2.2	2.58392	0	0	1	2.58392	0	0	1.1	2.58392	0	0	1.2	2.56384
	2.55047	0	0	4	2.55047	0	0	4.1	2.55047	0	0	4.2	2.56981	0	0	3	2.56981	0	0	3.1	2.56981	0	0	3.2	2.56285	0	0	2	2.56285	0	0	2.1	2.56285	0	0	2.2	2.5854	0	0	1	2.5854	0	0	1.1	2.5854	0	0	1.2	2.56534
	2.55167	0	0	4	2.55167	0	0	4.1	2.55167	0	0	4.2	2.57101	0	0	3	2.57101	0	0	3.1	2.57101	0	0	3.2	2.56406	0	0	2	2.56406	0	0	2.1	2.56406	0	0	2.2	2.58661	0	0	1	2.58661	0	0	1.1	2.58661	0	0	1.2	2.56654
	2.55618	0	0	4	2.55618	0	0	4.1	2.55618	0	0	4.2	2.57552	0	0	3	2.57552	0	0	3.1	2.57552	0	0	3.2	2.56857	0	0	2	2.56857	0	0	2.1	2.56857	0	0	2.2	2.59112	0	0	1	2.59112	0	0	1.1	2.59112	0	0	1.2	2.57106
	2.55767	0	0	4	2.55767	0	0	4.1	2.55767	0	0	4.2	2.57701	0	0	3	2.57701	0	0	3.1	2.57701	0	0	3.2	2.57006	0	0	2	2.57006	0	0	2.1	2.57006	0	0	2.2	2.5926	0	0	1	2.5926	0	0	1.1	2.5926	0	0	1.2	2.57254
	2.55915	0	0	4	2.55915	0	0	4.1	2.55915	0	0	4.2	2.57849	0	0	3	2.57849	0	0	3.1	2.57849	0	0	3.2	2.57154	0	0	2	2.57154	0	0	2.1	2.57154	0	0	2.2	2.59409	0	0	1	2.59409	0	0	1.1	2.59409	0	0	1.2	2.57403
	2.56036	0	0	4	2.56036	0	0	4.1	2.56036	0	0	4.2	2.5797	0	0	3	2.5797	0	0	3.1	2.5797	0	0	3.2	2.57275	0	0	2	2.57275	0	0	2.1	2.57275	0	0	2.2	2.59612	0	0	1	2.59612	0	0	1.1	2.59612	0	0	1.2	2.57523
	2.56487	0	0	4	2.56487	0	0	4.1	2.56487	0	0	4.2	2.58421	0	0	3	2.58421	0	0	3.1	2.58421	0	0	3.2	2.57726	0	0	2	2.57726	0	0	2.1	2.57726	0	0	2.2	2.60086	0	0	1	2.60086	0	0	1.1	2.60086	0	0	1.2	2.57974
	2.56635	0	0	4	2.56635	0	0	4.1	2.56635	0	0	4.2	2.58569	0	0	3	2.58569	0	0	3.1	2.58569	0	0	3.2	2.57874	0	0	2	2.57874	0	0	2.1	2.57874	0	0	2.2	2.60234	0	0	1	2.60234	0	0	1.1	2.60234	0	0	1.2	2.58123
	2.56784	0	0	4	2.56784	0	0	4.1	2.56784	0	0	4.2	2.58718	0	0	3	2.58718	0	0	3.1	2.58718	0	0	3.2	2.58023	0	0	2	2.58023	0	0	2.1	2.58023	0	0	2.2	2.60383	0	0	1	2.60383	0	0	1.1	2.60383	0	0	1.2	2.58271
	2.56904	0	0	4	2.56904	0	0	4.1	2.56904	0	0	4.2	2.58838	0	0	3	2.58838	0	0	3.1	2.58838	0	0	3.2	2.58144	0	0	2	2.58144	0	0	2.1	2.58144	0	0	2.2	2.60587	0	0	1	2.60587	0	0	1.1	2.60587	0	0	1.2	2.58392
	2.57355	0	0	4	2.57355	0	0	4.1	2.57355	0	0	4.2	2.59289	0	0	3	2.59289	0	0	3.1	2.59289	0	0	3.2	2.58617	0	0	2	2.58617	0	0	2.1	2.58617	0	0	2.2	2.61038	0	0	1	2.61038	0	0	1.1	2.61038	0	0	1.2	2.58842
	2.57504	0	0	4	2.57504	0	0	4.1	2.57504	0	0	4.2	2.59438	0	0	3	2.59438	0	0	3.1	2.59438	0	0	3.2	2.58766	0	0	2	2.58766	0	0	2.1	2.58766	0	0	2.2	2.61187	0	0	1	2.61187	0	0	1.1	2.61187	0	0	1.2	2.58991
	2.57652	0	0	4	2.57652	0	0	4.1	2.57652	0	0	4.2	2.59586	0	0	3	2.59586	0	0	3.1	2.59586	0	0	3.2	2.58914	0	0	2	2.58914	0	0	2.1	2.58914	0	0	2.2	2.61335	0	0	1	2.61335	0	0	1.1	2.61335	0	0	1.2	2.59139
	2.57773	0	0	4	2.57773	0	0	4.1	2.57773	0	0	4.2	2.59707	0	0	3	2.59707	0	0	3.1	2.59707	0	0	3.2	2.5912	0	0	2	2.5912	0	0	2.1	2.5912	0	0	2.2	2.61456	0	0	1	2.61456	0	0	1.1	2.61456	0	0	1.2	2.5926
	2.58224	0	0	4	2.58224	0	0	4.1	2.58224	0	0	4.2	2.60158	0	0	3	2.60158	0	0	3.1	2.60158	0	0	3.2	2.59581	0	0	2	2.59581	0	0	2.1	2.59581	0	0	2.2	2.61907	0	0	1	2.61907	0	0	1.1	2.61907	0	0	1.2	2.59711
	2.58372	0	0	4	2.58372	0	0	4.1	2.58372	0	0	4.2	2.60306	0	0	3	2.60306	0	0	3.1	2.60306	0	0	3.2	2.5973	0	0	2	2.5973	0	0	2.1	2.5973	0	0	2.2	2.62055	0	0	1	2.62055	0	0	1.1	2.62055	0	0	1.2	2.59859
	2.58521	0	0	4	2.58521	0	0	4.1	2.58521	0	0	4.2	2.60455	0	0	3	2.60455	0	0	3.1	2.60455	0	0	3.2	2.59879	0	0	2	2.59879	0	0	2.1	2.59879	0	0	2.2	2.62204	0	0	1	2.62204	0	0	1.1	2.62204	0	0	1.2	2.60008
	2.58642	0	0	4	2.58642	0	0	4.1	2.58642	0	0	4.2	2.60575	0	0	3	2.60575	0	0	3.1	2.60575	0	0	3.2	2.59999	0	0	2	2.59999	0	0	2.1	2.59999	0	0	2.2	2.62324	0	0	1	2.62324	0	0	1.1	2.62324	0	0	1.2	2.60129
	2.59117	0	0	4	2.59117	0	0	4.1	2.59117	0	0	4.2	2.61026	0	0	3	2.61026	0	0	3.1	2.61026	0	0	3.2	2.6045	0	0	2	2.6045	0	0	2.1	2.6045	0	0	2.2	2.62775	0	0	1	2.62775	0	0	1.1	2.62775	0	0	1.2	2.60603
	2.59266	0	0	4	2.59266	0	0	4.1	2.59266	0	0	4.2	2.61175	0	0	3	2.61175	0	0	3.1	2.61175	0	0	3.2	2.60599	0	0	2	2.60599	0	0	2.1	2.60599	0	0	2.2	2.62924	0	0	1	2.62924	0	0	1.1	2.62924	0	0	1.2	2.60751
	2.59414	0	0	4	2.59414	0	0	4.1	2.59414	0	0	4.2	2.61323	0	0	3	2.61323	0	0	3.1	2.61323	0	0	3.2	2.60747	0	0	2	2.60747	0	0	2.1	2.60747	0	0	2.2	2.63073	0	0	1	2.63073	0	0	1.1	2.63073	0	0	1.2	2.609
	2.59615	0	0	4	2.59615	0	0	4.1	2.59615	0	0	4.2	2.61444	0	0	3	2.61444	0	0	3.1	2.61444	0	0	3.2	2.60868	0	0	2	2.60868	0	0	2.1	2.60868	0	0	2.2	2.63193	0	0	1	2.63193	0	0	1.1	2.63193	0	0	1.2	2.611
	2.60066	0	0	4	2.60066	0	0	4.1	2.60066	0	0	4.2	2.61895	0	0	3	2.61895	0	0	3.1	2.61895	0	0	3.2	2.61319	0	0	2	2.61319	0	0	2.1	2.61319	0	0	2.2	2.63644	0	0	1	2.63644	0	0	1.1	2.63644	0	0	1.2	2.61551
	2.60215	0	0	4	2.60215	0	0	4.1	2.60215	0	0	4.2	2.62043	0	0	3	2.62043	0	0	3.1	2.62043	0	0	3.2	2.61467	0	0	2	2.61467	0	0	2.1	2.61467	0	0	2.2	2.63792	0	0	1	2.63792	0	0	1.1	2.63792	0	0	1.2	2.61699
	2.60363	0	0	4	2.60363	0	0	4.1	2.60363	0	0	4.2	2.62192	0	0	3	2.62192	0	0	3.1	2.62192	0	0	3.2	2.61616	0	0	2	2.61616	0	0	2.1	2.61616	0	0	2.2	2.63941	0	0	1	2.63941	0	0	1.1	2.63941	0	0	1.2	2.61848
	2.60484	0	0	4	2.60484	0	0	4.1	2.60484	0	0	4.2	2.62312	0	0	3	2.62312	0	0	3.1	2.62312	0	0	3.2	2.61736	0	0	2	2.61736	0	0	2.1	2.61736	0	0	2.2	2.64062	0	0	1	2.64062	0	0	1.1	2.64062	0	0	1.2	2.61969
	2.60935	0	0	4	2.60935	0	0	4.1	2.60935	0	0	4.2	2.62763	0	0	3	2.62763	0	0	3.1	2.62763	0	0	3.2	2.62187	0	0	2	2.62187	0	0	2.1	2.62187	0	0	2.2	2.64512	0	0	1	2.64512	0	0	1.1	2.64512	0	0	1.2	2.62419
	2.61083	0	0	4	2.61083	0	0	4.1	2.61083	0	0	4.2	2.62912	0	0	3	2.62912	0	0	3.1	2.62912	0	0	3.2	2.62336	0	0	2	2.62336	0	0	2.1	2.62336	0	0	2.2	2.64661	0	0	1	2.64661	0	0	1.1	2.64661	0	0	1.2	2.62568
	2.61232	0	0	4	2.61232	0	0	4.1	2.61232	0	0	4.2	2.6306	0	0	3	2.6306	0	0	3.1	2.6306	0	0	3.2	2.62484	0	0	2	2.62484	0	0	2.1	2.62484	0	0	2.2	2.6481	0	0	1	2.6481	0	0	1.1	2.6481	0	0	1.2	2.62713
	2.61352	0	0	4	2.61352	0	0	4.1	2.61352	0	0	4.2	2.63181	0	0	3	2.63181	0	0	3.1	2.63181	0	0	3.2	2.62605	0	0	2	2.62605	0	0	2.1	2.62605	0	0	2.2	2.6493	0	0	1	2.6493	0	0	1.1	2.6493	0	0	1.2	2.62833
	2.61803	0	0	4	2.61803	0	0	4.1	2.61803	0	0	4.2	2.63632	0	0	3	2.63632	0	0	3.1	2.63632	0	0	3.2	2.63079	0	0	2	2.63079	0	0	2.1	2.63079	0	0	2.2	2.65404	0	0	1	2.65404	0	0	1.1	2.65404	0	0	1.2	2.63284
	2.61952	0	0	4	2.61952	0	0	4.1	2.61952	0	0	4.2	2.63781	0	0	3	2.63781	0	0	3.1	2.63781	0	0	3.2	2.63227	0	0	2	2.63227	0	0	2.1	2.63227	0	0	2.2	2.65552	0	0	1	2.65552	0	0	1.1	2.65552	0	0	1.2	2.63433
	2.621	0	0	4	2.621	0	0	4.1	2.621	0	0	4.2	2.6393	0	0	3	2.6393	0	0	3.1	2.6393	0	0	3.2	2.63376	0	0	2	2.63376	0	0	2.1	2.63376	0	0	2.2	2.65701	0	0	1	2.65701	0	0	1.1	2.65701	0	0	1.2	2.63582
	2.62221	0	0	4	2.62221	0	0	4.1	2.62221	0	0	4.2	2.6405	0	0	3	2.6405	0	0	3.1	2.6405	0	0	3.2	2.63583	0	0	2	2.63583	0	0	2.1	2.63583	0	0	2.2	2.65903	0	0	1	2.65903	0	0	1.1	2.65903	0	0	1.2	2.63702
	2.62672	0	0	4	2.62672	0	0	4.1	2.62672	0	0	4.2	2.64501	0	0	3	2.64501	0	0	3.1	2.64501	0	0	3.2	2.64034	0	0	2	2.64034	0	0	2.1	2.64034	0	0	2.2	2.66377	0	0	1	2.66377	0	0	1.1	2.66377	0	0	1.2	2.64153
	2.62821	0	0	4	2.62821	0	0	4.1	2.62821	0	0	4.2	2.6465	0	0	3	2.6465	0	0	3.1	2.6465	0	0	3.2	2.64182	0	0	2	2.64182	0	0	2.1	2.64182	0	0	2.2	2.66525	0	0	1	2.66525	0	0	1.1	2.66525	0	0	1.2	2.64302
	2.62969	0	0	4	2.62969	0	0	4.1	2.62969	0	0	4.2	2.648	0	0	3	2.648	0	0	3.1	2.648	0	0	3.2	2.64331	0	0	2	2.64331	0	0	2.1	2.64331	0	0	2.2	2.66674	0	0	1	2.66674	0	0	1.1	2.66674	0	0	1.2	2.6445
	2.6309	0	0	4	2.6309	0	0	4.1	2.6309	0	0	4.2	2.64921	0	0	3	2.64921	0	0	3.1	2.64921	0	0	3.2	2.64451	0	0	2	2.64451	0	0	2.1	2.64451	0	0	2.2	2.66878	0	0	1	2.66878	0	0	1.1	2.66878	0	0	1.2	2.64571
	2.63541	0	0	4	2.63541	0	0	4.1	2.63541	0	0	4.2	2.65394	0	0	3	2.65394	0	0	3.1	2.65394	0	0	3.2	2.64902	0	0	2	2.64902	0	0	2.1	2.64902	0	0	2.2	2.67352	0	0	1	2.67352	0	0	1.1	2.67352	0	0	1.2	2.65044
	2.63689	0	0	4	2.63689	0	0	4.1	2.63689	0	0	4.2	2.65543	0	0	3	2.65543	0	0	3.1	2.65543	0	0	3.2	2.65051	0	0	2	2.65051	0	0	2.1	2.65051	0	0	2.2	2.675	0	0	1	2.675	0	0	1.1	2.675	0	0	1.2	2.65193
	2.63838	0	0	4	2.63838	0	0	4.1	2.63838	0	0	4.2	2.65692	0	0	3	2.65692	0	0	3.1	2.65692	0	0	3.2	2.65199	0	0	2	2.65199	0	0	2.1	2.65199	0	0	2.2	2.6765	0	0	1	2.6765	0	0	1.1	2.6765	0	0	1.2	2.65342
	2.63958	0	0	4	2.63958	0	0	4.1	2.63958	0	0	4.2	2.65894	0	0	3	2.65894	0	0	3.1	2.65894	0	0	3.2	2.6532	0	0	2	2.6532	0	0	2.1	2.6532	0	0	2.2	2.67853	0	0	1	2.67853	0	0	1.1	2.67853	0	0	1.2	2.65542
	2.64432	0	0	4	2.64432	0	0	4.1	2.64432	0	0	4.2	2.66368	0	0	3	2.66368	0	0	3.1	2.66368	0	0	3.2	2.65771	0	0	2	2.65771	0	0	2.1	2.65771	0	0	2.2	2.68315	0	0	1	2.68315	0	0	1.1	2.68315	0	0	1.2	2.66016
	2.64581	0	0	4	2.64581	0	0	4.1	2.64581	0	0	4.2	2.66516	0	0	3	2.66516	0	0	3.1	2.66516	0	0	3.2	2.65919	0	0	2	2.65919	0	0	2.1	2.65919	0	0	2.2	2.68464	0	0	1	2.68464	0	0	1.1	2.68464	0	0	1.2	2.66165
	2.64729	0	0	4	2.64729	0	0	4.1	2.64729	0	0	4.2	2.66666	0	0	3	2.66666	0	0	3.1	2.66666	0	0	3.2	2.66068	0	0	2	2.66068	0	0	2.1	2.66068	0	0	2.2	2.68612	0	0	1	2.68612	0	0	1.1	2.68612	0	0	1.2	2.66313
	2.64929	0	0	4	2.64929	0	0	4.1	2.64929	0	0	4.2	2.66867	0	0	3	2.66867	0	0	3.1	2.66867	0	0	3.2	2.66188	0	0	2	2.66188	0	0	2.1	2.66188	0	0	2.2	2.68733	0	0	1	2.68733	0	0	1.1	2.68733	0	0	1.2	2.66512
	2.65379	0	0	4	2.65379	0	0	4.1	2.65379	0	0	4.2	2.67318	0	0	3	2.67318	0	0	3.1	2.67318	0	0	3.2	2.66662	0	0	2	2.66662	0	0	2.1	2.66662	0	0	2.2	2.69184	0	0	1	2.69184	0	0	1.1	2.69184	0	0	1.2	2.66963
	2.65528	0	0	4	2.65528	0	0	4.1	2.65528	0	0	4.2	2.67468	0	0	3	2.67468	0	0	3.1	2.67468	0	0	3.2	2.66811	0	0	2	2.66811	0	0	2.1	2.66811	0	0	2.2	2.69332	0	0	1	2.69332	0	0	1.1	2.69332	0	0	1.2	2.67112
	2.65677	0	0	4	2.65677	0	0	4.1	2.65677	0	0	4.2	2.67616	0	0	3	2.67616	0	0	3.1	2.67616	0	0	3.2	2.66959	0	0	2	2.66959	0	0	2.1	2.66959	0	0	2.2	2.69481	0	0	1	2.69481	0	0	1.1	2.69481	0	0	1.2	2.6726
	2.65798	0	0	4	2.65798	0	0	4.1	2.65798	0	0	4.2	2.67737	0	0	3	2.67737	0	0	3.1	2.67737	0	0	3.2	2.67165	0	0	2	2.67165	0	0	2.1	2.67165	0	0	2.2	2.69602	0	0	1	2.69602	0	0	1.1	2.69602	0	0	1.2	2.67381
	2.66271	0	0	4	2.66271	0	0	4.1	2.66271	0	0	4.2	2.68188	0	0	3	2.68188	0	0	3.1	2.68188	0	0	3.2	2.67616	0	0	2	2.67616	0	0	2.1	2.67616	0	0	2.2	2.70052	0	0	1	2.70052	0	0	1.1	2.70052	0	0	1.2	2.67832
	2.6642	0	0	4	2.6642	0	0	4.1	2.6642	0	0	4.2	2.68336	0	0	3	2.68336	0	0	3.1	2.68336	0	0	3.2	2.67764	0	0	2	2.67764	0	0	2.1	2.67764	0	0	2.2	2.70201	0	0	1	2.70201	0	0	1.1	2.70201	0	0	1.2	2.6798
	2.66568	0	0	4	2.66568	0	0	4.1	2.66568	0	0	4.2	2.68485	0	0	3	2.68485	0	0	3.1	2.68485	0	0	3.2	2.67913	0	0	2	2.67913	0	0	2.1	2.67913	0	0	2.2	2.7035	0	0	1	2.7035	0	0	1.1	2.7035	0	0	1.2	2.68129
	2.66763	0	0	4	2.66763	0	0	4.1	2.66763	0	0	4.2	2.68605	0	0	3	2.68605	0	0	3.1	2.68605	0	0	3.2	2.68033	0	0	2	2.68033	0	0	2.1	2.68033	0	0	2.2	2.7047	0	0	1	2.7047	0	0	1.1	2.7047	0	0	1.2	2.68249
	2.67214	0	0	4	2.67214	0	0	4.1	2.67214	0	0	4.2	2.69056	0	0	3	2.69056	0	0	3.1	2.69056	0	0	3.2	2.68484	0	0	2	2.68484	0	0	2.1	2.68484	0	0	2.2	2.70921	0	0	1	2.70921	0	0	1.1	2.70921	0	0	1.2	2.687
	2.67363	0	0	4	2.67363	0	0	4.1	2.67363	0	0	4.2	2.69182	0	0	3	2.69182	0	0	3.1	2.69182	0	0	3.2	2.68633	0	0	2	2.68633	0	0	2.1	2.68633	0	0	2.2	2.7107	0	0	1	2.7107	0	0	1.1	2.7107	0	0	1.2	2.68849
	2.67488	0	0	4	2.67488	0	0	4.1	2.67488	0	0	4.2	2.69332	0	0	3	2.69332	0	0	3.1	2.69332	0	0	3.2	2.68781	0	0	2	2.68781	0	0	2.1	2.68781	0	0	2.2	2.71218	0	0	1	2.71218	0	0	1.1	2.71218	0	0	1.2	2.68998
	2.67609	0	0	4	2.67609	0	0	4.1	2.67609	0	0	4.2	2.69453	0	0	3	2.69453	0	0	3.1	2.69453	0	0	3.2	2.68987	0	0	2	2.68987	0	0	2.1	2.68987	0	0	2.2	2.71339	0	0	1	2.71339	0	0	1.1	2.71339	0	0	1.2	2.69118
	2.6806	0	0	4	2.6806	0	0	4.1	2.6806	0	0	4.2	2.69904	0	0	3	2.69904	0	0	3.1	2.69904	0	0	3.2	2.69438	0	0	2	2.69438	0	0	2.1	2.69438	0	0	2.2	2.71789	0	0	1	2.71789	0	0	1.1	2.71789	0	0	1.2	2.69569
	2.68185	0	0	4	2.68185	0	0	4.1	2.68185	0	0	4.2	2.70052	0	0	3	2.70052	0	0	3.1	2.70052	0	0	3.2	2.69587	0	0	2	2.69587	0	0	2.1	2.69587	0	0	2.2	2.71938	0	0	1	2.71938	0	0	1.1	2.71938	0	0	1.2	2.69718
	2.68334	0	0	4	2.68334	0	0	4.1	2.68334	0	0	4.2	2.70201	0	0	3	2.70201	0	0	3.1	2.70201	0	0	3.2	2.69735	0	0	2	2.69735	0	0	2.1	2.69735	0	0	2.2	2.72087	0	0	1	2.72087	0	0	1.1	2.72087	0	0	1.2	2.69867
	2.68455	0	0	4	2.68455	0	0	4.1	2.68455	0	0	4.2	2.70322	0	0	3	2.70322	0	0	3.1	2.70322	0	0	3.2	2.69856	0	0	2	2.69856	0	0	2.1	2.69856	0	0	2.2	2.72207	0	0	1	2.72207	0	0	1.1	2.72207	0	0	1.2	2.69988
	2.68905	0	0	4	2.68905	0	0	4.1	2.68905	0	0	4.2	2.70773	0	0	3	2.70773	0	0	3.1	2.70773	0	0	3.2	2.70306	0	0	2	2.70306	0	0	2.1	2.70306	0	0	2.2	2.72658	0	0	1	2.72658	0	0	1.1	2.72658	0	0	1.2	2.70438
	2.69031	0	0	4	2.69031	0	0	4.1	2.69031	0	0	4.2	2.70921	0	0	3	2.70921	0	0	3.1	2.70921	0	0	3.2	2.70455	0	0	2	2.70455	0	0	2.1	2.70455	0	0	2.2	2.72785	0	0	1	2.72785	0	0	1.1	2.72785	0	0	1.2	2.70587
	2.69168	0	0	4	2.69168	0	0	4.1	2.69168	0	0	4.2	2.7107	0	0	3	2.7107	0	0	3.1	2.7107	0	0	3.2	2.70604	0	0	2	2.70604	0	0	2.1	2.70604	0	0	2.2	2.72934	0	0	1	2.72934	0	0	1.1	2.72934	0	0	1.2	2.70736
	2.69288	0	0	4	2.69288	0	0	4.1	2.69288	0	0	4.2	2.7119	0	0	3	2.7119	0	0	3.1	2.7119	0	0	3.2	2.70724	0	0	2	2.70724	0	0	2.1	2.70724	0	0	2.2	2.73054	0	0	1	2.73054	0	0	1.1	2.73054	0	0	1.2	2.70857
	2.6974	0	0	4	2.6974	0	0	4.1	2.6974	0	0	4.2	2.71641	0	0	3	2.71641	0	0	3.1	2.71641	0	0	3.2	2.71175	0	0	2	2.71175	0	0	2.1	2.71175	0	0	2.2	2.73528	0	0	1	2.73528	0	0	1.1	2.73528	0	0	1.2	2.71307
	2.69865	0	0	4	2.69865	0	0	4.1	2.69865	0	0	4.2	2.7179	0	0	3	2.7179	0	0	3.1	2.7179	0	0	3.2	2.71304	0	0	2	2.71304	0	0	2.1	2.71304	0	0	2.2	2.73677	0	0	1	2.73677	0	0	1.1	2.73677	0	0	1.2	2.71456
	2.69991	0	0	4	2.69991	0	0	4.1	2.69991	0	0	4.2	2.71938	0	0	3	2.71938	0	0	3.1	2.71938	0	0	3.2	2.71452	0	0	2	2.71452	0	0	2.1	2.71452	0	0	2.2	2.73825	0	0	1	2.73825	0	0	1.1	2.73825	0	0	1.2	2.71605
	2.70111	0	0	4	2.70111	0	0	4.1	2.70111	0	0	4.2	2.72059	0	0	3	2.72059	0	0	3.1	2.72059	0	0	3.2	2.71573	0	0	2	2.71573	0	0	2.1	2.71573	0	0	2.2	2.74027	0	0	1	2.74027	0	0	1.1	2.74027	0	0	1.2	2.71726
	2.70562	0	0	4	2.70562	0	0	4.1	2.70562	0	0	4.2	2.72509	0	0	3	2.72509	0	0	3.1	2.72509	0	0	3.2	2.72024	0	0	2	2.72024	0	0	2.1	2.72024	0	0	2.2	2.74478	0	0	1	2.74478	0	0	1.1	2.74478	0	0	1.2	2.72176
	2.70688	0	0	4	2.70688	0	0	4.1	2.70688	0	0	4.2	2.72658	0	0	3	2.72658	0	0	3.1	2.72658	0	0	3.2	2.72172	0	0	2	2.72172	0	0	2.1	2.72172	0	0	2.2	2.74626	0	0	1	2.74626	0	0	1.1	2.74626	0	0	1.2	2.72325
	2.70813	0	0	4	2.70813	0	0	4.1	2.70813	0	0	4.2	2.72807	0	0	3	2.72807	0	0	3.1	2.72807	0	0	3.2	2.72321	0	0	2	2.72321	0	0	2.1	2.72321	0	0	2.2	2.74775	0	0	1	2.74775	0	0	1.1	2.74775	0	0	1.2	2.72474
	2.70934	0	0	4	2.70934	0	0	4.1	2.70934	0	0	4.2	2.72927	0	0	3	2.72927	0	0	3.1	2.72927	0	0	3.2	2.72441	0	0	2	2.72441	0	0	2.1	2.72441	0	0	2.2	2.74895	0	0	1	2.74895	0	0	1.1	2.74895	0	0	1.2	2.72594
	2.71385	0	0	4	2.71385	0	0	4.1	2.71385	0	0	4.2	2.73378	0	0	3	2.73378	0	0	3.1	2.73378	0	0	3.2	2.72892	0	0	2	2.72892	0	0	2.1	2.72892	0	0	2.2	2.75346	0	0	1	2.75346	0	0	1.1	2.75346	0	0	1.2	2.73045
	2.71511	0	0	4	2.71511	0	0	4.1	2.71511	0	0	4.2	2.73527	0	0	3	2.73527	0	0	3.1	2.73527	0	0	3.2	2.73041	0	0	2	2.73041	0	0	2.1	2.73041	0	0	2.2	2.75495	0	0	1	2.75495	0	0	1.1	2.75495	0	0	1.2	2.73194
	2.71636	0	0	4	2.71636	0	0	4.1	2.71636	0	0	4.2	2.73675	0	0	3	2.73675	0	0	3.1	2.73675	0	0	3.2	2.73191	0	0	2	2.73191	0	0	2.1	2.73191	0	0	2.2	2.75643	0	0	1	2.75643	0	0	1.1	2.75643	0	0	1.2	2.73342
	2.71757	0	0	4	2.71757	0	0	4.1	2.71757	0	0	4.2	2.73796	0	0	3	2.73796	0	0	3.1	2.73796	0	0	3.2	2.73311	0	0	2	2.73311	0	0	2.1	2.73311	0	0	2.2	2.75764	0	0	1	2.75764	0	0	1.1	2.75764	0	0	1.2	2.73463
	2.72208	0	0	4	2.72208	0	0	4.1	2.72208	0	0	4.2	2.74247	0	0	3	2.74247	0	0	3.1	2.74247	0	0	3.2	2.73762	0	0	2	2.73762	0	0	2.1	2.73762	0	0	2.2	2.76239	0	0	1	2.76239	0	0	1.1	2.76239	0	0	1.2	2.73914
	2.72333	0	0	4	2.72333	0	0	4.1	2.72333	0	0	4.2	2.74395	0	0	3	2.74395	0	0	3.1	2.74395	0	0	3.2	2.73911	0	0	2	2.73911	0	0	2.1	2.73911	0	0	2.2	2.76388	0	0	1	2.76388	0	0	1.1	2.76388	0	0	1.2	2.74062
	2.72459	0	0	4	2.72459	0	0	4.1	2.72459	0	0	4.2	2.74544	0	0	3	2.74544	0	0	3.1	2.74544	0	0	3.2	2.7406	0	0	2	2.7406	0	0	2.1	2.7406	0	0	2.2	2.76536	0	0	1	2.76536	0	0	1.1	2.76536	0	0	1.2	2.7421
	2.7258	87758	0.0377361	4.03774	2.7258	0	0	4.1	2.7258	0	0	4.2	2.74665	0	0	3	2.74665	0	0	3.1	2.74665	0	0	3.2	2.74181	0	0	2	2.74181	0	0	2.1	2.74181	0	0	2.2	2.76737	0	0	1	2.76737	0	0	1.1	2.76737	0	0	1.2	2.74331
	2.7303	0	0	4	2.7303	0	0	4.1	2.7303	0	0	4.2	2.75116	0	0	3	2.75116	0	0	3.1	2.75116	0	0	3.2	2.74654	0	0	2	2.74654	0	0	2.1	2.74654	0	0	2.2	2.77188	0	0	1	2.77188	0	0	1.1	2.77188	0	0	1.2	2.74782
	2.73156	0	0	4	2.73156	0	0	4.1	2.73156	0	0	4.2	2.75264	0	0	3	2.75264	0	0	3.1	2.75264	0	0	3.2	2.74803	0	0	2	2.74803	0	0	2.1	2.74803	0	0	2.2	2.77337	0	0	1	2.77337	0	0	1.1	2.77337	0	0	1.2	2.7493
	2.73282	0	0	4	2.73282	0	0	4.1	2.73282	0	0	4.2	2.75413	0	0	3	2.75413	0	0	3.1	2.75413	0	0	3.2	2.74951	0	0	2	2.74951	0	0	2.1	2.74951	0	0	2.2	2.77486	0	0	1	2.77486	0	0	1.1	2.77486	0	0	1.2	2.75079
	2.73402	0	0	4	2.73402	0	0	4.1	2.73402	0	0	4.2	2.75534	0	0	3	2.75534	0	0	3.1	2.75534	0	0	3.2	2.75155	0	0	2	2.75155	0	0	2.1	2.75155	0	0	2.2	2.77606	0	0	1	2.77606	0	0	1.1	2.77606	0	0	1.2	2.752
	2.73853	0	0	4	2.73853	0	0	4.1	2.73853	0	0	4.2	2.75984	0	0	3	2.75984	0	0	3.1	2.75984	0	0	3.2	2.75629	0	0	2	2.75629	0	0	2.1	2.75629	0	0	2.2	2.78057	0	0	1	2.78057	0	0	1.1	2.78057	0	0	1.2	2.75651
	2.73979	0	0	4	2.73979	0	0	4.1	2.73979	0	0	4.2	2.76134	0	0	3	2.76134	0	0	3.1	2.76134	0	0	3.2	2.75777	0	0	2	2.75777	0	0	2.1	2.75777	0	0	2.2	2.78206	0	0	1	2.78206	0	0	1.1	2.78206	0	0	1.2	2.75799
	2.74128	0	0	4	2.74128	0	0	4.1	2.74128	0	0	4.2	2.76283	0	0	3	2.76283	0	0	3.1	2.76283	0	0	3.2	2.75926	0	0	2	2.75926	0	0	2.1	2.75926	0	0	2.2	2.78354	0	0	1	2.78354	0	0	1.1	2.78354	0	0	1.2	2.75948
	2.74248	0	0	4	2.74248	0	0	4.1	2.74248	0	0	4.2	2.76403	0	0	3	2.76403	0	0	3.1	2.76403	0	0	3.2	2.76129	0	0	2	2.76129	0	0	2.1	2.76129	0	0	2.2	2.78475	0	0	1	2.78475	0	0	1.1	2.78475	0	0	1.2	2.76069
	2.74699	0	0	4	2.74699	0	0	4.1	2.74699	0	0	4.2	2.76854	0	0	3	2.76854	0	0	3.1	2.76854	0	0	3.2	2.76591	0	0	2	2.76591	0	0	2.1	2.76591	0	0	2.2	2.78926	0	0	1	2.78926	0	0	1.1	2.78926	0	0	1.2	2.7653
	2.74825	0	0	4	2.74825	0	0	4.1	2.74825	0	0	4.2	2.77003	0	0	3	2.77003	0	0	3.1	2.77003	0	0	3.2	2.76739	0	0	2	2.76739	0	0	2.1	2.76739	0	0	2.2	2.79074	0	0	1	2.79074	0	0	1.1	2.79074	0	0	1.2	2.76679
	2.74966	0	0	4	2.74966	0	0	4.1	2.74966	0	0	4.2	2.77152	0	0	3	2.77152	0	0	3.1	2.77152	0	0	3.2	2.76888	0	0	2	2.76888	0	0	2.1	2.76888	0	0	2.2	2.79223	0	0	1	2.79223	0	0	1.1	2.79223	0	0	1.2	2.76827
	2.75086	0	0	4	2.75086	0	0	4.1	2.75086	0	0	4.2	2.77272	0	0	3	2.77272	0	0	3.1	2.77272	0	0	3.2	2.77009	0	0	2	2.77009	0	0	2.1	2.77009	0	0	2.2	2.79343	0	0	1	2.79343	0	0	1.1	2.79343	0	0	1.2	2.76948
	2.75537	0	0	4	2.75537	0	0	4.1	2.75537	0	0	4.2	2.77723	0	0	3	2.77723	0	0	3.1	2.77723	0	0	3.2	2.7746	0	0	2	2.7746	0	0	2.1	2.7746	0	0	2.2	2.79794	0	0	1	2.79794	0	0	1.1	2.79794	0	0	1.2	2.77399
	2.75686	0	0	4	2.75686	0	0	4.1	2.75686	0	0	4.2	2.77872	0	0	3	2.77872	0	0	3.1	2.77872	0	0	3.2	2.77608	0	0	2	2.77608	0	0	2.1	2.77608	0	0	2.2	2.79943	0	0	1	2.79943	0	0	1.1	2.79943	0	0	1.2	2.77547
	2.75834	0	0	4	2.75834	0	0	4.1	2.75834	0	0	4.2	2.7802	0	0	3	2.7802	0	0	3.1	2.7802	0	0	3.2	2.77757	0	0	2	2.77757	0	0	2.1	2.77757	0	0	2.2	2.80078	0	0	1	2.80078	0	0	1.1	2.80078	0	0	1.2	2.77696
	2.75955	0	0	4	2.75955	0	0	4.1	2.75955	0	0	4.2	2.78141	0	0	3	2.78141	0	0	3.1	2.78141	0	0	3.2	2.77877	0	0	2	2.77877	0	0	2.1	2.77877	0	0	2.2	2.80198	0	0	1	2.80198	0	0	1.1	2.80198	0	0	1.2	2.77817
	2.76406	0	0	4	2.76406	0	0	4.1	2.76406	0	0	4.2	2.78592	0	0	3	2.78592	0	0	3.1	2.78592	0	0	3.2	2.78328	0	0	2	2.78328	0	0	2.1	2.78328	0	0	2.2	2.80649	0	0	1	2.80649	0	0	1.1	2.80649	0	0	1.2	2.78267
	2.76554	0	0	4	2.76554	0	0	4.1	2.76554	0	0	4.2	2.7873	0	0	3	2.7873	0	0	3.1	2.7873	0	0	3.2	2.78477	0	0	2	2.78477	0	0	2.1	2.78477	0	0	2.2	2.80775	0	0	1	2.80775	0	0	1.1	2.80775	0	0	1.2	2.78416
	2.76703	0	0	4	2.76703	0	0	4.1	2.76703	0	0	4.2	2.78879	0	0	3	2.78879	0	0	3.1	2.78879	0	0	3.2	2.78626	0	0	2	2.78626	0	0	2.1	2.78626	0	0	2.2	2.80901	0	0	1	2.80901	0	0	1.1	2.80901	0	0	1.2	2.78564
	2.76823	0	0	4	2.76823	0	0	4.1	2.76823	0	0	4.2	2.78999	0	0	3	2.78999	0	0	3.1	2.78999	0	0	3.2	2.78746	0	0	2	2.78746	0	0	2.1	2.78746	0	0	2.2	2.81021	0	0	1	2.81021	0	0	1.1	2.81021	0	0	1.2	2.78685
	2.77274	0	0	4	2.77274	0	0	4.1	2.77274	0	0	4.2	2.7945	0	0	3	2.7945	0	0	3.1	2.7945	0	0	3.2	2.79197	0	0	2	2.79197	0	0	2.1	2.79197	0	0	2.2	2.81472	0	0	1	2.81472	0	0	1.1	2.81472	0	0	1.2	2.79136
	2.77423	0	0	4	2.77423	0	0	4.1	2.77423	0	0	4.2	2.79601	0	0	3	2.79601	0	0	3.1	2.79601	0	0	3.2	2.79346	0	0	2	2.79346	0	0	2.1	2.79346	0	0	2.2	2.81598	0	0	1	2.81598	0	0	1.1	2.81598	0	0	1.2	2.79284
	2.77571	0	0	4	2.77571	0	0	4.1	2.77571	0	0	4.2	2.79749	0	0	3	2.79749	0	0	3.1	2.79749	0	0	3.2	2.79494	0	0	2	2.79494	0	0	2.1	2.79494	0	0	2.2	2.81746	0	0	1	2.81746	0	0	1.1	2.81746	0	0	1.2	2.79419
	2.77692	0	0	4	2.77692	0	0	4.1	2.77692	0	0	4.2	2.7987	0	0	3	2.7987	0	0	3.1	2.7987	0	0	3.2	2.79615	0	0	2	2.79615	0	0	2.1	2.79615	0	0	2.2	2.81867	0	0	1	2.81867	0	0	1.1	2.81867	0	0	1.2	2.7954
	2.78142	0	0	4	2.78142	0	0	4.1	2.78142	0	0	4.2	2.80321	0	0	3	2.80321	0	0	3.1	2.80321	0	0	3.2	2.80088	0	0	2	2.80088	0	0	2.1	2.80088	0	0	2.2	2.82318	0	0	1	2.82318	0	0	1.1	2.82318	0	0	1.2	2.79991
	2.78268	0	0	4	2.78268	0	0	4.1	2.78268	0	0	4.2	2.80447	0	0	3	2.80447	0	0	3.1	2.80447	0	0	3.2	2.80237	0	0	2	2.80237	0	0	2.1	2.80237	0	0	2.2	2.82443	0	0	1	2.82443	0	0	1.1	2.82443	0	0	1.2	2.80139
	2.78417	0	0	4	2.78417	0	0	4.1	2.78417	0	0	4.2	2.80572	0	0	3	2.80572	0	0	3.1	2.80572	0	0	3.2	2.80386	0	0	2	2.80386	0	0	2.1	2.80386	0	0	2.2	2.82577	0	0	1	2.82577	0	0	1.1	2.82577	0	0	1.2	2.80288
	2.78537	0	0	4	2.78537	0	0	4.1	2.78537	0	0	4.2	2.80693	0	0	3	2.80693	0	0	3.1	2.80693	0	0	3.2	2.80588	0	0	2	2.80588	0	0	2.1	2.80588	0	0	2.2	2.82698	0	0	1	2.82698	0	0	1.1	2.82698	0	0	1.2	2.80408
	2.78988	0	0	4	2.78988	0	0	4.1	2.78988	0	0	4.2	2.81144	0	0	3	2.81144	0	0	3.1	2.81144	0	0	3.2	2.81038	0	0	2	2.81038	0	0	2.1	2.81038	0	0	2.2	2.83148	0	0	1	2.83148	0	0	1.1	2.83148	0	0	1.2	2.80859
	2.79137	0	0	4	2.79137	0	0	4.1	2.79137	0	0	4.2	2.81269	0	0	3	2.81269	0	0	3.1	2.81269	0	0	3.2	2.81187	0	0	2	2.81187	0	0	2.1	2.81187	0	0	2.2	2.83297	0	0	1	2.83297	0	0	1.1	2.83297	0	0	1.2	2.81008
	2.79286	0	0	4	2.79286	0	0	4.1	2.79286	0	0	4.2	2.81395	0	0	3	2.81395	0	0	3.1	2.81395	0	0	3.2	2.81336	0	0	2	2.81336	0	0	2.1	2.81336	0	0	2.2	2.83432	0	0	1	2.83432	0	0	1.1	2.83432	0	0	1.2	2.81156
	2.79406	0	0	4	2.79406	0	0	4.1	2.79406	0	0	4.2	2.81516	0	0	3	2.81516	0	0	3.1	2.81516	0	0	3.2	2.81456	0	0	2	2.81456	0	0	2.1	2.81456	0	0	2.2	2.83553	0	0	1	2.83553	0	0	1.1	2.83553	0	0	1.2	2.81277
	2.79857	0	0	4	2.79857	0	0	4.1	2.79857	0	0	4.2	2.81966	0	0	3	2.81966	0	0	3.1	2.81966	0	0	3.2	2.81907	0	0	2	2.81907	0	0	2.1	2.81907	0	0	2.2	2.84003	0	0	1	2.84003	0	0	1.1	2.84003	0	0	1.2	2.81728
	2.80006	0	0	4	2.80006	0	0	4.1	2.80006	0	0	4.2	2.82115	0	0	3	2.82115	0	0	3.1	2.82115	0	0	3.2	2.82056	0	0	2	2.82056	0	0	2.1	2.82056	0	0	2.2	2.84129	0	0	1	2.84129	0	0	1.1	2.84129	0	0	1.2	2.81876
	2.80131	0	0	4	2.80131	0	0	4.1	2.80131	0	0	4.2	2.82241	0	0	3	2.82241	0	0	3.1	2.82241	0	0	3.2	2.82204	0	0	2	2.82204	0	0	2.1	2.82204	0	0	2.2	2.84255	0	0	1	2.84255	0	0	1.1	2.84255	0	0	1.2	2.82025
	2.80252	0	0	4	2.80252	0	0	4.1	2.80252	27061.2	0.000225	4.20022	2.82361	0	0	3	2.82361	0	0	3.1	2.82361	0	0	3.2	2.82325	0	0	2	2.82325	0	0	2.1	2.82325	0	0	2.2	2.84375	0	0	1	2.84375	0	0	1.1	2.84375	0	0	1.2	2.82146
	2.80703	0	0	4	2.80703	0	0	4.1	2.80703	0	0	4.2	2.82812	0	0	3	2.82812	0	0	3.1	2.82812	0	0	3.2	2.82786	0	0	2	2.82786	0	0	2.1	2.82786	0	0	2.2	2.84826	0	0	1	2.84826	0	0	1.1	2.84826	0	0	1.2	2.82619
	2.80851	0	0	4	2.80851	0	0	4.1	2.80851	0	0	4.2	2.82938	0	0	3	2.82938	0	0	3.1	2.82938	0	0	3.2	2.82935	0	0	2	2.82935	0	0	2.1	2.82935	0	0	2.2	2.84952	0	0	1	2.84952	0	0	1.1	2.84952	0	0	1.2	2.8276
	2.81	0	0	4	2.81	0	0	4.1	2.81	0	0	4.2	2.83087	0	0	3	2.83087	0	0	3.1	2.83087	0	0	3.2	2.83083	0	0	2	2.83083	0	0	2.1	2.83083	0	0	2.2	2.85078	0	0	1	2.85078	0	0	1.1	2.85078	0	0	1.2	2.82909
	2.8112	0	0	4	2.8112	0	0	4.1	2.8112	0	0	4.2	2.83207	0	0	3	2.83207	0	0	3.1	2.83207	0	0	3.2	2.8328	0	0	2	2.8328	0	0	2.1	2.8328	0	0	2.2	2.85198	0	0	1	2.85198	0	0	1.1	2.85198	0	0	1.2	2.83103
	2.81571	0	0	4	2.81571	0	0	4.1	2.81571	0	0	4.2	2.83658	0	0	3	2.83658	0	0	3.1	2.83658	0	0	3.2	2.83731	0	0	2	2.83731	0	0	2.1	2.83731	0	0	2.2	2.85649	0	0	1	2.85649	0	0	1.1	2.85649	0	0	1.2	2.83554
	2.8172	0	0	4	2.8172	0	0	4.1	2.8172	0	0	4.2	2.83784	0	0	3	2.83784	0	0	3.1	2.83784	0	0	3.2	2.8388	0	0	2	2.8388	0	0	2.1	2.8388	0	0	2.2	2.85775	0	0	1	2.85775	0	0	1.1	2.85775	0	0	1.2	2.83703
	2.81868	0	0	4	2.81868	0	0	4.1	2.81868	0	0	4.2	2.83909	0	0	3	2.83909	0	0	3.1	2.83909	0	0	3.2	2.84028	0	0	2	2.84028	0	0	2.1	2.84028	0	0	2.2	2.859	0	0	1	2.859	0	0	1.1	2.859	0	0	1.2	2.83852
	2.81989	0	0	4	2.81989	0	0	4.1	2.81989	0	0	4.2	2.8403	0	0	3	2.8403	0	0	3.1	2.8403	0	0	3.2	2.84149	0	0	2	2.84149	0	0	2.1	2.84149	0	0	2.2	2.86021	0	0	1	2.86021	0	0	1.1	2.86021	0	0	1.2	2.83972
	2.8244	0	0	4	2.8244	0	0	4.1	2.8244	0	0	4.2	2.84481	0	0	3	2.84481	0	0	3.1	2.84481	0	0	3.2	2.84684	0	0	2	2.84684	0	0	2.1	2.84684	0	0	2.2	2.86472	0	0	1	2.86472	0	0	1.1	2.86472	0	0	1.2	2.84423
	2.82588	0	0	4	2.82588	0	0	4.1	2.82588	0	0	4.2	2.84606	0	0	3	2.84606	0	0	3.1	2.84606	0	0	3.2	2.84809	0	0	2	2.84809	0	0	2.1	2.84809	0	0	2.2	2.86597	0	0	1	2.86597	0	0	1.1	2.86597	0	0	1.2	2.84549
	2.82737	0	0	4	2.82737	0	0	4.1	2.82737	0	0	4.2	2.84732	0	0	3	2.84732	0	0	3.1	2.84732	0	0	3.2	2.84935	0	0	2	2.84935	0	0	2.1	2.84935	0	0	2.2	2.86723	0	0	1	2.86723	0	0	1.1	2.86723	0	0	1.2	2.84697
	2.82857	0	0	4	2.82857	0	0	4.1	2.82857	0	0	4.2	2.84853	0	0	3	2.84853	0	0	3.1	2.84853	0	0	3.2	2.85056	0	0	2	2.85056	0	0	2.1	2.85056	0	0	2.2	2.86843	0	0	1	2.86843	0	0	1.1	2.86843	0	0	1.2	2.84818
	2.83308	0	0	4	2.83308	0	0	4.1	2.83308	0	0	4.2	2.85303	0	0	3	2.85303	0	0	3.1	2.85303	0	0	3.2	2.85506	0	0	2	2.85506	0	0	2.1	2.85506	0	0	2.2	2.87294	0	0	1	2.87294	0	0	1.1	2.87294	0	0	1.2	2.85269
	2.83457	0	0	4	2.83457	0	0	4.1	2.83457	0	0	4.2	2.85429	0	0	3	2.85429	0	0	3.1	2.85429	0	0	3.2	2.85632	0	0	2	2.85632	0	0	2.1	2.85632	0	0	2.2	2.8742	0	0	1	2.8742	0	0	1.1	2.8742	0	0	1.2	2.85394
	2.83605	0	0	4	2.83605	0	0	4.1	2.83605	0	0	4.2	2.85555	0	0	3	2.85555	0	0	3.1	2.85555	0	0	3.2	2.85758	0	0	2	2.85758	0	0	2.1	2.85758	0	0	2.2	2.87552	0	0	1	2.87552	0	0	1.1	2.87552	0	0	1.2	2.8552
	2.83726	0	0	4	2.83726	0	0	4.1	2.83726	0	0	4.2	2.85675	0	0	3	2.85675	0	0	3.1	2.85675	0	0	3.2	2.85878	0	0	2	2.85878	0	0	2.1	2.85878	0	0	2.2	2.87673	0	0	1	2.87673	0	0	1.1	2.87673	0	0	1.2	2.85641
	2.842	0	0	4	2.842	0	0	4.1	2.842	0	0	4.2	2.86126	0	0	3	2.86126	0	0	3.1	2.86126	0	0	3.2	2.86329	0	0	2	2.86329	0	0	2.1	2.86329	0	0	2.2	2.88124	0	0	1	2.88124	0	0	1.1	2.88124	0	0	1.2	2.86091
	2.84348	0	0	4	2.84348	0	0	4.1	2.84348	0	0	4.2	2.86252	0	0	3	2.86252	0	0	3.1	2.86252	0	0	3.2	2.86455	0	0	2	2.86455	0	0	2.1	2.86455	0	0	2.2	2.88263	0	0	1	2.88263	0	0	1.1	2.88263	0	0	1.2	2.86217
	2.84497	0	0	4	2.84497	0	0	4.1	2.84497	0	0	4.2	2.86378	0	0	3	2.86378	0	0	3.1	2.86378	0	0	3.2	2.86581	0	0	2	2.86581	0	0	2.1	2.86581	0	0	2.2	2.88388	0	0	1	2.88388	0	0	1.1	2.88388	0	0	1.2	2.86343
	2.84704	0	0	4	2.84704	0	0	4.1	2.84704	0	0	4.2	2.86498	0	0	3	2.86498	0	0	3.1	2.86498	0	0	3.2	2.86701	0	0	2	2.86701	0	0	2.1	2.86701	0	0	2.2	2.88509	0	0	1	2.88509	0	0	1.1	2.88509	0	0	1.2	2.86463
	2.85155	0	0	4	2.85155	0	0	4.1	2.85155	0	0	4.2	2.86949	0	0	3	2.86949	0	0	3.1	2.86949	0	0	3.2	2.87152	0	0	2	2.87152	0	0	2.1	2.87152	0	0	2.2	2.8896	0	0	1	2.8896	0	0	1.1	2.8896	0	0	1.2	2.86914
	2.85303	0	0	4	2.85303	0	0	4.1	2.85303	0	0	4.2	2.87074	0	0	3	2.87074	0	0	3.1	2.87074	0	0	3.2	2.87278	0	0	2	2.87278	0	0	2.1	2.87278	0	0	2.2	2.89085	0	0	1	2.89085	0	0	1.1	2.89085	0	0	1.2	2.8704
	2.85452	0	0	4	2.85452	0	0	4.1	2.85452	0	0	4.2	2.872	0	0	3	2.872	0	0	3.1	2.872	0	0	3.2	2.87403	0	0	2	2.87403	0	0	2.1	2.87403	0	0	2.2	2.89234	0	0	1	2.89234	0	0	1.1	2.89234	0	0	1.2	2.87165
	2.85572	0	0	4	2.85572	0	0	4.1	2.85572	0	0	4.2	2.87321	0	0	3	2.87321	0	0	3.1	2.87321	0	0	3.2	2.87524	0	0	2	2.87524	0	0	2.1	2.87524	0	0	2.2	2.89354	0	0	1	2.89354	0	0	1.1	2.89354	0	0	1.2	2.87286
	2.86023	0	0	4	2.86023	0	0	4.1	2.86023	0	0	4.2	2.87772	0	0	3	2.87772	0	0	3.1	2.87772	0	0	3.2	2.87975	0	0	2	2.87975	0	0	2.1	2.87975	0	0	2.2	2.89806	0	0	1	2.89806	0	0	1.1	2.89806	0	0	1.2	2.87737
	2.86172	0	0	4	2.86172	0	0	4.1	2.86172	0	0	4.2	2.87897	0	0	3	2.87897	0	0	3.1	2.87897	0	0	3.2	2.881	0	0	2	2.881	0	0	2.1	2.881	0	0	2.2	2.89954	0	0	1	2.89954	0	0	1.1	2.89954	0	0	1.2	2.87863
	2.8632	0	0	4	2.8632	0	0	4.1	2.8632	0	0	4.2	2.88023	0	0	3	2.88023	0	0	3.1	2.88023	0	0	3.2	2.88226	0	0	2	2.88226	0	0	2.1	2.88226	0	0	2.2	2.90103	0	0	1	2.90103	0	0	1.1	2.90103	0	0	1.2	2.87988
	2.86441	0	0	4	2.86441	0	0	4.1	2.86441	0	0	4.2	2.88143	0	0	3	2.88143	0	0	3.1	2.88143	0	0	3.2	2.88346	0	0	2	2.88346	0	0	2.1	2.88346	0	0	2.2	2.90223	0	0	1	2.90223	0	0	1.1	2.90223	0	0	1.2	2.88109
	2.86892	0	0	4	2.86892	0	0	4.1	2.86892	0	0	4.2	2.88594	0	0	3	2.88594	0	0	3.1	2.88594	0	0	3.2	2.88797	0	0	2	2.88797	0	0	2.1	2.88797	0	0	2.2	2.90674	0	0	1	2.90674	0	0	1.1	2.90674	0	0	1.2	2.8856
	2.8704	0	0	4	2.8704	0	0	4.1	2.8704	0	0	4.2	2.88743	0	0	3	2.88743	0	0	3.1	2.88743	0	0	3.2	2.88923	0	0	2	2.88923	0	0	2.1	2.88923	0	0	2.2	2.90822	0	0	1	2.90822	0	0	1.1	2.90822	0	0	1.2	2.88685
	2.87189	0	0	4	2.87189	0	0	4.1	2.87189	0	0	4.2	2.88869	0	0	3	2.88869	0	0	3.1	2.88869	0	0	3.2	2.89049	0	0	2	2.89049	0	0	2.1	2.89049	0	0	2.2	2.90971	0	0	1	2.90971	0	0	1.1	2.90971	0	0	1.2	2.88811
	2.87309	0	0	4	2.87309	0	0	4.1	2.87309	0	0	4.2	2.88989	0	0	3	2.88989	0	0	3.1	2.88989	0	0	3.2	2.89169	0	0	2	2.89169	0	0	2.1	2.89169	0	0	2.2	2.91092	0	0	1	2.91092	0	0	1.1	2.91092	0	0	1.2	2.88932
	2.8776	0	0	4	2.8776	0	0	4.1	2.8776	0	0	4.2	2.8944	0	0	3	2.8944	0	0	3.1	2.8944	0	0	3.2	2.8962	0	0	2	2.8962	0	0	2.1	2.8962	0	0	2.2	2.91542	0	0	1	2.91542	0	0	1.1	2.91542	0	0	1.2	2.89382
	2.87886	0	0	4	2.87886	0	0	4.1	2.87886	0	0	4.2	2.89566	0	0	3	2.89566	0	0	3.1	2.89566	0	0	3.2	2.89746	0	0	2	2.89746	0	0	2.1	2.89746	0	0	2.2	2.91668	0	0	1	2.91668	0	0	1.1	2.91668	0	0	1.2	2.89508
	2.88034	0	0	4	2.88034	0	0	4.1	2.88034	0	0	4.2	2.89714	0	0	3	2.89714	0	0	3.1	2.89714	0	0	3.2	2.89871	0	0	2	2.89871	0	0	2.1	2.89871	0	0	2.2	2.91817	0	0	1	2.91817	0	0	1.1	2.91817	0	0	1.2	2.89634
	2.88155	0	0	4	2.88155	0	0	4.1	2.88155	0	0	4.2	2.89835	0	0	3	2.89835	0	0	3.1	2.89835	0	0	3.2	2.89992	0	0	2	2.89992	0	0	2.1	2.89992	0	0	2.2	2.91937	0	0	1	2.91937	0	0	1.1	2.91937	0	0	1.2	2.89754
	2.88606	0	0	4	2.88606	0	0	4.1	2.88606	0	0	4.2	2.90286	0	0	3	2.90286	0	0	3.1	2.90286	0	0	3.2	2.90443	0	0	2	2.90443	0	0	2.1	2.90443	0	0	2.2	2.92388	0	0	1	2.92388	0	0	1.1	2.92388	0	0	1.2	2.90205
	2.88754	0	0	4	2.88754	0	0	4.1	2.88754	0	0	4.2	2.90434	0	0	3	2.90434	0	0	3.1	2.90434	0	0	3.2	2.90568	0	0	2	2.90568	0	0	2.1	2.90568	0	0	2.2	2.92537	0	0	1	2.92537	0	0	1.1	2.92537	0	0	1.2	2.90331
	2.88903	0	0	4	2.88903	0	0	4.1	2.88903	0	0	4.2	2.90583	0	0	3	2.90583	0	0	3.1	2.90583	0	0	3.2	2.90694	0	0	2	2.90694	0	0	2.1	2.90694	0	0	2.2	2.92686	0	0	1	2.92686	0	0	1.1	2.92686	0	0	1.2	2.90457
	2.89024	0	0	4	2.89024	0	0	4.1	2.89024	0	0	4.2	2.90703	0	0	3	2.90703	0	0	3.1	2.90703	0	0	3.2	2.90815	0	0	2	2.90815	0	0	2.1	2.90815	0	0	2.2	2.92806	0	0	1	2.92806	0	0	1.1	2.92806	0	0	1.2	2.90577
	2.89475	0	0	4	2.89475	0	0	4.1	2.89475	0	0	4.2	2.91154	0	0	3	2.91154	0	0	3.1	2.91154	0	0	3.2	2.91266	0	0	2	2.91266	0	0	2.1	2.91266	0	0	2.2	2.93257	0	0	1	2.93257	0	0	1.1	2.93257	0	0	1.2	2.91028
	2.896	0	0	4	2.896	0	0	4.1	2.896	0	0	4.2	2.91303	0	0	3	2.91303	0	0	3.1	2.91303	0	0	3.2	2.91414	0	0	2	2.91414	0	0	2.1	2.91414	0	0	2.2	2.93405	0	0	1	2.93405	0	0	1.1	2.93405	0	0	1.2	2.91153
	2.89749	0	0	4	2.89749	0	0	4.1	2.89749	0	0	4.2	2.91452	0	0	3	2.91452	0	0	3.1	2.91452	0	0	3.2	2.91563	0	0	2	2.91563	0	0	2.1	2.91563	0	0	2.2	2.93531	0	0	1	2.93531	0	0	1.1	2.93531	0	0	1.2	2.91279
	2.89869	0	0	4	2.89869	0	0	4.1	2.89869	0	0	4.2	2.91572	0	0	3	2.91572	0	0	3.1	2.91572	0	0	3.2	2.91683	0	0	2	2.91683	0	0	2.1	2.91683	0	0	2.2	2.93652	0	0	1	2.93652	0	0	1.1	2.93652	0	0	1.2	2.914
	2.9032	0	0	4	2.9032	0	0	4.1	2.9032	0	0	4.2	2.92023	0	0	3	2.92023	0	0	3.1	2.92023	0	0	3.2	2.92134	0	0	2	2.92134	0	0	2.1	2.92134	0	0	2.2	2.94103	0	0	1	2.94103	0	0	1.1	2.94103	0	0	1.2	2.91851
	2.90469	0	0	4	2.90469	0	0	4.1	2.90469	0	0	4.2	2.92172	0	0	3	2.92172	0	0	3.1	2.92172	0	0	3.2	2.9226	0	0	2	2.9226	0	0	2.1	2.9226	0	0	2.2	2.94252	0	0	1	2.94252	0	0	1.1	2.94252	0	0	1.2	2.91985
	2.90618	0	0	4	2.90618	0	0	4.1	2.90618	0	0	4.2	2.92297	0	0	3	2.92297	0	0	3.1	2.92297	0	0	3.2	2.92409	0	0	2	2.92409	0	0	2.1	2.92409	0	0	2.2	2.944	0	0	1	2.944	0	0	1.1	2.944	0	0	1.2	2.92134
	2.90738	0	0	4	2.90738	0	0	4.1	2.90738	0	0	4.2	2.92418	0	0	3	2.92418	0	0	3.1	2.92418	0	0	3.2	2.92529	0	0	2	2.92529	0	0	2.1	2.92529	0	0	2.2	2.94521	0	0	1	2.94521	0	0	1.1	2.94521	0	0	1.2	2.92255
	2.91189	0	0	4	2.91189	0	0	4.1	2.91189	0	0	4.2	2.93081	0	0	3	2.93081	0	0	3.1	2.93081	0	0	3.2	2.9298	0	0	2	2.9298	0	0	2.1	2.9298	0	0	2.2	2.94972	0	0	1	2.94972	0	0	1.1	2.94972	0	0	1.2	2.92706
	2.91338	0	0	4	2.91338	0	0	4.1	2.91338	0	0	4.2	2.93229	0	0	3	2.93229	0	0	3.1	2.93229	0	0	3.2	2.93129	0	0	2	2.93129	0	0	2.1	2.93129	0	0	2.2	2.95121	0	0	1	2.95121	0	0	1.1	2.95121	0	0	1.2	2.92831
	2.91486	0	0	4	2.91486	0	0	4.1	2.91486	0	0	4.2	2.93378	0	0	3	2.93378	0	0	3.1	2.93378	0	0	3.2	2.93278	0	0	2	2.93278	0	0	2.1	2.93278	0	0	2.2	2.95269	0	0	1	2.95269	0	0	1.1	2.95269	0	0	1.2	2.9298
	2.91607	0	0	4	2.91607	0	0	4.1	2.91607	0	0	4.2	2.93498	0	0	3	2.93498	0	0	3.1	2.93498	35712.1	0.000296928	3.2003	2.93398	0	0	2	2.93398	0	0	2.1	2.93398	0	0	2.2	2.9539	0	0	1	2.9539	0	0	1.1	2.9539	0	0	1.2	2.93101
	2.92058	0	0	4	2.92058	0	0	4.1	2.92058	0	0	4.2	2.93949	0	0	3	2.93949	0	0	3.1	2.93949	0	0	3.2	2.93849	0	0	2	2.93849	0	0	2.1	2.93849	0	0	2.2	2.95841	0	0	1	2.95841	0	0	1.1	2.95841	0	0	1.2	2.93551
	2.92184	0	0	4	2.92184	0	0	4.1	2.92184	0	0	4.2	2.94098	0	0	3	2.94098	0	0	3.1	2.94098	0	0	3.2	2.93997	0	0	2	2.93997	0	0	2.1	2.93997	0	0	2.2	2.95989	0	0	1	2.95989	0	0	1.1	2.95989	0	0	1.2	2.937
	2.92333	0	0	4	2.92333	0	0	4.1	2.92333	0	0	4.2	2.94247	0	0	3	2.94247	0	0	3.1	2.94247	0	0	3.2	2.94146	0	0	2	2.94146	0	0	2.1	2.94146	0	0	2.2	2.96138	0	0	1	2.96138	0	0	1.1	2.96138	0	0	1.2	2.93849
	2.92453	0	0	4	2.92453	0	0	4.1	2.92453	0	0	4.2	2.94367	0	0	3	2.94367	0	0	3.1	2.94367	0	0	3.2	2.94267	0	0	2	2.94267	0	0	2.1	2.94267	0	0	2.2	2.96343	0	0	1	2.96343	0	0	1.1	2.96343	0	0	1.2	2.93969
	2.93117	0	0	4	2.93117	0	0	4.1	2.93117	0	0	4.2	2.94841	0	0	3	2.94841	0	0	3.1	2.94841	0	0	3.2	2.94717	0	0	2	2.94717	0	0	2.1	2.94717	0	0	2.2	2.96794	0	0	1	2.96794	0	0	1.1	2.96794	0	0	1.2	2.9442
	2.93266	0	0	4	2.93266	0	0	4.1	2.93266	0	0	4.2	2.9499	0	0	3	2.9499	0	0	3.1	2.9499	0	0	3.2	2.94843	0	0	2	2.94843	0	0	2.1	2.94843	0	0	2.2	2.96942	0	0	1	2.96942	0	0	1.1	2.96942	0	0	1.2	2.94569
	2.93414	0	0	4	2.93414	0	0	4.1	2.93414	0	0	4.2	2.95138	0	0	3	2.95138	0	0	3.1	2.95138	0	0	3.2	2.94992	0	0	2	2.94992	0	0	2.1	2.94992	0	0	2.2	2.97091	0	0	1	2.97091	0	0	1.1	2.97091	0	0	1.2	2.94717
	2.93535	0	0	4	2.93535	0	0	4.1	2.93535	0	0	4.2	2.95343	0	0	3	2.95343	0	0	3.1	2.95343	0	0	3.2	2.95112	0	0	2	2.95112	0	0	2.1	2.95112	0	0	2.2	2.97211	0	0	1	2.97211	0	0	1.1	2.97211	0	0	1.2	2.94838
	2.94008	0	0	4	2.94008	0	0	4.1	2.94008	0	0	4.2	2.95794	0	0	3	2.95794	0	0	3.1	2.95794	0	0	3.2	2.95563	0	0	2	2.95563	0	0	2.1	2.95563	0	0	2.2	2.97662	0	0	1	2.97662	0	0	1.1	2.97662	0	0	1.2	2.95289
	2.94134	0	0	4	2.94134	0	0	4.1	2.94134	0	0	4.2	2.9592	0	0	3	2.9592	0	0	3.1	2.9592	0	0	3.2	2.95712	0	0	2	2.95712	0	0	2.1	2.95712	0	0	2.2	2.97811	0	0	1	2.97811	0	0	1.1	2.97811	0	0	1.2	2.95437
	2.94283	0	0	4	2.94283	0	0	4.1	2.94283	0	0	4.2	2.96069	0	0	3	2.96069	0	0	3.1	2.96069	0	0	3.2	2.95862	0	0	2	2.95862	0	0	2.1	2.95862	0	0	2.2	2.97959	0	0	1	2.97959	0	0	1.1	2.97959	0	0	1.2	2.95586
	2.94494	0	0	4	2.94494	0	0	4.1	2.94494	0	0	4.2	2.96189	0	0	3	2.96189	0	0	3.1	2.96189	0	0	3.2	2.95983	0	0	2	2.95983	0	0	2.1	2.95983	0	0	2.2	2.9808	0	0	1	2.9808	0	0	1.1	2.9808	0	0	1.2	2.95706
	2.94945	0	0	4	2.94945	0	0	4.1	2.94945	0	0	4.2	2.9664	0	0	3	2.9664	0	0	3.1	2.9664	0	0	3.2	2.96434	0	0	2	2.96434	0	0	2.1	2.96434	0	0	2.2	2.98531	0	0	1	2.98531	0	0	1.1	2.98531	0	0	1.2	2.96157
	2.95093	0	0	4	2.95093	0	0	4.1	2.95093	0	0	4.2	2.96788	0	0	3	2.96788	0	0	3.1	2.96788	0	0	3.2	2.96582	0	0	2	2.96582	0	0	2.1	2.96582	0	0	2.2	2.98679	0	0	1	2.98679	0	0	1.1	2.98679	0	0	1.2	2.96306
	2.95242	0	0	4	2.95242	0	0	4.1	2.95242	0	0	4.2	2.96937	0	0	3	2.96937	0	0	3.1	2.96937	0	0	3.2	2.96731	0	0	2	2.96731	0	0	2.1	2.96731	0	0	2.2	2.98828	0	0	1	2.98828	0	0	1.1	2.98828	0	0	1.2	2.96454
	2.95363	0	0	4	2.95363	0	0	4.1	2.95363	0	0	4.2	2.97058	0	0	3	2.97058	0	0	3.1	2.97058	0	0	3.2	2.96851	0	0	2	2.96851	0	0	2.1	2.96851	0	0	2.2	2.98948	0	0	1	2.98948	0	0	1.1	2.98948	0	0	1.2	2.96575
	2.95813	0	0	4	2.95813	0	0	4.1	2.95813	0	0	4.2	2.97531	0	0	3	2.97531	0	0	3.1	2.97531	0	0	3.2	2.97325	0	0	2	2.97325	0	0	2.1	2.97325	0	0	2.2	2.99399	0	0	1	2.99399	0	0	1.1	2.99399	0	0	1.2	2.97049
	2.95962	0	0	4	2.95962	0	0	4.1	2.95962	0	0	4.2	2.9768	0	0	3	2.9768	0	0	3.1	2.9768	0	0	3.2	2.97474	0	0	2	2.97474	0	0	2.1	2.97474	0	0	2.2	2.99548	0	0	1	2.99548	0	0	1.1	2.99548	0	0	1.2	2.97197
	2.96111	0	0	4	2.96111	0	0	4.1	2.96111	0	0	4.2	2.97828	0	0	3	2.97828	0	0	3.1	2.97828	0	0	3.2	2.97622	0	0	2	2.97622	0	0	2.1	2.97622	0	0	2.2	2.99696	0	0	1	2.99696	0	0	1.1	2.99696	0	0	1.2	2.97346
	2.96231	26727.1	0.0114927	4.01149	2.96231	0	0	4.1	2.96231	0	0	4.2	2.98035	0	0	3	2.98035	0	0	3.1	2.98035	0	0	3.2	2.97827	0	0	2	2.97827	0	0	2.1	2.97827	0	0	2.2	2.99904	0	0	1	2.99904	0	0	1.1	2.99904	0	0	1.2	2.9755
	2.96705	0	0	4	2.96705	0	0	4.1	2.96705	0	0	4.2	2.98509	0	0	3	2.98509	0	0	3.1	2.98509	0	0	3.2	2.98301	0	0	2	2.98301	0	0	2.1	2.98301	0	0	2.2	3.00355	0	0	1	3.00355	0	0	1.1	3.00355	0	0	1.2	2.98001
	2.96853	0	0	4	2.96853	0	0	4.1	2.96853	0	0	4.2	2.98657	0	0	3	2.98657	0	0	3.1	2.98657	0	0	3.2	2.98449	0	0	2	2.98449	0	0	2.1	2.98449	0	0	2.2	3.00504	0	0	1	3.00504	0	0	1.1	3.00504	0	0	1.2	2.98149
	2.97002	0	0	4	2.97002	0	0	4.1	2.97002	0	0	4.2	2.98805	0	0	3	2.98805	0	0	3.1	2.98805	0	0	3.2	2.98598	0	0	2	2.98598	0	0	2.1	2.98598	0	0	2.2	3.00653	0	0	1	3.00653	0	0	1.1	3.00653	0	0	1.2	2.98298
	2.97214	0	0	4	2.97214	0	0	4.1	2.97214	0	0	4.2	2.99012	0	0	3	2.99012	0	0	3.1	2.99012	0	0	3.2	2.98803	0	0	2	2.98803	0	0	2.1	2.98803	0	0	2.2	3.00773	0	0	1	3.00773	0	0	1.1	3.00773	0	0	1.2	2.98418
	2.97688	0	0	4	2.97688	0	0	4.1	2.97688	0	0	4.2	2.99463	0	0	3	2.99463	0	0	3.1	2.99463	0	0	3.2	2.99253	0	0	2	2.99253	0	0	2.1	2.99253	0	0	2.2	3.01234	0	0	1	3.01234	0	0	1.1	3.01234	0	0	1.2	2.98892
	2.97837	0	0	4	2.97837	0	0	4.1	2.97837	0	0	4.2	2.99611	0	0	3	2.99611	0	0	3.1	2.99611	0	0	3.2	2.99402	0	0	2	2.99402	0	0	2.1	2.99402	0	0	2.2	3.0136	0	0	1	3.0136	0	0	1.1	3.0136	0	0	1.2	2.99041
	2.97985	0	0	4	2.97985	0	0	4.1	2.97985	0	0	4.2	2.9976	0	0	3	2.9976	0	0	3.1	2.9976	0	0	3.2	2.99551	0	0	2	2.99551	0	0	2.1	2.99551	0	0	2.2	3.01508	0	0	1	3.01508	0	0	1.1	3.01508	0	0	1.2	2.99189
	2.98197	0	0	4	2.98197	0	0	4.1	2.98197	0	0	4.2	2.9988	0	0	3	2.9988	0	0	3.1	2.9988	0	0	3.2	2.99671	0	0	2	2.99671	0	0	2.1	2.99671	0	0	2.2	3.01629	0	0	1	3.01629	0	0	1.1	3.01629	0	0	1.2	2.99394
	2.98648	0	0	4	2.98648	0	0	4.1	2.98648	0	0	4.2	3.00331	0	0	3	3.00331	0	0	3.1	3.00331	0	0	3.2	3.00122	0	0	2	3.00122	0	0	2.1	3.00122	0	0	2.2	3.0208	0	0	1	3.0208	0	0	1.1	3.0208	0	0	1.2	2.99845
	2.98797	0	0	4	2.98797	0	0	4.1	2.98797	0	0	4.2	3.00457	0	0	3	3.00457	0	0	3.1	3.00457	0	0	3.2	3.00271	0	0	2	3.00271	0	0	2.1	3.00271	0	0	2.2	3.02228	0	0	1	3.02228	0	0	1.1	3.02228	0	0	1.2	2.99994
	2.98945	0	0	4	2.98945	0	0	4.1	2.98945	0	0	4.2	3.00605	0	0	3	3.00605	0	0	3.1	3.00605	0	0	3.2	3.00419	0	0	2	3.00419	0	0	2.1	3.00419	0	0	2.2	3.02377	0	0	1	3.02377	0	0	1.1	3.02377	0	0	1.2	3.00142
	2.99066	0	0	4	2.99066	0	0	4.1	2.99066	0	0	4.2	3.00726	0	0	3	3.00726	0	0	3.1	3.00726	0	0	3.2	3.0054	0	0	2	3.0054	0	0	2.1	3.0054	0	0	2.2	3.02497	0	0	1	3.02497	0	0	1.1	3.02497	0	0	1.2	3.00263
	2.99517	0	0	4	2.99517	0	0	4.1	2.99517	0	0	4.2	3.01389	0	0	3	3.01389	0	0	3.1	3.01389	0	0	3.2	3.01156	0	0	2	3.01156	0	0	2.1	3.01156	0	0	2.2	3.02948	0	0	1	3.02948	0	0	1.1	3.02948	0	0	1.2	3.00737
	2.99666	0	0	4	2.99666	0	0	4.1	2.99666	0	0	4.2	3.01537	0	0	3	3.01537	0	0	3.1	3.01537	0	0	3.2	3.01304	0	0	2	3.01304	0	0	2.1	3.01304	0	0	2.2	3.03097	0	0	1	3.03097	0	0	1.1	3.03097	0	0	1.2	3.00885
	2.99814	0	0	4	2.99814	0	0	4.1	2.99814	0	0	4.2	3.01686	0	0	3	3.01686	0	0	3.1	3.01686	0	0	3.2	3.01453	0	0	2	3.01453	0	0	2.1	3.01453	0	0	2.2	3.03246	0	0	1	3.03246	0	0	1.1	3.03246	0	0	1.2	3.01034
	2.99935	0	0	4	2.99935	0	0	4.1	2.99935	16203.2	0.000134722	4.20013	3.01806	0	0	3	3.01806	0	0	3.1	3.01806	0	0	3.2	3.01573	0	0	2	3.01573	0	0	2.1	3.01573	0	0	2.2	3.03366	0	0	1	3.03366	0	0	1.1	3.03366	0	0	1.2	3.0124
	3.00386	0	0	4	3.00386	0	0	4.1	3.00386	0	0	4.2	3.02257	0	0	3	3.02257	0	0	3.1	3.02257	0	0	3.2	3.02024	0	0	2	3.02024	0	0	2.1	3.02024	0	0	2.2	3.03817	0	0	1	3.03817	0	0	1.1	3.03817	0	0	1.2	3.01902
	3.00536	0	0	4	3.00536	0	0	4.1	3.00536	0	0	4.2	3.02406	0	0	3	3.02406	0	0	3.1	3.02406	0	0	3.2	3.02173	0	0	2	3.02173	0	0	2.1	3.02173	0	0	2.2	3.03966	0	0	1	3.03966	0	0	1.1	3.03966	0	0	1.2	3.02051
	3.00661	0	0	4	3.00661	0	0	4.1	3.00661	0	0	4.2	3.02531	0	0	3	3.02531	0	0	3.1	3.02531	0	0	3.2	3.02322	0	0	2	3.02322	0	0	2.1	3.02322	0	0	2.2	3.04091	0	0	1	3.04091	0	0	1.1	3.04091	0	0	1.2	3.02176
	3.00782	0	0	4	3.00782	0	0	4.1	3.00782	0	0	4.2	3.02652	0	0	3	3.02652	0	0	3.1	3.02652	0	0	3.2	3.02442	0	0	2	3.02442	0	0	2.1	3.02442	0	0	2.2	3.04212	0	0	1	3.04212	0	0	1.1	3.04212	0	0	1.2	3.02297
	3.01444	0	0	4	3.01444	0	0	4.1	3.01444	0	0	4.2	3.03103	0	0	3	3.03103	0	0	3.1	3.03103	0	0	3.2	3.02893	0	0	2	3.02893	0	0	2.1	3.02893	0	0	2.2	3.04663	0	0	1	3.04663	0	0	1.1	3.04663	0	0	1.2	3.02748
	3.01593	0	0	4	3.01593	0	0	4.1	3.01593	0	0	4.2	3.03252	0	0	3	3.03252	0	0	3.1	3.03252	0	0	3.2	3.03042	0	0	2	3.03042	0	0	2.1	3.03042	0	0	2.2	3.04812	0	0	1	3.04812	0	0	1.1	3.04812	0	0	1.2	3.02896
	3.01741	0	0	4	3.01741	0	0	4.1	3.01741	0	0	4.2	3.03401	0	0	3	3.03401	0	0	3.1	3.03401	0	0	3.2	3.0319	0	0	2	3.0319	0	0	2.1	3.0319	0	0	2.2	3.0496	0	0	1	3.0496	0	0	1.1	3.0496	0	0	1.2	3.03045
	3.01862	0	0	4	3.01862	0	0	4.1	3.01862	0	0	4.2	3.03521	0	0	3	3.03521	0	0	3.1	3.03521	0	0	3.2	3.03311	0	0	2	3.03311	0	0	2.1	3.03311	0	0	2.2	3.05081	0	0	1	3.05081	0	0	1.1	3.05081	0	0	1.2	3.03165
	3.02312	0	0	4	3.02312	0	0	4.1	3.02312	0	0	4.2	3.03972	0	0	3	3.03972	0	0	3.1	3.03972	0	0	3.2	3.03762	0	0	2	3.03762	0	0	2.1	3.03762	0	0	2.2	3.05531	0	0	1	3.05531	0	0	1.1	3.05531	0	0	1.2	3.03616
	3.02461	0	0	4	3.02461	0	0	4.1	3.02461	0	0	4.2	3.04098	0	0	3	3.04098	0	0	3.1	3.04098	0	0	3.2	3.0391	0	0	2	3.0391	0	0	2.1	3.0391	0	0	2.2	3.0568	0	0	1	3.0568	0	0	1.1	3.0568	0	0	1.2	3.03765
	3.02609	0	0	4	3.02609	0	0	4.1	3.02609	0	0	4.2	3.04246	0	0	3	3.04246	0	0	3.1	3.04246	0	0	3.2	3.04059	0	0	2	3.04059	0	0	2.1	3.04059	0	0	2.2	3.05828	0	0	1	3.05828	0	0	1.1	3.05828	0	0	1.2	3.03914
	3.0273	0	0	4	3.0273	0	0	4.1	3.0273	0	0	4.2	3.04367	0	0	3	3.04367	0	0	3.1	3.04367	0	0	3.2	3.0418	0	0	2	3.0418	0	0	2.1	3.0418	0	0	2.2	3.05949	0	0	1	3.05949	0	0	1.1	3.05949	0	0	1.2	3.04034
	3.03181	0	0	4	3.03181	0	0	4.1	3.03181	0	0	4.2	3.04818	0	0	3	3.04818	0	0	3.1	3.04818	0	0	3.2	3.04631	0	0	2	3.04631	0	0	2.1	3.04631	0	0	2.2	3.064	0	0	1	3.064	0	0	1.1	3.064	0	0	1.2	3.04485
	3.0333	0	0	4	3.0333	0	0	4.1	3.0333	0	0	4.2	3.04967	0	0	3	3.04967	0	0	3.1	3.04967	0	0	3.2	3.04756	0	0	2	3.04756	0	0	2.1	3.04756	0	0	2.2	3.06548	0	0	1	3.06548	0	0	1.1	3.06548	0	0	1.2	3.04634
	3.03478	0	0	4	3.03478	0	0	4.1	3.03478	0	0	4.2	3.05115	0	0	3	3.05115	0	0	3.1	3.05115	0	0	3.2	3.04905	0	0	2	3.04905	0	0	2.1	3.04905	0	0	2.2	3.06697	0	0	1	3.06697	0	0	1.1	3.06697	0	0	1.2	3.04782
	3.03599	0	0	4	3.03599	0	0	4.1	3.03599	0	0	4.2	3.05236	0	0	3	3.05236	0	0	3.1	3.05236	0	0	3.2	3.05026	0	0	2	3.05026	0	0	2.1	3.05026	0	0	2.2	3.06817	0	0	1	3.06817	0	0	1.1	3.06817	0	0	1.2	3.04903
	3.0405	0	0	4	3.0405	0	0	4.1	3.0405	0	0	4.2	3.05687	0	0	3	3.05687	0	0	3.1	3.05687	0	0	3.2	3.05477	0	0	2	3.05477	0	0	2.1	3.05477	0	0	2.2	3.07268	0	0	1	3.07268	0	0	1.1	3.07268	0	0	1.2	3.05354
	3.04175	0	0	4	3.04175	0	0	4.1	3.04175	0	0	4.2	3.05835	0	0	3	3.05835	0	0	3.1	3.05835	0	0	3.2	3.05625	0	0	2	3.05625	0	0	2.1	3.05625	0	0	2.2	3.07417	0	0	1	3.07417	0	0	1.1	3.07417	0	0	1.2	3.05502
	3.04324	0	0	4	3.04324	0	0	4.1	3.04324	0	0	4.2	3.05984	0	0	3	3.05984	0	0	3.1	3.05984	0	0	3.2	3.05774	0	0	2	3.05774	0	0	2.1	3.05774	0	0	2.2	3.07566	0	0	1	3.07566	0	0	1.1	3.07566	0	0	1.2	3.05651
	3.04445	0	0	4	3.04445	0	0	4.1	3.04445	0	0	4.2	3.06105	0	0	3	3.06105	0	0	3.1	3.06105	0	0	3.2	3.05894	0	0	2	3.05894	0	0	2.1	3.05894	0	0	2.2	3.07686	0	0	1	3.07686	0	0	1.1	3.07686	0	0	1.2	3.05771
	3.04895	0	0	4	3.04895	0	0	4.1	3.04895	0	0	4.2	3.06555	0	0	3	3.06555	0	0	3.1	3.06555	0	0	3.2	3.06345	0	0	2	3.06345	0	0	2.1	3.06345	0	0	2.2	3.08137	0	0	1	3.08137	0	0	1.1	3.08137	0	0	1.2	3.06222
	3.05044	0	0	4	3.05044	0	0	4.1	3.05044	0	0	4.2	3.06704	0	0	3	3.06704	0	0	3.1	3.06704	0	0	3.2	3.06494	0	0	2	3.06494	0	0	2.1	3.06494	0	0	2.2	3.08263	0	0	1	3.08263	0	0	1.1	3.08263	0	0	1.2	3.06348
	3.05193	0	0	4	3.05193	0	0	4.1	3.05193	0	0	4.2	3.06852	0	0	3	3.06852	0	0	3.1	3.06852	0	0	3.2	3.06619	0	0	2	3.06619	0	0	2.1	3.06619	0	0	2.2	3.08411	0	0	1	3.08411	0	0	1.1	3.08411	0	0	1.2	3.06496
	3.05313	0	0	4	3.05313	0	0	4.1	3.05313	0	0	4.2	3.06973	0	0	3	3.06973	0	0	3.1	3.06973	0	0	3.2	3.0674	0	0	2	3.0674	0	0	2.1	3.0674	0	0	2.2	3.08532	0	0	1	3.08532	0	0	1.1	3.08532	16968.3	0.000141082	1.20014	3.06617
	3.05764	0	0	4	3.05764	0	0	4.1	3.05764	0	0	4.2	3.07424	0	0	3	3.07424	0	0	3.1	3.07424	0	0	3.2	3.07191	0	0	2	3.07191	0	0	2.1	3.07191	0	0	2.2	3.09006	0	0	1	3.09006	0	0	1.1	3.09006	0	0	1.2	3.07068
	3.0589	0	0	4	3.0589	0	0	4.1	3.0589	0	0	4.2	3.07572	0	0	3	3.07572	0	0	3.1	3.07572	0	0	3.2	3.07339	0	0	2	3.07339	0	0	2.1	3.07339	0	0	2.2	3.09154	0	0	1	3.09154	0	0	1.1	3.09154	0	0	1.2	3.07217
	3.06038	0	0	4	3.06038	0	0	4.1	3.06038	0	0	4.2	3.07721	0	0	3	3.07721	0	0	3.1	3.07721	0	0	3.2	3.07488	0	0	2	3.07488	0	0	2.1	3.07488	0	0	2.2	3.09303	0	0	1	3.09303	0	0	1.1	3.09303	0	0	1.2	3.07365
	3.06159	0	0	4	3.06159	0	0	4.1	3.06159	0	0	4.2	3.07841	0	0	3	3.07841	0	0	3.1	3.07841	0	0	3.2	3.07609	0	0	2	3.07609	0	0	2.1	3.07609	0	0	2.2	3.09514	0	0	1	3.09514	0	0	1.1	3.09514	0	0	1.2	3.07486
	3.06633	0	0	4	3.06633	0	0	4.1	3.06633	0	0	4.2	3.08292	0	0	3	3.08292	0	0	3.1	3.08292	0	0	3.2	3.0806	0	0	2	3.0806	0	0	2.1	3.0806	0	0	2.2	3.09988	0	0	1	3.09988	0	0	1.1	3.09988	0	0	1.2	3.07937
	3.06782	0	0	4	3.06782	0	0	4.1	3.06782	0	0	4.2	3.08418	0	0	3	3.08418	0	0	3.1	3.08418	0	0	3.2	3.08208	0	0	2	3.08208	0	0	2.1	3.08208	0	0	2.2	3.10137	0	0	1	3.10137	0	0	1.1	3.10137	0	0	1.2	3.08085
	3.06931	0	0	4	3.06931	0	0	4.1	3.06931	0	0	4.2	3.08567	0	0	3	3.08567	0	0	3.1	3.08567	0	0	3.2	3.08357	0	0	2	3.08357	0	0	2.1	3.08357	0	0	2.2	3.10286	0	0	1	3.10286	0	0	1.1	3.10286	0	0	1.2	3.08234
	3.07144	0	0	4	3.07144	0	0	4.1	3.07144	0	0	4.2	3.08687	0	0	3	3.08687	0	0	3.1	3.08687	0	0	3.2	3.08477	0	0	2	3.08477	0	0	2.1	3.08477	0	0	2.2	3.10498	0	0	1	3.10498	0	0	1.1	3.10498	0	0	1.2	3.08354
	3.07595	0	0	4	3.07595	0	0	4.1	3.07595	0	0	4.2	3.09161	0	0	3	3.09161	0	0	3.1	3.09161	0	0	3.2	3.08928	0	0	2	3.08928	0	0	2.1	3.08928	0	0	2.2	3.10949	0	0	1	3.10949	0	0	1.1	3.10949	0	0	1.2	3.08805
	3.07743	0	0	4	3.07743	0	0	4.1	3.07743	0	0	4.2	3.0931	0	0	3	3.0931	0	0	3.1	3.0931	0	0	3.2	3.09077	0	0	2	3.09077	0	0	2.1	3.09077	0	0	2.2	3.11097	0	0	1	3.11097	0	0	1.1	3.11097	0	0	1.2	3.08954
	3.07892	0	0	4	3.07892	0	0	4.1	3.07892	0	0	4.2	3.09458	0	0	3	3.09458	0	0	3.1	3.09458	0	0	3.2	3.09226	0	0	2	3.09226	0	0	2.1	3.09226	0	0	2.2	3.11246	0	0	1	3.11246	0	0	1.1	3.11246	0	0	1.2	3.09102
	3.08012	0	0	4	3.08012	0	0	4.1	3.08012	0	0	4.2	3.09668	0	0	3	3.09668	0	0	3.1	3.09668	0	0	3.2	3.09346	0	0	2	3.09346	0	0	2.1	3.09346	0	0	2.2	3.11366	0	0	1	3.11366	0	0	1.1	3.11366	0	0	1.2	3.09223
	3.08463	0	0	4	3.08463	0	0	4.1	3.08463	0	0	4.2	3.10119	0	0	3	3.10119	0	0	3.1	3.10119	0	0	3.2	3.10016	0	0	2	3.10016	0	0	2.1	3.10016	0	0	2.2	3.11842	0	0	1	3.11842	0	0	1.1	3.11842	0	0	1.2	3.09674
	3.08612	0	0	4	3.08612	0	0	4.1	3.08612	0	0	4.2	3.1027	0	0	3	3.1027	0	0	3.1	3.1027	0	0	3.2	3.10165	0	0	2	3.10165	0	0	2.1	3.10165	0	0	2.2	3.1199	0	0	1	3.1199	0	0	1.1	3.1199	0	0	1.2	3.09822
	3.0876	0	0	4	3.0876	0	0	4.1	3.0876	0	0	4.2	3.10418	0	0	3	3.10418	0	0	3.1	3.10418	0	0	3.2	3.10313	0	0	2	3.10313	0	0	2.1	3.10313	0	0	2.2	3.12139	0	0	1	3.12139	0	0	1.1	3.12139	0	0	1.2	3.09971
	3.08881	0	0	4	3.08881	0	0	4.1	3.08881	0	0	4.2	3.10539	0	0	3	3.10539	0	0	3.1	3.10539	0	0	3.2	3.10434	0	0	2	3.10434	0	0	2.1	3.10434	0	0	2.2	3.12352	0	0	1	3.12352	0	0	1.1	3.12352	0	0	1.2	3.10179
	3.09544	0	0	4	3.09544	0	0	4.1	3.09544	0	0	4.2	3.11013	0	0	3	3.11013	0	0	3.1	3.11013	0	0	3.2	3.10885	0	0	2	3.10885	0	0	2.1	3.10885	0	0	2.2	3.12803	0	0	1	3.12803	0	0	1.1	3.12803	0	0	1.2	3.1063
	3.09692	0	0	4	3.09692	0	0	4.1	3.09692	0	0	4.2	3.11161	0	0	3	3.11161	0	0	3.1	3.11161	0	0	3.2	3.1101	0	0	2	3.1101	0	0	2.1	3.1101	0	0	2.2	3.12951	0	0	1	3.12951	0	0	1.1	3.12951	0	0	1.2	3.10779
	3.09841	0	0	4	3.09841	0	0	4.1	3.09841	0	0	4.2	3.1131	0	0	3	3.1131	0	0	3.1	3.1131	0	0	3.2	3.11159	0	0	2	3.11159	0	0	2.1	3.11159	0	0	2.2	3.131	0	0	1	3.131	0	0	1.1	3.131	0	0	1.2	3.10927
	3.09961	0	0	4	3.09961	0	0	4.1	3.09961	0	0	4.2	3.11521	0	0	3	3.11521	0	0	3.1	3.11521	0	0	3.2	3.1128	0	0	2	3.1128	0	0	2.1	3.1128	0	0	2.2	3.13221	0	0	1	3.13221	0	0	1.1	3.13221	0	0	1.2	3.11048
	3.10413	0	0	4	3.10413	0	0	4.1	3.10413	0	0	4.2	3.11995	0	0	3	3.11995	0	0	3.1	3.11995	0	0	3.2	3.1173	0	0	2	3.1173	0	0	2.1	3.1173	0	0	2.2	3.13672	0	0	1	3.13672	0	0	1.1	3.13672	0	0	1.2	3.11499
	3.10538	0	0	4	3.10538	0	0	4.1	3.10538	0	0	4.2	3.12143	0	0	3	3.12143	0	0	3.1	3.12143	0	0	3.2	3.11879	0	0	2	3.11879	0	0	2.1	3.11879	0	0	2.2	3.1382	0	0	1	3.1382	0	0	1.1	3.1382	0	0	1.2	3.11647
	3.10687	0	0	4	3.10687	0	0	4.1	3.10687	0	0	4.2	3.12292	0	0	3	3.12292	0	0	3.1	3.12292	0	0	3.2	3.12028	0	0	2	3.12028	0	0	2.1	3.12028	0	0	2.2	3.13969	0	0	1	3.13969	0	0	1.1	3.13969	0	0	1.2	3.11796
	3.10807	0	0	4	3.10807	0	0	4.1	3.10807	18247.4	0.000151717	4.20015	3.12503	0	0	3	3.12503	0	0	3.1	3.12503	0	0	3.2	3.12148	0	0	2	3.12148	0	0	2.1	3.12148	0	0	2.2	3.14089	0	0	1	3.14089	0	0	1.1	3.14089	0	0	1.2	3.11916
	3.11258	0	0	4	3.11258	0	0	4.1	3.11258	0	0	4.2	3.12954	0	0	3	3.12954	0	0	3.1	3.12954	0	0	3.2	3.12622	0	0	2	3.12622	0	0	2.1	3.12622	0	0	2.2	3.1454	0	0	1	3.1454	0	0	1.1	3.1454	0	0	1.2	3.12367
	3.11407	0	0	4	3.11407	0	0	4.1	3.11407	0	0	4.2	3.13103	0	0	3	3.13103	0	0	3.1	3.13103	0	0	3.2	3.12771	0	0	2	3.12771	0	0	2.1	3.12771	0	0	2.2	3.14689	0	0	1	3.14689	0	0	1.1	3.14689	0	0	1.2	3.12516
	3.11555	0	0	4	3.11555	0	0	4.1	3.11555	0	0	4.2	3.13251	0	0	3	3.13251	0	0	3.1	3.13251	0	0	3.2	3.12919	0	0	2	3.12919	0	0	2.1	3.12919	0	0	2.2	3.14838	0	0	1	3.14838	0	0	1.1	3.14838	0	0	1.2	3.12664
	3.11676	0	0	4	3.11676	0	0	4.1	3.11676	0	0	4.2	3.13372	0	0	3	3.13372	0	0	3.1	3.13372	0	0	3.2	3.1313	0	0	2	3.1313	0	0	2.1	3.1313	0	0	2.2	3.14958	0	0	1	3.14958	0	0	1.1	3.14958	0	0	1.2	3.12785
	3.12126	0	0	4	3.12126	0	0	4.1	3.12126	0	0	4.2	3.13823	0	0	3	3.13823	0	0	3.1	3.13823	0	0	3.2	3.13604	0	0	2	3.13604	0	0	2.1	3.13604	0	0	2.2	3.15432	0	0	1	3.15432	0	0	1.1	3.15432	0	0	1.2	3.13236
	3.12275	0	0	4	3.12275	0	0	4.1	3.12275	0	0	4.2	3.13971	0	0	3	3.13971	0	0	3.1	3.13971	0	0	3.2	3.13753	0	0	2	3.13753	0	0	2.1	3.13753	0	0	2.2	3.1558	0	0	1	3.1558	0	0	1.1	3.1558	0	0	1.2	3.13384
	3.12423	0	0	4	3.12423	0	0	4.1	3.12423	0	0	4.2	3.1412	0	0	3	3.1412	0	0	3.1	3.1412	0	0	3.2	3.13901	0	0	2	3.13901	0	0	2.1	3.13901	0	0	2.2	3.15729	0	0	1	3.15729	0	0	1.1	3.15729	0	0	1.2	3.13533
	3.12544	0	0	4	3.12544	0	0	4.1	3.12544	0	0	4.2	3.1424	0	0	3	3.1424	0	0	3.1	3.1424	0	0	3.2	3.14113	0	0	2	3.14113	0	0	2.1	3.14113	0	0	2.2	3.15943	0	0	1	3.15943	0	0	1.1	3.15943	0	0	1.2	3.13653
	3.13018	0	0	4	3.13018	0	0	4.1	3.13018	0	0	4.2	3.14691	0	0	3	3.14691	0	0	3.1	3.14691	0	0	3.2	3.14587	0	0	2	3.14587	0	0	2.1	3.14587	0	0	2.2	3.16394	0	0	1	3.16394	0	0	1.1	3.16394	0	0	1.2	3.14127
	3.13167	0	0	4	3.13167	0	0	4.1	3.13167	0	0	4.2	3.1484	0	0	3	3.1484	0	0	3.1	3.1484	0	0	3.2	3.14735	0	0	2	3.14735	0	0	2.1	3.14735	0	0	2.2	3.16543	0	0	1	3.16543	0	0	1.1	3.16543	0	0	1.2	3.14276
	3.13315	0	0	4	3.13315	0	0	4.1	3.13315	0	0	4.2	3.14988	0	0	3	3.14988	0	0	3.1	3.14988	0	0	3.2	3.14884	0	0	2	3.14884	0	0	2.1	3.14884	0	0	2.2	3.16692	0	0	1	3.16692	0	0	1.1	3.16692	0	0	1.2	3.14424
	3.13529	0	0	4	3.13529	0	0	4.1	3.13529	0	0	4.2	3.15109	0	0	3	3.15109	0	0	3.1	3.15109	0	0	3.2	3.15095	0	0	2	3.15095	0	0	2.1	3.15095	0	0	2.2	3.16812	0	0	1	3.16812	0	0	1.1	3.16812	0	0	1.2	3.14634
	3.14003	0	0	4	3.14003	0	0	4.1	3.14003	0	0	4.2	3.1556	0	0	3	3.1556	0	0	3.1	3.1556	0	0	3.2	3.15546	0	0	2	3.15546	0	0	2.1	3.15546	0	0	2.2	3.17263	0	0	1	3.17263	0	0	1.1	3.17263	0	0	1.2	3.15084
	3.14152	0	0	4	3.14152	0	0	4.1	3.14152	0	0	4.2	3.15708	0	0	3	3.15708	0	0	3.1	3.15708	0	0	3.2	3.15695	0	0	2	3.15695	0	0	2.1	3.15695	0	0	2.2	3.17412	0	0	1	3.17412	0	0	1.1	3.17412	0	0	1.2	3.15233
	3.143	0	0	4	3.143	0	0	4.1	3.143	0	0	4.2	3.15857	0	0	3	3.15857	0	0	3.1	3.15857	0	0	3.2	3.15843	0	0	2	3.15843	0	0	2.1	3.15843	0	0	2.2	3.1756	0	0	1	3.1756	0	0	1.1	3.1756	0	0	1.2	3.15382
	3.14513	0	0	4	3.14513	0	0	4.1	3.14513	0	0	4.2	3.15977	0	0	3	3.15977	0	0	3.1	3.15977	0	0	3.2	3.15964	0	0	2	3.15964	0	0	2.1	3.15964	0	0	2.2	3.17681	0	0	1	3.17681	0	0	1.1	3.17681	0	0	1.2	3.15502
	3.14965	0	0	4	3.14965	0	0	4.1	3.14965	0	0	4.2	3.16428	0	0	3	3.16428	0	0	3.1	3.16428	0	0	3.2	3.16415	0	0	2	3.16415	0	0	2.1	3.16415	0	0	2.2	3.18144	0	0	1	3.18144	0	0	1.1	3.18144	0	0	1.2	3.15953
	3.15113	0	0	4	3.15113	0	0	4.1	3.15113	0	0	4.2	3.16577	0	0	3	3.16577	0	0	3.1	3.16577	0	0	3.2	3.16563	0	0	2	3.16563	0	0	2.1	3.16563	0	0	2.2	3.18292	0	0	1	3.18292	0	0	1.1	3.18292	0	0	1.2	3.16102
	3.15261	0	0	4	3.15261	0	0	4.1	3.15261	0	0	4.2	3.16725	0	0	3	3.16725	0	0	3.1	3.16725	0	0	3.2	3.16712	0	0	2	3.16712	0	0	2.1	3.16712	0	0	2.2	3.18418	0	0	1	3.18418	0	0	1.1	3.18418	0	0	1.2	3.1625
	3.15382	0	0	4	3.15382	0	0	4.1	3.15382	0	0	4.2	3.16846	0	0	3	3.16846	0	0	3.1	3.16846	0	0	3.2	3.16833	0	0	2	3.16833	0	0	2.1	3.16833	0	0	2.2	3.18538	0	0	1	3.18538	0	0	1.1	3.18538	0	0	1.2	3.16371
	3.15833	0	0	4	3.15833	0	0	4.1	3.15833	0	0	4.2	3.17297	0	0	3	3.17297	0	0	3.1	3.17297	0	0	3.2	3.17284	0	0	2	3.17284	0	0	2.1	3.17284	0	0	2.2	3.18989	0	0	1	3.18989	0	0	1.1	3.18989	0	0	1.2	3.16844
	3.15982	0	0	4	3.15982	0	0	4.1	3.15982	0	0	4.2	3.17446	0	0	3	3.17446	0	0	3.1	3.17446	0	0	3.2	3.17432	0	0	2	3.17432	0	0	2.1	3.17432	0	0	2.2	3.19138	0	0	1	3.19138	0	0	1.1	3.19138	0	0	1.2	3.16993
	3.1613	0	0	4	3.1613	0	0	4.1	3.1613	0	0	4.2	3.17594	0	0	3	3.17594	0	0	3.1	3.17594	0	0	3.2	3.17581	0	0	2	3.17581	0	0	2.1	3.17581	0	0	2.2	3.19287	0	0	1	3.19287	0	0	1.1	3.19287	0	0	1.2	3.17142
	3.16251	10550.2	0.00453662	4.00454	3.16251	0	0	4.1	3.16251	0	0	4.2	3.17714	0	0	3	3.17714	0	0	3.1	3.17714	0	0	3.2	3.17701	0	0	2	3.17701	0	0	2.1	3.17701	0	0	2.2	3.19407	0	0	1	3.19407	0	0	1.1	3.19407	0	0	1.2	3.17353
	3.16702	0	0	4	3.16702	0	0	4.1	3.16702	0	0	4.2	3.18384	0	0	3	3.18384	0	0	3.1	3.18384	0	0	3.2	3.18152	0	0	2	3.18152	0	0	2.1	3.18152	0	0	2.2	3.19858	0	0	1	3.19858	0	0	1.1	3.19858	0	0	1.2	3.18016
	3.16851	0	0	4	3.16851	0	0	4.1	3.16851	0	0	4.2	3.18533	0	0	3	3.18533	0	0	3.1	3.18533	0	0	3.2	3.18301	0	0	2	3.18301	0	0	2.1	3.18301	0	0	2.2	3.20007	0	0	1	3.20007	0	0	1.1	3.20007	0	0	1.2	3.18165
	3.16971	0	0	4	3.16971	0	0	4.1	3.16971	0	0	4.2	3.18659	0	0	3	3.18659	0	0	3.1	3.18659	0	0	3.2	3.18449	0	0	2	3.18449	0	0	2.1	3.18449	0	0	2.2	3.20132	0	0	1	3.20132	0	0	1.1	3.20132	0	0	1.2	3.18313
	3.17422	0	0	4	3.17422	0	0	4.1	3.17422	0	0	4.2	3.1878	0	0	3	3.1878	0	0	3.1	3.1878	0	0	3.2	3.1857	0	0	2	3.1857	0	0	2.1	3.1857	0	0	2.2	3.20253	0	0	1	3.20253	0	0	1.1	3.20253	0	0	1.2	3.18434
	3.17571	0	0	4	3.17571	0	0	4.1	3.17571	0	0	4.2	3.19231	0	0	3	3.19231	0	0	3.1	3.19231	0	0	3.2	3.19021	0	0	2	3.19021	0	0	2.1	3.19021	0	0	2.2	3.20727	0	0	1	3.20727	0	0	1.1	3.20727	0	0	1.2	3.18885
	3.17719	0	0	4	3.17719	0	0	4.1	3.17719	0	0	4.2	3.19379	0	0	3	3.19379	0	0	3.1	3.19379	0	0	3.2	3.1917	0	0	2	3.1917	0	0	2.1	3.1917	0	0	2.2	3.20875	0	0	1	3.20875	0	0	1.1	3.20875	0	0	1.2	3.19033
	3.1784	0	0	4	3.1784	0	0	4.1	3.1784	0	0	4.2	3.19528	0	0	3	3.19528	0	0	3.1	3.19528	0	0	3.2	3.19318	0	0	2	3.19318	0	0	2.1	3.19318	0	0	2.2	3.21024	0	0	1	3.21024	0	0	1.1	3.21024	0	0	1.2	3.19182
	3.18291	0	0	4	3.18291	0	0	4.1	3.18291	0	0	4.2	3.19648	0	0	3	3.19648	0	0	3.1	3.19648	0	0	3.2	3.19439	0	0	2	3.19439	0	0	2.1	3.19439	0	0	2.2	3.21238	0	0	1	3.21238	0	0	1.1	3.21238	0	0	1.2	3.19302
	3.18439	0	0	4	3.18439	0	0	4.1	3.18439	0	0	4.2	3.20099	0	0	3	3.20099	0	0	3.1	3.20099	0	0	3.2	3.1989	0	0	2	3.1989	0	0	2.1	3.1989	0	0	2.2	3.21689	0	0	1	3.21689	0	0	1.1	3.21689	0	0	1.2	3.19753
	3.18588	0	0	4	3.18588	0	0	4.1	3.18588	0	0	4.2	3.20248	0	0	3	3.20248	0	0	3.1	3.20248	0	0	3.2	3.20038	0	0	2	3.20038	0	0	2.1	3.20038	0	0	2.2	3.21837	0	0	1	3.21837	0	0	1.1	3.21837	0	0	1.2	3.19902
	3.18708	0	0	4	3.18708	0	0	4.1	3.18708	0	0	4.2	3.20396	0	0	3	3.20396	0	0	3.1	3.20396	0	0	3.2	3.20187	0	0	2	3.20187	0	0	2.1	3.20187	0	0	2.2	3.21986	0	0	1	3.21986	0	0	1.1	3.21986	0	0	1.2	3.20051
	3.19159	0	0	4	3.19159	0	0	4.1	3.19159	0	0	4.2	3.20517	0	0	3	3.20517	0	0	3.1	3.20517	0	0	3.2	3.20307	0	0	2	3.20307	0	0	2.1	3.20307	0	0	2.2	3.22107	0	0	1	3.22107	0	0	1.1	3.22107	0	0	1.2	3.20171
	3.19308	0	0	4	3.19308	0	0	4.1	3.19308	0	0	4.2	3.20992	0	0	3	3.20992	0	0	3.1	3.20992	0	0	3.2	3.20758	0	0	2	3.20758	0	0	2.1	3.20758	0	0	2.2	3.22558	0	0	1	3.22558	0	0	1.1	3.22558	0	0	1.2	3.20645
	3.19456	0	0	4	3.19456	0	0	4.1	3.19456	0	0	4.2	3.21141	0	0	3	3.21141	0	0	3.1	3.21141	0	0	3.2	3.20887	0	0	2	3.20887	0	0	2.1	3.20887	0	0	2.2	3.22706	0	0	1	3.22706	0	0	1.1	3.22706	0	0	1.2	3.20793
	3.19577	0	0	4	3.19577	0	0	4.1	3.19577	0	0	4.2	3.21289	0	0	3	3.21289	0	0	3.1	3.21289	0	0	3.2	3.21035	0	0	2	3.21035	0	0	2.1	3.21035	0	0	2.2	3.22857	0	0	1	3.22857	0	0	1.1	3.22857	0	0	1.2	3.20942
	3.20028	0	0	4	3.20028	0	0	4.1	3.20028	0	0	4.2	3.21502	0	0	3	3.21502	0	0	3.1	3.21502	0	0	3.2	3.21156	0	0	2	3.21156	0	0	2.1	3.21156	0	0	2.2	3.22977	0	0	1	3.22977	0	0	1.1	3.22977	0	0	1.2	3.21153
	3.20153	0	0	4	3.20153	0	0	4.1	3.20153	0	0	4.2	3.21952	0	0	3	3.21952	0	0	3.1	3.21952	0	0	3.2	3.21607	0	0	2	3.21607	0	0	2.1	3.21607	0	0	2.2	3.23428	0	0	1	3.23428	0	0	1.1	3.23428	0	0	1.2	3.21604
	3.20302	0	0	4	3.20302	0	0	4.1	3.20302	0	0	4.2	3.22078	0	0	3	3.22078	0	0	3.1	3.22078	0	0	3.2	3.21755	0	0	2	3.21755	0	0	2.1	3.21755	0	0	2.2	3.23577	0	0	1	3.23577	0	0	1.1	3.23577	0	0	1.2	3.21752
	3.20422	0	0	4	3.20422	0	0	4.1	3.20422	0	0	4.2	3.22227	0	0	3	3.22227	0	0	3.1	3.22227	0	0	3.2	3.21904	0	0	2	3.21904	0	0	2.1	3.21904	0	0	2.2	3.23725	0	0	1	3.23725	0	0	1.1	3.23725	0	0	1.2	3.21901
	3.20873	0	0	4	3.20873	0	0	4.1	3.20873	0	0	4.2	3.22348	0	0	3	3.22348	0	0	3.1	3.22348	0	0	3.2	3.22024	0	0	2	3.22024	0	0	2.1	3.22024	0	0	2.2	3.23846	0	0	1	3.23846	0	0	1.1	3.23846	0	0	1.2	3.22021
	3.21022	0	0	4	3.21022	0	0	4.1	3.21022	0	0	4.2	3.22798	0	0	3	3.22798	0	0	3.1	3.22798	0	0	3.2	3.22475	0	0	2	3.22475	0	0	2.1	3.22475	0	0	2.2	3.24297	0	0	1	3.24297	0	0	1.1	3.24297	0	0	1.2	3.22472
	3.21147	0	0	4	3.21147	0	0	4.1	3.21147	0	0	4.2	3.22947	0	0	3	3.22947	0	0	3.1	3.22947	0	0	3.2	3.22624	0	0	2	3.22624	0	0	2.1	3.22624	0	0	2.2	3.24445	0	0	1	3.24445	0	0	1.1	3.24445	0	0	1.2	3.22598
	3.21268	0	0	4	3.21268	0	0	4.1	3.21268	0	0	4.2	3.23095	0	0	3	3.23095	0	0	3.1	3.23095	0	0	3.2	3.22749	0	0	2	3.22749	0	0	2.1	3.22749	0	0	2.2	3.24594	0	0	1	3.24594	0	0	1.1	3.24594	0	0	1.2	3.22746
	3.21719	0	0	4	3.21719	0	0	4.1	3.21719	0	0	4.2	3.23216	0	0	3	3.23216	0	0	3.1	3.23216	0	0	3.2	3.2287	0	0	2	3.2287	0	0	2.1	3.2287	0	0	2.2	3.24714	0	0	1	3.24714	0	0	1.1	3.24714	0	0	1.2	3.22867
	3.21869	0	0	4	3.21869	0	0	4.1	3.21869	0	0	4.2	3.23667	0	0	3	3.23667	0	0	3.1	3.23667	0	0	3.2	3.23321	0	0	2	3.23321	0	0	2.1	3.23321	0	0	2.2	3.25165	0	0	1	3.25165	0	0	1.1	3.25165	0	0	1.2	3.23318
	3.22018	0	0	4	3.22018	0	0	4.1	3.22018	0	0	4.2	3.23815	0	0	3	3.23815	0	0	3.1	3.23815	0	0	3.2	3.2347	0	0	2	3.2347	0	0	2.1	3.2347	0	0	2.2	3.25314	0	0	1	3.25314	0	0	1.1	3.25314	0	0	1.2	3.23466
	3.22139	0	0	4	3.22139	0	0	4.1	3.22139	0	0	4.2	3.23964	0	0	3	3.23964	0	0	3.1	3.23964	0	0	3.2	3.23618	0	0	2	3.23618	0	0	2.1	3.23618	0	0	2.2	3.25434	0	0	1	3.25434	0	0	1.1	3.25434	0	0	1.2	3.23615
	3.22589	0	0	4	3.22589	0	0	4.1	3.22589	0	0	4.2	3.24085	0	0	3	3.24085	0	0	3.1	3.24085	0	0	3.2	3.23738	0	0	2	3.23738	0	0	2.1	3.23738	0	0	2.2	3.25885	0	0	1	3.25885	0	0	1.1	3.25885	0	0	1.2	3.23735
	3.22738	0	0	4	3.22738	0	0	4.1	3.22738	0	0	4.2	3.24535	0	0	3	3.24535	0	0	3.1	3.24535	0	0	3.2	3.24212	0	0	2	3.24212	0	0	2.1	3.24212	0	0	2.2	3.26034	0	0	1	3.26034	0	0	1.1	3.26034	0	0	1.2	3.24186
	3.22876	0	0	4	3.22876	0	0	4.1	3.22876	0	0	4.2	3.24684	0	0	3	3.24684	0	0	3.1	3.24684	0	0	3.2	3.24361	0	0	2	3.24361	0	0	2.1	3.24361	0	0	2.2	3.26182	0	0	1	3.26182	0	0	1.1	3.26182	0	0	1.2	3.24335
	3.22996	0	0	4	3.22996	0	0	4.1	3.22996	0	0	4.2	3.24833	0	0	3	3.24833	0	0	3.1	3.24833	0	0	3.2	3.2451	0	0	2	3.2451	0	0	2.1	3.2451	0	0	2.2	3.26303	0	0	1	3.26303	0	0	1.1	3.26303	0	0	1.2	3.24483
	3.23447	0	0	4	3.23447	0	0	4.1	3.23447	0	0	4.2	3.24953	0	0	3	3.24953	0	0	3.1	3.24953	0	0	3.2	3.24725	0	0	2	3.24725	0	0	2.1	3.24725	0	0	2.2	3.26754	0	0	1	3.26754	0	0	1.1	3.26754	0	0	1.2	3.24604
	3.23595	0	0	4	3.23595	0	0	4.1	3.23595	0	0	4.2	3.25404	0	0	3	3.25404	0	0	3.1	3.25404	0	0	3.2	3.25176	0	0	2	3.25176	0	0	2.1	3.25176	0	0	2.2	3.26903	0	0	1	3.26903	0	0	1.1	3.26903	0	0	1.2	3.25078
	3.23716	0	0	4	3.23716	0	0	4.1	3.23716	0	0	4.2	3.25553	0	0	3	3.25553	0	0	3.1	3.25553	0	0	3.2	3.25324	0	0	2	3.25324	0	0	2.1	3.25324	0	0	2.2	3.27052	0	0	1	3.27052	0	0	1.1	3.27052	0	0	1.2	3.25226
	3.24167	0	0	4	3.24167	0	0	4.1	3.24167	0	0	4.2	3.25702	0	0	3	3.25702	0	0	3.1	3.25702	0	0	3.2	3.25473	0	0	2	3.25473	0	0	2.1	3.25473	0	0	2.2	3.27172	0	0	1	3.27172	0	0	1.1	3.27172	0	0	1.2	3.25375
	3.24316	0	0	4	3.24316	0	0	4.1	3.24316	0	0	4.2	3.25822	0	0	3	3.25822	0	0	3.1	3.25822	0	0	3.2	3.25593	0	0	2	3.25593	0	0	2.1	3.25593	0	0	2.2	3.27646	0	0	1	3.27646	0	0	1.1	3.27646	0	0	1.2	3.25586
	3.24464	0	0	4	3.24464	0	0	4.1	3.24464	0	0	4.2	3.26296	0	0	3	3.26296	0	0	3.1	3.26296	0	0	3.2	3.26256	0	0	2	3.26256	0	0	2.1	3.26256	0	0	2.2	3.27794	0	0	1	3.27794	0	0	1.1	3.27794	0	0	1.2	3.26037
	3.24585	0	0	4	3.24585	0	0	4.1	3.24585	0	0	4.2	3.26445	0	0	3	3.26445	0	0	3.1	3.26445	0	0	3.2	3.26405	0	0	2	3.26405	0	0	2.1	3.26405	0	0	2.2	3.27915	0	0	1	3.27915	0	0	1.1	3.27915	0	0	1.2	3.26185
	3.25036	0	0	4	3.25036	0	0	4.1	3.25036	0	0	4.2	3.2657	0	0	3	3.2657	0	0	3.1	3.2657	0	0	3.2	3.26553	0	0	2	3.26553	0	0	2.1	3.26553	0	0	2.2	3.28366	0	0	1	3.28366	0	0	1.1	3.28366	0	0	1.2	3.26334
	3.25184	0	0	4	3.25184	0	0	4.1	3.25184	0	0	4.2	3.26784	0	0	3	3.26784	0	0	3.1	3.26784	0	0	3.2	3.26674	0	0	2	3.26674	0	0	2.1	3.26674	19079.3	0.000158634	2.20016	3.28514	0	0	1	3.28514	0	0	1.1	3.28514	0	0	1.2	3.26455
	3.25334	0	0	4	3.25334	0	0	4.1	3.25334	0	0	4.2	3.27235	0	0	3	3.27235	0	0	3.1	3.27235	0	0	3.2	3.27125	0	0	2	3.27125	0	0	2.1	3.27125	0	0	2.2	3.28635	0	0	1	3.28635	0	0	1.1	3.28635	0	0	1.2	3.26905
	3.25455	0	0	4	3.25455	0	0	4.1	3.25455	0	0	4.2	3.27383	0	0	3	3.27383	0	0	3.1	3.27383	0	0	3.2	3.27274	0	0	2	3.27274	0	0	2.1	3.27274	0	0	2.2	3.29086	0	0	1	3.29086	0	0	1.1	3.29086	0	0	1.2	3.27054
	3.26118	0	0	4	3.26118	0	0	4.1	3.26118	0	0	4.2	3.27532	0	0	3	3.27532	0	0	3.1	3.27532	0	0	3.2	3.27399	0	0	2	3.27399	0	0	2.1	3.27399	0	0	2.2	3.29234	0	0	1	3.29234	0	0	1.1	3.29234	0	0	1.2	3.2718
	3.26269	0	0	4	3.26269	0	0	4.1	3.26269	0	0	4.2	3.27652	0	0	3	3.27652	0	0	3.1	3.27652	0	0	3.2	3.2752	0	0	2	3.2752	0	0	2.1	3.2752	0	0	2.2	3.29383	0	0	1	3.29383	0	0	1.1	3.29383	0	0	1.2	3.273
	3.26417	0	0	4	3.26417	0	0	4.1	3.26417	0	0	4.2	3.28126	0	0	3	3.28126	0	0	3.1	3.28126	0	0	3.2	3.27971	0	0	2	3.27971	0	0	2.1	3.27971	0	0	2.2	3.29503	0	0	1	3.29503	0	0	1.1	3.29503	0	0	1.2	3.27751
	3.26538	0	0	4	3.26538	0	0	4.1	3.26538	0	0	4.2	3.28275	0	0	3	3.28275	0	0	3.1	3.28275	0	0	3.2	3.28119	0	0	2	3.28119	0	0	2.1	3.28119	0	0	2.2	3.29954	0	0	1	3.29954	0	0	1.1	3.29954	0	0	1.2	3.279
	3.26989	0	0	4	3.26989	0	0	4.1	3.26989	0	0	4.2	3.28423	0	0	3	3.28423	0	0	3.1	3.28423	0	0	3.2	3.28268	0	0	2	3.28268	0	0	2.1	3.28268	0	0	2.2	3.30103	0	0	1	3.30103	0	0	1.1	3.30103	0	0	1.2	3.28048
	3.27137	0	0	4	3.27137	0	0	4.1	3.27137	0	0	4.2	3.28636	0	0	3	3.28636	0	0	3.1	3.28636	30946.7	0.000257306	3.20026	3.28388	0	0	2	3.28388	0	0	2.1	3.28388	0	0	2.2	3.30252	0	0	1	3.30252	0	0	1.1	3.30252	0	0	1.2	3.28169
	3.27286	0	0	4	3.27286	0	0	4.1	3.27286	0	0	4.2	3.29087	0	0	3	3.29087	0	0	3.1	3.29087	0	0	3.2	3.28862	0	0	2	3.28862	0	0	2.1	3.28862	0	0	2.2	3.30372	0	0	1	3.30372	0	0	1.1	3.30372	0	0	1.2	3.2862
	3.27406	0	0	4	3.27406	0	0	4.1	3.27406	0	0	4.2	3.29236	0	0	3	3.29236	0	0	3.1	3.29236	0	0	3.2	3.28988	0	0	2	3.28988	0	0	2.1	3.28988	0	0	2.2	3.30823	0	0	1	3.30823	0	0	1.1	3.30823	0	0	1.2	3.28768
	3.27857	0	0	4	3.27857	0	0	4.1	3.27857	0	0	4.2	3.29356	0	0	3	3.29356	0	0	3.1	3.29356	0	0	3.2	3.29136	0	0	2	3.29136	0	0	2.1	3.29136	0	0	2.2	3.30972	0	0	1	3.30972	0	0	1.1	3.30972	0	0	1.2	3.28917
	3.28006	0	0	4	3.28006	0	0	4.1	3.28006	0	0	4.2	3.29807	0	0	3	3.29807	0	0	3.1	3.29807	0	0	3.2	3.29352	0	0	2	3.29352	0	0	2.1	3.29352	0	0	2.2	3.31122	0	0	1	3.31122	0	0	1.1	3.31122	0	0	1.2	3.29129
	3.28154	0	0	4	3.28154	0	0	4.1	3.28154	0	0	4.2	3.29956	0	0	3	3.29956	0	0	3.1	3.29956	0	0	3.2	3.29826	0	0	2	3.29826	0	0	2.1	3.29826	0	0	2.2	3.31243	0	0	1	3.31243	0	0	1.1	3.31243	0	0	1.2	3.29602
	3.28275	0	0	4	3.28275	0	0	4.1	3.28275	0	0	4.2	3.30104	0	0	3	3.30104	0	0	3.1	3.30104	0	0	3.2	3.29974	0	0	2	3.29974	0	0	2.1	3.29974	0	0	2.2	3.31694	0	0	1	3.31694	0	0	1.1	3.31694	0	0	1.2	3.29751
	3.28749	0	0	4	3.28749	0	0	4.1	3.28749	0	0	4.2	3.30225	0	0	3	3.30225	0	0	3.1	3.30225	0	0	3.2	3.30095	0	0	2	3.30095	0	0	2.1	3.30095	0	0	2.2	3.31843	0	0	1	3.31843	0	0	1.1	3.31843	0	0	1.2	3.29877
	3.2899	0	0	4	3.2899	0	0	4.1	3.2899	0	0	4.2	3.30676	0	0	3	3.30676	0	0	3.1	3.30676	0	0	3.2	3.30546	0	0	2	3.30546	0	0	2.1	3.30546	0	0	2.2	3.31991	0	0	1	3.31991	0	0	1.1	3.31991	0	0	1.2	3.30088
	3.2912	0	0	4	3.2912	0	0	4.1	3.2912	0	0	4.2	3.30824	0	0	3	3.30824	0	0	3.1	3.30824	0	0	3.2	3.30695	0	0	2	3.30695	0	0	2.1	3.30695	0	0	2.2	3.32112	0	0	1	3.32112	0	0	1.1	3.32112	0	0	1.2	3.30539
	3.29334	0	0	4	3.29334	0	0	4.1	3.29334	0	0	4.2	3.30973	0	0	3	3.30973	0	0	3.1	3.30973	0	0	3.2	3.30843	0	0	2	3.30843	0	0	2.1	3.30843	0	0	2.2	3.32562	0	0	1	3.32562	0	0	1.1	3.32562	0	0	1.2	3.30688
	3.29808	0	0	4	3.29808	0	0	4.1	3.29808	0	0	4.2	3.31093	0	0	3	3.31093	0	0	3.1	3.31093	0	0	3.2	3.31058	0	0	2	3.31058	0	0	2.1	3.31058	0	0	2.2	3.32711	0	0	1	3.32711	0	0	1.1	3.32711	0	0	1.2	3.30837
	3.29956	0	0	4	3.29956	0	0	4.1	3.29956	0	0	4.2	3.31567	0	0	3	3.31567	0	0	3.1	3.31567	0	0	3.2	3.31509	0	0	2	3.31509	0	0	2.1	3.31509	0	0	2.2	3.3286	0	0	1	3.3286	0	0	1.1	3.3286	0	0	1.2	3.30957
	3.30105	0	0	4	3.30105	0	0	4.1	3.30105	0	0	4.2	3.31716	0	0	3	3.31716	0	0	3.1	3.31716	0	0	3.2	3.31657	0	0	2	3.31657	0	0	2.1	3.31657	0	0	2.2	3.32981	0	0	1	3.32981	0	0	1.1	3.32981	0	0	1.2	3.31408
	3.3032	0	0	4	3.3032	0	0	4.1	3.3032	0	0	4.2	3.31864	0	0	3	3.31864	0	0	3.1	3.31864	0	0	3.2	3.31806	0	0	2	3.31806	0	0	2.1	3.31806	0	0	2.2	3.33431	0	0	1	3.33431	0	0	1.1	3.33431	0	0	1.2	3.31557
	3.30771	0	0	4	3.30771	0	0	4.1	3.30771	0	0	4.2	3.32077	0	0	3	3.32077	0	0	3.1	3.32077	0	0	3.2	3.31926	0	0	2	3.31926	0	0	2.1	3.31926	0	0	2.2	3.3358	0	0	1	3.3358	0	0	1.1	3.3358	0	0	1.2	3.31677
	3.30919	0	0	4	3.30919	0	0	4.1	3.30919	0	0	4.2	3.32528	0	0	3	3.32528	0	0	3.1	3.32528	0	0	3.2	3.32377	0	0	2	3.32377	0	0	2.1	3.32377	0	0	2.2	3.33728	0	0	1	3.33728	0	0	1.1	3.33728	0	0	1.2	3.32128
	3.3107	0	0	4	3.3107	0	0	4.1	3.3107	0	0	4.2	3.32677	0	0	3	3.32677	0	0	3.1	3.32677	0	0	3.2	3.32526	0	0	2	3.32526	0	0	2.1	3.32526	0	0	2.2	3.33849	0	0	1	3.33849	0	0	1.1	3.33849	0	0	1.2	3.32277
	3.3119	0	0	4	3.3119	0	0	4.1	3.3119	0	0	4.2	3.32825	0	0	3	3.32825	0	0	3.1	3.32825	0	0	3.2	3.32675	0	0	2	3.32675	0	0	2.1	3.32675	0	0	2.2	3.34311	0	0	1	3.34311	0	0	1.1	3.34311	0	0	1.2	3.32398
	3.31641	0	0	4	3.31641	0	0	4.1	3.31641	0	0	4.2	3.32946	0	0	3	3.32946	0	0	3.1	3.32946	0	0	3.2	3.32795	0	0	2	3.32795	0	0	2.1	3.32795	0	0	2.2	3.34459	0	0	1	3.34459	0	0	1.1	3.34459	0	0	1.2	3.32872
	3.3179	0	0	4	3.3179	0	0	4.1	3.3179	0	0	4.2	3.33397	0	0	3	3.33397	0	0	3.1	3.33397	0	0	3.2	3.33246	0	0	2	3.33246	0	0	2.1	3.33246	0	0	2.2	3.34587	0	0	1	3.34587	0	0	1.1	3.34587	0	0	1.2	3.3302
	3.31938	0	0	4	3.31938	0	0	4.1	3.31938	0	0	4.2	3.33545	0	0	3	3.33545	0	0	3.1	3.33545	0	0	3.2	3.33367	0	0	2	3.33367	0	0	2.1	3.33367	0	0	2.2	3.34708	0	0	1	3.34708	0	0	1.1	3.34708	0	0	1.2	3.33169
	3.32059	0	0	4	3.32059	0	0	4.1	3.32059	0	0	4.2	3.33694	0	0	3	3.33694	0	0	3.1	3.33694	0	0	3.2	3.33817	0	0	2	3.33817	0	0	2.1	3.33817	0	0	2.2	3.35159	0	0	1	3.35159	0	0	1.1	3.35159	0	0	1.2	3.33382
	3.3251	0	0	4	3.3251	0	0	4.1	3.3251	0	0	4.2	3.33815	0	0	3	3.33815	0	0	3.1	3.33815	0	0	3.2	3.33966	0	0	2	3.33966	0	0	2.1	3.33966	0	0	2.2	3.35307	0	0	1	3.35307	0	0	1.1	3.35307	0	0	1.2	3.33833
	3.32658	0	0	4	3.32658	0	0	4.1	3.32658	0	0	4.2	3.34276	0	0	3	3.34276	0	0	3.1	3.34276	0	0	3.2	3.34087	0	0	2	3.34087	0	0	2.1	3.34087	0	0	2.2	3.35456	0	0	1	3.35456	0	0	1.1	3.35456	0	0	1.2	3.33981
	3.32779	0	0	4	3.32779	0	0	4.1	3.32779	0	0	4.2	3.34425	0	0	3	3.34425	0	0	3.1	3.34425	0	0	3.2	3.34537	0	0	2	3.34537	0	0	2.1	3.34537	0	0	2.2	3.35577	0	0	1	3.35577	0	0	1.1	3.35577	0	0	1.2	3.3413
	3.3323	0	0	4	3.3323	0	0	4.1	3.3323	0	0	4.2	3.34553	0	0	3	3.34553	0	0	3.1	3.34553	0	0	3.2	3.34686	0	0	2	3.34686	0	0	2.1	3.34686	0	0	2.2	3.36027	0	0	1	3.36027	0	0	1.1	3.36027	0	0	1.2	3.3425
	3.33378	0	0	4	3.33378	0	0	4.1	3.33378	0	0	4.2	3.34674	0	0	3	3.34674	0	0	3.1	3.34674	0	0	3.2	3.34835	0	0	2	3.34835	0	0	2.1	3.34835	0	0	2.2	3.36176	0	0	1	3.36176	0	0	1.1	3.36176	0	0	1.2	3.34701
	3.33527	0	0	4	3.33527	0	0	4.1	3.33527	0	0	4.2	3.35125	0	0	3	3.35125	0	0	3.1	3.35125	0	0	3.2	3.34955	0	0	2	3.34955	0	0	2.1	3.34955	0	0	2.2	3.36312	0	0	1	3.36312	0	0	1.1	3.36312	0	0	1.2	3.3485
	3.33647	0	0	4	3.33647	0	0	4.1	3.33647	0	0	4.2	3.35273	0	0	3	3.35273	0	0	3.1	3.35273	0	0	3.2	3.35406	0	0	2	3.35406	0	0	2.1	3.35406	0	0	2.2	3.36432	0	0	1	3.36432	0	0	1.1	3.36432	0	0	1.2	3.34998
	3.34098	0	0	4	3.34098	0	0	4.1	3.34098	0	0	4.2	3.35393	0	0	3	3.35393	0	0	3.1	3.35393	0	0	3.2	3.35555	0	0	2	3.35555	0	0	2.1	3.35555	0	0	2.2	3.36883	0	0	1	3.36883	0	0	1.1	3.36883	0	0	1.2	3.35119
	3.34247	0	0	4	3.34247	0	0	4.1	3.34247	0	0	4.2	3.35844	0	0	3	3.35844	0	0	3.1	3.35844	0	0	3.2	3.35703	0	0	2	3.35703	0	0	2.1	3.35703	0	0	2.2	3.37031	0	0	1	3.37031	0	0	1.1	3.37031	0	0	1.2	3.3557
	3.34396	0	0	4	3.34396	0	0	4.1	3.34396	0	0	4.2	3.35993	0	0	3	3.35993	0	0	3.1	3.35993	0	0	3.2	3.35824	0	0	2	3.35824	0	0	2.1	3.35824	0	0	2.2	3.3718	0	0	1	3.3718	0	0	1.1	3.3718	0	0	1.2	3.35718
	3.34516	0	0	4	3.34516	0	0	4.1	3.34516	0	0	4.2	3.36113	0	0	3	3.36113	0	0	3.1	3.36113	16166.7	0.000134418	3.20013	3.36275	0	0	2	3.36275	0	0	2.1	3.36275	0	0	2.2	3.37301	0	0	1	3.37301	0	0	1.1	3.37301	0	0	1.2	3.35839
	3.34967	0	0	4	3.34967	0	0	4.1	3.34967	0	0	4.2	3.36588	0	0	3	3.36588	0	0	3.1	3.36588	0	0	3.2	3.36423	0	0	2	3.36423	0	0	2.1	3.36423	0	0	2.2	3.37751	0	0	1	3.37751	0	0	1.1	3.37751	0	0	1.2	3.36313
	3.35116	0	0	4	3.35116	0	0	4.1	3.35116	0	0	4.2	3.36737	0	0	3	3.36737	0	0	3.1	3.36737	0	0	3.2	3.36572	0	0	2	3.36572	0	0	2.1	3.36572	0	0	2.2	3.379	0	0	1	3.379	0	0	1.1	3.379	0	0	1.2	3.36461
	3.35264	0	0	4	3.35264	0	0	4.1	3.35264	0	0	4.2	3.36857	0	0	3	3.36857	0	0	3.1	3.36857	0	0	3.2	3.36692	0	0	2	3.36692	0	0	2.1	3.36692	0	0	2.2	3.38048	0	0	1	3.38048	0	0	1.1	3.38048	0	0	1.2	3.3661
	3.35385	0	0	4	3.35385	0	0	4.1	3.35385	0	0	4.2	3.37308	0	0	3	3.37308	0	0	3.1	3.37308	0	0	3.2	3.37143	0	0	2	3.37143	0	0	2.1	3.37143	0	0	2.2	3.38169	0	0	1	3.38169	0	0	1.1	3.38169	0	0	1.2	3.36821
	3.35835	0	0	4	3.35835	0	0	4.1	3.35835	0	0	4.2	3.37457	0	0	3	3.37457	0	0	3.1	3.37457	0	0	3.2	3.37292	0	0	2	3.37292	0	0	2.1	3.37292	0	0	2.2	3.3862	0	0	1	3.3862	0	0	1.1	3.3862	0	0	1.2	3.37272
	3.35984	0	0	4	3.35984	0	0	4.1	3.35984	0	0	4.2	3.37607	0	0	3	3.37607	0	0	3.1	3.37607	0	0	3.2	3.37423	0	0	2	3.37423	0	0	2.1	3.37423	0	0	2.2	3.38769	0	0	1	3.38769	0	0	1.1	3.38769	0	0	1.2	3.37421
	3.3611	0	0	4	3.3611	0	0	4.1	3.3611	0	0	4.2	3.37727	0	0	3	3.37727	0	0	3.1	3.37727	0	0	3.2	3.37543	0	0	2	3.37543	0	0	2.1	3.37543	0	0	2.2	3.38917	0	0	1	3.38917	0	0	1.1	3.38917	0	0	1.2	3.37541
	3.3623	0	0	4	3.3623	0	0	4.1	3.3623	0	0	4.2	3.38178	0	0	3	3.38178	0	0	3.1	3.38178	0	0	3.2	3.37994	0	0	2	3.37994	0	0	2.1	3.37994	0	0	2.2	3.39038	0	0	1	3.39038	0	0	1.1	3.39038	0	0	1.2	3.37992
	3.36681	0	0	4	3.36681	0	0	4.1	3.36681	0	0	4.2	3.38299	0	0	3	3.38299	0	0	3.1	3.38299	0	0	3.2	3.38143	0	0	2	3.38143	0	0	2.1	3.38143	0	0	2.2	3.39489	0	0	1	3.39489	0	0	1.1	3.39489	0	0	1.2	3.38143
	3.3683	0	0	4	3.3683	0	0	4.1	3.3683	0	0	4.2	3.3875	0	0	3	3.3875	0	0	3.1	3.3875	0	0	3.2	3.38291	0	0	2	3.38291	0	0	2.1	3.38291	0	0	2.2	3.39637	0	0	1	3.39637	0	0	1.1	3.39637	0	0	1.2	3.38291
	3.36978	0	0	4	3.36978	0	0	4.1	3.36978	0	0	4.2	3.38898	0	0	3	3.38898	0	0	3.1	3.38898	0	0	3.2	3.38412	0	0	2	3.38412	0	0	2.1	3.38412	0	0	2.2	3.39758	0	0	1	3.39758	0	0	1.1	3.39758	0	0	1.2	3.38412
	3.37099	0	0	4	3.37099	0	0	4.1	3.37099	0	0	4.2	3.39047	0	0	3	3.39047	0	0	3.1	3.39047	0	0	3.2	3.38862	0	0	2	3.38862	0	0	2.1	3.38862	0	0	2.2	3.40209	0	0	1	3.40209	0	0	1.1	3.40209	0	0	1.2	3.38863
	3.37565	0	0	4	3.37565	0	0	4.1	3.37565	0	0	4.2	3.39167	0	0	3	3.39167	0	0	3.1	3.39167	0	0	3.2	3.38983	0	0	2	3.38983	0	0	2.1	3.38983	0	0	2.2	3.40334	0	0	1	3.40334	0	0	1.1	3.40334	0	0	1.2	3.39009
	3.3769	0	0	4	3.3769	0	0	4.1	3.3769	0	0	4.2	3.39618	0	0	3	3.39618	0	0	3.1	3.39618	0	0	3.2	3.39457	0	0	2	3.39457	0	0	2.1	3.39457	0	0	2.2	3.40483	0	0	1	3.40483	0	0	1.1	3.40483	0	0	1.2	3.3913
	3.37839	0	0	4	3.37839	0	0	4.1	3.37839	0	0	4.2	3.39767	0	0	3	3.39767	0	0	3.1	3.39767	0	0	3.2	3.39605	0	0	2	3.39605	0	0	2.1	3.39605	0	0	2.2	3.40603	0	0	1	3.40603	0	0	1.1	3.40603	0	0	1.2	3.3958
	3.38054	0	0	4	3.38054	0	0	4.1	3.38054	0	0	4.2	3.39915	0	0	3	3.39915	0	0	3.1	3.39915	0	0	3.2	3.39754	0	0	2	3.39754	0	0	2.1	3.39754	0	0	2.2	3.41054	0	0	1	3.41054	0	0	1.1	3.41054	0	0	1.2	3.39729
	3.38505	0	0	4	3.38505	0	0	4.1	3.38505	0	0	4.2	3.40036	0	0	3	3.40036	0	0	3.1	3.40036	0	0	3.2	3.3997	0	0	2	3.3997	0	0	2.1	3.3997	0	0	2.2	3.41203	0	0	1	3.41203	0	0	1.1	3.41203	0	0	1.2	3.39854
	3.38654	0	0	4	3.38654	0	0	4.1	3.38654	0	0	4.2	3.40509	0	0	3	3.40509	0	0	3.1	3.40509	0	0	3.2	3.40444	0	0	2	3.40444	0	0	2.1	3.40444	0	0	2.2	3.41352	0	0	1	3.41352	0	0	1.1	3.41352	0	0	1.2	3.39975
	3.38774	0	0	4	3.38774	0	0	4.1	3.38774	0	0	4.2	3.40635	0	0	3	3.40635	0	0	3.1	3.40635	0	0	3.2	3.40593	0	0	2	3.40593	0	0	2.1	3.40593	0	0	2.2	3.41472	0	0	1	3.41472	0	0	1.1	3.41472	0	0	1.2	3.40426
	3.39225	0	0	4	3.39225	0	0	4.1	3.39225	0	0	4.2	3.40756	0	0	3	3.40756	0	0	3.1	3.40756	0	0	3.2	3.40741	0	0	2	3.40741	0	0	2.1	3.40741	0	0	2.2	3.41923	0	0	1	3.41923	0	0	1.1	3.41923	0	0	1.2	3.40574
	3.39361	0	0	4	3.39361	0	0	4.1	3.39361	0	0	4.2	3.41207	0	0	3	3.41207	0	0	3.1	3.41207	0	0	3.2	3.40957	0	0	2	3.40957	0	0	2.1	3.40957	0	0	2.2	3.42072	0	0	1	3.42072	0	0	1.1	3.42072	0	0	1.2	3.40723
	3.3951	0	0	4	3.3951	0	0	4.1	3.3951	0	0	4.2	3.41356	0	0	3	3.41356	0	0	3.1	3.41356	0	0	3.2	3.41408	0	0	2	3.41408	0	0	2.1	3.41408	0	0	2.2	3.42192	0	0	1	3.42192	0	0	1.1	3.42192	0	0	1.2	3.40844
	3.3963	0	0	4	3.3963	0	0	4.1	3.3963	0	0	4.2	3.41504	0	0	3	3.41504	0	0	3.1	3.41504	0	0	3.2	3.41557	0	0	2	3.41557	0	0	2.1	3.41557	0	0	2.2	3.42643	0	0	1	3.42643	0	0	1.1	3.42643	0	0	1.2	3.41295
	3.40081	0	0	4	3.40081	0	0	4.1	3.40081	0	0	4.2	3.41625	0	0	3	3.41625	0	0	3.1	3.41625	0	0	3.2	3.41705	0	0	2	3.41705	0	0	2.1	3.41705	0	0	2.2	3.42904	0	0	1	3.42904	0	0	1.1	3.42904	0	0	1.2	3.41443
	3.40222	0	0	4	3.40222	0	0	4.1	3.40222	0	0	4.2	3.42076	0	0	3	3.42076	0	0	3.1	3.42076	0	0	3.2	3.41826	0	0	2	3.41826	0	0	2.1	3.41826	0	0	2.2	3.43024	0	0	1	3.43024	0	0	1.1	3.43024	0	0	1.2	3.41592
	3.40343	0	0	4	3.40343	0	0	4.1	3.40343	0	0	4.2	3.42224	0	0	3	3.42224	0	0	3.1	3.42224	0	0	3.2	3.42277	0	0	2	3.42277	0	0	2.1	3.42277	0	0	2.2	3.43498	0	0	1	3.43498	0	0	1.1	3.43498	0	0	1.2	3.41712
	3.40794	0	0	4	3.40794	0	0	4.1	3.40794	0	0	4.2	3.42373	0	0	3	3.42373	0	0	3.1	3.42373	0	0	3.2	3.42426	0	0	2	3.42426	0	0	2.1	3.42426	0	0	2.2	3.43647	0	0	1	3.43647	0	0	1.1	3.43647	0	0	1.2	3.42163
	3.40942	0	0	4	3.40942	0	0	4.1	3.40942	0	0	4.2	3.42493	0	0	3	3.42493	0	0	3.1	3.42493	0	0	3.2	3.42546	0	0	2	3.42546	0	0	2.1	3.42546	0	0	2.2	3.43767	0	0	1	3.43767	0	0	1.1	3.43767	0	0	1.2	3.42312
	3.41091	0	0	4	3.41091	0	0	4.1	3.41091	0	0	4.2	3.42944	0	0	3	3.42944	0	0	3.1	3.42944	0	0	3.2	3.42998	0	0	2	3.42998	0	0	2.1	3.42998	0	0	2.2	3.44218	0	0	1	3.44218	0	0	1.1	3.44218	0	0	1.2	3.4246
	3.41211	0	0	4	3.41211	0	0	4.1	3.41211	0	0	4.2	3.43065	0	0	3	3.43065	0	0	3.1	3.43065	0	0	3.2	3.43147	0	0	2	3.43147	0	0	2.1	3.43147	0	0	2.2	3.44367	0	0	1	3.44367	0	0	1.1	3.44367	0	0	1.2	3.42581
	3.41662	0	0	4	3.41662	0	0	4.1	3.41662	0	0	4.2	3.43515	0	0	3	3.43515	0	0	3.1	3.43515	0	0	3.2	3.43273	0	0	2	3.43273	0	0	2.1	3.43273	0	0	2.2	3.44487	0	0	1	3.44487	0	0	1.1	3.44487	0	0	1.2	3.43032
	3.41783	0	0	4	3.41783	0	0	4.1	3.41783	0	0	4.2	3.43664	0	0	3	3.43664	0	0	3.1	3.43664	0	0	3.2	3.43393	0	0	2	3.43393	0	0	2.1	3.43393	0	0	2.2	3.44938	0	0	1	3.44938	0	0	1.1	3.44938	0	0	1.2	3.4318
	3.42234	0	0	4	3.42234	0	0	4.1	3.42234	0	0	4.2	3.43813	0	0	3	3.43813	0	0	3.1	3.43813	0	0	3.2	3.43844	0	0	2	3.43844	0	0	2.1	3.43844	0	0	2.2	3.45087	0	0	1	3.45087	0	0	1.1	3.45087	0	0	1.2	3.43301
	3.42382	0	0	4	3.42382	0	0	4.1	3.42382	0	0	4.2	3.43933	0	0	3	3.43933	0	0	3.1	3.43933	0	0	3.2	3.43993	0	0	2	3.43993	0	0	2.1	3.43993	0	0	2.2	3.45235	0	0	1	3.45235	0	0	1.1	3.45235	0	0	1.2	3.43752
	3.42531	0	0	4	3.42531	0	0	4.1	3.42531	0	0	4.2	3.44384	0	0	3	3.44384	0	0	3.1	3.44384	0	0	3.2	3.44141	0	0	2	3.44141	0	0	2.1	3.44141	0	0	2.2	3.45356	0	0	1	3.45356	0	0	1.1	3.45356	0	0	1.2	3.439
	3.42652	0	0	4	3.42652	0	0	4.1	3.42652	0	0	4.2	3.44532	0	0	3	3.44532	0	0	3.1	3.44532	0	0	3.2	3.44262	0	0	2	3.44262	0	0	2.1	3.44262	0	0	2.2	3.45807	0	0	1	3.45807	0	0	1.1	3.45807	0	0	1.2	3.44021
	3.43113	0	0	4	3.43113	0	0	4.1	3.43113	0	0	4.2	3.44681	0	0	3	3.44681	0	0	3.1	3.44681	0	0	3.2	3.44713	0	0	2	3.44713	0	0	2.1	3.44713	0	0	2.2	3.45955	0	0	1	3.45955	0	0	1.1	3.45955	0	0	1.2	3.44472
	3.43262	0	0	4	3.43262	0	0	4.1	3.43262	0	0	4.2	3.44802	0	0	3	3.44802	0	0	3.1	3.44802	0	0	3.2	3.44862	0	0	2	3.44862	0	0	2.1	3.44862	0	0	2.2	3.46076	0	0	1	3.46076	0	0	1.1	3.46076	0	0	1.2	3.4462
	3.43411	0	0	4	3.43411	0	0	4.1	3.43411	0	0	4.2	3.45252	0	0	3	3.45252	0	0	3.1	3.45252	0	0	3.2	3.4501	0	0	2	3.4501	0	0	2.1	3.4501	0	0	2.2	3.46527	0	0	1	3.46527	0	0	1.1	3.46527	0	0	1.2	3.44769
	3.43531	0	0	4	3.43531	0	0	4.1	3.43531	0	0	4.2	3.45401	0	0	3	3.45401	0	0	3.1	3.45401	0	0	3.2	3.45131	0	0	2	3.45131	0	0	2.1	3.45131	0	0	2.2	3.46725	0	0	1	3.46725	0	0	1.1	3.46725	0	0	1.2	3.44889
	3.43982	0	0	4	3.43982	0	0	4.1	3.43982	0	0	4.2	3.45522	0	0	3	3.45522	0	0	3.1	3.45522	0	0	3.2	3.45605	0	0	2	3.45605	0	0	2.1	3.45605	0	0	2.2	3.47176	0	0	1	3.47176	0	0	1.1	3.47176	0	0	1.2	3.45363
	3.44131	0	0	4	3.44131	0	0	4.1	3.44131	0	0	4.2	3.45973	0	0	3	3.45973	0	0	3.1	3.45973	0	0	3.2	3.45753	0	0	2	3.45753	0	0	2.1	3.45753	0	0	2.2	3.47325	0	0	1	3.47325	0	0	1.1	3.47325	0	0	1.2	3.45483
	3.44279	0	0	4	3.44279	0	0	4.1	3.44279	0	0	4.2	3.46121	0	0	3	3.46121	0	0	3.1	3.46121	0	0	3.2	3.45902	0	0	2	3.45902	0	0	2.1	3.45902	0	0	2.2	3.47473	0	0	1	3.47473	0	0	1.1	3.47473	0	0	1.2	3.45934
	3.444	0	0	4	3.444	0	0	4.1	3.444	0	0	4.2	3.46272	0	0	3	3.46272	0	0	3.1	3.46272	0	0	3.2	3.46118	0	0	2	3.46118	0	0	2.1	3.46118	0	0	2.2	3.47594	0	0	1	3.47594	0	0	1.1	3.47594	0	0	1.2	3.4606
	3.44851	0	0	4	3.44851	0	0	4.1	3.44851	0	0	4.2	3.46392	0	0	3	3.46392	0	0	3.1	3.46392	0	0	3.2	3.46569	0	0	2	3.46569	0	0	2.1	3.46569	0	0	2.2	3.48045	0	0	1	3.48045	0	0	1.1	3.48045	0	0	1.2	3.46209
	3.44999	0	0	4	3.44999	0	0	4.1	3.44999	0	0	4.2	3.46866	0	0	3	3.46866	0	0	3.1	3.46866	0	0	3.2	3.46718	0	0	2	3.46718	0	0	2.1	3.46718	0	0	2.2	3.48193	0	0	1	3.48193	0	0	1.1	3.48193	0	0	1.2	3.4633
	3.45148	0	0	4	3.45148	0	0	4.1	3.45148	0	0	4.2	3.47014	0	0	3	3.47014	0	0	3.1	3.47014	0	0	3.2	3.46838	0	0	2	3.46838	0	0	2.1	3.46838	0	0	2.2	3.48342	0	0	1	3.48342	0	0	1.1	3.48342	0	0	1.2	3.46803
	3.45268	0	0	4	3.45268	0	0	4.1	3.45268	0	0	4.2	3.47163	0	0	3	3.47163	0	0	3.1	3.47163	0	0	3.2	3.47289	0	0	2	3.47289	0	0	2.1	3.47289	0	0	2.2	3.48462	0	0	1	3.48462	0	0	1.1	3.48462	0	0	1.2	3.46924
	3.45742	0	0	4	3.45742	0	0	4.1	3.45742	0	0	4.2	3.47377	0	0	3	3.47377	0	0	3.1	3.47377	0	0	3.2	3.47438	0	0	2	3.47438	0	0	2.1	3.47438	0	0	2.2	3.48913	0	0	1	3.48913	0	0	1.1	3.48913	0	0	1.2	3.47375
	3.4589	0	0	4	3.4589	0	0	4.1	3.4589	0	0	4.2	3.47851	0	0	3	3.47851	0	0	3.1	3.47851	0	0	3.2	3.47586	0	0	2	3.47586	0	0	2.1	3.47586	0	0	2.2	3.49062	0	0	1	3.49062	0	0	1.1	3.49062	0	0	1.2	3.47523
	3.46039	0	0	4	3.46039	0	0	4.1	3.46039	0	0	4.2	3.48	0	0	3	3.48	0	0	3.1	3.48	0	0	3.2	3.47707	0	0	2	3.47707	0	0	2.1	3.47707	0	0	2.2	3.4921	0	0	1	3.4921	0	0	1.1	3.4921	0	0	1.2	3.47672
	3.46253	0	0	4	3.46253	0	0	4.1	3.46253	0	0	4.2	3.48148	0	0	3	3.48148	0	0	3.1	3.48148	0	0	3.2	3.48158	0	0	2	3.48158	0	0	2.1	3.48158	0	0	2.2	3.49331	0	0	1	3.49331	0	0	1.1	3.49331	0	0	1.2	3.47793
	3.46704	0	0	4	3.46704	0	0	4.1	3.46704	0	0	4.2	3.48362	0	0	3	3.48362	0	0	3.1	3.48362	0	0	3.2	3.48306	0	0	2	3.48306	0	0	2.1	3.48306	0	0	2.2	3.49782	0	0	1	3.49782	0	0	1.1	3.49782	0	0	1.2	3.48267
	3.46853	0	0	4	3.46853	0	0	4.1	3.46853	0	0	4.2	3.48813	0	0	3	3.48813	0	0	3.1	3.48813	0	0	3.2	3.48427	0	0	2	3.48427	0	0	2.1	3.48427	0	0	2.2	3.4993	0	0	1	3.4993	0	0	1.1	3.4993	0	0	1.2	3.48415
	3.47002	0	0	4	3.47002	0	0	4.1	3.47002	0	0	4.2	3.48962	0	0	3	3.48962	0	0	3.1	3.48962	0	0	3.2	3.48878	0	0	2	3.48878	0	0	2.1	3.48878	0	0	2.2	3.50079	0	0	1	3.50079	0	0	1.1	3.50079	0	0	1.2	3.48564
	3.47122	0	0	4	3.47122	0	0	4.1	3.47122	0	0	4.2	3.4911	0	0	3	3.4911	0	0	3.1	3.4911	0	0	3.2	3.49026	0	0	2	3.49026	0	0	2.1	3.49026	0	0	2.2	3.50199	0	0	1	3.50199	0	0	1.1	3.50199	0	0	1.2	3.48776
	3.47573	0	0	4	3.47573	0	0	4.1	3.47573	0	0	4.2	3.49231	0	0	3	3.49231	0	0	3.1	3.49231	0	0	3.2	3.4916	0	0	2	3.4916	0	0	2.1	3.4916	0	0	2.2	3.5065	0	0	1	3.5065	0	0	1.1	3.5065	0	0	1.2	3.49227
	3.47722	0	0	4	3.47722	0	0	4.1	3.47722	0	0	4.2	3.49682	0	0	3	3.49682	0	0	3.1	3.49682	0	0	3.2	3.49281	0	0	2	3.49281	0	0	2.1	3.49281	0	0	2.2	3.50799	0	0	1	3.50799	0	0	1.1	3.50799	0	0	1.2	3.49376
	3.47872	0	0	4	3.47872	0	0	4.1	3.47872	0	0	4.2	3.4983	0	0	3	3.4983	0	0	3.1	3.4983	0	0	3.2	3.49732	0	0	2	3.49732	0	0	2.1	3.49732	0	0	2.2	3.50931	0	0	1	3.50931	0	0	1.1	3.50931	0	0	1.2	3.49524
	3.47992	0	0	4	3.47992	0	0	4.1	3.47992	0	0	4.2	3.49979	0	0	3	3.49979	0	0	3.1	3.49979	0	0	3.2	3.4988	0	0	2	3.4988	0	0	2.1	3.4988	0	0	2.2	3.51051	0	0	1	3.51051	0	0	1.1	3.51051	0	0	1.2	3.49645
	3.48466	0	0	4	3.48466	0	0	4.1	3.48466	0	0	4.2	3.501	0	0	3	3.501	0	0	3.1	3.501	0	0	3.2	3.50001	0	0	2	3.50001	0	0	2.1	3.50001	0	0	2.2	3.51513	0	0	1	3.51513	0	0	1.1	3.51513	0	0	1.2	3.50096
	3.48615	0	0	4	3.48615	0	0	4.1	3.48615	0	0	4.2	3.5055	0	0	3	3.5055	0	0	3.1	3.5055	0	0	3.2	3.50452	0	0	2	3.50452	0	0	2.1	3.50452	0	0	2.2	3.51661	0	0	1	3.51661	0	0	1.1	3.51661	0	0	1.2	3.50244
	3.48735	0	0	4	3.48735	0	0	4.1	3.48735	0	0	4.2	3.50699	0	0	3	3.50699	0	0	3.1	3.50699	0	0	3.2	3.506	0	0	2	3.506	0	0	2.1	3.506	0	0	2.2	3.51782	0	0	1	3.51782	0	0	1.1	3.51782	0	0	1.2	3.50393
	3.49186	0	0	4	3.49186	0	0	4.1	3.49186	0	0	4.2	3.50836	0	0	3	3.50836	0	0	3.1	3.50836	0	0	3.2	3.50749	0	0	2	3.50749	0	0	2.1	3.50749	0	0	2.2	3.52256	0	0	1	3.52256	0	0	1.1	3.52256	0	0	1.2	3.50513
	3.49336	0	0	4	3.49336	0	0	4.1	3.49336	0	0	4.2	3.50957	0	0	3	3.50957	0	0	3.1	3.50957	0	0	3.2	3.5087	0	0	2	3.5087	0	0	2.1	3.5087	0	0	2.2	3.52386	0	0	1	3.52386	0	0	1.1	3.52386	0	0	1.2	3.50966
	3.49457	0	0	4	3.49457	0	0	4.1	3.49457	0	0	4.2	3.51418	0	0	3	3.51418	0	0	3.1	3.51418	0	0	3.2	3.51533	0	0	2	3.51533	0	0	2.1	3.51533	0	0	2.2	3.52534	0	0	1	3.52534	0	0	1.1	3.52534	0	0	1.2	3.51115
	3.49908	0	0	4	3.49908	0	0	4.1	3.49908	0	0	4.2	3.51567	0	0	3	3.51567	0	0	3.1	3.51567	0	0	3.2	3.51682	0	0	2	3.51682	0	0	2.1	3.51682	0	0	2.2	3.52752	0	0	1	3.52752	0	0	1.1	3.52752	0	0	1.2	3.5124
	3.50056	0	0	4	3.50056	0	0	4.1	3.50056	0	0	4.2	3.51687	0	0	3	3.51687	0	0	3.1	3.51687	0	0	3.2	3.51803	0	0	2	3.51803	0	0	2.1	3.51803	0	0	2.2	3.53203	0	0	1	3.53203	0	0	1.1	3.53203	0	0	1.2	3.51361
	3.50205	0	0	4	3.50205	0	0	4.1	3.50205	0	0	4.2	3.52138	0	0	3	3.52138	0	0	3.1	3.52138	0	0	3.2	3.52253	0	0	2	3.52253	0	0	2.1	3.52253	0	0	2.2	3.53351	0	0	1	3.53351	0	0	1.1	3.53351	0	0	1.2	3.51812
	3.50325	0	0	4	3.50325	0	0	4.1	3.50325	0	0	4.2	3.52287	0	0	3	3.52287	0	0	3.1	3.52287	0	0	3.2	3.52402	0	0	2	3.52402	0	0	2.1	3.52402	0	0	2.2	3.53472	0	0	1	3.53472	0	0	1.1	3.53472	0	0	1.2	3.5196
	3.50776	0	0	4	3.50776	0	0	4.1	3.50776	0	0	4.2	3.52436	0	0	3	3.52436	0	0	3.1	3.52436	0	0	3.2	3.52523	0	0	2	3.52523	0	0	2.1	3.52523	0	0	2.2	3.53923	0	0	1	3.53923	0	0	1.1	3.53923	0	0	1.2	3.52081
	3.50925	0	0	4	3.50925	0	0	4.1	3.50925	0	0	4.2	3.52556	0	0	3	3.52556	0	0	3.1	3.52556	0	0	3.2	3.52974	0	0	2	3.52974	0	0	2.1	3.52974	0	0	2.2	3.54071	0	0	1	3.54071	0	0	1.1	3.54071	0	0	1.2	3.52532
	3.51074	0	0	4	3.51074	0	0	4.1	3.51074	0	0	4.2	3.53007	0	0	3	3.53007	0	0	3.1	3.53007	0	0	3.2	3.53122	0	0	2	3.53122	0	0	2.1	3.53122	0	0	2.2	3.5422	0	0	1	3.5422	0	0	1.1	3.5422	0	0	1.2	3.5268
	3.51194	0	0	4	3.51194	0	0	4.1	3.51194	0	0	4.2	3.53156	0	0	3	3.53156	0	0	3.1	3.53156	0	0	3.2	3.53251	0	0	2	3.53251	0	0	2.1	3.53251	0	0	2.2	3.5434	0	0	1	3.5434	0	0	1.1	3.5434	0	0	1.2	3.52829
	3.51645	0	0	4	3.51645	0	0	4.1	3.51645	0	0	4.2	3.53276	0	0	3	3.53276	0	0	3.1	3.53276	0	0	3.2	3.53371	0	0	2	3.53371	0	0	2.1	3.53371	0	0	2.2	3.54791	0	0	1	3.54791	0	0	1.1	3.54791	0	0	1.2	3.52949
	3.51794	0	0	4	3.51794	0	0	4.1	3.51794	0	0	4.2	3.53727	0	0	3	3.53727	0	0	3.1	3.53727	0	0	3.2	3.53822	0	0	2	3.53822	0	0	2.1	3.53822	0	0	2.2	3.5494	0	0	1	3.5494	0	0	1.1	3.5494	0	0	1.2	3.534
	3.5194	0	0	4	3.5194	0	0	4.1	3.5194	0	0	4.2	3.53876	0	0	3	3.53876	0	0	3.1	3.53876	0	0	3.2	3.53942	0	0	2	3.53942	0	0	2.1	3.53942	0	0	2.2	3.55089	0	0	1	3.55089	0	0	1.1	3.55089	0	0	1.2	3.53549
	3.5206	0	0	4	3.5206	0	0	4.1	3.5206	0	0	4.2	3.54024	0	0	3	3.54024	0	0	3.1	3.54024	0	0	3.2	3.54393	0	0	2	3.54393	0	0	2.1	3.54393	0	0	2.2	3.55209	0	0	1	3.55209	0	0	1.1	3.55209	0	0	1.2	3.53697
	3.52511	0	0	4	3.52511	0	0	4.1	3.52511	0	0	4.2	3.54145	0	0	3	3.54145	0	0	3.1	3.54145	0	0	3.2	3.54542	0	0	2	3.54542	0	0	2.1	3.54542	0	0	2.2	3.5566	0	0	1	3.5566	0	0	1.1	3.5566	0	0	1.2	3.53818
	3.5266	0	0	4	3.5266	0	0	4.1	3.5266	0	0	4.2	3.54596	0	0	3	3.54596	0	0	3.1	3.54596	0	0	3.2	3.5469	0	0	2	3.5469	0	0	2.1	3.5469	0	0	2.2	3.55809	0	0	1	3.55809	0	0	1.1	3.55809	0	0	1.2	3.54269
	3.52791	0	0	4	3.52791	0	0	4.1	3.52791	0	0	4.2	3.54744	0	0	3	3.54744	0	0	3.1	3.54744	0	0	3.2	3.54811	0	0	2	3.54811	0	0	2.1	3.54811	0	0	2.2	3.55929	0	0	1	3.55929	0	0	1.1	3.55929	0	0	1.2	3.54389
	3.52912	0	0	4	3.52912	0	0	4.1	3.52912	0	0	4.2	3.54865	0	0	3	3.54865	0	0	3.1	3.54865	0	0	3.2	3.55266	0	0	2	3.55266	0	0	2.1	3.55266	0	0	2.2	3.5638	0	0	1	3.5638	0	0	1.1	3.5638	0	0	1.2	3.54847
	3.53363	0	0	4	3.53363	0	0	4.1	3.53363	0	0	4.2	3.55316	0	0	3	3.55316	0	0	3.1	3.55316	0	0	3.2	3.55415	0	0	2	3.55415	0	0	2.1	3.55415	0	0	2.2	3.56529	0	0	1	3.56529	0	0	1.1	3.56529	0	0	1.2	3.54996
	3.53511	0	0	4	3.53511	0	0	4.1	3.53511	0	0	4.2	3.55464	0	0	3	3.55464	0	0	3.1	3.55464	0	0	3.2	3.55535	0	0	2	3.55535	0	0	2.1	3.55535	0	0	2.2	3.56654	0	0	1	3.56654	0	0	1.1	3.56654	0	0	1.2	3.55144
	3.53637	0	0	4	3.53637	0	0	4.1	3.53637	0	0	4.2	3.55585	0	0	3	3.55585	0	0	3.1	3.55585	0	0	3.2	3.55986	0	0	2	3.55986	0	0	2.1	3.55986	0	0	2.2	3.56775	0	0	1	3.56775	0	0	1.1	3.56775	0	0	1.2	3.55357
	3.53758	0	0	4	3.53758	0	0	4.1	3.53758	0	0	4.2	3.56036	0	0	3	3.56036	0	0	3.1	3.56036	0	0	3.2	3.56135	0	0	2	3.56135	0	0	2.1	3.56135	0	0	2.2	3.57226	0	0	1	3.57226	0	0	1.1	3.57226	0	0	1.2	3.55808
	3.54209	0	0	4	3.54209	0	0	4.1	3.54209	0	0	4.2	3.56184	0	0	3	3.56184	0	0	3.1	3.56184	0	0	3.2	3.56255	0	0	2	3.56255	0	0	2.1	3.56255	0	0	2.2	3.57374	0	0	1	3.57374	0	0	1.1	3.57374	0	0	1.2	3.55938
	3.54357	0	0	4	3.54357	0	0	4.1	3.54357	0	0	4.2	3.56305	0	0	3	3.56305	0	0	3.1	3.56305	0	0	3.2	3.56706	0	0	2	3.56706	0	0	2.1	3.56706	0	0	2.2	3.57524	0	0	1	3.57524	0	0	1.1	3.57524	0	0	1.2	3.56068
	3.54506	0	0	4	3.54506	0	0	4.1	3.54506	0	0	4.2	3.56756	0	0	3	3.56756	0	0	3.1	3.56756	0	0	3.2	3.56855	0	0	2	3.56855	0	0	2.1	3.56855	0	0	2.2	3.57645	0	0	1	3.57645	0	0	1.1	3.57645	0	0	1.2	3.56189
	3.54626	0	0	4	3.54626	0	0	4.1	3.54626	12986.9	0.00010798	4.20011	3.56881	0	0	3	3.56881	0	0	3.1	3.56881	0	0	3.2	3.57003	0	0	2	3.57003	0	0	2.1	3.57003	0	0	2.2	3.58096	0	0	1	3.58096	0	0	1.1	3.58096	0	0	1.2	3.5664
	3.55077	0	0	4	3.55077	0	0	4.1	3.55077	0	0	4.2	3.5703	0	0	3	3.5703	0	0	3.1	3.5703	0	0	3.2	3.57124	0	0	2	3.57124	0	0	2.1	3.57124	0	0	2.2	3.58244	0	0	1	3.58244	0	0	1.1	3.58244	0	0	1.2	3.56788
	3.55211	0	0	4	3.55211	0	0	4.1	3.55211	0	0	4.2	3.5715	0	0	3	3.5715	0	0	3.1	3.5715	0	0	3.2	3.57575	0	0	2	3.57575	0	0	2.1	3.57575	0	0	2.2	3.58365	0	0	1	3.58365	0	0	1.1	3.58365	0	0	1.2	3.56937
	3.55331	0	0	4	3.55331	0	0	4.1	3.55331	0	0	4.2	3.57601	0	0	3	3.57601	0	0	3.1	3.57601	0	0	3.2	3.57723	0	0	2	3.57723	0	0	2.1	3.57723	0	0	2.2	3.58839	0	0	1	3.58839	0	0	1.1	3.58839	0	0	1.2	3.57057
	3.55782	0	0	4	3.55782	0	0	4.1	3.55782	0	0	4.2	3.57741	0	0	3	3.57741	0	0	3.1	3.57741	0	0	3.2	3.57872	0	0	2	3.57872	0	0	2.1	3.57872	0	0	2.2	3.59011	0	0	1	3.59011	0	0	1.1	3.59011	0	0	1.2	3.57508
	3.55918	0	0	4	3.55918	0	0	4.1	3.55918	0	0	4.2	3.5789	0	0	3	3.5789	0	0	3.1	3.5789	0	0	3.2	3.57992	0	0	2	3.57992	0	0	2.1	3.57992	0	0	2.2	3.59462	0	0	1	3.59462	0	0	1.1	3.59462	0	0	1.2	3.57657
	3.56067	0	0	4	3.56067	0	0	4.1	3.56067	0	0	4.2	3.5801	0	0	3	3.5801	0	0	3.1	3.5801	0	0	3.2	3.58443	0	0	2	3.58443	0	0	2.1	3.58443	0	0	2.2	3.59611	0	0	1	3.59611	0	0	1.1	3.59611	0	0	1.2	3.57806
	3.56188	0	0	4	3.56188	0	0	4.1	3.56188	0	0	4.2	3.58461	0	0	3	3.58461	0	0	3.1	3.58461	0	0	3.2	3.58625	0	0	2	3.58625	0	0	2.1	3.58625	0	0	2.2	3.59759	0	0	1	3.59759	0	0	1.1	3.59759	0	0	1.2	3.57926
	3.56639	0	0	4	3.56639	0	0	4.1	3.56639	0	0	4.2	3.5861	0	0	3	3.5861	0	0	3.1	3.5861	0	0	3.2	3.59075	0	0	2	3.59075	0	0	2.1	3.59075	0	0	2.2	3.5988	0	0	1	3.5988	0	0	1.1	3.5988	0	0	1.2	3.58377
	3.56787	0	0	4	3.56787	0	0	4.1	3.56787	0	0	4.2	3.58758	0	0	3	3.58758	0	0	3.1	3.58758	0	0	3.2	3.59224	0	0	2	3.59224	0	0	2.1	3.59224	0	0	2.2	3.60331	0	0	1	3.60331	0	0	1.1	3.60331	0	0	1.2	3.58526
	3.56908	0	0	4	3.56908	0	0	4.1	3.56908	0	0	4.2	3.58879	0	0	3	3.58879	0	0	3.1	3.58879	10301.3	8.56498e-05	3.20009	3.5935	0	0	2	3.5935	0	0	2.1	3.5935	0	0	2.2	3.60592	0	0	1	3.60592	0	0	1.1	3.60592	0	0	1.2	3.58676
	3.57359	0	0	4	3.57359	0	0	4.1	3.57359	0	0	4.2	3.5933	0	0	3	3.5933	0	0	3.1	3.5933	0	0	3.2	3.5947	0	0	2	3.5947	0	0	2.1	3.5947	0	0	2.2	3.60741	0	0	1	3.60741	0	0	1.1	3.60741	0	0	1.2	3.58796
	3.57507	0	0	4	3.57507	0	0	4.1	3.57507	0	0	4.2	3.59478	0	0	3	3.59478	0	0	3.1	3.59478	0	0	3.2	3.59944	0	0	2	3.59944	0	0	2.1	3.59944	0	0	2.2	3.60861	0	0	1	3.60861	0	0	1.1	3.60861	0	0	1.2	3.59247
	3.57628	0	0	4	3.57628	0	0	4.1	3.57628	0	0	4.2	3.59627	0	0	3	3.59627	0	0	3.1	3.59627	0	0	3.2	3.60092	0	0	2	3.60092	0	0	2.1	3.60092	0	0	2.2	3.61312	0	0	1	3.61312	0	0	1.1	3.61312	0	0	1.2	3.59373
	3.58079	0	0	4	3.58079	0	0	4.1	3.58079	0	0	4.2	3.59747	0	0	3	3.59747	0	0	3.1	3.59747	0	0	3.2	3.60213	0	0	2	3.60213	0	0	2.1	3.60213	0	0	2.2	3.61461	0	0	1	3.61461	0	0	1.1	3.61461	0	0	1.2	3.59522
	3.58227	0	0	4	3.58227	0	0	4.1	3.58227	0	0	4.2	3.60198	0	0	3	3.60198	0	0	3.1	3.60198	0	0	3.2	3.60664	0	0	2	3.60664	0	0	2.1	3.60664	0	0	2.2	3.61581	0	0	1	3.61581	0	0	1.1	3.61581	0	0	1.2	3.59642
	3.58376	0	0	4	3.58376	0	0	4.1	3.58376	0	0	4.2	3.60347	0	0	3	3.60347	0	0	3.1	3.60347	0	0	3.2	3.60812	0	0	2	3.60812	0	0	2.1	3.60812	0	0	2.2	3.62032	0	0	1	3.62032	0	0	1.1	3.62032	0	0	1.2	3.60093
	3.58496	0	0	4	3.58496	0	0	4.1	3.58496	0	0	4.2	3.60495	0	0	3	3.60495	0	0	3.1	3.60495	0	0	3.2	3.60961	0	0	2	3.60961	0	0	2.1	3.60961	0	0	2.2	3.62181	0	0	1	3.62181	0	0	1.1	3.62181	0	0	1.2	3.60242
	3.5897	0	0	4	3.5897	0	0	4.1	3.5897	0	0	4.2	3.60616	0	0	3	3.60616	0	0	3.1	3.60616	0	0	3.2	3.61081	0	0	2	3.61081	0	0	2.1	3.61081	0	0	2.2	3.62301	0	0	1	3.62301	0	0	1.1	3.62301	0	0	1.2	3.6039
	3.59142	0	0	4	3.59142	0	0	4.1	3.59142	0	0	4.2	3.61067	0	0	3	3.61067	0	0	3.1	3.61067	0	0	3.2	3.61555	0	0	2	3.61555	0	0	2.1	3.61555	0	0	2.2	3.62776	0	0	1	3.62776	0	0	1.1	3.62776	0	0	1.2	3.60511
	3.59605	0	0	4	3.59605	0	0	4.1	3.59605	0	0	4.2	3.61215	0	0	3	3.61215	0	0	3.1	3.61215	0	0	3.2	3.61704	0	0	2	3.61704	0	0	2.1	3.61704	0	0	2.2	3.62925	0	0	1	3.62925	0	0	1.1	3.62925	0	0	1.2	3.60962
	3.59753	0	0	4	3.59753	0	0	4.1	3.59753	0	0	4.2	3.61364	0	0	3	3.61364	0	0	3.1	3.61364	0	0	3.2	3.61824	0	0	2	3.61824	0	0	2.1	3.61824	0	0	2.2	3.63074	0	0	1	3.63074	0	0	1.1	3.63074	0	0	1.2	3.6111
	3.59902	0	0	4	3.59902	0	0	4.1	3.59902	0	0	4.2	3.61485	0	0	3	3.61485	0	0	3.1	3.61485	0	0	3.2	3.62275	0	0	2	3.62275	0	0	2.1	3.62275	0	0	2.2	3.63291	0	0	1	3.63291	0	0	1.1	3.63291	0	0	1.2	3.61259
	3.60022	0	0	4	3.60022	0	0	4.1	3.60022	0	0	4.2	3.61935	0	0	3	3.61935	0	0	3.1	3.61935	0	0	3.2	3.62424	0	0	2	3.62424	0	0	2.1	3.62424	0	0	2.2	3.63742	0	0	1	3.63742	0	0	1.1	3.63742	0	0	1.2	3.6138
	3.60496	0	0	4	3.60496	0	0	4.1	3.60496	0	0	4.2	3.62084	0	0	3	3.62084	0	0	3.1	3.62084	0	0	3.2	3.62572	0	0	2	3.62572	0	0	2.1	3.62572	0	0	2.2	3.63937	0	0	1	3.63937	0	0	1.1	3.63937	0	0	1.2	3.6183
	3.60645	0	0	4	3.60645	0	0	4.1	3.60645	0	0	4.2	3.62218	0	0	3	3.62218	0	0	3.1	3.62218	0	0	3.2	3.62693	0	0	2	3.62693	0	0	2.1	3.62693	0	0	2.2	3.64388	0	0	1	3.64388	0	0	1.1	3.64388	0	0	1.2	3.61956
	3.60793	0	0	4	3.60793	0	0	4.1	3.60793	0	0	4.2	3.62338	0	0	3	3.62338	0	0	3.1	3.62338	0	0	3.2	3.63144	0	0	2	3.63144	0	0	2.1	3.63144	0	0	2.2	3.64537	0	0	1	3.64537	0	0	1.1	3.64537	0	0	1.2	3.62105
	3.61009	0	0	4	3.61009	0	0	4.1	3.61009	0	0	4.2	3.62812	0	0	3	3.62812	0	0	3.1	3.62812	0	0	3.2	3.63292	0	0	2	3.63292	0	0	2.1	3.63292	0	0	2.2	3.64685	0	0	1	3.64685	0	0	1.1	3.64685	0	0	1.2	3.62225
	3.61482	0	0	4	3.61482	0	0	4.1	3.61482	0	0	4.2	3.62961	0	0	3	3.62961	0	0	3.1	3.62961	0	0	3.2	3.63413	0	0	2	3.63413	0	0	2.1	3.63413	0	0	2.2	3.64806	0	0	1	3.64806	0	0	1.1	3.64806	14390.9	0.000119653	1.20012	3.62676
	3.61631	0	0	4	3.61631	0	0	4.1	3.61631	0	0	4.2	3.63081	0	0	3	3.63081	0	0	3.1	3.63081	0	0	3.2	3.63864	0	0	2	3.63864	0	0	2.1	3.63864	0	0	2.2	3.65257	0	0	1	3.65257	0	0	1.1	3.65257	0	0	1.2	3.62825
	3.61779	0	0	4	3.61779	0	0	4.1	3.61779	0	0	4.2	3.63555	0	0	3	3.63555	0	0	3.1	3.63555	0	0	3.2	3.64013	0	0	2	3.64013	0	0	2.1	3.64013	0	0	2.2	3.65406	0	0	1	3.65406	0	0	1.1	3.65406	0	0	1.2	3.62973
	3.61994	0	0	4	3.61994	0	0	4.1	3.61994	0	0	4.2	3.63703	0	0	3	3.63703	0	0	3.1	3.63703	0	0	3.2	3.64161	0	0	2	3.64161	0	0	2.1	3.64161	0	0	2.2	3.65526	0	0	1	3.65526	0	0	1.1	3.65526	0	0	1.2	3.63094
	3.62445	0	0	4	3.62445	0	0	4.1	3.62445	0	0	4.2	3.63852	0	0	3	3.63852	0	0	3.1	3.63852	0	0	3.2	3.64282	0	0	2	3.64282	0	0	2.1	3.64282	0	0	2.2	3.65977	0	0	1	3.65977	0	0	1.1	3.65977	0	0	1.2	3.63545
	3.62593	0	0	4	3.62593	0	0	4.1	3.62593	0	0	4.2	3.64066	0	0	3	3.64066	0	0	3.1	3.64066	21895.6	0.000182051	3.20018	3.64733	0	0	2	3.64733	0	0	2.1	3.64733	0	0	2.2	3.66126	0	0	1	3.66126	0	0	1.1	3.66126	0	0	1.2	3.63693
	3.62742	0	0	4	3.62742	0	0	4.1	3.62742	0	0	4.2	3.64517	0	0	3	3.64517	0	0	3.1	3.64517	0	0	3.2	3.64881	0	0	2	3.64881	0	0	2.1	3.64881	0	0	2.2	3.66274	0	0	1	3.66274	0	0	1.1	3.66274	0	0	1.2	3.63842
	3.62862	0	0	4	3.62862	0	0	4.1	3.62862	0	0	4.2	3.64666	0	0	3	3.64666	0	0	3.1	3.64666	0	0	3.2	3.65002	0	0	2	3.65002	0	0	2.1	3.65002	0	0	2.2	3.66395	0	0	1	3.66395	0	0	1.1	3.66395	0	0	1.2	3.64054
	3.63313	0	0	4	3.63313	0	0	4.1	3.63313	0	0	4.2	3.64786	0	0	3	3.64786	0	0	3.1	3.64786	0	0	3.2	3.65476	0	0	2	3.65476	0	0	2.1	3.65476	0	0	2.2	3.66868	0	0	1	3.66868	0	0	1.1	3.66868	0	0	1.2	3.64528
	3.63462	0	0	4	3.63462	0	0	4.1	3.63462	0	0	4.2	3.65237	0	0	3	3.65237	0	0	3.1	3.65237	0	0	3.2	3.65609	0	0	2	3.65609	0	0	2.1	3.65609	0	0	2.2	3.67017	0	0	1	3.67017	0	0	1.1	3.67017	0	0	1.2	3.64678
	3.63611	0	0	4	3.63611	0	0	4.1	3.63611	0	0	4.2	3.65386	0	0	3	3.65386	0	0	3.1	3.65386	0	0	3.2	3.65757	0	0	2	3.65757	0	0	2.1	3.65757	0	0	2.2	3.67137	0	0	1	3.67137	0	0	1.1	3.67137	0	0	1.2	3.64827
	3.63731	0	0	4	3.63731	0	0	4.1	3.63731	0	0	4.2	3.65506	0	0	3	3.65506	0	0	3.1	3.65506	0	0	3.2	3.65974	0	0	2	3.65974	0	0	2.1	3.65974	0	0	2.2	3.67607	0	0	1	3.67607	0	0	1.1	3.67607	0	0	1.2	3.65039
	3.64205	0	0	4	3.64205	0	0	4.1	3.64205	0	0	4.2	3.65957	0	0	3	3.65957	0	0	3.1	3.65957	0	0	3.2	3.66425	0	0	2	3.66425	0	0	2.1	3.66425	0	0	2.2	3.67756	0	0	1	3.67756	0	0	1.1	3.67756	0	0	1.2	3.6549
	3.64376	0	0	4	3.64376	0	0	4.1	3.64376	0	0	4.2	3.66106	0	0	3	3.66106	0	0	3.1	3.66106	0	0	3.2	3.66574	0	0	2	3.66574	0	0	2.1	3.66574	0	0	2.2	3.67891	0	0	1	3.67891	0	0	1.1	3.67891	0	0	1.2	3.65638
	3.64827	0	0	4	3.64827	0	0	4.1	3.64827	0	0	4.2	3.66254	0	0	3	3.66254	0	0	3.1	3.66254	0	0	3.2	3.66722	0	0	2	3.66722	0	0	2.1	3.66722	0	0	2.2	3.68011	0	0	1	3.68011	0	0	1.1	3.68011	0	0	1.2	3.65759
	3.64976	0	0	4	3.64976	0	0	4.1	3.64976	0	0	4.2	3.66375	0	0	3	3.66375	0	0	3.1	3.66375	0	0	3.2	3.66843	0	0	2	3.66843	0	0	2.1	3.66843	0	0	2.2	3.68462	0	0	1	3.68462	0	0	1.1	3.68462	0	0	1.2	3.6621
	3.65125	0	0	4	3.65125	0	0	4.1	3.65125	0	0	4.2	3.66826	0	0	3	3.66826	0	0	3.1	3.66826	0	0	3.2	3.67294	0	0	2	3.67294	0	0	2.1	3.67294	0	0	2.2	3.68593	0	0	1	3.68593	0	0	1.1	3.68593	0	0	1.2	3.66358
	3.65245	0	0	4	3.65245	0	0	4.1	3.65245	0	0	4.2	3.66967	0	0	3	3.66967	0	0	3.1	3.66967	0	0	3.2	3.67442	0	0	2	3.67442	0	0	2.1	3.67442	0	0	2.2	3.68741	0	0	1	3.68741	0	0	1.1	3.68741	0	0	1.2	3.66501
	3.65696	0	0	4	3.65696	0	0	4.1	3.65696	0	0	4.2	3.67116	0	0	3	3.67116	0	0	3.1	3.67116	0	0	3.2	3.67591	0	0	2	3.67591	0	0	2.1	3.67591	0	0	2.2	3.68862	0	0	1	3.68862	0	0	1.1	3.68862	0	0	1.2	3.66622
	3.65845	0	0	4	3.65845	0	0	4.1	3.65845	0	0	4.2	3.67236	0	0	3	3.67236	0	0	3.1	3.67236	0	0	3.2	3.67711	0	0	2	3.67711	0	0	2.1	3.67711	0	0	2.2	3.69313	0	0	1	3.69313	0	0	1.1	3.69313	0	0	1.2	3.67073
	3.65993	0	0	4	3.65993	0	0	4.1	3.65993	0	0	4.2	3.67698	0	0	3	3.67698	0	0	3.1	3.67698	0	0	3.2	3.68374	0	0	2	3.68374	0	0	2.1	3.68374	0	0	2.2	3.69461	0	0	1	3.69461	0	0	1.1	3.69461	0	0	1.2	3.67221
	3.66114	0	0	4	3.66114	0	0	4.1	3.66114	0	0	4.2	3.67835	0	0	3	3.67835	0	0	3.1	3.67835	0	0	3.2	3.68522	0	0	2	3.68522	0	0	2.1	3.68522	0	0	2.2	3.6961	0	0	1	3.6961	0	0	1.1	3.6961	0	0	1.2	3.67342
	3.66564	0	0	4	3.66564	0	0	4.1	3.66564	0	0	4.2	3.67956	0	0	3	3.67956	0	0	3.1	3.67956	0	0	3.2	3.68671	0	0	2	3.68671	0	0	2.1	3.68671	0	0	2.2	3.6973	0	0	1	3.6973	0	0	1.1	3.6973	0	0	1.2	3.67793
	3.66713	0	0	4	3.66713	0	0	4.1	3.66713	0	0	4.2	3.68407	0	0	3	3.68407	0	0	3.1	3.68407	0	0	3.2	3.68791	0	0	2	3.68791	0	0	2.1	3.68791	0	0	2.2	3.70181	0	0	1	3.70181	0	0	1.1	3.70181	0	0	1.2	3.67942
	3.66861	0	0	4	3.66861	0	0	4.1	3.66861	0	0	4.2	3.68555	0	0	3	3.68555	0	0	3.1	3.68555	0	0	3.2	3.69242	0	0	2	3.69242	0	0	2.1	3.69242	0	0	2.2	3.7033	0	0	1	3.7033	0	0	1.1	3.7033	0	0	1.2	3.6809
	3.66982	0	0	4	3.66982	0	0	4.1	3.66982	0	0	4.2	3.68704	0	0	3	3.68704	0	0	3.1	3.68704	0	0	3.2	3.69391	0	0	2	3.69391	0	0	2.1	3.69391	0	0	2.2	3.7045	0	0	1	3.7045	0	0	1.1	3.7045	0	0	1.2	3.68211
	3.67433	0	0	4	3.67433	0	0	4.1	3.67433	0	0	4.2	3.68824	0	0	3	3.68824	0	0	3.1	3.68824	0	0	3.2	3.69511	0	0	2	3.69511	0	0	2.1	3.69511	0	0	2.2	3.70901	0	0	1	3.70901	0	0	1.1	3.70901	0	0	1.2	3.68685
	3.67581	0	0	4	3.67581	0	0	4.1	3.67581	0	0	4.2	3.69275	0	0	3	3.69275	0	0	3.1	3.69275	0	0	3.2	3.69962	0	0	2	3.69962	0	0	2.1	3.69962	0	0	2.2	3.7105	0	0	1	3.7105	0	0	1.1	3.7105	0	0	1.2	3.68833
	3.6773	0	0	4	3.6773	0	0	4.1	3.6773	0	0	4.2	3.69537	0	0	3	3.69537	0	0	3.1	3.69537	0	0	3.2	3.70111	0	0	2	3.70111	0	0	2.1	3.70111	0	0	2.2	3.71198	0	0	1	3.71198	0	0	1.1	3.71198	0	0	1.2	3.68982
	3.6785	0	0	4	3.6785	0	0	4.1	3.6785	0	0	4.2	3.69685	0	0	3	3.69685	0	0	3.1	3.69685	0	0	3.2	3.70248	0	0	2	3.70248	0	0	2.1	3.70248	0	0	2.2	3.71319	0	0	1	3.71319	0	0	1.1	3.71319	0	0	1.2	3.69194
	3.68301	0	0	4	3.68301	0	0	4.1	3.68301	0	0	4.2	3.69806	0	0	3	3.69806	0	0	3.1	3.69806	0	0	3.2	3.70368	0	0	2	3.70368	0	0	2.1	3.70368	0	0	2.2	3.7177	0	0	1	3.7177	0	0	1.1	3.7177	0	0	1.2	3.69645
	3.68432	0	0	4	3.68432	0	0	4.1	3.68432	0	0	4.2	3.70257	0	0	3	3.70257	0	0	3.1	3.70257	0	0	3.2	3.70819	0	0	2	3.70819	0	0	2.1	3.70819	0	0	2.2	3.71918	0	0	1	3.71918	0	0	1.1	3.71918	0	0	1.2	3.69793
	3.6858	0	0	4	3.6858	0	0	4.1	3.6858	0	0	4.2	3.70407	0	0	3	3.70407	0	0	3.1	3.70407	0	0	3.2	3.70968	0	0	2	3.70968	0	0	2.1	3.70968	0	0	2.2	3.72039	0	0	1	3.72039	0	0	1.1	3.72039	0	0	1.2	3.69941
	3.68701	0	0	4	3.68701	0	0	4.1	3.68701	0	0	4.2	3.70527	0	0	3	3.70527	0	0	3.1	3.70527	0	0	3.2	3.71116	0	0	2	3.71116	0	0	2.1	3.71116	0	0	2.2	3.7249	0	0	1	3.7249	0	0	1.1	3.7249	0	0	1.2	3.70062
	3.69152	0	0	4	3.69152	0	0	4.1	3.69152	0	0	4.2	3.70978	0	0	3	3.70978	0	0	3.1	3.70978	0	0	3.2	3.71237	0	0	2	3.71237	0	0	2.1	3.71237	0	0	2.2	3.72615	0	0	1	3.72615	0	0	1.1	3.72615	0	0	1.2	3.70513
	3.693	0	0	4	3.693	0	0	4.1	3.693	0	0	4.2	3.71127	0	0	3	3.71127	0	0	3.1	3.71127	0	0	3.2	3.71688	0	0	2	3.71688	0	0	2.1	3.71688	0	0	2.2	3.72741	0	0	1	3.72741	0	0	1.1	3.72741	0	0	1.2	3.70661
	3.69431	0	0	4	3.69431	0	0	4.1	3.69431	0	0	4.2	3.71275	0	0	3	3.71275	0	0	3.1	3.71275	0	0	3.2	3.71836	0	0	2	3.71836	0	0	2.1	3.71836	0	0	2.2	3.72861	0	0	1	3.72861	0	0	1.1	3.72861	0	0	1.2	3.70812
	3.69551	0	0	4	3.69551	0	0	4.1	3.69551	0	0	4.2	3.71396	0	0	3	3.71396	0	0	3.1	3.71396	0	0	3.2	3.71985	0	0	2	3.71985	0	0	2.1	3.71985	0	0	2.2	3.73335	0	0	1	3.73335	0	0	1.1	3.73335	0	0	1.2	3.70932
	3.70002	0	0	4	3.70002	0	0	4.1	3.70002	0	0	4.2	3.71847	0	0	3	3.71847	0	0	3.1	3.71847	0	0	3.2	3.72201	0	0	2	3.72201	0	0	2.1	3.72201	0	0	2.2	3.73484	0	0	1	3.73484	0	0	1.1	3.73484	0	0	1.2	3.71383
	3.70128	0	0	4	3.70128	0	0	4.1	3.70128	0	0	4.2	3.71995	0	0	3	3.71995	0	0	3.1	3.71995	0	0	3.2	3.72652	0	0	2	3.72652	0	0	2.1	3.72652	0	0	2.2	3.73604	0	0	1	3.73604	0	0	1.1	3.73604	0	0	1.2	3.71532
	3.70276	0	0	4	3.70276	0	0	4.1	3.70276	0	0	4.2	3.72144	0	0	3	3.72144	0	0	3.1	3.72144	0	0	3.2	3.72802	0	0	2	3.72802	0	0	2.1	3.72802	0	0	2.2	3.74055	0	0	1	3.74055	0	0	1.1	3.74055	0	0	1.2	3.7168
	3.70397	0	0	4	3.70397	0	0	4.1	3.70397	0	0	4.2	3.72264	0	0	3	3.72264	0	0	3.1	3.72264	0	0	3.2	3.72951	0	0	2	3.72951	0	0	2.1	3.72951	0	0	2.2	3.74204	0	0	1	3.74204	0	0	1.1	3.74204	0	0	1.2	3.71801
	3.70848	0	0	4	3.70848	0	0	4.1	3.70848	0	0	4.2	3.72715	0	0	3	3.72715	0	0	3.1	3.72715	0	0	3.2	3.73071	0	0	2	3.73071	0	0	2.1	3.73071	0	0	2.2	3.74352	0	0	1	3.74352	0	0	1.1	3.74352	0	0	1.2	3.72251
	3.7098	0	0	4	3.7098	0	0	4.1	3.7098	0	0	4.2	3.72864	0	0	3	3.72864	0	0	3.1	3.72864	0	0	3.2	3.73522	0	0	2	3.73522	0	0	2.1	3.73522	0	0	2.2	3.74473	0	0	1	3.74473	0	0	1.1	3.74473	0	0	1.2	3.72377
	3.71129	0	0	4	3.71129	0	0	4.1	3.71129	0	0	4.2	3.72984	0	0	3	3.72984	0	0	3.1	3.72984	0	0	3.2	3.73671	0	0	2	3.73671	0	0	2.1	3.73671	0	0	2.2	3.74924	0	0	1	3.74924	0	0	1.1	3.74924	0	0	1.2	3.72505
	3.71249	0	0	4	3.71249	0	0	4.1	3.71249	0	0	4.2	3.73435	0	0	3	3.73435	0	0	3.1	3.73435	0	0	3.2	3.7382	0	0	2	3.7382	0	0	2.1	3.7382	0	0	2.2	3.7512	0	0	1	3.7512	0	0	1.1	3.7512	0	0	1.2	3.72626
	3.717	0	0	4	3.717	0	0	4.1	3.717	0	0	4.2	3.73573	0	0	3	3.73573	0	0	3.1	3.73573	0	0	3.2	3.7394	0	0	2	3.7394	0	0	2.1	3.7394	0	0	2.2	3.75571	0	0	1	3.75571	0	0	1.1	3.75571	0	0	1.2	3.73077
	3.71828	0	0	4	3.71828	0	0	4.1	3.71828	0	0	4.2	3.73693	0	0	3	3.73693	0	0	3.1	3.73693	0	0	3.2	3.74391	0	0	2	3.74391	0	0	2.1	3.74391	0	0	2.2	3.75834	0	0	1	3.75834	0	0	1.1	3.75834	0	0	1.2	3.73225
	3.71977	0	0	4	3.71977	0	0	4.1	3.71977	0	0	4.2	3.74144	0	0	3	3.74144	0	0	3.1	3.74144	0	0	3.2	3.7454	0	0	2	3.7454	0	0	2.1	3.7454	0	0	2.2	3.75955	0	0	1	3.75955	0	0	1.1	3.75955	0	0	1.2	3.73374
	3.72097	0	0	4	3.72097	0	0	4.1	3.72097	0	0	4.2	3.7427	0	0	3	3.7427	0	0	3.1	3.7427	0	0	3.2	3.7466	0	0	2	3.7466	0	0	2.1	3.7466	0	0	2.2	3.7641	0	0	1	3.7641	0	0	1.1	3.7641	0	0	1.2	3.73494
	3.72549	0	0	4	3.72549	0	0	4.1	3.72549	0	0	4.2	3.74418	0	0	3	3.74418	0	0	3.1	3.74418	0	0	3.2	3.75111	0	0	2	3.75111	0	0	2.1	3.75111	0	0	2.2	3.76604	0	0	1	3.76604	0	0	1.1	3.76604	0	0	1.2	3.73945
	3.72697	0	0	4	3.72697	0	0	4.1	3.72697	0	0	4.2	3.74539	0	0	3	3.74539	0	0	3.1	3.74539	0	0	3.2	3.75236	0	0	2	3.75236	0	0	2.1	3.75236	0	0	2.2	3.77055	0	0	1	3.77055	0	0	1.1	3.77055	0	0	1.2	3.74094
	3.72846	0	0	4	3.72846	0	0	4.1	3.72846	0	0	4.2	3.7499	0	0	3	3.7499	0	0	3.1	3.7499	0	0	3.2	3.75385	0	0	2	3.75385	0	0	2.1	3.75385	0	0	2.2	3.77203	0	0	1	3.77203	0	0	1.1	3.77203	0	0	1.2	3.74243
	3.72966	0	0	4	3.72966	0	0	4.1	3.72966	0	0	4.2	3.7511	0	0	3	3.7511	0	0	3.1	3.7511	0	0	3.2	3.75506	0	0	2	3.75506	0	0	2.1	3.75506	10164.1	8.45097e-05	2.20008	3.77329	0	0	1	3.77329	0	0	1.1	3.77329	0	0	1.2	3.74363
	3.73417	0	0	4	3.73417	0	0	4.1	3.73417	0	0	4.2	3.75561	0	0	3	3.75561	0	0	3.1	3.75561	0	0	3.2	3.75956	0	0	2	3.75956	0	0	2.1	3.75956	0	0	2.2	3.77449	0	0	1	3.77449	0	0	1.1	3.77449	0	0	1.2	3.74814
	3.73543	0	0	4	3.73543	0	0	4.1	3.73543	0	0	4.2	3.7571	0	0	3	3.7571	0	0	3.1	3.7571	0	0	3.2	3.76105	0	0	2	3.76105	0	0	2.1	3.76105	0	0	2.2	3.779	0	0	1	3.779	0	0	1.1	3.779	0	0	1.2	3.74963
	3.73691	0	0	4	3.73691	0	0	4.1	3.73691	0	0	4.2	3.75858	0	0	3	3.75858	0	0	3.1	3.75858	0	0	3.2	3.76253	0	0	2	3.76253	0	0	2.1	3.76253	0	0	2.2	3.78049	0	0	1	3.78049	0	0	1.1	3.78049	0	0	1.2	3.75111
	3.73812	0	0	4	3.73812	0	0	4.1	3.73812	0	0	4.2	3.75979	0	0	3	3.75979	0	0	3.1	3.75979	0	0	3.2	3.76374	0	0	2	3.76374	0	0	2.1	3.76374	0	0	2.2	3.78197	0	0	1	3.78197	0	0	1.1	3.78197	0	0	1.2	3.75232
	3.74285	0	0	4	3.74285	0	0	4.1	3.74285	0	0	4.2	3.7643	0	0	3	3.7643	0	0	3.1	3.7643	0	0	3.2	3.76848	0	0	2	3.76848	0	0	2.1	3.76848	0	0	2.2	3.78318	0	0	1	3.78318	0	0	1.1	3.78318	0	0	1.2	3.75683
	3.74434	0	0	4	3.74434	0	0	4.1	3.74434	0	0	4.2	3.76561	0	0	3	3.76561	0	0	3.1	3.76561	0	0	3.2	3.76996	0	0	2	3.76996	0	0	2.1	3.76996	0	0	2.2	3.78792	0	0	1	3.78792	0	0	1.1	3.78792	0	0	1.2	3.75808
	3.74582	0	0	4	3.74582	0	0	4.1	3.74582	0	0	4.2	3.76709	0	0	3	3.76709	0	0	3.1	3.76709	0	0	3.2	3.77145	0	0	2	3.77145	0	0	2.1	3.77145	0	0	2.2	3.78941	0	0	1	3.78941	0	0	1.1	3.78941	0	0	1.2	3.75957
	3.74797	0	0	4	3.74797	0	0	4.1	3.74797	0	0	4.2	3.7683	0	0	3	3.7683	0	0	3.1	3.7683	0	0	3.2	3.77362	0	0	2	3.77362	0	0	2.1	3.77362	0	0	2.2	3.79089	0	0	1	3.79089	0	0	1.1	3.79089	0	0	1.2	3.76077
	3.75248	0	0	4	3.75248	0	0	4.1	3.75248	0	0	4.2	3.77281	0	0	3	3.77281	0	0	3.1	3.77281	0	0	3.2	3.77813	0	0	2	3.77813	0	0	2.1	3.77813	0	0	2.2	3.79306	0	0	1	3.79306	0	0	1.1	3.79306	0	0	1.2	3.76528
	3.75396	0	0	4	3.75396	0	0	4.1	3.75396	0	0	4.2	3.77429	0	0	3	3.77429	0	0	3.1	3.77429	0	0	3.2	3.77961	0	0	2	3.77961	0	0	2.1	3.77961	0	0	2.2	3.79756	0	0	1	3.79756	0	0	1.1	3.79756	0	0	1.2	3.76678
	3.75545	0	0	4	3.75545	0	0	4.1	3.75545	0	0	4.2	3.77578	0	0	3	3.77578	0	0	3.1	3.77578	0	0	3.2	3.7811	0	0	2	3.7811	0	0	2.1	3.7811	0	0	2.2	3.79905	0	0	1	3.79905	0	0	1.1	3.79905	0	0	1.2	3.76799
	3.75665	0	0	4	3.75665	0	0	4.1	3.75665	0	0	4.2	3.77698	0	0	3	3.77698	0	0	3.1	3.77698	0	0	3.2	3.7823	0	0	2	3.7823	0	0	2.1	3.7823	0	0	2.2	3.80026	0	0	1	3.80026	0	0	1.1	3.80026	0	0	1.2	3.7725
	3.76127	0	0	4	3.76127	0	0	4.1	3.76127	0	0	4.2	3.78172	0	0	3	3.78172	0	0	3.1	3.78172	0	0	3.2	3.78681	0	0	2	3.78681	0	0	2.1	3.78681	0	0	2.2	3.80477	0	0	1	3.80477	0	0	1.1	3.80477	0	0	1.2	3.77398
	3.76276	0	0	4	3.76276	0	0	4.1	3.76276	0	0	4.2	3.78321	0	0	3	3.78321	0	0	3.1	3.78321	0	0	3.2	3.7883	0	0	2	3.7883	0	0	2.1	3.7883	0	0	2.2	3.80625	0	0	1	3.80625	0	0	1.1	3.80625	0	0	1.2	3.77547
	3.76423	0	0	4	3.76423	0	0	4.1	3.76423	0	0	4.2	3.78442	0	0	3	3.78442	0	0	3.1	3.78442	0	0	3.2	3.78978	0	0	2	3.78978	0	0	2.1	3.78978	0	0	2.2	3.80774	0	0	1	3.80774	0	0	1.1	3.80774	0	0	1.2	3.77667
	3.76544	0	0	4	3.76544	0	0	4.1	3.76544	0	0	4.2	3.78915	0	0	3	3.78915	0	0	3.1	3.78915	0	0	3.2	3.79099	0	0	2	3.79099	0	0	2.1	3.79099	0	0	2.2	3.80895	0	0	1	3.80895	0	0	1.1	3.80895	0	0	1.2	3.78118
	3.77018	0	0	4	3.77018	0	0	4.1	3.77018	0	0	4.2	3.79064	0	0	3	3.79064	0	0	3.1	3.79064	0	0	3.2	3.7955	0	0	2	3.7955	0	0	2.1	3.7955	0	0	2.2	3.81345	0	0	1	3.81345	0	0	1.1	3.81345	0	0	1.2	3.78244
	3.77166	0	0	4	3.77166	0	0	4.1	3.77166	0	0	4.2	3.79212	0	0	3	3.79212	0	0	3.1	3.79212	0	0	3.2	3.79698	0	0	2	3.79698	0	0	2.1	3.79698	0	0	2.2	3.81494	0	0	1	3.81494	0	0	1.1	3.81494	0	0	1.2	3.78392
	3.77287	0	0	4	3.77287	0	0	4.1	3.77287	0	0	4.2	3.79427	0	0	3	3.79427	0	0	3.1	3.79427	0	0	3.2	3.79824	0	0	2	3.79824	0	0	2.1	3.79824	0	0	2.2	3.81615	0	0	1	3.81615	0	0	1.1	3.81615	0	0	1.2	3.78513
	3.77737	0	0	4	3.77737	0	0	4.1	3.77737	0	0	4.2	3.79878	0	0	3	3.79878	0	0	3.1	3.79878	0	0	3.2	3.79945	0	0	2	3.79945	0	0	2.1	3.79945	0	0	2.2	3.82065	0	0	1	3.82065	0	0	1.1	3.82065	0	0	1.2	3.78964
	3.77886	0	0	4	3.77886	0	0	4.1	3.77886	0	0	4.2	3.80027	0	0	3	3.80027	0	0	3.1	3.80027	0	0	3.2	3.80396	0	0	2	3.80396	0	0	2.1	3.80396	0	0	2.2	3.82205	0	0	1	3.82205	0	0	1.1	3.82205	0	0	1.2	3.79112
	3.78007	0	0	4	3.78007	0	0	4.1	3.78007	0	0	4.2	3.80175	0	0	3	3.80175	0	0	3.1	3.80175	0	0	3.2	3.80544	0	0	2	3.80544	0	0	2.1	3.80544	0	0	2.2	3.82354	0	0	1	3.82354	0	0	1.1	3.82354	0	0	1.2	3.79261
	3.7848	0	0	4	3.7848	0	0	4.1	3.7848	0	0	4.2	3.80296	0	0	3	3.80296	0	0	3.1	3.80296	0	0	3.2	3.80693	0	0	2	3.80693	0	0	2.1	3.80693	0	0	2.2	3.82474	0	0	1	3.82474	0	0	1.1	3.82474	0	0	1.2	3.79382
	3.7872	0	0	4	3.7872	0	0	4.1	3.7872	0	0	4.2	3.80746	0	0	3	3.80746	0	0	3.1	3.80746	0	0	3.2	3.80814	0	0	2	3.80814	0	0	2.1	3.80814	0	0	2.2	3.82925	0	0	1	3.82925	0	0	1.1	3.82925	0	0	1.2	3.79856
	3.78868	0	0	4	3.78868	0	0	4.1	3.78868	0	0	4.2	3.80895	0	0	3	3.80895	0	0	3.1	3.80895	0	0	3.2	3.81287	0	0	2	3.81287	0	0	2.1	3.81287	0	0	2.2	3.83074	0	0	1	3.83074	0	0	1.1	3.83074	0	0	1.2	3.80004
	3.79084	0	0	4	3.79084	0	0	4.1	3.79084	0	0	4.2	3.81043	0	0	3	3.81043	0	0	3.1	3.81043	0	0	3.2	3.81417	0	0	2	3.81417	0	0	2.1	3.81417	0	0	2.2	3.83195	0	0	1	3.83195	0	0	1.1	3.83195	0	0	1.2	3.80153
	3.79535	0	0	4	3.79535	0	0	4.1	3.79535	0	0	4.2	3.81164	0	0	3	3.81164	0	0	3.1	3.81164	0	0	3.2	3.81565	0	0	2	3.81565	0	0	2.1	3.81565	0	0	2.2	3.83645	0	0	1	3.83645	0	0	1.1	3.83645	0	0	1.2	3.80366
	3.79679	0	0	4	3.79679	0	0	4.1	3.79679	0	0	4.2	3.81615	0	0	3	3.81615	0	0	3.1	3.81615	0	0	3.2	3.81783	0	0	2	3.81783	0	0	2.1	3.81783	0	0	2.2	3.83795	0	0	1	3.83795	0	0	1.1	3.83795	0	0	1.2	3.8084
	3.79827	0	0	4	3.79827	0	0	4.1	3.79827	0	0	4.2	3.81764	0	0	3	3.81764	0	0	3.1	3.81764	0	0	3.2	3.82234	0	0	2	3.82234	0	0	2.1	3.82234	0	0	2.2	3.83927	0	0	1	3.83927	0	0	1.1	3.83927	0	0	1.2	3.80988
	3.79948	0	0	4	3.79948	0	0	4.1	3.79948	0	0	4.2	3.81912	0	0	3	3.81912	0	0	3.1	3.81912	0	0	3.2	3.82383	0	0	2	3.82383	0	0	2.1	3.82383	0	0	2.2	3.84048	0	0	1	3.84048	0	0	1.1	3.84048	0	0	1.2	3.81109
	3.80399	0	0	4	3.80399	0	0	4.1	3.80399	0	0	4.2	3.82033	0	0	3	3.82033	0	0	3.1	3.82033	0	0	3.2	3.82508	0	0	2	3.82508	0	0	2.1	3.82508	0	0	2.2	3.84499	0	0	1	3.84499	0	0	1.1	3.84499	0	0	1.2	3.8156
	3.80547	0	0	4	3.80547	0	0	4.1	3.80547	0	0	4.2	3.82483	0	0	3	3.82483	0	0	3.1	3.82483	0	0	3.2	3.82629	0	0	2	3.82629	0	0	2.1	3.82629	0	0	2.2	3.84647	0	0	1	3.84647	0	0	1.1	3.84647	0	0	1.2	3.817
	3.80673	0	0	4	3.80673	0	0	4.1	3.80673	0	0	4.2	3.82632	0	0	3	3.82632	0	0	3.1	3.82632	0	0	3.2	3.8308	0	0	2	3.8308	0	0	2.1	3.8308	0	0	2.2	3.84768	0	0	1	3.84768	0	0	1.1	3.84768	0	0	1.2	3.81849
	3.80794	0	0	4	3.80794	0	0	4.1	3.80794	0	0	4.2	3.82781	0	0	3	3.82781	0	0	3.1	3.82781	0	0	3.2	3.83228	0	0	2	3.83228	0	0	2.1	3.83228	0	0	2.2	3.85219	0	0	1	3.85219	0	0	1.1	3.85219	0	0	1.2	3.8197
	3.81245	0	0	4	3.81245	0	0	4.1	3.81245	0	0	4.2	3.82901	0	0	3	3.82901	0	0	3.1	3.82901	0	0	3.2	3.83377	0	0	2	3.83377	0	0	2.1	3.83377	0	0	2.2	3.85367	0	0	1	3.85367	0	0	1.1	3.85367	0	0	1.2	3.8242
	3.81393	0	0	4	3.81393	0	0	4.1	3.81393	0	0	4.2	3.83352	0	0	3	3.83352	0	0	3.1	3.83352	0	0	3.2	3.83497	0	0	2	3.83497	0	0	2.1	3.83497	0	0	2.2	3.85488	0	0	1	3.85488	0	0	1.1	3.85488	0	0	1.2	3.82569
	3.81542	0	0	4	3.81542	0	0	4.1	3.81542	0	0	4.2	3.83481	0	0	3	3.83481	0	0	3.1	3.83481	0	0	3.2	3.83948	0	0	2	3.83948	0	0	2.1	3.83948	0	0	2.2	3.85939	0	0	1	3.85939	0	0	1.1	3.85939	0	0	1.2	3.82717
	3.81662	0	0	4	3.81662	0	0	4.1	3.81662	0	0	4.2	3.8363	0	0	3	3.8363	0	0	3.1	3.8363	0	0	3.2	3.84095	0	0	2	3.84095	0	0	2.1	3.84095	0	0	2.2	3.86087	0	0	1	3.86087	0	0	1.1	3.86087	0	0	1.2	3.82838
	3.82113	0	0	4	3.82113	0	0	4.1	3.82113	0	0	4.2	3.8375	0	0	3	3.8375	0	0	3.1	3.8375	0	0	3.2	3.84244	0	0	2	3.84244	0	0	2.1	3.84244	0	0	2.2	3.86208	0	0	1	3.86208	0	0	1.1	3.86208	0	0	1.2	3.83289
	3.82261	0	0	4	3.82261	0	0	4.1	3.82261	0	0	4.2	3.84201	0	0	3	3.84201	0	0	3.1	3.84201	0	0	3.2	3.84364	0	0	2	3.84364	0	0	2.1	3.84364	0	0	2.2	3.86659	0	0	1	3.86659	0	0	1.1	3.86659	0	0	1.2	3.83409
	3.82382	0	0	4	3.82382	0	0	4.1	3.82382	0	0	4.2	3.84334	0	0	3	3.84334	0	0	3.1	3.84334	0	0	3.2	3.84815	0	0	2	3.84815	0	0	2.1	3.84815	0	0	2.2	3.86807	0	0	1	3.86807	0	0	1.1	3.86807	0	0	1.2	3.8386
	3.82833	0	0	4	3.82833	0	0	4.1	3.82833	0	0	4.2	3.84482	0	0	3	3.84482	0	0	3.1	3.84482	0	0	3.2	3.85012	0	0	2	3.85012	0	0	2.1	3.85012	0	0	2.2	3.86928	0	0	1	3.86928	0	0	1.1	3.86928	0	0	1.2	3.8401
	3.82981	0	0	4	3.82981	0	0	4.1	3.82981	0	0	4.2	3.84603	0	0	3	3.84603	0	0	3.1	3.84603	0	0	3.2	3.85462	0	0	2	3.85462	0	0	2.1	3.85462	0	0	2.2	3.87379	0	0	1	3.87379	0	0	1.1	3.87379	0	0	1.2	3.8413
	3.8313	0	0	4	3.8313	0	0	4.1	3.8313	0	0	4.2	3.85054	0	0	3	3.85054	0	0	3.1	3.85054	0	0	3.2	3.85605	0	0	2	3.85605	0	0	2.1	3.85605	0	0	2.2	3.87529	0	0	1	3.87529	0	0	1.1	3.87529	0	0	1.2	3.84592
	3.8325	0	0	4	3.8325	0	0	4.1	3.8325	0	0	4.2	3.85202	0	0	3	3.85202	0	0	3.1	3.85202	0	0	3.2	3.85725	0	0	2	3.85725	0	0	2.1	3.85725	0	0	2.2	3.87649	0	0	1	3.87649	0	0	1.1	3.87649	0	0	1.2	3.8474
	3.83701	0	0	4	3.83701	0	0	4.1	3.83701	0	0	4.2	3.85323	0	0	3	3.85323	0	0	3.1	3.85323	0	0	3.2	3.86176	0	0	2	3.86176	0	0	2.1	3.86176	0	0	2.2	3.881	0	0	1	3.881	0	0	1.1	3.881	0	0	1.2	3.84861
	3.8385	0	0	4	3.8385	0	0	4.1	3.8385	0	0	4.2	3.85774	0	0	3	3.85774	0	0	3.1	3.85774	0	0	3.2	3.86325	0	0	2	3.86325	0	0	2.1	3.86325	0	0	2.2	3.88226	0	0	1	3.88226	0	0	1.1	3.88226	0	0	1.2	3.85312
	3.83998	0	0	4	3.83998	0	0	4.1	3.83998	0	0	4.2	3.85922	0	0	3	3.85922	0	0	3.1	3.85922	0	0	3.2	3.8646	0	0	2	3.8646	0	0	2.1	3.8646	0	0	2.2	3.88374	0	0	1	3.88374	0	0	1.1	3.88374	0	0	1.2	3.85458
	3.84119	0	0	4	3.84119	0	0	4.1	3.84119	0	0	4.2	3.86071	0	0	3	3.86071	0	0	3.1	3.86071	0	0	3.2	3.8658	0	0	2	3.8658	0	0	2.1	3.8658	0	0	2.2	3.88495	0	0	1	3.88495	0	0	1.1	3.88495	0	0	1.2	3.85606
	3.8457	0	0	4	3.8457	0	0	4.1	3.8457	0	0	4.2	3.86192	0	0	3	3.86192	0	0	3.1	3.86192	0	0	3.2	3.87031	0	0	2	3.87031	0	0	2.1	3.87031	0	0	2.2	3.88946	0	0	1	3.88946	0	0	1.1	3.88946	0	0	1.2	3.85727
	3.84696	0	0	4	3.84696	0	0	4.1	3.84696	0	0	4.2	3.86643	0	0	3	3.86643	0	0	3.1	3.86643	0	0	3.2	3.8718	0	0	2	3.8718	0	0	2.1	3.8718	0	0	2.2	3.89121	0	0	1	3.89121	0	0	1.1	3.89121	0	0	1.2	3.86178
	3.84844	0	0	4	3.84844	0	0	4.1	3.84844	0	0	4.2	3.86791	0	0	3	3.86791	0	0	3.1	3.86791	0	0	3.2	3.87328	0	0	2	3.87328	0	0	2.1	3.87328	0	0	2.2	3.89572	0	0	1	3.89572	0	0	1.1	3.89572	0	0	1.2	3.86303
	3.84965	0	0	4	3.84965	0	0	4.1	3.84965	0	0	4.2	3.86936	0	0	3	3.86936	0	0	3.1	3.86936	0	0	3.2	3.87449	0	0	2	3.87449	0	0	2.1	3.87449	0	0	2.2	3.89721	0	0	1	3.89721	0	0	1.1	3.89721	0	0	1.2	3.86452
	3.85416	0	0	4	3.85416	0	0	4.1	3.85416	0	0	4.2	3.87056	0	0	3	3.87056	0	0	3.1	3.87056	0	0	3.2	3.879	0	0	2	3.879	0	0	2.1	3.879	0	0	2.2	3.89869	0	0	1	3.89869	0	0	1.1	3.89869	0	0	1.2	3.86572
	3.85547	0	0	4	3.85547	0	0	4.1	3.85547	0	0	4.2	3.87507	0	0	3	3.87507	0	0	3.1	3.87507	0	0	3.2	3.88048	0	0	2	3.88048	0	0	2.1	3.88048	0	0	2.2	3.8999	0	0	1	3.8999	0	0	1.1	3.8999	0	0	1.2	3.87023
	3.85696	0	0	4	3.85696	0	0	4.1	3.85696	0	0	4.2	3.87656	0	0	3	3.87656	0	0	3.1	3.87656	0	0	3.2	3.88169	0	0	2	3.88169	0	0	2.1	3.88169	0	0	2.2	3.90441	0	0	1	3.90441	0	0	1.1	3.90441	0	0	1.2	3.87172
	3.85816	0	0	4	3.85816	0	0	4.1	3.85816	0	0	4.2	3.87776	0	0	3	3.87776	0	0	3.1	3.87776	0	0	3.2	3.8862	0	0	2	3.8862	0	0	2.1	3.8862	0	0	2.2	3.9059	0	0	1	3.9059	0	0	1.1	3.9059	0	0	1.2	3.87292
	3.86267	0	0	4	3.86267	0	0	4.1	3.86267	0	0	4.2	3.88227	0	0	3	3.88227	0	0	3.1	3.88227	0	0	3.2	3.88816	0	0	2	3.88816	0	0	2.1	3.88816	0	0	2.2	3.9071	0	0	1	3.9071	0	0	1.1	3.9071	0	0	1.2	3.87743
	3.86393	0	0	4	3.86393	0	0	4.1	3.86393	0	0	4.2	3.88376	0	0	3	3.88376	0	0	3.1	3.88376	0	0	3.2	3.89266	0	0	2	3.89266	0	0	2.1	3.89266	0	0	2.2	3.91161	0	0	1	3.91161	0	0	1.1	3.91161	0	0	1.2	3.87892
	3.86543	0	0	4	3.86543	0	0	4.1	3.86543	0	0	4.2	3.88524	0	0	3	3.88524	0	0	3.1	3.88524	0	0	3.2	3.89415	0	0	2	3.89415	0	0	2.1	3.89415	0	0	2.2	3.91338	0	0	1	3.91338	0	0	1.1	3.91338	0	0	1.2	3.8804
	3.86663	0	0	4	3.86663	0	0	4.1	3.86663	0	0	4.2	3.88645	0	0	3	3.88645	0	0	3.1	3.88645	0	0	3.2	3.89563	0	0	2	3.89563	0	0	2.1	3.89563	0	0	2.2	3.91812	0	0	1	3.91812	0	0	1.1	3.91812	0	0	1.2	3.88161
	3.87114	0	0	4	3.87114	0	0	4.1	3.87114	0	0	4.2	3.89096	0	0	3	3.89096	0	0	3.1	3.89096	0	0	3.2	3.89684	0	0	2	3.89684	0	0	2.1	3.89684	0	0	2.2	3.91961	0	0	1	3.91961	0	0	1.1	3.91961	0	0	1.2	3.88612
	3.87242	0	0	4	3.87242	0	0	4.1	3.87242	0	0	4.2	3.89244	0	0	3	3.89244	0	0	3.1	3.89244	0	0	3.2	3.90135	0	0	2	3.90135	0	0	2.1	3.90135	0	0	2.2	3.92081	0	0	1	3.92081	0	0	1.1	3.92081	0	0	1.2	3.88737
	3.8739	0	0	4	3.8739	0	0	4.1	3.8739	0	0	4.2	3.89393	0	0	3	3.89393	0	0	3.1	3.89393	0	0	3.2	3.90284	0	0	2	3.90284	0	0	2.1	3.90284	0	0	2.2	3.92532	0	0	1	3.92532	0	0	1.1	3.92532	0	0	1.2	3.8887
	3.87511	0	0	4	3.87511	0	0	4.1	3.87511	0	0	4.2	3.89513	0	0	3	3.89513	0	0	3.1	3.89513	0	0	3.2	3.90404	0	0	2	3.90404	0	0	2.1	3.90404	0	0	2.2	3.92796	0	0	1	3.92796	0	0	1.1	3.92796	0	0	1.2	3.88991
	3.87962	0	0	4	3.87962	0	0	4.1	3.87962	0	0	4.2	3.89964	0	0	3	3.89964	0	0	3.1	3.89964	0	0	3.2	3.90855	0	0	2	3.90855	0	0	2.1	3.90855	0	0	2.2	3.92917	0	0	1	3.92917	0	0	1.1	3.92917	0	0	1.2	3.89442
	3.8811	0	0	4	3.8811	0	0	4.1	3.8811	0	0	4.2	3.90113	0	0	3	3.90113	0	0	3.1	3.90113	0	0	3.2	3.90981	0	0	2	3.90981	0	0	2.1	3.90981	0	0	2.2	3.93368	0	0	1	3.93368	0	0	1.1	3.93368	0	0	1.2	3.8959
	3.88259	0	0	4	3.88259	0	0	4.1	3.88259	0	0	4.2	3.90238	0	0	3	3.90238	0	0	3.1	3.90238	0	0	3.2	3.91129	0	0	2	3.91129	0	0	2.1	3.91129	0	0	2.2	3.93516	0	0	1	3.93516	0	0	1.1	3.93516	0	0	1.2	3.89711
	3.88379	0	0	4	3.88379	0	0	4.1	3.88379	0	0	4.2	3.90359	0	0	3	3.90359	0	0	3.1	3.90359	0	0	3.2	3.9125	0	0	2	3.9125	0	0	2.1	3.9125	0	0	2.2	3.93642	0	0	1	3.93642	0	0	1.1	3.93642	0	0	1.2	3.90162
	3.8883	0	0	4	3.8883	0	0	4.1	3.8883	0	0	4.2	3.9081	0	0	3	3.9081	0	0	3.1	3.9081	0	0	3.2	3.91701	0	0	2	3.91701	0	0	2.1	3.91701	0	0	2.2	3.93762	0	0	1	3.93762	0	0	1.1	3.93762	0	0	1.2	3.9031
	3.88979	0	0	4	3.88979	0	0	4.1	3.88979	0	0	4.2	3.90959	0	0	3	3.90959	0	0	3.1	3.90959	0	0	3.2	3.91959	0	0	2	3.91959	0	0	2.1	3.91959	0	0	2.2	3.94236	0	0	1	3.94236	0	0	1.1	3.94236	0	0	1.2	3.90431
	3.89119	0	0	4	3.89119	0	0	4.1	3.89119	0	0	4.2	3.91107	0	0	3	3.91107	0	0	3.1	3.91107	0	0	3.2	3.9208	0	0	2	3.9208	0	0	2.1	3.9208	0	0	2.2	3.94385	0	0	1	3.94385	0	0	1.1	3.94385	0	0	1.2	3.90882
	3.89239	0	0	4	3.89239	0	0	4.1	3.89239	0	0	4.2	3.91228	0	0	3	3.91228	0	0	3.1	3.91228	0	0	3.2	3.92554	0	0	2	3.92554	0	0	2.1	3.92554	0	0	2.2	3.94533	0	0	1	3.94533	0	0	1.1	3.94533	0	0	1.2	3.9103
	3.8969	0	0	4	3.8969	0	0	4.1	3.8969	0	0	4.2	3.91679	0	0	3	3.91679	0	0	3.1	3.91679	0	0	3.2	3.92702	0	0	2	3.92702	0	0	2.1	3.92702	0	0	2.2	3.9475	0	0	1	3.9475	0	0	1.1	3.9475	0	0	1.2	3.91179
	3.89839	0	0	4	3.89839	0	0	4.1	3.89839	0	0	4.2	3.91827	0	0	3	3.91827	0	0	3.1	3.91827	0	0	3.2	3.92823	0	0	2	3.92823	0	0	2.1	3.92823	0	0	2.2	3.95201	0	0	1	3.95201	0	0	1.1	3.95201	0	0	1.2	3.91392
	3.89959	0	0	4	3.89959	0	0	4.1	3.89959	0	0	4.2	3.91976	0	0	3	3.91976	0	0	3.1	3.91976	0	0	3.2	3.93274	0	0	2	3.93274	0	0	2.1	3.93274	0	0	2.2	3.95349	0	0	1	3.95349	0	0	1.1	3.95349	0	0	1.2	3.91843
	3.9041	0	0	4	3.9041	0	0	4.1	3.9041	0	0	4.2	3.92096	0	0	3	3.92096	0	0	3.1	3.92096	0	0	3.2	3.93536	0	0	2	3.93536	0	0	2.1	3.93536	0	0	2.2	3.95498	0	0	1	3.95498	0	0	1.1	3.95498	0	0	1.2	3.91991
	3.90559	0	0	4	3.90559	0	0	4.1	3.90559	0	0	4.2	3.92547	0	0	3	3.92547	0	0	3.1	3.92547	0	0	3.2	3.93685	0	0	2	3.93685	0	0	2.1	3.93685	0	0	2.2	3.95618	0	0	1	3.95618	0	0	1.1	3.95618	0	0	1.2	3.9214
	3.90707	0	0	4	3.90707	0	0	4.1	3.90707	0	0	4.2	3.92696	0	0	3	3.92696	0	0	3.1	3.92696	0	0	3.2	3.93805	0	0	2	3.93805	0	0	2.1	3.93805	0	0	2.2	3.96069	0	0	1	3.96069	0	0	1.1	3.96069	0	0	1.2	3.9226
	3.90828	0	0	4	3.90828	0	0	4.1	3.90828	0	0	4.2	3.92816	0	0	3	3.92816	0	0	3.1	3.92816	0	0	3.2	3.94256	0	0	2	3.94256	0	0	2.1	3.94256	0	0	2.2	3.96218	0	0	1	3.96218	0	0	1.1	3.96218	0	0	1.2	3.92711
	3.9141	0	0	4	3.9141	0	0	4.1	3.9141	0	0	4.2	3.93267	0	0	3	3.93267	0	0	3.1	3.93267	0	0	3.2	3.94405	0	0	2	3.94405	0	0	2.1	3.94405	0	0	2.2	3.96338	0	0	1	3.96338	0	0	1.1	3.96338	0	0	1.2	3.9286
	3.91883	0	0	4	3.91883	0	0	4.1	3.91883	0	0	4.2	3.93414	0	0	3	3.93414	0	0	3.1	3.93414	0	0	3.2	3.94553	0	0	2	3.94553	0	0	2.1	3.94553	0	0	2.2	3.96789	0	0	1	3.96789	0	0	1.1	3.96789	0	0	1.2	3.93008
	3.92024	0	0	4	3.92024	0	0	4.1	3.92024	0	0	4.2	3.93562	0	0	3	3.93562	0	0	3.1	3.93562	0	0	3.2	3.94674	0	0	2	3.94674	0	0	2.1	3.94674	0	0	2.2	3.96938	0	0	1	3.96938	0	0	1.1	3.96938	0	0	1.2	3.93129
	3.92173	0	0	4	3.92173	0	0	4.1	3.92173	0	0	4.2	3.93683	0	0	3	3.93683	0	0	3.1	3.93683	0	0	3.2	3.95125	0	0	2	3.95125	0	0	2.1	3.95125	0	0	2.2	3.97086	0	0	1	3.97086	0	0	1.1	3.97086	0	0	1.2	3.9358
	3.92387	0	0	4	3.92387	0	0	4.1	3.92387	0	0	4.2	3.94157	0	0	3	3.94157	0	0	3.1	3.94157	0	0	3.2	3.95273	0	0	2	3.95273	0	0	2.1	3.95273	0	0	2.2	3.97207	0	0	1	3.97207	0	0	1.1	3.97207	0	0	1.2	3.93728
	3.92848	0	0	4	3.92848	0	0	4.1	3.92848	0	0	4.2	3.94304	0	0	3	3.94304	0	0	3.1	3.94304	0	0	3.2	3.95422	0	0	2	3.95422	0	0	2.1	3.95422	0	0	2.2	3.97658	0	0	1	3.97658	0	0	1.1	3.97658	0	0	1.2	3.93879
	3.92997	0	0	4	3.92997	0	0	4.1	3.92997	0	0	4.2	3.94453	0	0	3	3.94453	0	0	3.1	3.94453	0	0	3.2	3.95543	0	0	2	3.95543	0	0	2.1	3.95543	0	0	2.2	3.97806	0	0	1	3.97806	0	0	1.1	3.97806	0	0	1.2	3.93999
	3.93146	0	0	4	3.93146	0	0	4.1	3.93146	0	0	4.2	3.94666	0	0	3	3.94666	0	0	3.1	3.94666	0	0	3.2	3.95993	0	0	2	3.95993	0	0	2.1	3.95993	0	0	2.2	3.97955	0	0	1	3.97955	0	0	1.1	3.97955	0	0	1.2	3.9445
	3.93266	0	0	4	3.93266	0	0	4.1	3.93266	0	0	4.2	3.9514	0	0	3	3.9514	0	0	3.1	3.9514	0	0	3.2	3.96142	0	0	2	3.96142	0	0	2.1	3.96142	0	0	2.2	3.98075	0	0	1	3.98075	0	0	1.1	3.98075	0	0	1.2	3.94576
	3.93717	0	0	4	3.93717	0	0	4.1	3.93717	0	0	4.2	3.95289	0	0	3	3.95289	0	0	3.1	3.95289	0	0	3.2	3.96267	0	0	2	3.96267	0	0	2.1	3.96267	0	0	2.2	3.98526	0	0	1	3.98526	0	0	1.1	3.98526	0	0	1.2	3.94696
	3.93866	0	0	4	3.93866	0	0	4.1	3.93866	0	0	4.2	3.95437	0	0	3	3.95437	0	0	3.1	3.95437	0	0	3.2	3.96388	0	0	2	3.96388	0	0	2.1	3.96388	0	0	2.2	3.98664	0	0	1	3.98664	0	0	1.1	3.98664	0	0	1.2	3.9517
	3.93986	0	0	4	3.93986	0	0	4.1	3.93986	0	0	4.2	3.95651	0	0	3	3.95651	0	0	3.1	3.95651	0	0	3.2	3.96862	0	0	2	3.96862	0	0	2.1	3.96862	0	0	2.2	3.98813	0	0	1	3.98813	0	0	1.1	3.98813	0	0	1.2	3.95319
	3.94461	0	0	4	3.94461	0	0	4.1	3.94461	0	0	4.2	3.96102	0	0	3	3.96102	0	0	3.1	3.96102	0	0	3.2	3.97011	0	0	2	3.97011	0	0	2.1	3.97011	0	0	2.2	3.98934	0	0	1	3.98934	0	0	1.1	3.98934	0	0	1.2	3.95467
	3.94697	0	0	4	3.94697	0	0	4.1	3.94697	0	0	4.2	3.96251	0	0	3	3.96251	0	0	3.1	3.96251	0	0	3.2	3.97159	0	0	2	3.97159	0	0	2.1	3.97159	0	0	2.2	3.99385	0	0	1	3.99385	0	0	1.1	3.99385	0	0	1.2	3.9568
	3.94846	0	0	4	3.94846	0	0	4.1	3.94846	0	0	4.2	3.96399	0	0	3	3.96399	0	0	3.1	3.96399	0	0	3.2	3.97374	0	0	2	3.97374	0	0	2.1	3.97374	0	0	2.2	3.99533	0	0	1	3.99533	0	0	1.1	3.99533	0	0	1.2	3.96153
	3.95059	0	0	4	3.95059	0	0	4.1	3.95059	11471.3	9.53781e-05	4.2001	3.9652	0	0	3	3.9652	0	0	3.1	3.9652	0	0	3.2	3.97825	0	0	2	3.97825	0	0	2.1	3.97825	0	0	2.2	3.99682	0	0	1	3.99682	0	0	1.1	3.99682	0	0	1.2	3.96302
	3.9551	0	0	4	3.9551	0	0	4.1	3.9551	0	0	4.2	3.96971	0	0	3	3.96971	0	0	3.1	3.96971	0	0	3.2	3.97952	0	0	2	3.97952	0	0	2.1	3.97952	0	0	2.2	3.99802	0	0	1	3.99802	0	0	1.1	3.99802	0	0	1.2	3.96449
	3.95644	0	0	4	3.95644	0	0	4.1	3.95644	0	0	4.2	3.97119	0	0	3	3.97119	0	0	3.1	3.97119	0	0	3.2	3.98073	0	0	2	3.98073	0	0	2.1	3.98073	0	0	2.2	4.00253	0	0	1	4.00253	0	0	1.1	4.00253	0	0	1.2	3.9666
	3.95792	0	0	4	3.95792	0	0	4.1	3.95792	0	0	4.2	3.97268	0	0	3	3.97268	0	0	3.1	3.97268	0	0	3.2	3.98524	0	0	2	3.98524	0	0	2.1	3.98524	0	0	2.2	4.00396	0	0	1	4.00396	0	0	1.1	4.00396	0	0	1.2	3.97111
	3.95913	0	0	4	3.95913	0	0	4.1	3.95913	0	0	4.2	3.97388	0	0	3	3.97388	0	0	3.1	3.97388	0	0	3.2	3.98672	0	0	2	3.98672	0	0	2.1	3.98672	0	0	2.2	4.00544	0	0	1	4.00544	0	0	1.1	4.00544	0	0	1.2	3.9726
	3.96364	0	0	4	3.96364	0	0	4.1	3.96364	0	0	4.2	3.97839	0	0	3	3.97839	0	0	3.1	3.97839	0	0	3.2	3.98821	0	0	2	3.98821	0	0	2.1	3.98821	0	0	2.2	4.00665	0	0	1	4.00665	0	0	1.1	4.00665	0	0	1.2	3.97408
	3.96512	0	0	4	3.96512	0	0	4.1	3.96512	0	0	4.2	3.97988	0	0	3	3.97988	0	0	3.1	3.97988	0	0	3.2	3.98941	0	0	2	3.98941	0	0	2.1	3.98941	0	0	2.2	4.01116	0	0	1	4.01116	0	0	1.1	4.01116	0	0	1.2	3.97529
	3.96638	0	0	4	3.96638	0	0	4.1	3.96638	0	0	4.2	3.98136	0	0	3	3.98136	0	0	3.1	3.98136	0	0	3.2	3.99392	0	0	2	3.99392	0	0	2.1	3.99392	0	0	2.2	4.01264	0	0	1	4.01264	0	0	1.1	4.01264	0	0	1.2	3.9798
	3.96759	0	0	4	3.96759	0	0	4.1	3.96759	0	0	4.2	3.98257	0	0	3	3.98257	0	0	3.1	3.98257	0	0	3.2	3.99541	0	0	2	3.99541	0	0	2.1	3.99541	0	0	2.2	4.01408	0	0	1	4.01408	0	0	1.1	4.01408	0	0	1.2	3.98105
	3.97209	0	0	4	3.97209	0	0	4.1	3.97209	0	0	4.2	3.98708	0	0	3	3.98708	0	0	3.1	3.98708	0	0	3.2	3.99689	0	0	2	3.99689	0	0	2.1	3.99689	0	0	2.2	4.01528	0	0	1	4.01528	0	0	1.1	4.01528	0	0	1.2	3.98254
	3.97358	0	0	4	3.97358	0	0	4.1	3.97358	0	0	4.2	3.98856	0	0	3	3.98856	0	0	3.1	3.98856	0	0	3.2	3.9981	0	0	2	3.9981	0	0	2.1	3.9981	0	0	2.2	4.01979	0	0	1	4.01979	0	0	1.1	4.01979	0	0	1.2	3.98374
	3.97507	0	0	4	3.97507	0	0	4.1	3.97507	0	0	4.2	3.98977	12357.5	0.00531374	3.00531	3.98977	0	0	3.1	3.98977	0	0	3.2	4.00261	0	0	2	4.00261	0	0	2.1	4.00261	0	0	2.2	4.02128	0	0	1	4.02128	0	0	1.1	4.02128	0	0	1.2	3.98825
	3.97627	0	0	4	3.97627	0	0	4.1	3.97627	0	0	4.2	3.99428	0	0	3	3.99428	0	0	3.1	3.99428	0	0	3.2	4.004	0	0	2	4.004	0	0	2.1	4.004	0	0	2.2	4.02277	0	0	1	4.02277	0	0	1.1	4.02277	0	0	1.2	3.98958
	3.98078	0	0	4	3.98078	0	0	4.1	3.98078	0	0	4.2	3.99553	0	0	3	3.99553	0	0	3.1	3.99553	0	0	3.2	4.00549	0	0	2	4.00549	0	0	2.1	4.00549	0	0	2.2	4.02397	0	0	1	4.02397	0	0	1.1	4.02397	0	0	1.2	3.99107
	3.98227	0	0	4	3.98227	0	0	4.1	3.98227	0	0	4.2	3.99702	0	0	3	3.99702	0	0	3.1	3.99702	0	0	3.2	4.0067	0	0	2	4.0067	0	0	2.1	4.0067	0	0	2.2	4.02848	0	0	1	4.02848	0	0	1.1	4.02848	0	0	1.2	3.99227
	3.98375	0	0	4	3.98375	0	0	4.1	3.98375	0	0	4.2	3.99823	0	0	3	3.99823	0	0	3.1	3.99823	0	0	3.2	4.0112	0	0	2	4.0112	0	0	2.1	4.0112	0	0	2.2	4.02997	0	0	1	4.02997	0	0	1.1	4.02997	0	0	1.2	3.99678
	3.98496	0	0	4	3.98496	0	0	4.1	3.98496	0	0	4.2	4.00273	0	0	3	4.00273	0	0	3.1	4.00273	0	0	3.2	4.01269	0	0	2	4.01269	0	0	2.1	4.01269	0	0	2.2	4.03117	0	0	1	4.03117	0	0	1.1	4.03117	0	0	1.2	3.99827
	3.98946	0	0	4	3.98946	0	0	4.1	3.98946	0	0	4.2	4.00422	0	0	3	4.00422	0	0	3.1	4.00422	0	0	3.2	4.01418	0	0	2	4.01418	0	0	2.1	4.01418	0	0	2.2	4.03568	0	0	1	4.03568	0	0	1.1	4.03568	0	0	1.2	3.99975
	3.99095	0	0	4	3.99095	0	0	4.1	3.99095	0	0	4.2	4.00571	0	0	3	4.00571	0	0	3.1	4.00571	0	0	3.2	4.01539	0	0	2	4.01539	0	0	2.1	4.01539	0	0	2.2	4.03717	0	0	1	4.03717	0	0	1.1	4.03717	0	0	1.2	4.00096
	3.99243	0	0	4	3.99243	0	0	4.1	3.99243	0	0	4.2	4.00691	0	0	3	4.00691	0	0	3.1	4.00691	0	0	3.2	4.01989	0	0	2	4.01989	0	0	2.1	4.01989	0	0	2.2	4.03866	0	0	1	4.03866	0	0	1.1	4.03866	0	0	1.2	4.0057
	3.99364	0	0	4	3.99364	0	0	4.1	3.99364	0	0	4.2	4.01142	0	0	3	4.01142	0	0	3.1	4.01142	0	0	3.2	4.02139	0	0	2	4.02139	0	0	2.1	4.02139	0	0	2.2	4.03986	0	0	1	4.03986	0	0	1.1	4.03986	0	0	1.2	4.00718
	3.99815	0	0	4	3.99815	0	0	4.1	3.99815	0	0	4.2	4.01268	0	0	3	4.01268	0	0	3.1	4.01268	0	0	3.2	4.02287	0	0	2	4.02287	0	0	2.1	4.02287	0	0	2.2	4.04437	0	0	1	4.04437	0	0	1.1	4.04437	0	0	1.2	4.00867
	3.99963	0	0	4	3.99963	0	0	4.1	3.99963	0	0	4.2	4.01416	0	0	3	4.01416	0	0	3.1	4.01416	0	0	3.2	4.02408	0	0	2	4.02408	0	0	2.1	4.02408	0	0	2.2	4.04563	0	0	1	4.04563	0	0	1.1	4.04563	0	0	1.2	4.01079
	4.00084	0	0	4	4.00084	0	0	4.1	4.00084	0	0	4.2	4.01537	0	0	3	4.01537	0	0	3.1	4.01537	0	0	3.2	4.02859	0	0	2	4.02859	0	0	2.1	4.02859	0	0	2.2	4.04711	0	0	1	4.04711	0	0	1.1	4.04711	0	0	1.2	4.0153
	4.00535	0	0	4	4.00535	0	0	4.1	4.00535	0	0	4.2	4.01988	0	0	3	4.01988	0	0	3.1	4.01988	0	0	3.2	4.03	0	0	2	4.03	0	0	2.1	4.03	0	0	2.2	4.04832	0	0	1	4.04832	0	0	1.1	4.04832	0	0	1.2	4.01673
	4.00661	0	0	4	4.00661	0	0	4.1	4.00661	0	0	4.2	4.02136	0	0	3	4.02136	0	0	3.1	4.02136	0	0	3.2	4.03149	0	0	2	4.03149	0	0	2.1	4.03149	0	0	2.2	4.05283	0	0	1	4.05283	0	0	1.1	4.05283	0	0	1.2	4.01821
	4.0081	0	0	4	4.0081	0	0	4.1	4.0081	0	0	4.2	4.02257	0	0	3	4.02257	0	0	3.1	4.02257	0	0	3.2	4.03269	0	0	2	4.03269	0	0	2.1	4.03269	0	0	2.2	4.05477	0	0	1	4.05477	0	0	1.1	4.05477	0	0	1.2	4.01942
	4.0093	0	0	4	4.0093	0	0	4.1	4.0093	0	0	4.2	4.02708	0	0	3	4.02708	0	0	3.1	4.02708	0	0	3.2	4.0372	0	0	2	4.0372	0	0	2.1	4.0372	0	0	2.2	4.05927	0	0	1	4.05927	0	0	1.1	4.05927	0	0	1.2	4.02392
	4.01381	0	0	4	4.01381	0	0	4.1	4.01381	0	0	4.2	4.02856	0	0	3	4.02856	0	0	3.1	4.02856	0	0	3.2	4.0387	0	0	2	4.0387	0	0	2.1	4.0387	0	0	2.2	4.06076	0	0	1	4.06076	0	0	1.1	4.06076	0	0	1.2	4.02541
	4.0151	0	0	4	4.0151	0	0	4.1	4.0151	0	0	4.2	4.02982	0	0	3	4.02982	0	0	3.1	4.02982	0	0	3.2	4.04019	0	0	2	4.04019	0	0	2.1	4.04019	0	0	2.2	4.06225	0	0	1	4.06225	0	0	1.1	4.06225	0	0	1.2	4.02662
	4.01658	0	0	4	4.01658	0	0	4.1	4.01658	0	0	4.2	4.03103	0	0	3	4.03103	0	0	3.1	4.03103	0	0	3.2	4.04139	0	0	2	4.04139	0	0	2.1	4.04139	0	0	2.2	4.06345	0	0	1	4.06345	0	0	1.1	4.06345	0	0	1.2	4.03112
	4.01779	0	0	4	4.01779	0	0	4.1	4.01779	0	0	4.2	4.03554	0	0	3	4.03554	0	0	3.1	4.03554	0	0	3.2	4.0459	0	0	2	4.0459	0	0	2.1	4.0459	0	0	2.2	4.06796	0	0	1	4.06796	0	0	1.1	4.06796	0	0	1.2	4.03261
	4.0223	0	0	4	4.0223	0	0	4.1	4.0223	0	0	4.2	4.03702	0	0	3	4.03702	0	0	3.1	4.03702	0	0	3.2	4.04739	0	0	2	4.04739	0	0	2.1	4.04739	0	0	2.2	4.06945	0	0	1	4.06945	0	0	1.1	4.06945	0	0	1.2	4.0341
	4.02356	0	0	4	4.02356	0	0	4.1	4.02356	0	0	4.2	4.03851	0	0	3	4.03851	0	0	3.1	4.03851	0	0	3.2	4.04859	0	0	2	4.04859	0	0	2.1	4.04859	0	0	2.2	4.07065	0	0	1	4.07065	0	0	1.1	4.07065	0	0	1.2	4.03531
	4.02476	0	0	4	4.02476	0	0	4.1	4.02476	0	0	4.2	4.03971	0	0	3	4.03971	0	0	3.1	4.03971	26433.2	0.000219779	3.20022	4.0531	0	0	2	4.0531	0	0	2.1	4.0531	0	0	2.2	4.07539	0	0	1	4.07539	0	0	1.1	4.07539	0	0	1.2	4.03981
	4.02927	0	0	4	4.02927	0	0	4.1	4.02927	0	0	4.2	4.04422	0	0	3	4.04422	0	0	3.1	4.04422	0	0	3.2	4.05459	0	0	2	4.05459	0	0	2.1	4.05459	0	0	2.2	4.07777	0	0	1	4.07777	0	0	1.1	4.07777	0	0	1.2	4.0413
	4.03056	0	0	4	4.03056	0	0	4.1	4.03056	0	0	4.2	4.04571	0	0	3	4.04571	0	0	3.1	4.04571	0	0	3.2	4.05607	0	0	2	4.05607	0	0	2.1	4.05607	0	0	2.2	4.07902	0	0	1	4.07902	0	0	1.1	4.07902	0	0	1.2	4.04251
	4.03205	0	0	4	4.03205	0	0	4.1	4.03205	0	0	4.2	4.04691	0	0	3	4.04691	0	0	3.1	4.04691	0	0	3.2	4.05728	0	0	2	4.05728	0	0	2.1	4.05728	0	0	2.2	4.08117	0	0	1	4.08117	0	0	1.1	4.08117	0	0	1.2	4.04702
	4.03325	0	0	4	4.03325	0	0	4.1	4.03325	0	0	4.2	4.05142	0	0	3	4.05142	0	0	3.1	4.05142	0	0	3.2	4.06179	0	0	2	4.06179	0	0	2.1	4.06179	0	0	2.2	4.08568	0	0	1	4.08568	0	0	1.1	4.08568	0	0	1.2	4.04827
	4.03776	0	0	4	4.03776	0	0	4.1	4.03776	0	0	4.2	4.05291	0	0	3	4.05291	0	0	3.1	4.05291	0	0	3.2	4.06327	0	0	2	4.06327	0	0	2.1	4.06327	0	0	2.2	4.08717	0	0	1	4.08717	0	0	1.1	4.08717	0	0	1.2	4.04962
	4.03925	0	0	4	4.03925	0	0	4.1	4.03925	0	0	4.2	4.05411	0	0	3	4.05411	0	0	3.1	4.05411	0	0	3.2	4.06448	0	0	2	4.06448	0	0	2.1	4.06448	0	0	2.2	4.08837	0	0	1	4.08837	0	0	1.1	4.08837	0	0	1.2	4.05082
	4.04073	0	0	4	4.04073	0	0	4.1	4.04073	0	0	4.2	4.05862	0	0	3	4.05862	0	0	3.1	4.05862	0	0	3.2	4.06899	0	0	2	4.06899	0	0	2.1	4.06899	0	0	2.2	4.09288	0	0	1	4.09288	0	0	1.1	4.09288	0	0	1.2	4.05533
	4.04194	0	0	4	4.04194	0	0	4.1	4.04194	0	0	4.2	4.05988	0	0	3	4.05988	0	0	3.1	4.05988	0	0	3.2	4.07024	0	0	2	4.07024	0	0	2.1	4.07024	0	0	2.2	4.09428	0	0	1	4.09428	0	0	1.1	4.09428	0	0	1.2	4.05682
	4.04645	0	0	4	4.04645	0	0	4.1	4.04645	0	0	4.2	4.06108	0	0	3	4.06108	0	0	3.1	4.06108	0	0	3.2	4.07173	0	0	2	4.07173	0	0	2.1	4.07173	0	0	2.2	4.09548	0	0	1	4.09548	0	0	1.1	4.09548	0	0	1.2	4.05802
	4.04793	0	0	4	4.04793	0	0	4.1	4.04793	0	0	4.2	4.06559	0	0	3	4.06559	0	0	3.1	4.06559	0	0	3.2	4.07294	0	0	2	4.07294	0	0	2.1	4.07294	0	0	2.2	4.10022	0	0	1	4.10022	0	0	1.1	4.10022	0	0	1.2	4.06253
	4.04914	0	0	4	4.04914	0	0	4.1	4.04914	0	0	4.2	4.06708	0	0	3	4.06708	0	0	3.1	4.06708	0	0	3.2	4.07744	0	0	2	4.07744	0	0	2.1	4.07744	0	0	2.2	4.10171	0	0	1	4.10171	0	0	1.1	4.10171	0	0	1.2	4.06402
	4.05365	0	0	4	4.05365	0	0	4.1	4.05365	0	0	4.2	4.06857	0	0	3	4.06857	0	0	3.1	4.06857	0	0	3.2	4.07923	0	0	2	4.07923	0	0	2.1	4.07923	0	0	2.2	4.10291	0	0	1	4.10291	0	0	1.1	4.10291	0	0	1.2	4.0655
	4.05513	0	0	4	4.05513	0	0	4.1	4.05513	0	0	4.2	4.06977	0	0	3	4.06977	0	0	3.1	4.06977	0	0	3.2	4.08374	0	0	2	4.08374	0	0	2.1	4.08374	0	0	2.2	4.10742	0	0	1	4.10742	0	0	1.1	4.10742	0	0	1.2	4.06671
	4.05662	0	0	4	4.05662	0	0	4.1	4.05662	0	0	4.2	4.07428	0	0	3	4.07428	0	0	3.1	4.07428	0	0	3.2	4.08522	0	0	2	4.08522	0	0	2.1	4.08522	0	0	2.2	4.10922	0	0	1	4.10922	0	0	1.1	4.10922	0	0	1.2	4.07122
	4.05782	0	0	4	4.05782	0	0	4.1	4.05782	0	0	4.2	4.07577	0	0	3	4.07577	0	0	3.1	4.07577	0	0	3.2	4.08643	0	0	2	4.08643	0	0	2.1	4.08643	0	0	2.2	4.11372	0	0	1	4.11372	0	0	1.1	4.11372	0	0	1.2	4.0727
	4.06233	0	0	4	4.06233	0	0	4.1	4.06233	0	0	4.2	4.07725	0	0	3	4.07725	0	0	3.1	4.07725	0	0	3.2	4.09094	0	0	2	4.09094	0	0	2.1	4.09094	0	0	2.2	4.11521	0	0	1	4.11521	0	0	1.1	4.11521	0	0	1.2	4.07391
	4.06382	0	0	4	4.06382	0	0	4.1	4.06382	0	0	4.2	4.07846	0	0	3	4.07846	0	0	3.1	4.07846	0	0	3.2	4.09273	0	0	2	4.09273	0	0	2.1	4.09273	0	0	2.2	4.1167	0	0	1	4.1167	0	0	1.1	4.1167	0	0	1.2	4.07865
	4.06508	0	0	4	4.06508	0	0	4.1	4.06508	0	0	4.2	4.08297	0	0	3	4.08297	0	0	3.1	4.08297	0	0	3.2	4.09723	0	0	2	4.09723	0	0	2.1	4.09723	0	0	2.2	4.1179	0	0	1	4.1179	0	0	1.1	4.1179	0	0	1.2	4.08015
	4.06628	0	0	4	4.06628	0	0	4.1	4.06628	0	0	4.2	4.08422	0	0	3	4.08422	0	0	3.1	4.08422	0	0	3.2	4.09988	0	0	2	4.09988	0	0	2.1	4.09988	0	0	2.2	4.12241	0	0	1	4.12241	0	0	1.1	4.12241	0	0	1.2	4.08164
	4.07102	0	0	4	4.07102	0	0	4.1	4.07102	0	0	4.2	4.08571	0	0	3	4.08571	0	0	3.1	4.08571	0	0	3.2	4.10109	0	0	2	4.10109	0	0	2.1	4.10109	0	0	2.2	4.1239	0	0	1	4.1239	0	0	1.1	4.1239	0	0	1.2	4.08375
	4.07341	0	0	4	4.07341	0	0	4.1	4.07341	0	0	4.2	4.08691	0	0	3	4.08691	0	0	3.1	4.08691	0	0	3.2	4.10559	0	0	2	4.10559	0	0	2.1	4.10559	0	0	2.2	4.1251	0	0	1	4.1251	0	0	1.1	4.1251	0	0	1.2	4.08826
	4.07462	0	0	4	4.07462	0	0	4.1	4.07462	0	0	4.2	4.09142	0	0	3	4.09142	0	0	3.1	4.09142	0	0	3.2	4.10708	0	0	2	4.10708	0	0	2.1	4.10708	0	0	2.2	4.12961	0	0	1	4.12961	0	0	1.1	4.12961	0	0	1.2	4.08975
	4.07936	0	0	4	4.07936	0	0	4.1	4.07936	0	0	4.2	4.09279	0	0	3	4.09279	0	0	3.1	4.09279	0	0	3.2	4.10856	0	0	2	4.10856	0	0	2.1	4.10856	0	0	2.2	4.13109	0	0	1	4.13109	0	0	1.1	4.13109	0	0	1.2	4.09123
	4.08068	0	0	4	4.08068	0	0	4.1	4.08068	0	0	4.2	4.09428	0	0	3	4.09428	0	0	3.1	4.09428	0	0	3.2	4.10977	0	0	2	4.10977	0	0	2.1	4.10977	0	0	2.2	4.13258	0	0	1	4.13258	0	0	1.1	4.13258	0	0	1.2	4.09244
	4.08217	0	0	4	4.08217	0	0	4.1	4.08217	0	0	4.2	4.09548	0	0	3	4.09548	0	0	3.1	4.09548	0	0	3.2	4.11428	0	0	2	4.11428	0	0	2.1	4.11428	0	0	2.2	4.13379	0	0	1	4.13379	0	0	1.1	4.13379	0	0	1.2	4.09694
	4.08431	0	0	4	4.08431	0	0	4.1	4.08431	0	0	4.2	4.10022	0	0	3	4.10022	0	0	3.1	4.10022	0	0	3.2	4.11576	0	0	2	4.11576	0	0	2.1	4.11576	0	0	2.2	4.1383	0	0	1	4.1383	0	0	1.1	4.1383	0	0	1.2	4.09843
	4.08905	0	0	4	4.08905	0	0	4.1	4.08905	0	0	4.2	4.10171	0	0	3	4.10171	0	0	3.1	4.10171	0	0	3.2	4.11725	0	0	2	4.11725	0	0	2.1	4.11725	0	0	2.2	4.13978	0	0	1	4.13978	0	0	1.1	4.13978	0	0	1.2	4.09992
	4.09054	0	0	4	4.09054	0	0	4.1	4.09054	0	0	4.2	4.10318	0	0	3	4.10318	0	0	3.1	4.10318	0	0	3.2	4.11845	0	0	2	4.11845	0	0	2.1	4.11845	0	0	2.2	4.14099	0	0	1	4.14099	0	0	1.1	4.14099	0	0	1.2	4.10112
	4.09174	0	0	4	4.09174	0	0	4.1	4.09174	0	0	4.2	4.10532	0	0	3	4.10532	0	0	3.1	4.10532	0	0	3.2	4.12296	0	0	2	4.12296	0	0	2.1	4.12296	0	0	2.2	4.1455	0	0	1	4.1455	0	0	1.1	4.1455	0	0	1.2	4.10563
	4.09625	0	0	4	4.09625	0	0	4.1	4.09625	0	0	4.2	4.11006	0	0	3	4.11006	0	0	3.1	4.11006	0	0	3.2	4.12422	0	0	2	4.12422	0	0	2.1	4.12422	0	0	2.2	4.14677	0	0	1	4.14677	0	0	1.1	4.14677	0	0	1.2	4.10688
	4.09774	0	0	4	4.09774	0	0	4.1	4.09774	0	0	4.2	4.11154	0	0	3	4.11154	0	0	3.1	4.11154	0	0	3.2	4.12571	0	0	2	4.12571	0	0	2.1	4.12571	0	0	2.2	4.14826	0	0	1	4.14826	0	0	1.1	4.14826	0	0	1.2	4.10837
	4.09922	0	0	4	4.09922	0	0	4.1	4.09922	0	0	4.2	4.11275	0	0	3	4.11275	0	0	3.1	4.11275	10794.3	8.97488e-05	3.20009	4.12691	0	0	2	4.12691	0	0	2.1	4.12691	0	0	2.2	4.14946	0	0	1	4.14946	0	0	1.1	4.14946	0	0	1.2	4.10958
	4.10043	0	0	4	4.10043	0	0	4.1	4.10043	0	0	4.2	4.11726	0	0	3	4.11726	0	0	3.1	4.11726	0	0	3.2	4.13142	0	0	2	4.13142	0	0	2.1	4.13142	0	0	2.2	4.1542	0	0	1	4.1542	0	0	1.1	4.1542	0	0	1.2	4.11431
	4.10494	0	0	4	4.10494	0	0	4.1	4.10494	0	0	4.2	4.11876	0	0	3	4.11876	0	0	3.1	4.11876	0	0	3.2	4.13291	0	0	2	4.13291	0	0	2.1	4.13291	0	0	2.2	4.15568	0	0	1	4.15568	0	0	1.1	4.15568	0	0	1.2	4.1158
	4.10642	0	0	4	4.10642	0	0	4.1	4.10642	0	0	4.2	4.11996	0	0	3	4.11996	0	0	3.1	4.11996	0	0	3.2	4.13411	0	0	2	4.13411	0	0	2.1	4.13411	0	0	2.2	4.15717	0	0	1	4.15717	0	0	1.1	4.15717	0	0	1.2	4.11706
	4.10791	0	0	4	4.10791	0	0	4.1	4.10791	0	0	4.2	4.12447	0	0	3	4.12447	0	0	3.1	4.12447	0	0	3.2	4.13862	0	0	2	4.13862	0	0	2.1	4.13862	0	0	2.2	4.15931	0	0	1	4.15931	0	0	1.1	4.15931	0	0	1.2	4.11917
	4.10912	0	0	4	4.10912	0	0	4.1	4.10912	0	0	4.2	4.12596	0	0	3	4.12596	0	0	3.1	4.12596	0	0	3.2	4.1399	0	0	2	4.1399	0	0	2.1	4.1399	0	0	2.2	4.16382	0	0	1	4.16382	0	0	1.1	4.16382	0	0	1.2	4.12391
	4.11362	0	0	4	4.11362	0	0	4.1	4.11362	0	0	4.2	4.12744	0	0	3	4.12744	0	0	3.1	4.12744	0	0	3.2	4.14111	0	0	2	4.14111	0	0	2.1	4.14111	0	0	2.2	4.16531	0	0	1	4.16531	0	0	1.1	4.16531	0	0	1.2	4.12531
	4.11488	0	0	4	4.11488	0	0	4.1	4.11488	0	0	4.2	4.12865	0	0	3	4.12865	0	0	3.1	4.12865	0	0	3.2	4.14562	0	0	2	4.14562	0	0	2.1	4.14562	0	0	2.2	4.16651	0	0	1	4.16651	0	0	1.1	4.16651	0	0	1.2	4.12681
	4.11617	0	0	4	4.11617	0	0	4.1	4.11617	0	0	4.2	4.13316	0	0	3	4.13316	0	0	3.1	4.13316	0	0	3.2	4.1471	0	0	2	4.1471	0	0	2.1	4.1471	0	0	2.2	4.17102	0	0	1	4.17102	0	0	1.1	4.17102	0	0	1.2	4.12894
	4.11738	0	0	4	4.11738	0	0	4.1	4.11738	0	0	4.2	4.13464	0	0	3	4.13464	0	0	3.1	4.13464	0	0	3.2	4.14831	0	0	2	4.14831	0	0	2.1	4.14831	0	0	2.2	4.17242	0	0	1	4.17242	0	0	1.1	4.17242	0	0	1.2	4.13345
	4.12189	0	0	4	4.12189	0	0	4.1	4.12189	0	0	4.2	4.13613	0	0	3	4.13613	0	0	3.1	4.13613	0	0	3.2	4.15305	0	0	2	4.15305	0	0	2.1	4.15305	0	0	2.2	4.17391	0	0	1	4.17391	0	0	1.1	4.17391	0	0	1.2	4.13493
	4.12337	0	0	4	4.12337	0	0	4.1	4.12337	0	0	4.2	4.13734	0	0	3	4.13734	0	0	3.1	4.13734	0	0	3.2	4.15453	0	0	2	4.15453	0	0	2.1	4.15453	0	0	2.2	4.17511	0	0	1	4.17511	0	0	1.1	4.17511	0	0	1.2	4.13642
	4.12463	0	0	4	4.12463	0	0	4.1	4.12463	0	0	4.2	4.14185	0	0	3	4.14185	0	0	3.1	4.14185	0	0	3.2	4.15574	0	0	2	4.15574	0	0	2.1	4.15574	0	0	2.2	4.17962	0	0	1	4.17962	0	0	1.1	4.17962	0	0	1.2	4.13762
	4.12583	0	0	4	4.12583	0	0	4.1	4.12583	0	0	4.2	4.14333	0	0	3	4.14333	0	0	3.1	4.14333	0	0	3.2	4.16025	0	0	2	4.16025	0	0	2.1	4.16025	0	0	2.2	4.18111	0	0	1	4.18111	0	0	1.1	4.18111	0	0	1.2	4.14213
	4.13034	0	0	4	4.13034	0	0	4.1	4.13034	0	0	4.2	4.14482	0	0	3	4.14482	0	0	3.1	4.14482	0	0	3.2	4.16157	0	0	2	4.16157	0	0	2.1	4.16157	0	0	2.2	4.1826	0	0	1	4.1826	0	0	1.1	4.1826	0	0	1.2	4.14339
	4.13183	0	0	4	4.13183	0	0	4.1	4.13183	0	0	4.2	4.14602	0	0	3	4.14602	0	0	3.1	4.14602	0	0	3.2	4.16278	0	0	2	4.16278	0	0	2.1	4.16278	0	0	2.2	4.1838	0	0	1	4.1838	0	0	1.1	4.1838	0	0	1.2	4.14465
	4.13303	0	0	4	4.13303	0	0	4.1	4.13303	0	0	4.2	4.15053	0	0	3	4.15053	0	0	3.1	4.15053	0	0	3.2	4.16729	0	0	2	4.16729	0	0	2.1	4.16729	0	0	2.2	4.18831	0	0	1	4.18831	0	0	1.1	4.18831	0	0	1.2	4.14585
	4.13754	0	0	4	4.13754	0	0	4.1	4.13754	0	0	4.2	4.15202	0	0	3	4.15202	0	0	3.1	4.15202	0	0	3.2	4.16877	0	0	2	4.16877	0	0	2.1	4.16877	0	0	2.2	4.1898	0	0	1	4.1898	0	0	1.1	4.1898	0	0	1.2	4.15036
	4.13903	0	0	4	4.13903	0	0	4.1	4.13903	0	0	4.2	4.1535	0	0	3	4.1535	0	0	3.1	4.1535	0	0	3.2	4.16998	0	0	2	4.16998	0	0	2.1	4.16998	0	0	2.2	4.191	0	0	1	4.191	0	0	1.1	4.191	0	0	1.2	4.15185
	4.14051	0	0	4	4.14051	0	0	4.1	4.14051	0	0	4.2	4.15471	0	0	3	4.15471	0	0	3.1	4.15471	0	0	3.2	4.17449	0	0	2	4.17449	0	0	2.1	4.17449	0	0	2.2	4.19551	0	0	1	4.19551	0	0	1.1	4.19551	0	0	1.2	4.15305
	4.14172	0	0	4	4.14172	0	0	4.1	4.14172	0	0	4.2	4.15922	0	0	3	4.15922	0	0	3.1	4.15922	0	0	3.2	4.17597	0	0	2	4.17597	0	0	2.1	4.17597	0	0	2.2	4.197	0	0	1	4.197	0	0	1.1	4.197	0	0	1.2	4.15756
	4.14623	0	0	4	4.14623	0	0	4.1	4.14623	0	0	4.2	4.16061	0	0	3	4.16061	0	0	3.1	4.16061	0	0	3.2	4.17718	0	0	2	4.17718	0	0	2.1	4.17718	0	0	2.2	4.19835	0	0	1	4.19835	0	0	1.1	4.19835	0	0	1.2	4.15905
	4.14802	0	0	4	4.14802	0	0	4.1	4.14802	0	0	4.2	4.16205	0	0	3	4.16205	0	0	3.1	4.16205	0	0	3.2	4.18179	0	0	2	4.18179	0	0	2.1	4.18179	0	0	2.2	4.19955	0	0	1	4.19955	0	0	1.1	4.19955	0	0	1.2	4.16053
	4.15253	0	0	4	4.15253	0	0	4.1	4.15253	0	0	4.2	4.16326	0	0	3	4.16326	0	0	3.1	4.16326	0	0	3.2	4.18328	0	0	2	4.18328	0	0	2.1	4.18328	0	0	2.2	4.20406	0	0	1	4.20406	0	0	1.1	4.20406	0	0	1.2	4.16174
	4.15401	0	0	4	4.15401	0	0	4.1	4.15401	0	0	4.2	4.16777	0	0	3	4.16777	0	0	3.1	4.16777	0	0	3.2	4.18448	0	0	2	4.18448	0	0	2.1	4.18448	0	0	2.2	4.20532	0	0	1	4.20532	0	0	1.1	4.20532	0	0	1.2	4.16648
	4.1555	0	0	4	4.1555	0	0	4.1	4.1555	0	0	4.2	4.16955	0	0	3	4.16955	0	0	3.1	4.16955	0	0	3.2	4.18899	0	0	2	4.18899	0	0	2.1	4.18899	0	0	2.2	4.20652	0	0	1	4.20652	0	0	1.1	4.20652	0	0	1.2	4.16797
	4.1567	0	0	4	4.1567	0	0	4.1	4.1567	0	0	4.2	4.17406	0	0	3	4.17406	0	0	3.1	4.17406	0	0	3.2	4.19048	0	0	2	4.19048	0	0	2.1	4.19048	0	0	2.2	4.21103	0	0	1	4.21103	0	0	1.1	4.21103	0	0	1.2	4.16947
	4.16121	0	0	4	4.16121	0	0	4.1	4.16121	0	0	4.2	4.17532	0	0	3	4.17532	0	0	3.1	4.17532	0	0	3.2	4.19189	0	0	2	4.19189	0	0	2.1	4.19189	0	0	2.2	4.21252	0	0	1	4.21252	0	0	1.1	4.21252	0	0	1.2	4.17159
	4.1627	0	0	4	4.1627	0	0	4.1	4.1627	0	0	4.2	4.1768	0	0	3	4.1768	0	0	3.1	4.1768	0	0	3.2	4.19309	0	0	2	4.19309	0	0	2.1	4.19309	0	0	2.2	4.21389	0	0	1	4.21389	0	0	1.1	4.21389	0	0	1.2	4.1761
	4.16418	0	0	4	4.16418	0	0	4.1	4.16418	0	0	4.2	4.17801	0	0	3	4.17801	0	0	3.1	4.17801	0	0	3.2	4.19783	0	0	2	4.19783	0	0	2.1	4.19783	0	0	2.2	4.2151	0	0	1	4.2151	0	0	1.1	4.2151	0	0	1.2	4.17748
	4.16539	0	0	4	4.16539	0	0	4.1	4.16539	0	0	4.2	4.18252	0	0	3	4.18252	0	0	3.1	4.18252	0	0	3.2	4.19932	0	0	2	4.19932	0	0	2.1	4.19932	0	0	2.2	4.21985	0	0	1	4.21985	0	0	1.1	4.21985	0	0	1.2	4.17897
	4.1699	0	0	4	4.1699	0	0	4.1	4.1699	0	0	4.2	4.184	0	0	3	4.184	0	0	3.1	4.184	0	0	3.2	4.2008	0	0	2	4.2008	0	0	2.1	4.2008	0	0	2.2	4.22134	0	0	1	4.22134	0	0	1.1	4.22134	0	0	1.2	4.18017
	4.17115	0	0	4	4.17115	0	0	4.1	4.17115	0	0	4.2	4.18521	0	0	3	4.18521	0	0	3.1	4.18521	0	0	3.2	4.20297	0	0	2	4.20297	0	0	2.1	4.20297	0	0	2.2	4.22282	0	0	1	4.22282	0	0	1.1	4.22282	0	0	1.2	4.18468
	4.17264	0	0	4	4.17264	0	0	4.1	4.17264	0	0	4.2	4.18972	0	0	3	4.18972	0	0	3.1	4.18972	0	0	3.2	4.20748	0	0	2	4.20748	0	0	2.1	4.20748	0	0	2.2	4.22497	0	0	1	4.22497	0	0	1.1	4.22497	0	0	1.2	4.18617
	4.17384	0	0	4	4.17384	0	0	4.1	4.17384	0	0	4.2	4.1912	0	0	3	4.1912	0	0	3.1	4.1912	0	0	3.2	4.20896	0	0	2	4.20896	0	0	2.1	4.20896	0	0	2.2	4.22948	0	0	1	4.22948	0	0	1.1	4.22948	0	0	1.2	4.18765
	4.17835	0	0	4	4.17835	0	0	4.1	4.17835	0	0	4.2	4.19246	0	0	3	4.19246	0	0	3.1	4.19246	0	0	3.2	4.21045	0	0	2	4.21045	0	0	2.1	4.21045	0	0	2.2	4.23097	0	0	1	4.23097	0	0	1.1	4.23097	0	0	1.2	4.18886
	4.17967	0	0	4	4.17967	0	0	4.1	4.17967	0	0	4.2	4.19366	0	0	3	4.19366	0	0	3.1	4.19366	0	0	3.2	4.21165	0	0	2	4.21165	0	0	2.1	4.21165	0	0	2.2	4.23245	0	0	1	4.23245	0	0	1.1	4.23245	0	0	1.2	4.19337
	4.18088	0	0	4	4.18088	0	0	4.1	4.18088	0	0	4.2	4.19817	0	0	3	4.19817	0	0	3.1	4.19817	0	0	3.2	4.21616	0	0	2	4.21616	0	0	2.1	4.21616	0	0	2.2	4.23366	0	0	1	4.23366	0	0	1.1	4.23366	0	0	1.2	4.19485
	4.18539	0	0	4	4.18539	0	0	4.1	4.18539	0	0	4.2	4.19966	0	0	3	4.19966	0	0	3.1	4.19966	0	0	3.2	4.21765	0	0	2	4.21765	0	0	2.1	4.21765	0	0	2.2	4.23817	0	0	1	4.23817	0	0	1.1	4.23817	0	0	1.2	4.19634
	4.18664	0	0	4	4.18664	0	0	4.1	4.18664	0	0	4.2	4.20115	0	0	3	4.20115	0	0	3.1	4.20115	0	0	3.2	4.21907	0	0	2	4.21907	0	0	2.1	4.21907	0	0	2.2	4.24078	0	0	1	4.24078	0	0	1.1	4.24078	0	0	1.2	4.19754
	4.1879	0	0	4	4.1879	0	0	4.1	4.1879	0	0	4.2	4.20235	0	0	3	4.20235	0	0	3.1	4.20235	0	0	3.2	4.22027	0	0	2	4.22027	0	0	2.1	4.22027	0	0	2.2	4.24198	0	0	1	4.24198	0	0	1.1	4.24198	0	0	1.2	4.20205
	4.1891	0	0	4	4.1891	0	0	4.1	4.1891	12745.6	0.000105973	4.20011	4.20686	0	0	3	4.20686	0	0	3.1	4.20686	0	0	3.2	4.22478	0	0	2	4.22478	0	0	2.1	4.22478	0	0	2.2	4.24649	0	0	1	4.24649	0	0	1.1	4.24649	0	0	1.2	4.20354
	4.19361	0	0	4	4.19361	0	0	4.1	4.19361	0	0	4.2	4.20812	0	0	3	4.20812	0	0	3.1	4.20812	0	0	3.2	4.22627	0	0	2	4.22627	0	0	2.1	4.22627	0	0	2.2	4.24797	0	0	1	4.24797	0	0	1.1	4.24797	0	0	1.2	4.20502
	4.1951	0	0	4	4.1951	0	0	4.1	4.1951	0	0	4.2	4.2096	0	0	3	4.2096	0	0	3.1	4.2096	0	0	3.2	4.22775	0	0	2	4.22775	0	0	2.1	4.22775	0	0	2.2	4.24946	0	0	1	4.24946	0	0	1.1	4.24946	0	0	1.2	4.20623
	4.1963	0	0	4	4.1963	0	0	4.1	4.1963	10448	8.687e-05	4.20009	4.21081	0	0	3	4.21081	0	0	3.1	4.21081	0	0	3.2	4.22896	0	0	2	4.22896	0	0	2.1	4.22896	0	0	2.2	4.25067	0	0	1	4.25067	0	0	1.1	4.25067	0	0	1.2	4.21073
	4.20081	0	0	4	4.20081	0	0	4.1	4.20081	0	0	4.2	4.21532	0	0	3	4.21532	0	0	3.1	4.21532	0	0	3.2	4.23346	0	0	2	4.23346	0	0	2.1	4.23346	0	0	2.2	4.25518	0	0	1	4.25518	0	0	1.1	4.25518	0	0	1.2	4.21199
	4.2023	0	0	4	4.2023	0	0	4.1	4.2023	0	0	4.2	4.2168	0	0	3	4.2168	0	0	3.1	4.2168	0	0	3.2	4.23495	0	0	2	4.23495	0	0	2.1	4.23495	0	0	2.2	4.25666	0	0	1	4.25666	0	0	1.1	4.25666	0	0	1.2	4.21336
	4.20378	0	0	4	4.20378	0	0	4.1	4.20378	0	0	4.2	4.21829	0	0	3	4.21829	0	0	3.1	4.21829	0	0	3.2	4.23644	0	0	2	4.23644	0	0	2.1	4.23644	0	0	2.2	4.25815	0	0	1	4.25815	0	0	1.1	4.25815	0	0	1.2	4.21457
	4.20499	0	0	4	4.20499	0	0	4.1	4.20499	0	0	4.2	4.21949	0	0	3	4.21949	0	0	3.1	4.21949	0	0	3.2	4.23764	0	0	2	4.23764	0	0	2.1	4.23764	0	0	2.2	4.25935	0	0	1	4.25935	0	0	1.1	4.25935	0	0	1.2	4.21907
	4.2095	0	0	4	4.2095	0	0	4.1	4.2095	0	0	4.2	4.224	0	0	3	4.224	0	0	3.1	4.224	0	0	3.2	4.24215	0	0	2	4.24215	0	0	2.1	4.24215	0	0	2.2	4.26386	0	0	1	4.26386	0	0	1.1	4.26386	0	0	1.2	4.22056
	4.21075	0	0	4	4.21075	0	0	4.1	4.21075	0	0	4.2	4.22549	0	0	3	4.22549	0	0	3.1	4.22549	0	0	3.2	4.24364	0	0	2	4.24364	0	0	2.1	4.24364	0	0	2.2	4.26535	0	0	1	4.26535	0	0	1.1	4.26535	0	0	1.2	4.22177
	4.21224	0	0	4	4.21224	0	0	4.1	4.21224	0	0	4.2	4.22675	0	0	3	4.22675	0	0	3.1	4.22675	0	0	3.2	4.24484	0	0	2	4.24484	0	0	2.1	4.24484	0	0	2.2	4.26683	0	0	1	4.26683	0	0	1.1	4.26683	0	0	1.2	4.22627
	4.21345	0	0	4	4.21345	0	0	4.1	4.21345	0	0	4.2	4.22795	0	0	3	4.22795	0	0	3.1	4.22795	0	0	3.2	4.24935	0	0	2	4.24935	0	0	2.1	4.24935	0	0	2.2	4.26804	0	0	1	4.26804	0	0	1.1	4.26804	0	0	1.2	4.22776
	4.21795	0	0	4	4.21795	0	0	4.1	4.21795	0	0	4.2	4.23246	0	0	3	4.23246	0	0	3.1	4.23246	0	0	3.2	4.25072	0	0	2	4.25072	0	0	2.1	4.25072	0	0	2.2	4.27255	0	0	1	4.27255	0	0	1.1	4.27255	0	0	1.2	4.22902
	4.21944	0	0	4	4.21944	0	0	4.1	4.21944	0	0	4.2	4.23395	0	0	3	4.23395	0	0	3.1	4.23395	0	0	3.2	4.25193	0	0	2	4.25193	0	0	2.1	4.25193	0	0	2.2	4.27403	0	0	1	4.27403	0	0	1.1	4.27403	0	0	1.2	4.23022
	4.22064	0	0	4	4.22064	0	0	4.1	4.22064	0	0	4.2	4.23543	0	0	3	4.23543	0	0	3.1	4.23543	0	0	3.2	4.25666	0	0	2	4.25666	0	0	2.1	4.25666	0	0	2.2	4.27524	0	0	1	4.27524	0	0	1.1	4.27524	0	0	1.2	4.23473
	4.22538	0	0	4	4.22538	0	0	4.1	4.22538	0	0	4.2	4.23664	0	0	3	4.23664	0	0	3.1	4.23664	0	0	3.2	4.25815	0	0	2	4.25815	0	0	2.1	4.25815	0	0	2.2	4.27975	0	0	1	4.27975	0	0	1.1	4.27975	0	0	1.2	4.23622
	4.22687	0	0	4	4.22687	0	0	4.1	4.22687	0	0	4.2	4.24115	0	0	3	4.24115	0	0	3.1	4.24115	0	0	3.2	4.25935	0	0	2	4.25935	0	0	2.1	4.25935	0	0	2.2	4.28123	0	0	1	4.28123	0	0	1.1	4.28123	0	0	1.2	4.2377
	4.22835	0	0	4	4.22835	0	0	4.1	4.22835	0	0	4.2	4.24241	0	0	3	4.24241	0	0	3.1	4.24241	0	0	3.2	4.26386	0	0	2	4.26386	0	0	2.1	4.26386	0	0	2.2	4.28272	0	0	1	4.28272	0	0	1.1	4.28272	0	0	1.2	4.23891
	4.23049	0	0	4	4.23049	0	0	4.1	4.23049	0	0	4.2	4.24361	0	0	3	4.24361	0	0	3.1	4.24361	0	0	3.2	4.26535	0	0	2	4.26535	0	0	2.1	4.26535	0	0	2.2	4.28392	0	0	1	4.28392	0	0	1.1	4.28392	0	0	1.2	4.24342
	4.23523	0	0	4	4.23523	0	0	4.1	4.23523	0	0	4.2	4.24812	0	0	3	4.24812	0	0	3.1	4.24812	0	0	3.2	4.26684	0	0	2	4.26684	0	0	2.1	4.26684	0	0	2.2	4.28843	0	0	1	4.28843	0	0	1.1	4.28843	0	0	1.2	4.2449
	4.23764	0	0	4	4.23764	0	0	4.1	4.23764	0	0	4.2	4.24942	0	0	3	4.24942	0	0	3.1	4.24942	0	0	3.2	4.26805	0	0	2	4.26805	0	0	2.1	4.26805	0	0	2.2	4.28992	0	0	1	4.28992	0	0	1.1	4.28992	0	0	1.2	4.24639
	4.23884	0	0	4	4.23884	0	0	4.1	4.23884	0	0	4.2	4.25062	0	0	3	4.25062	0	0	3.1	4.25062	0	0	3.2	4.27255	0	0	2	4.27255	0	0	2.1	4.27255	0	0	2.2	4.2914	0	0	1	4.2914	0	0	1.1	4.2914	0	0	1.2	4.24759
	4.24358	0	0	4	4.24358	0	0	4.1	4.24358	0	0	4.2	4.25513	0	0	3	4.25513	0	0	3.1	4.25513	0	0	3.2	4.27404	0	0	2	4.27404	0	0	2.1	4.27404	0	0	2.2	4.29261	0	0	1	4.29261	0	0	1.1	4.29261	0	0	1.2	4.2521
	4.24507	0	0	4	4.24507	0	0	4.1	4.24507	0	0	4.2	4.25662	0	0	3	4.25662	0	0	3.1	4.25662	0	0	3.2	4.27525	0	0	2	4.27525	0	0	2.1	4.27525	0	0	2.2	4.29712	0	0	1	4.29712	0	0	1.1	4.29712	0	0	1.2	4.2534
	4.24633	0	0	4	4.24633	0	0	4.1	4.24633	0	0	4.2	4.25811	0	0	3	4.25811	0	0	3.1	4.25811	0	0	3.2	4.27976	0	0	2	4.27976	0	0	2.1	4.27976	0	0	2.2	4.29861	0	0	1	4.29861	0	0	1.1	4.29861	0	0	1.2	4.25489
	4.2485	0	0	4	4.2485	0	0	4.1	4.2485	0	0	4.2	4.26025	0	0	3	4.26025	0	0	3.1	4.26025	0	0	3.2	4.2811	0	0	2	4.2811	0	0	2.1	4.2811	0	0	2.2	4.30009	0	0	1	4.30009	0	0	1.1	4.30009	0	0	1.2	4.25609
	4.25301	0	0	4	4.25301	0	0	4.1	4.25301	0	0	4.2	4.26475	0	0	3	4.26475	0	0	3.1	4.26475	0	0	3.2	4.28259	0	0	2	4.28259	0	0	2.1	4.28259	0	0	2.2	4.3013	0	0	1	4.3013	0	0	1.1	4.3013	0	0	1.2	4.2606
	4.25449	0	0	4	4.25449	0	0	4.1	4.25449	0	0	4.2	4.26737	0	0	3	4.26737	0	0	3.1	4.26737	0	0	3.2	4.28379	0	0	2	4.28379	0	0	2.1	4.28379	0	0	2.2	4.30581	0	0	1	4.30581	0	0	1.1	4.30581	0	0	1.2	4.26208
	4.25575	0	0	4	4.25575	0	0	4.1	4.25575	0	0	4.2	4.26857	0	0	3	4.26857	0	0	3.1	4.26857	0	0	3.2	4.2883	0	0	2	4.2883	0	0	2.1	4.2883	0	0	2.2	4.30706	0	0	1	4.30706	0	0	1.1	4.30706	0	0	1.2	4.26357
	4.25695	0	0	4	4.25695	0	0	4.1	4.25695	0	0	4.2	4.27308	0	0	3	4.27308	0	0	3.1	4.27308	0	0	3.2	4.28979	0	0	2	4.28979	0	0	2.1	4.28979	0	0	2.2	4.30827	0	0	1	4.30827	0	0	1.1	4.30827	0	0	1.2	4.26478
	4.26157	0	0	4	4.26157	0	0	4.1	4.26157	0	0	4.2	4.27457	0	0	3	4.27457	0	0	3.1	4.27457	0	0	3.2	4.29099	0	0	2	4.29099	0	0	2.1	4.29099	0	0	2.2	4.31301	0	0	1	4.31301	0	0	1.1	4.31301	0	0	1.2	4.26928
	4.26306	0	0	4	4.26306	0	0	4.1	4.26306	0	0	4.2	4.27577	0	0	3	4.27577	0	0	3.1	4.27577	0	0	3.2	4.2955	0	0	2	4.2955	0	0	2.1	4.2955	0	0	2.2	4.31474	0	0	1	4.31474	0	0	1.1	4.31474	0	0	1.2	4.27077
	4.26427	0	0	4	4.26427	0	0	4.1	4.26427	0	0	4.2	4.28028	0	0	3	4.28028	0	0	3.1	4.28028	0	0	3.2	4.29676	0	0	2	4.29676	0	0	2.1	4.29676	0	0	2.2	4.31924	0	0	1	4.31924	0	0	1.1	4.31924	0	0	1.2	4.27226
	4.26878	0	0	4	4.26878	0	0	4.1	4.26878	0	0	4.2	4.28177	0	0	3	4.28177	0	0	3.1	4.28177	0	0	3.2	4.29825	0	0	2	4.29825	0	0	2.1	4.29825	0	0	2.2	4.32073	0	0	1	4.32073	0	0	1.1	4.32073	0	0	1.2	4.27346
	4.27026	0	0	4	4.27026	0	0	4.1	4.27026	0	0	4.2	4.28306	0	0	3	4.28306	0	0	3.1	4.28306	0	0	3.2	4.29945	0	0	2	4.29945	0	0	2.1	4.29945	0	0	2.2	4.32221	0	0	1	4.32221	0	0	1.1	4.32221	0	0	1.2	4.2782
	4.27175	0	0	4	4.27175	0	0	4.1	4.27175	0	0	4.2	4.28427	0	0	3	4.28427	0	0	3.1	4.28427	0	0	3.2	4.30396	0	0	2	4.30396	0	0	2.1	4.30396	0	0	2.2	4.32342	0	0	1	4.32342	0	0	1.1	4.32342	0	0	1.2	4.27968
	4.27295	0	0	4	4.27295	0	0	4.1	4.27295	0	0	4.2	4.28878	0	0	3	4.28878	0	0	3.1	4.28878	0	0	3.2	4.30544	0	0	2	4.30544	0	0	2.1	4.30544	0	0	2.2	4.32793	0	0	1	4.32793	0	0	1.1	4.32793	0	0	1.2	4.28094
	4.27746	0	0	4	4.27746	0	0	4.1	4.27746	0	0	4.2	4.29026	0	0	3	4.29026	0	0	3.1	4.29026	0	0	3.2	4.30665	0	0	2	4.30665	0	0	2.1	4.30665	0	0	2.2	4.32969	0	0	1	4.32969	0	0	1.1	4.32969	0	0	1.2	4.28306
	4.27872	0	0	4	4.27872	0	0	4.1	4.27872	0	0	4.2	4.29175	0	0	3	4.29175	0	0	3.1	4.29175	0	0	3.2	4.31139	0	0	2	4.31139	0	0	2.1	4.31139	0	0	2.2	4.3342	0	0	1	4.3342	0	0	1.1	4.3342	0	0	1.2	4.28757
	4.27993	0	0	4	4.27993	0	0	4.1	4.27993	0	0	4.2	4.29295	0	0	3	4.29295	0	0	3.1	4.29295	0	0	3.2	4.31287	0	0	2	4.31287	0	0	2.1	4.31287	0	0	2.2	4.33558	0	0	1	4.33558	0	0	1.1	4.33558	0	0	1.2	4.2889
	4.28443	0	0	4	4.28443	0	0	4.1	4.28443	0	0	4.2	4.29746	0	0	3	4.29746	0	0	3.1	4.29746	0	0	3.2	4.31436	0	0	2	4.31436	0	0	2.1	4.31436	0	0	2.2	4.33707	0	0	1	4.33707	0	0	1.1	4.33707	0	0	1.2	4.29039
	4.28592	0	0	4	4.28592	0	0	4.1	4.28592	0	0	4.2	4.29895	0	0	3	4.29895	0	0	3.1	4.29895	0	0	3.2	4.31652	0	0	2	4.31652	0	0	2.1	4.31652	0	0	2.2	4.33827	0	0	1	4.33827	0	0	1.1	4.33827	0	0	1.2	4.29159
	4.28718	0	0	4	4.28718	0	0	4.1	4.28718	0	0	4.2	4.30043	0	0	3	4.30043	0	0	3.1	4.30043	0	0	3.2	4.32102	0	0	2	4.32102	0	0	2.1	4.32102	0	0	2.2	4.34289	0	0	1	4.34289	0	0	1.1	4.34289	0	0	1.2	4.2961
	4.28838	0	0	4	4.28838	0	0	4.1	4.28838	0	0	4.2	4.30164	0	0	3	4.30164	0	0	3.1	4.30164	0	0	3.2	4.32228	0	0	2	4.32228	0	0	2.1	4.32228	0	0	2.2	4.34437	0	0	1	4.34437	0	0	1.1	4.34437	0	0	1.2	4.29759
	4.29289	0	0	4	4.29289	0	0	4.1	4.29289	0	0	4.2	4.30615	0	0	3	4.30615	0	0	3.1	4.30615	0	0	3.2	4.32377	0	0	2	4.32377	0	0	2.1	4.32377	0	0	2.2	4.34586	0	0	1	4.34586	0	0	1.1	4.34586	0	0	1.2	4.29907
	4.29415	0	0	4	4.29415	0	0	4.1	4.29415	0	0	4.2	4.30763	0	0	3	4.30763	0	0	3.1	4.30763	0	0	3.2	4.32497	0	0	2	4.32497	0	0	2.1	4.32497	0	0	2.2	4.34706	0	0	1	4.34706	0	0	1.1	4.34706	0	0	1.2	4.30028
	4.29563	0	0	4	4.29563	0	0	4.1	4.29563	0	0	4.2	4.30912	0	0	3	4.30912	0	0	3.1	4.30912	0	0	3.2	4.32948	0	0	2	4.32948	0	0	2.1	4.32948	0	0	2.2	4.35157	0	0	1	4.35157	0	0	1.1	4.35157	0	0	1.2	4.30479
	4.29684	0	0	4	4.29684	0	0	4.1	4.29684	0	0	4.2	4.31033	0	0	3	4.31033	0	0	3.1	4.31033	0	0	3.2	4.33074	0	0	2	4.33074	0	0	2.1	4.33074	0	0	2.2	4.35353	0	0	1	4.35353	0	0	1.1	4.35353	0	0	1.2	4.30604
	4.30135	0	0	4	4.30135	0	0	4.1	4.30135	0	0	4.2	4.31484	0	0	3	4.31484	0	0	3.1	4.31484	0	0	3.2	4.33194	0	0	2	4.33194	0	0	2.1	4.33194	0	0	2.2	4.35804	0	0	1	4.35804	0	0	1.1	4.35804	0	0	1.2	4.30725
	4.30283	0	0	4	4.30283	0	0	4.1	4.30283	0	0	4.2	4.31609	0	0	3	4.31609	0	0	3.1	4.31609	0	0	3.2	4.33645	0	0	2	4.33645	0	0	2.1	4.33645	0	0	2.2	4.35953	0	0	1	4.35953	0	0	1.1	4.35953	0	0	1.2	4.31176
	4.30404	0	0	4	4.30404	0	0	4.1	4.30404	0	0	4.2	4.31758	0	0	3	4.31758	0	0	3.1	4.31758	0	0	3.2	4.33794	0	0	2	4.33794	0	0	2.1	4.33794	0	0	2.2	4.36101	0	0	1	4.36101	0	0	1.1	4.36101	0	0	1.2	4.31324
	4.30855	0	0	4	4.30855	0	0	4.1	4.30855	0	0	4.2	4.31879	0	0	3	4.31879	0	0	3.1	4.31879	0	0	3.2	4.33919	0	0	2	4.33919	0	0	2.1	4.33919	0	0	2.2	4.36222	0	0	1	4.36222	0	0	1.1	4.36222	0	0	1.2	4.3146
	4.31003	0	0	4	4.31003	0	0	4.1	4.31003	0	0	4.2	4.32329	0	0	3	4.32329	0	0	3.1	4.32329	0	0	3.2	4.3404	0	0	2	4.3404	0	0	2.1	4.3404	0	0	2.2	4.36673	0	0	1	4.36673	0	0	1.1	4.36673	0	0	1.2	4.3158
	4.31152	0	0	4	4.31152	0	0	4.1	4.31152	0	0	4.2	4.32472	0	0	3	4.32472	0	0	3.1	4.32472	0	0	3.2	4.34502	0	0	2	4.34502	0	0	2.1	4.34502	0	0	2.2	4.36798	0	0	1	4.36798	0	0	1.1	4.36798	0	0	1.2	4.32054
	4.31272	0	0	4	4.31272	0	0	4.1	4.31272	0	0	4.2	4.32615	0	0	3	4.32615	0	0	3.1	4.32615	0	0	3.2	4.34651	0	0	2	4.34651	0	0	2.1	4.34651	0	0	2.2	4.36926	0	0	1	4.36926	0	0	1.1	4.36926	0	0	1.2	4.32202
	4.31723	0	0	4	4.31723	0	0	4.1	4.31723	0	0	4.2	4.32735	0	0	3	4.32735	0	0	3.1	4.32735	0	0	3.2	4.34771	0	0	2	4.34771	0	0	2.1	4.34771	0	0	2.2	4.37047	0	0	1	4.37047	0	0	1.1	4.37047	0	0	1.2	4.32351
	4.31872	0	0	4	4.31872	0	0	4.1	4.31872	0	0	4.2	4.33186	0	0	3	4.33186	0	0	3.1	4.33186	0	0	3.2	4.35222	0	0	2	4.35222	0	0	2.1	4.35222	0	0	2.2	4.3752	0	0	1	4.3752	0	0	1.1	4.3752	0	0	1.2	4.32563
	4.31992	0	0	4	4.31992	0	0	4.1	4.31992	0	0	4.2	4.33312	0	0	3	4.33312	0	0	3.1	4.33312	0	0	3.2	4.35371	0	0	2	4.35371	0	0	2.1	4.35371	0	0	2.2	4.37649	0	0	1	4.37649	0	0	1.1	4.37649	0	0	1.2	4.33014
	4.32443	0	0	4	4.32443	0	0	4.1	4.32443	0	0	4.2	4.33432	0	0	3	4.33432	0	0	3.1	4.33432	0	0	3.2	4.35512	0	0	2	4.35512	0	0	2.1	4.35512	0	0	2.2	4.37799	0	0	1	4.37799	0	0	1.1	4.37799	0	0	1.2	4.33162
	4.32592	0	0	4	4.32592	0	0	4.1	4.32592	0	0	4.2	4.33883	0	0	3	4.33883	0	0	3.1	4.33883	0	0	3.2	4.35633	0	0	2	4.35633	0	0	2.1	4.35633	0	0	2.2	4.38013	0	0	1	4.38013	0	0	1.1	4.38013	0	0	1.2	4.33311
	4.32726	0	0	4	4.32726	0	0	4.1	4.32726	0	0	4.2	4.34032	0	0	3	4.34032	0	0	3.1	4.34032	0	0	3.2	4.36083	0	0	2	4.36083	0	0	2.1	4.36083	0	0	2.2	4.38464	0	0	1	4.38464	0	0	1.1	4.38464	0	0	1.2	4.33431
	4.32847	0	0	4	4.32847	0	0	4.1	4.32847	0	0	4.2	4.3418	0	0	3	4.3418	0	0	3.1	4.3418	0	0	3.2	4.36345	0	0	2	4.36345	0	0	2.1	4.36345	0	0	2.2	4.38613	0	0	1	4.38613	0	0	1.1	4.38613	0	0	1.2	4.33882
	4.33297	0	0	4	4.33297	0	0	4.1	4.33297	0	0	4.2	4.34301	0	0	3	4.34301	0	0	3.1	4.34301	0	0	3.2	4.36465	0	0	2	4.36465	0	0	2.1	4.36465	0	0	2.2	4.38761	0	0	1	4.38761	0	0	1.1	4.38761	0	0	1.2	4.34019
	4.33423	0	0	4	4.33423	0	0	4.1	4.33423	0	0	4.2	4.34764	0	0	3	4.34764	0	0	3.1	4.34764	0	0	3.2	4.36916	0	0	2	4.36916	0	0	2.1	4.36916	0	0	2.2	4.38882	0	0	1	4.38882	0	0	1.1	4.38882	0	0	1.2	4.34139
	4.33572	0	0	4	4.33572	0	0	4.1	4.33572	0	0	4.2	4.34911	0	0	3	4.34911	0	0	3.1	4.34911	0	0	3.2	4.37065	0	0	2	4.37065	0	0	2.1	4.37065	0	0	2.2	4.39356	0	0	1	4.39356	0	0	1.1	4.39356	0	0	1.2	4.3459
	4.33692	0	0	4	4.33692	0	0	4.1	4.33692	0	0	4.2	4.35032	0	0	3	4.35032	0	0	3.1	4.35032	0	0	3.2	4.37213	0	0	2	4.37213	0	0	2.1	4.37213	0	0	2.2	4.39481	0	0	1	4.39481	0	0	1.1	4.39481	0	0	1.2	4.34739
	4.34143	0	0	4	4.34143	0	0	4.1	4.34143	0	0	4.2	4.35483	0	0	3	4.35483	0	0	3.1	4.35483	0	0	3.2	4.37334	0	0	2	4.37334	0	0	2.1	4.37334	0	0	2.2	4.3963	0	0	1	4.3963	0	0	1.1	4.3963	0	0	1.2	4.34859
	4.34269	0	0	4	4.34269	0	0	4.1	4.34269	0	0	4.2	4.35631	0	0	3	4.35631	0	0	3.1	4.35631	0	0	3.2	4.37785	0	0	2	4.37785	0	0	2.1	4.37785	0	0	2.2	4.39845	0	0	1	4.39845	0	0	1.1	4.39845	0	0	1.2	4.3531
	4.34418	0	0	4	4.34418	0	0	4.1	4.34418	0	0	4.2	4.35757	0	0	3	4.35757	0	0	3.1	4.35757	0	0	3.2	4.3791	0	0	2	4.3791	0	0	2.1	4.3791	0	0	2.2	4.40296	0	0	1	4.40296	0	0	1.1	4.40296	0	0	1.2	4.35459
	4.34539	0	0	4	4.34539	0	0	4.1	4.34539	0	0	4.2	4.35877	0	0	3	4.35877	0	0	3.1	4.35877	0	0	3.2	4.38043	0	0	2	4.38043	0	0	2.1	4.38043	0	0	2.2	4.40421	0	0	1	4.40421	0	0	1.1	4.40421	0	0	1.2	4.35607
	4.34989	0	0	4	4.34989	0	0	4.1	4.34989	0	0	4.2	4.36328	0	0	3	4.36328	0	0	3.1	4.36328	0	0	3.2	4.38164	0	0	2	4.38164	0	0	2.1	4.38164	0	0	2.2	4.40542	0	0	1	4.40542	0	0	1.1	4.40542	0	0	1.2	4.35728
	4.35115	0	0	4	4.35115	0	0	4.1	4.35115	0	0	4.2	4.36588	0	0	3	4.36588	0	0	3.1	4.36588	0	0	3.2	4.38615	0	0	2	4.38615	0	0	2.1	4.38615	0	0	2.2	4.40993	0	0	1	4.40993	0	0	1.1	4.40993	0	0	1.2	4.36179
	4.35241	0	0	4	4.35241	0	0	4.1	4.35241	0	0	4.2	4.36708	0	0	3	4.36708	0	0	3.1	4.36708	0	0	3.2	4.3874	0	0	2	4.3874	0	0	2.1	4.3874	0	0	2.2	4.41118	0	0	1	4.41118	0	0	1.1	4.41118	0	0	1.2	4.36327
	4.35361	0	0	4	4.35361	0	0	4.1	4.35361	0	0	4.2	4.37159	0	0	3	4.37159	0	0	3.1	4.37159	0	0	3.2	4.38889	0	0	2	4.38889	0	0	2.1	4.38889	0	0	2.2	4.41239	0	0	1	4.41239	0	0	1.1	4.41239	0	0	1.2	4.36448
	4.35812	0	0	4	4.35812	0	0	4.1	4.35812	0	0	4.2	4.37418	0	0	3	4.37418	0	0	3.1	4.37418	0	0	3.2	4.3901	0	0	2	4.3901	0	0	2.1	4.3901	0	0	2.2	4.4169	0	0	1	4.4169	0	0	1.1	4.4169	0	0	1.2	4.36899
	4.35961	0	0	4	4.35961	0	0	4.1	4.35961	0	0	4.2	4.37539	0	0	3	4.37539	0	0	3.1	4.37539	0	0	3.2	4.39594	0	0	2	4.39594	0	0	2.1	4.39594	0	0	2.2	4.41838	0	0	1	4.41838	0	0	1.1	4.41838	0	0	1.2	4.37024
	4.36109	0	0	4	4.36109	0	0	4.1	4.36109	0	0	4.2	4.3799	0	0	3	4.3799	0	0	3.1	4.3799	0	0	3.2	4.40044	0	0	2	4.40044	0	0	2.1	4.40044	0	0	2.2	4.41987	0	0	1	4.41987	0	0	1.1	4.41987	0	0	1.2	4.37145
	4.3623	0	0	4	4.3623	0	0	4.1	4.3623	0	0	4.2	4.38138	0	0	3	4.38138	0	0	3.1	4.38138	0	0	3.2	4.40193	0	0	2	4.40193	0	0	2.1	4.40193	0	0	2.2	4.42107	0	0	1	4.42107	0	0	1.1	4.42107	0	0	1.2	4.37596
	4.36681	0	0	4	4.36681	0	0	4.1	4.36681	0	0	4.2	4.38259	0	0	3	4.38259	0	0	3.1	4.38259	23414.6	0.00019468	3.20019	4.40341	0	0	2	4.40341	0	0	2.1	4.40341	0	0	2.2	4.42558	0	0	1	4.42558	0	0	1.1	4.42558	0	0	1.2	4.37744
	4.36856	0	0	4	4.36856	0	0	4.1	4.36856	0	0	4.2	4.3871	0	0	3	4.3871	0	0	3.1	4.3871	0	0	3.2	4.40462	0	0	2	4.40462	0	0	2.1	4.40462	0	0	2.2	4.42817	0	0	1	4.42817	0	0	1.1	4.42817	0	0	1.2	4.37865
	4.37307	0	0	4	4.37307	0	0	4.1	4.37307	0	0	4.2	4.38858	0	0	3	4.38858	0	0	3.1	4.38858	0	0	3.2	4.40936	0	0	2	4.40936	0	0	2.1	4.40936	0	0	2.2	4.42965	0	0	1	4.42965	0	0	1.1	4.42965	0	0	1.2	4.38316
	4.37433	0	0	4	4.37433	0	0	4.1	4.37433	0	0	4.2	4.38984	0	0	3	4.38984	0	0	3.1	4.38984	0	0	3.2	4.41084	0	0	2	4.41084	0	0	2.1	4.41084	0	0	2.2	4.43086	0	0	1	4.43086	0	0	1.1	4.43086	0	0	1.2	4.38449
	4.37553	0	0	4	4.37553	0	0	4.1	4.37553	0	0	4.2	4.39105	0	0	3	4.39105	0	0	3.1	4.39105	0	0	3.2	4.41205	0	0	2	4.41205	0	0	2.1	4.41205	0	0	2.2	4.43536	0	0	1	4.43536	0	0	1.1	4.43536	0	0	1.2	4.38569
	4.38027	0	0	4	4.38027	0	0	4.1	4.38027	0	0	4.2	4.39556	0	0	3	4.39556	0	0	3.1	4.39556	0	0	3.2	4.41656	0	0	2	4.41656	0	0	2.1	4.41656	0	0	2.2	4.43685	0	0	1	4.43685	0	0	1.1	4.43685	0	0	1.2	4.3902
	4.38182	0	0	4	4.38182	0	0	4.1	4.38182	0	0	4.2	4.39704	0	0	3	4.39704	0	0	3.1	4.39704	0	0	3.2	4.41805	0	0	2	4.41805	0	0	2.1	4.41805	0	0	2.2	4.43834	0	0	1	4.43834	0	0	1.1	4.43834	0	0	1.2	4.39146
	4.38656	0	0	4	4.38656	0	0	4.1	4.38656	0	0	4.2	4.39853	0	0	3	4.39853	0	0	3.1	4.39853	0	0	3.2	4.41938	0	0	2	4.41938	0	0	2.1	4.41938	0	0	2.2	4.43954	0	0	1	4.43954	0	0	1.1	4.43954	0	0	1.2	4.39295
	4.38804	0	0	4	4.38804	0	0	4.1	4.38804	0	0	4.2	4.39973	0	0	3	4.39973	0	0	3.1	4.39973	0	0	3.2	4.42059	0	0	2	4.42059	0	0	2.1	4.42059	0	0	2.2	4.44405	0	0	1	4.44405	0	0	1.1	4.44405	0	0	1.2	4.39415
	4.38953	0	0	4	4.38953	0	0	4.1	4.38953	0	0	4.2	4.40424	0	0	3	4.40424	0	0	3.1	4.40424	0	0	3.2	4.42533	0	0	2	4.42533	0	0	2.1	4.42533	0	0	2.2	4.44554	0	0	1	4.44554	0	0	1.1	4.44554	0	0	1.2	4.39866
	4.39166	0	0	4	4.39166	0	0	4.1	4.39166	0	0	4.2	4.40545	0	0	3	4.40545	0	0	3.1	4.40545	0	0	3.2	4.42681	0	0	2	4.42681	0	0	2.1	4.42681	0	0	2.2	4.44702	0	0	1	4.44702	0	0	1.1	4.44702	0	0	1.2	4.40017
	4.39616	0	0	4	4.39616	0	0	4.1	4.39616	0	0	4.2	4.40995	0	0	3	4.40995	0	0	3.1	4.40995	0	0	3.2	4.42802	0	0	2	4.42802	0	0	2.1	4.42802	0	0	2.2	4.44823	0	0	1	4.44823	0	0	1.1	4.44823	0	0	1.2	4.40165
	4.39737	0	0	4	4.39737	0	0	4.1	4.39737	0	0	4.2	4.41144	0	0	3	4.41144	0	0	3.1	4.41144	0	0	3.2	4.43253	0	0	2	4.43253	0	0	2.1	4.43253	0	0	2.2	4.45274	0	0	1	4.45274	0	0	1.1	4.45274	0	0	1.2	4.40286
	4.40211	0	0	4	4.40211	0	0	4.1	4.40211	0	0	4.2	4.41293	0	0	3	4.41293	0	0	3.1	4.41293	0	0	3.2	4.43401	0	0	2	4.43401	0	0	2.1	4.43401	0	0	2.2	4.45422	0	0	1	4.45422	0	0	1.1	4.45422	0	0	1.2	4.40737
	4.40337	0	0	4	4.40337	0	0	4.1	4.40337	0	0	4.2	4.41414	0	0	3	4.41414	0	0	3.1	4.41414	0	0	3.2	4.43522	0	0	2	4.43522	0	0	2.1	4.43522	0	0	2.2	4.45571	0	0	1	4.45571	0	0	1.1	4.45571	0	0	1.2	4.40885
	4.40457	0	0	4	4.40457	0	0	4.1	4.40457	0	0	4.2	4.41887	0	0	3	4.41887	0	0	3.1	4.41887	0	0	3.2	4.43973	0	0	2	4.43973	0	0	2.1	4.43973	0	0	2.2	4.45691	0	0	1	4.45691	0	0	1.1	4.45691	0	0	1.2	4.41034
	4.40908	0	0	4	4.40908	0	0	4.1	4.40908	0	0	4.2	4.42036	0	0	3	4.42036	0	0	3.1	4.42036	0	0	3.2	4.44098	0	0	2	4.44098	0	0	2.1	4.44098	0	0	2.2	4.46142	0	0	1	4.46142	0	0	1.1	4.46142	0	0	1.2	4.41154
	4.41057	0	0	4	4.41057	0	0	4.1	4.41057	0	0	4.2	4.42162	0	0	3	4.42162	0	0	3.1	4.42162	0	0	3.2	4.44247	0	0	2	4.44247	0	0	2.1	4.44247	0	0	2.2	4.46291	0	0	1	4.46291	0	0	1.1	4.46291	0	0	1.2	4.41605
	4.41177	0	0	4	4.41177	0	0	4.1	4.41177	0	0	4.2	4.42375	0	0	3	4.42375	0	0	3.1	4.42375	0	0	3.2	4.44367	0	0	2	4.44367	0	0	2.1	4.44367	0	0	2.2	4.46439	0	0	1	4.46439	0	0	1.1	4.46439	0	0	1.2	4.41731
	4.41628	0	0	4	4.41628	0	0	4.1	4.41628	0	0	4.2	4.42826	0	0	3	4.42826	0	0	3.1	4.42826	0	0	3.2	4.44818	0	0	2	4.44818	0	0	2.1	4.44818	0	0	2.2	4.4656	0	0	1	4.4656	0	0	1.1	4.4656	0	0	1.2	4.4188
	4.41777	0	0	4	4.41777	0	0	4.1	4.41777	0	0	4.2	4.43088	0	0	3	4.43088	0	0	3.1	4.43088	0	0	3.2	4.44967	0	0	2	4.44967	0	0	2.1	4.44967	0	0	2.2	4.47011	0	0	1	4.47011	0	0	1.1	4.47011	0	0	1.2	4.42
	4.41926	0	0	4	4.41926	0	0	4.1	4.41926	0	0	4.2	4.43214	0	0	3	4.43214	0	0	3.1	4.43214	0	0	3.2	4.45115	0	0	2	4.45115	0	0	2.1	4.45115	0	0	2.2	4.47159	0	0	1	4.47159	0	0	1.1	4.47159	0	0	1.2	4.42451
	4.42046	0	0	4	4.42046	0	0	4.1	4.42046	0	0	4.2	4.43334	0	0	3	4.43334	0	0	3.1	4.43334	0	0	3.2	4.45236	0	0	2	4.45236	0	0	2.1	4.45236	0	0	2.2	4.4728	0	0	1	4.4728	0	0	1.1	4.4728	0	0	1.2	4.426
	4.42497	0	0	4	4.42497	0	0	4.1	4.42497	0	0	4.2	4.43785	0	0	3	4.43785	0	0	3.1	4.43785	0	0	3.2	4.45687	0	0	2	4.45687	0	0	2.1	4.45687	0	0	2.2	4.47731	0	0	1	4.47731	0	0	1.1	4.47731	0	0	1.2	4.42749
	4.42623	0	0	4	4.42623	0	0	4.1	4.42623	0	0	4.2	4.43934	0	0	3	4.43934	0	0	3.1	4.43934	0	0	3.2	4.45812	0	0	2	4.45812	0	0	2.1	4.45812	0	0	2.2	4.47879	0	0	1	4.47879	0	0	1.1	4.47879	0	0	1.2	4.42869
	4.42743	0	0	4	4.42743	0	0	4.1	4.42743	0	0	4.2	4.44082	0	0	3	4.44082	0	0	3.1	4.44082	0	0	3.2	4.45961	0	0	2	4.45961	0	0	2.1	4.45961	0	0	2.2	4.48	0	0	1	4.48	0	0	1.1	4.48	0	0	1.2	4.4332
	4.43194	0	0	4	4.43194	0	0	4.1	4.43194	0	0	4.2	4.44203	0	0	3	4.44203	0	0	3.1	4.44203	0	0	3.2	4.46081	0	0	2	4.46081	0	0	2.1	4.46081	0	0	2.2	4.48451	0	0	1	4.48451	0	0	1.1	4.48451	0	0	1.2	4.43469
[truncated: 9,884 more rows]
[truncated: 10 more columns]

## Sheet: Fig. 1e
Fig. 1e
Bar plots showing the binding of Fc-pST3Gal1 variants to mammalian cell lines
All Fc-fusion protein binding was measured based on AF647 (goat anti-human IgG Fc gamma), MALII lectin based on AF488 (direct conjugation) and PNA based on AF594 (direct conjugation). MALII and PNA were mixed and measured simultaneously.
Fc-fusion proteins	Mock		PS1		H302A		Dead		CBM40			Lectins	No lectin (AF488)		No lectin (AF594)		MALII		PNA
Cell line +/- sialidase (sia)	HEK-sia	HEK+sia	HEK-sia	HEK+sia	HEK-sia	HEK+sia	HEK-sia	HEK+sia	HEK-sia	HEK+sia		Cell line +/- sialidase (sia)	HEK-sia	HEK+sia	HEK-sia	HEK+sia	HEK-sia	HEK+sia	HEK-sia	HEK+sia
GMFI (1st)	425	460	407	2024	9262	977	359	446	1488	558		GMFI (1st)	103	102	102	103	686	159	183	1907
GMFI (2nd)	470	539	550	4135	11184	2060	384	523	1659	532		GMFI (2nd)	86	83	120	120	816	127	210	1903
GMFI (3rd)	425	405	416	1729	6884	830	312	402	1690	553		GMFI (3rd)	101	98	108	107	841	151	204	1562
Average	440	468	457.667	2629.33	9110	1289	351.667	457	1612.33	547.667		Average	96.6667	94.3333	110	110	781	145.667	199	1790.67
SD	21.2132	54.997	65.3928	1071.46	1758.75	548.472	29.8478	50.0067	88.8232	11.2645		SD	7.58654	8.17856	7.48331	7.25718	67.9461	13.5974	11.5758	161.7
Fc-fusion proteins	Mock		PS1		H302A		Dead		CBM40			Lectins	No lectin (AF488)		No lectin (AF594)		MALII		PNA
Cell line +/- sialidase (sia)	COLO-sia	COLO+sia	COLO-sia	COLO+sia	COLO-sia	COLO+sia	COLO-sia	COLO+sia	COLO-sia	COLO+sia		Cell line +/- sialidase (sia)	COLO-sia	COLO+sia	COLO-sia	COLO+sia	COLO-sia	COLO+sia	COLO-sia	COLO+sia
GMFI (1st)	578	512	760	1896	42875	897	465	476	1642	660		GMFI (1st)	183	143	212	214	5235	362	1105	6330
GMFI (2nd)	439	470	781	3055	47415	1277	400	388	1508	723		GMFI (2nd)	149	147	216	220	5095	465	1080	5540
GMFI (3rd)	541	383	757	2505	33482	972	410	447	1537	607		GMFI (3rd)	131	130	207	212	5016	401	1034	5099
Average	519.333	455	766	2485.33	41257.3	1048.67	425	437	1562.33	663.333		Average	154.333	140	211.667	215.333	5115.33	409.333	1073	5656.33
SD	58.7783	53.7215	10.6771	473.364	5802	164.334	28.5774	36.6151	57.5635	47.4154		SD	21.5613	7.25718	3.68179	3.39935	90.5551	42.4604	29.4052	509.241
Fc-fusion proteins	Mock		PS1		H302A		Dead		CBM40			Lectins	No lectin (AF488)		No lectin (AF594)		MALII		PNA
Cell line +/- sialidase (sia)	Calu3-sia	Calu3+sia	Calu3-sia	Calu3+sia	Calu3-sia	Calu3+sia	Calu3-sia	Calu3+sia	Calu3-sia	Calu3+sia		Cell line +/- sialidase (sia)	Calu3-sia	Calu3+sia	Calu3-sia	Calu3+sia	Calu3-sia	Calu3+sia	Calu3-sia	Calu3+sia
GMFI (1st)	386	430	402	439	1629	391	488	364	2675	532		GMFI (1st)	95	97	162	164	7644	326	231	6933
GMFI (2nd)	572	536	492	482	2588	601	578	545	3000	662		GMFI (2nd)	143	148	248	258	10320	548	332	7088
GMFI (3rd)	591	557	465	534	1585	506	501	450	2135	593		GMFI (3rd)	183	186	326	330	9262	438	381	6178
Average	516.333	507.667	453	485	1934	499.333	522.333	453	2603.33	595.667		Average	140.333	143.667	245.333	250.667	9075.33	437.333	314.667	6733
SD	92.4854	55.5838	37.7094	38.8416	462.797	85.8616	39.7185	73.9234	356.752	53.1058		SD	35.9753	36.4631	66.9793	67.9673	1100.42	90.6323	62.4518	397.513

## Sheet: Fig. 1f
Fig. 1f
Scatter plots with fitted curve showing the dose dependent binding of Fc-fusion proteins to cell surface glycans
All Fc-fusion protein binding was measured based on AF488 (goat anti-human IgG Fc gamma).
GMFI of PS1 or H302A pre-complexed with AF488 goat anti-human IgG Fc gamma was subtracted by GMFI of Mock (AF488 goat anti-human IgG Fc gamma only), and then the average and SD of subtracted numbers were plotted
Fc-fusion proteins	Mock
Cell line +/- sialidase (sia)	HEK-sia					HEK+sia
Protein concentration (ug/mL)	20	8	3.2	1.28	0.512	20	8	3.2	1.28	0.512
GMFI (1st)	180	162	118	92	86	156	126	110	90	90
GMFI (2nd)	222	243	150	144	125	182	172	138	125	119
Average	201	202.5	134	118	105.5	169	149	124	107.5	104.5
SD	21	40.5	16	26	19.5	13	23	14	17.5	14.5
Fc-fusion proteins	PS1
Cell line +/- sialidase (sia)	HEK-sia					HEK+sia
Protein concentration (ug/mL)	20	8	3.2	1.28	0.512	20	8	3.2	1.28	0.512
GMFI (1st)	27301	11717	1832	235	166	5276	3170	528	297	297
GMFI (2nd)	37455	13715	3018	479	278	4719	3476	1312	454	319
GMFI(PS1,1st) - GMFI(Mock,1st)	27121	11555	1714	143	80	5120	3044	418	207	207
GMFI(PS1,2nd) - GMFI(Mock,2nd)	37233	13472	2868	335	153	4537	3304	1174	329	200
Average	32177	12513.5	2291	239	116.5	4828.5	3174	796	268	203.5
SD	5056	958.5	577	96	36.5	291.5	130	378	61	3.5
Fc-fusion proteins	H302A
Cell line +/- sialidase (sia)	HEK-sia					HEK+sia
Protein concentration (ug/mL)	20	8	3.2	1.28	0.512	20	8	3.2	1.28	0.512
GMFI (1st)	48535	37532	6428	1247	887	3001	2332	524	197	185
GMFI (2nd)	61318	35121	9847	2465	1918	3237	1998	722	243	179
GMFI(H302A,1st) - GMFI(Mock,1st)	48355	37370	6310	1155	801	2845	2206	414	107	95
GMFI(H302A,2nd) - GMFI(Mock,2nd)	61096	34878	9697	2321	1793	3055	1826	584	118	60
Average	54725.5	36124	8003.5	1738	1297	2950	2016	499	112.5	77.5
SD	6370.5	1246	1693.5	583	496	105	190	85	5.5	17.5

## Sheet: Fig. 2c, d
Fig. 2c, d
Bar plots showing the binding of lectins or Fc-pST3Gal1 variants to a panel of isogenic CRISPR-Cas9 KO HEK293T cell lines
All Fc-fusion protein binding was measured based on AF488 (goat anti-human IgG Fc gamma), MALII lectin based on AF488 (direct conjugation), PNA based on AF594 (direct conjugation), PHA-L based on AF488 (direct conjugation) and ECL based on AF594 (direct conjugation). MALII and PNA were mixed and measured simultaneously. PHA-L and ECL were mixed and measured simultaneously
All samples were n = 6, except for PHA-L and ECL (n = 5)
Lectins	MALII (AF488)							PNA (AF594)							PHA-L (AF488)							ECL (AF594)
HEK293T Cell line	WT	MGAT1 KO	C1GalT1 KO	GCNT1 KO	SLC35A1 KO	ST3Gal1 KO		WT	MGAT1 KO	C1GalT1 KO	GCNT1 KO	SLC35A1 KO	ST3Gal1 KO		WT	MGAT1 KO	C1GalT1 KO	GCNT1 KO	SLC35A1 KO	ST3Gal1 KO		WT	MGAT1 KO	C1GalT1 KO	GCNT1 KO	SLC35A1 KO	ST3Gal1 KO
GMFI (1st)	1272	1142	149	2563	147	590		657	662	269	1888	16178	3612		4244	518	4990	6021	5453	5841		12582	1329	25722	11162	83666	9253
[truncated: 17 more rows]

## Sheet: Fig. 3b, c
Fig. 3b, c
[truncated: 2 more rows]

## Sheet: Fig. 3e
Fig. 3e
[truncated: 9 more rows]

## Sheet: Fig. 4b, c
Fig. 4b, c
[truncated: 350 more rows]

## Sheet: Fig. 5g
Fig. 5g
[truncated: 1,382 more rows]

## Sheet: Fig. 6a
Fig. 6a
[truncated: 2 more rows]

[truncated: 8 more sheets: Fig. 6b, Fig. 6c, Fig. 6d, Fig. 6e, Fig. 6f, Fig. S3a, Fig. S3d, Fig. S7c]
